# Supplementary material for: In mice and humans, brain microvascular contractility matures postnatally Brain microvessel post-natal maturation
Source: Research Square preprint supplement (doi:10.21203/rs.3.rs-1608620/v1), 2022-05-11
Supplement: Supplementary file 1 [file 1226731915f59444e9fbc706.xlsx]

## Sheet: Expressed
Ensembl reference name	id	Gene symbol	Description	baseMean P5	baseMean P15	log2FoldChange (P15 v. P5)	padj
ENSMUSG00000000001	GSMG0025919	Gnai3	guanine nucleotide binding protein (G protein), alpha inhibiting 3	1735.45	1368.47	-0.342306	0.0773194
ENSMUSG00000000028	GSMG0015524	Cdc45	cell division cycle 45	414.491	188.303	-1.13166	4.6843e-06
ENSMUSG00000000056	GSMG0043670	Narf	nuclear prelamin A recognition factor	764.32	876.465	0.199851	0.49964
ENSMUSG00000000058	GSMG0031519	Cav2	caveolin 2	2226.02	4238.78	0.92902	3.45487e-07
ENSMUSG00000000078	GSMG0009400	Klf6	Kruppel-like factor 6	1558.94	2110.68	0.437913	0.0346235
ENSMUSG00000000085	GSMG0027013	Scmh1	sex comb on midleg homolog 1	484.262	453.561	-0.0936166	0.758206
ENSMUSG00000000088	GSMG0039583	Cox5a	cytochrome c oxidase subunit Va	3400.48	3120.79	-0.124289	0.66312
ENSMUSG00000000093	GSMG0005699	Tbx2	T-box 2	850.757	1442.4	0.760691	0.00472028
ENSMUSG00000000094	GSMG0005701	Tbx4	T-box 4	320.686	118.272	-1.42702	2.42654e-08
ENSMUSG00000000127	GSMG0016849	Fer	fer (fms/fps related) protein kinase	444.444	472.084	0.0893563	0.806697
ENSMUSG00000000131	GSMG0036641	Xpo6	exportin 6	3457.82	2870.52	-0.268456	0.193425
ENSMUSG00000000134	GSMG0041562	Tfe3	transcription factor E3	838.057	912.382	0.123028	0.628725
ENSMUSG00000000142	GSMG0006054	Axin2	axin 2	498.297	515.828	0.0488631	0.964959
ENSMUSG00000000148	GSMG0029990	Brat1	BRCA1-associated ATM activator 1	573.42	678.155	0.242253	0.424275
ENSMUSG00000000149	GSMG0031296	Gna12	guanine nucleotide binding protein, alpha 12	757.125	893.341	0.237115	0.578917
ENSMUSG00000000159,ENSMUSG00000090223	GSMG0015351	Igsf5 // Pcp4	immunoglobulin superfamily, member 5 // Purkinje cell protein 4	500.357	469.317	-0.0936094	0.751099
ENSMUSG00000000168	GSMG0040738	Dlat	dihydrolipoamide S-acetyltransferase (E2 component of pyruvate dehydrogenase complex)	1214.32	1156.07	-0.0710317	0.784464
ENSMUSG00000000171	GSMG0040736	Sdhd	succinate dehydrogenase complex, subunit D, integral membrane protein	4378.59	3777.73	-0.212899	0.285689
ENSMUSG00000000184	GSMG0033704	Ccnd2	cyclin D2	1717.3	1626.84	-0.0775384	0.792839
ENSMUSG00000000194	GSMG0020900	Gpr107	G protein-coupled receptor 107	1234.5	1158.76	-0.0914895	0.718323
ENSMUSG00000000197	GSMG0050925	Nalcn	sodium leak channel, non-selective	97.3996	87.3659	-0.150486	0.789508
ENSMUSG00000000202	GSMG0007609	Btbd17	BTB (POZ) domain containing 17	296.68	425.04	0.519093	0.0366994
ENSMUSG00000000223	GSMG0042094	Drp2	dystrophin related protein 2	402.126	497.01	0.307889	0.246218
ENSMUSG00000000247	GSMG0020994	Lhx2	LIM homeobox protein 2	363.85	203.39	-0.838413	0.000327748
ENSMUSG00000000253	GSMG0009717	Gmpr	guanosine monophosphate reductase	1787.93	1239.31	-0.528776	0.000461512
ENSMUSG00000000266	GSMG0042153	Mid2	midline 2	113.025	99.7078	-0.173488	0.721275
ENSMUSG00000000275	GSMG0005754	Trim25	tripartite motif-containing 25	420.462	407.994	-0.0442994	0.920671
ENSMUSG00000000276	GSMG0007217	Dgke	diacylglycerol kinase, epsilon	198.038	175.272	-0.174993	0.621363
ENSMUSG00000000278	GSMG0007213	Scpep1	serine carboxypeptidase 1	1319.54	1236.12	-0.0938802	0.718579
ENSMUSG00000000295	GSMG0002851	Hddc2	HD domain containing 2	507.585	419.468	-0.275834	0.223535
ENSMUSG00000000296	GSMG0003949	Tpd52l1	tumor protein D52-like 1	1562.26	1741.4	0.156683	0.612533
ENSMUSG00000000301	GSMG0006746	Pemt	phosphatidylethanolamine N-methyltransferase	82.9758	49.2489	-0.74875	0.0535647
ENSMUSG00000000305	GSMG0022284	Cdh4	cadherin 4	110.351	75.043	-0.561303	0.138849
ENSMUSG00000000308	GSMG0021664	Ckmt1	creatine kinase, mitochondrial 1, ubiquitous	504.806	773.747	0.616431	0.00122831
ENSMUSG00000000317	GSMG0006899	Bcl6b	B cell CLL/lymphoma 6, member B	428.447	472.626	0.143769	0.601917
ENSMUSG00000000320	GSMG0006901	Alox12	arachidonate 12-lipoxygenase	49.8385	162.508	1.7097	1.16557e-06
ENSMUSG00000000325	GSMG0014751	Arvcf	armadillo repeat gene deleted in velo-cardio-facial syndrome	1335.58	1309.05	-0.0283405	0.942194
ENSMUSG00000000326	GSMG0050903	Comt	catechol-O-methyltransferase	1087.77	1144.7	0.0747516	0.7998
ENSMUSG00000000339	GSMG0025970	Rtca	RNA 3'-terminal phosphate cyclase	1578.19	1304.02	-0.275026	0.14435
ENSMUSG00000000340	GSMG0024846	Dbt	dihydrolipoamide branched chain transacylase E2	197.049	182.364	-0.106855	0.81282
ENSMUSG00000000346	GSMG0013649	Dazap2	DAZ associated protein 2	5983.21	6526.17	0.125393	0.580344
ENSMUSG00000000355	GSMG0041695	Mcts1	malignant T cell amplified sequence 1	760.789	643.238	-0.242736	0.302032
ENSMUSG00000000359	GSMG0021979	Rem1	rad and gem related GTP binding protein 1	213.431	348.276	0.705553	0.00254626
ENSMUSG00000000374	GSMG0004296	Trappc10	trafficking protein particle complex 10	496.878	484.125	-0.0368848	0.933197
ENSMUSG00000000378	GSMG0004868	Ccm2	cerebral cavernous malformation 2	1018.33	1003.24	-0.0211068	0.942758
ENSMUSG00000000384	GSMG0006329	Tbrg4	transforming growth factor beta regulated gene 4	534.427	477.042	-0.165022	0.554139
ENSMUSG00000000399	GSMG0033700	Ndufa9	NADH dehydrogenase (ubiquinone) 1 alpha subcomplex, 9	2875.38	2237.89	-0.361412	0.0424341
ENSMUSG00000000416	GSMG0032759	Cttnbp2	cortactin binding protein 2	1729.75	2014.84	0.219782	0.281816
ENSMUSG00000000420	GSMG0018133	Galnt1	UDP-N-acetyl-alpha-D-galactosamine:polypeptide N-acetylgalactosaminyltransferase 1	2672.33	2906.3	0.120895	0.587143
ENSMUSG00000000439	GSMG0032357	Mkrn2	makorin, ring finger protein, 2	567.221	538.141	-0.0762248	0.79107
ENSMUSG00000000440	GSMG0032353	Pparg	peroxisome proliferator activated receptor gamma	23.6595	118.729	2.32628	4.20331e-12
ENSMUSG00000000441	GSMG0033554	Raf1	v-raf-leukemia viral oncogene 1	3264.53	2892.26	-0.174638	0.419505
ENSMUSG00000000486	GSMG0036687	Sept1	septin 1	206.115	117.531	-0.819665	0.00221613
ENSMUSG00000000489	GSMG0014263	Pdgfb	platelet derived growth factor, B polypeptide	1333.21	1781.82	0.418468	0.017268
ENSMUSG00000000530	GSMG0013660	Acvrl1	activin A receptor, type II-like 1	2837.81	5108.72	0.84826	3.07566e-08
ENSMUSG00000000531	GSMG0013662	Grasp	GRP1 (general receptor for phosphoinositides 1)-associated scaffold protein	892.618	1532.37	0.779539	6.26072e-07
ENSMUSG00000000532	GSMG0013661	Acvr1b	activin A receptor, type 1B	181.26	97.0196	-0.894708	0.000970557
ENSMUSG00000000538	GSMG0006749	Tom1l2	target of myb1-like 2 (chicken)	1283.07	1913.3	0.576588	0.00131513
ENSMUSG00000000552	GSMG0014581	Zfp385a	zinc finger protein 385A	307.779	308.242	-0.00197426	0.997064
ENSMUSG00000000555	GSMG0014582	Itga5	integrin alpha 5 (fibronectin receptor alpha)	3792.65	2950.97	-0.362262	0.0278268
ENSMUSG00000000560	GSMG0030599	Gabra2	gamma-aminobutyric acid (GABA) A receptor, subunit alpha 2	569.66	490.124	-0.214884	0.514454
ENSMUSG00000000561,ENSMUSG00000074340	GSMG0024787	Wdr77 // Ovgp1	WD repeat domain 77 // oviductal glycoprotein 1	1181	850.047	-0.472293	0.0193798
ENSMUSG00000000563	GSMG0025874	Atp5f1	ATP synthase, H+ transporting, mitochondrial F0 complex, subunit B1	2759.4	2377.37	-0.214596	0.289436
ENSMUSG00000000567	GSMG0006075	Sox9	SRY (sex determining region Y)-box 9	1196.95	954.877	-0.328134	0.206641
ENSMUSG00000000568	GSMG0030783	Hnrnpd	heterogeneous nuclear ribonucleoprotein D	2344.27	1646.69	-0.510578	0.0181543
ENSMUSG00000000581	GSMG0004907	C1d	C1D nuclear receptor co-repressor	1701.68	1273.65	-0.418788	0.0834982
ENSMUSG00000000594	GSMG0005211	Gm2a	GM2 ganglioside activator protein	3420.42	4180.02	0.289328	0.0984123
ENSMUSG00000000600	GSMG0028787	Krit1	KRIT1, ankyrin repeat containing	1553.13	1463.09	-0.0859515	0.751794
ENSMUSG00000000605	GSMG0035488	Clcn4	chloride channel, voltage-sensitive 4	4879.37	4061.4	-0.264414	0.128657
ENSMUSG00000000627	GSMG0033231	Sema4f	sema domain, immunoglobulin domain (Ig), TM domain, and short cytoplasmic domain	257.555	189.649	-0.4401	0.210075
ENSMUSG00000000631	GSMG0043703	Myo18a	myosin XVIIIA	3829.44	3388.4	-0.176749	0.62691
ENSMUSG00000000632	GSMG0005572	Sez6	seizure related gene 6	5358.7	2630.23	-1.02667	1.27448e-07
ENSMUSG00000000682	GSMG0028481	Cd52	CD52 antigen	54.9213	26.6353	-1.03252	0.0352148
ENSMUSG00000000686	GSMG0043704	Abhd15	abhydrolase domain containing 15	312.037	254.713	-0.294891	0.316654
ENSMUSG00000000693	GSMG0032106	Loxl3	lysyl oxidase-like 3	866.3	787.352	-0.137812	0.61073
ENSMUSG00000000708	GSMG0016797	Kat2b	K(lysine) acetyltransferase 2B	341.797	505.278	0.562719	0.00467794
ENSMUSG00000000732	GSMG0003205	Icosl	icos ligand	57.9605	115.28	0.988334	0.00268242
ENSMUSG00000000738	GSMG0037952	Spg7	spastic paraplegia 7 homolog (human)	1207.36	1124.78	-0.101703	0.687565
ENSMUSG00000000743	GSMG0039037	Chmp1a	charged multivesicular body protein 1A	881.516	875.784	-0.00959736	0.974257
ENSMUSG00000000751	GSMG0006980	Rpa1	replication protein A1	2378.59	1702.82	-0.481752	0.0166157
ENSMUSG00000000753	GSMG0006982	Serpinf1	serine (or cysteine) peptidase inhibitor, clade F, member 1	1430.56	1835.34	0.360564	0.130266
ENSMUSG00000000759	GSMG0038104	Tubgcp3	tubulin, gamma complex associated protein 3	1626.06	1566.5	-0.0536662	0.832282
ENSMUSG00000000776	GSMG0012614	Polr3d	polymerase (RNA) III (DNA directed) polypeptide D	570.553	391.553	-0.544054	0.00347008
ENSMUSG00000000782	GSMG0006647	Tcf7	transcription factor 7, T cell specific	909.495	931.567	0.0346733	0.919485
ENSMUSG00000000787	GSMG0041607	Ddx3x	DEAD/H (Asp-Glu-Ala-Asp/His) box polypeptide 3, X-linked	2377.46	2342.6	-0.0206857	0.951727
ENSMUSG00000000792	GSMG0038569	Slc5a5	solute carrier family 5 (sodium iodide symporter), member 5	452.903	813.628	0.843654	1.88304e-05
ENSMUSG00000000804	GSMG0007141	Usp32	ubiquitin specific peptidase 32	354.159	326.128	-0.120481	0.693936
ENSMUSG00000000805	GSMG0005688	Car4	carbonic anhydrase 4	10611.7	16696.2	0.65394	8.34995e-05
ENSMUSG00000000811	GSMG0032205	Txnrd3	thioredoxin reductase 3	270.972	246.976	-0.136409	0.695939
ENSMUSG00000000823	GSMG0024046	Zfp512b	zinc finger protein 512B	2308.83	1891.96	-0.287556	0.386942
ENSMUSG00000000826	GSMG0022324	Dnajc5	DnaJ heat shock protein family (Hsp40) member C5	911.262	688.041	-0.406243	0.0641984
ENSMUSG00000000827	GSMG0022323	Tpd52l2	tumor protein D52-like 2	771.309	738.986	-0.0603448	0.857607
ENSMUSG00000000838	GSMG0041799	Fmr1	fragile X mental retardation syndrome 1	717.442	556.915	-0.365021	0.0905173
ENSMUSG00000000861	GSMG0004963	Bcl11a	B cell CLL/lymphoma 11A (zinc finger protein)	502.464	209.676	-1.26636	1.52421e-09
ENSMUSG00000000876	GSMG0023738	Pxmp4	peroxisomal membrane protein 4	707.24	781.383	0.144045	0.573043
ENSMUSG00000000881	GSMG0041958	Dlg3	discs, large homolog 3 (Drosophila)	1134.63	1005.65	-0.173992	0.417317
ENSMUSG00000000884	GSMG0014755	Gnb1l	guanine nucleotide binding protein (G protein), beta polypeptide 1-like	120.295	87.9907	-0.445114	0.210796
ENSMUSG00000000901	GSMG0004263	Mmp11	matrix metallopeptidase 11	274.545	201.369	-0.446152	0.0872668
ENSMUSG00000000902	GSMG0004262	Smarcb1	SWI/SNF related, matrix associated, actin dependent regulator of chromatin, subfamily b, member 1	1673.4	1215.61	-0.461031	0.00870339
ENSMUSG00000000915	GSMG0029806	Hip1r	huntingtin interacting protein 1 related	1161.59	1351.08	0.217657	0.487938
ENSMUSG00000000916	GSMG0029904	Nsun5	NOL1/NOP2/Sun domain family, member 5	535.035	464.648	-0.201749	0.418731
ENSMUSG00000000934	GSMG0014139	Top1mt	DNA topoisomerase 1, mitochondrial	529.44	364.968	-0.537962	0.0101843
ENSMUSG00000000957	GSMG0011570	Mmp14	matrix metallopeptidase 14 (membrane-inserted)	2721.87	1950.37	-0.480468	0.00141403
ENSMUSG00000000958	GSMG0012393	Slc7a7	solute carrier family 7 (cationic amino acid transporter, y+ system), member 7	557.643	209.455	-1.40709	1.7323e-11
ENSMUSG00000000959	GSMG0011568	Oxa1l	oxidase assembly 1-like	1235.09	1055.26	-0.225987	0.28191
ENSMUSG00000000976	GSMG0005672	Heatr6	HEAT repeat containing 6	871.115	678.792	-0.359118	0.0830153
ENSMUSG00000001016	GSMG0024579	Ilf2	interleukin enhancer binding factor 2	1013.04	742.104	-0.448846	0.0306228
ENSMUSG00000001017	GSMG0025669	Chtop	chromatin target of PRMT1	739.844	643.507	-0.200073	0.425607
ENSMUSG00000001018	GSMG0025668	Snapin	SNAP-associated protein	2197.3	2559.36	0.219825	0.233423
ENSMUSG00000001025	GSMG0024587	S100a6	S100 calcium binding protein A6 (calcyclin)	167.427	282.219	0.750538	0.00569684
ENSMUSG00000001029	GSMG0007513	Icam2	intercellular adhesion molecule 2	3708.4	5292.82	0.513406	0.00512038
ENSMUSG00000001034	GSMG0006770	Mapk7	mitogen-activated protein kinase 7	1615.35	1677.06	0.0539984	0.865426
ENSMUSG00000001036	GSMG0006774	Epn2	epsin 2	1994.88	2291.38	0.199918	0.296192
ENSMUSG00000001039	GSMG0005307	B9d1	B9 protein domain 1	355.064	346.238	-0.0343706	0.924003
ENSMUSG00000001052	GSMG0026059	Sec24b	Sec24 related gene family, member B (S. cerevisiae)	1419.06	1286.5	-0.140848	0.589959
ENSMUSG00000001053	GSMG0006637	N4bp3	NEDD4 binding protein 3	1846.21	1737.51	-0.0878742	0.739254
ENSMUSG00000001054	GSMG0006635	Rmnd5b	required for meiotic nuclear division 5 homolog B	1563.81	1605.68	0.03867	0.896981
ENSMUSG00000001056	GSMG0005163	Nhp2	NHP2 ribonucleoprotein	1271.71	709.1	-0.842855	2.47982e-07
ENSMUSG00000001062	GSMG0039039	Vps9d1	VPS9 domain containing 1	1343.7	1445.37	0.106245	0.712409
ENSMUSG00000001065	GSMG0037960	Zfp276	zinc finger protein (C2H2 type) 276	582.255	749.137	0.364634	0.15934
ENSMUSG00000001082	GSMG0030374	Mfsd10	major facilitator superfamily domain containing 10	2777.97	2070.83	-0.423228	0.0110711
ENSMUSG00000001089	GSMG0051019	Luzp1	leucine zipper protein 1	6247.02	7730.49	0.307265	0.0529232
ENSMUSG00000001098	GSMG0030950	Kctd10	potassium channel tetramerisation domain containing 10	2373.7	2849.45	0.263453	0.157819
ENSMUSG00000001100	GSMG0005600	Poldip2	polymerase (DNA-directed), delta interacting protein 2	3485.92	3263.96	-0.0948161	0.683907
ENSMUSG00000001105	GSMG0005595	Ift20	intraflagellar transport 20	1262.44	1478.2	0.227339	0.322207
ENSMUSG00000001119	GSMG0004273	Col6a1	collagen, type VI, alpha 1	1353.1	5794.4	2.09846	2.87878e-30
ENSMUSG00000001120	GSMG0004275	Pcbp3	poly(rC) binding protein 3	513.658	426.833	-0.267406	0.285211
ENSMUSG00000001123	GSMG0007060	Lgals9	lectin, galactose binding, soluble 9	2964.82	2733.36	-0.116718	0.660028
ENSMUSG00000001127	GSMG0041631	Araf	Araf proto-oncogene, serine/threonine kinase	1713.95	1607.57	-0.0918988	0.710683
ENSMUSG00000001128	GSMG0042394	Cfp	complement factor properdin	137.09	280.163	1.03671	3.5446e-05
ENSMUSG00000001131	GSMG0041633	Timp1	tissue inhibitor of metalloproteinase 1	290.311	168.734	-0.776125	0.00250453
ENSMUSG00000001134	GSMG0042397	Uxt	ubiquitously expressed transcript	168.398	154.44	-0.119702	0.770858
ENSMUSG00000001138	GSMG0000143	Cnnm3	cyclin M3	174.507	289.033	0.726592	0.0543217
ENSMUSG00000001143	GSMG0001469	Lman2l	lectin, mannose-binding 2-like	237.064	261.589	0.14249	0.651417
ENSMUSG00000001150	GSMG0003182	Mcm3ap	minichromosome maintenance complex component 3 associated protein	2300.01	2281.98	-0.0114211	0.97669
ENSMUSG00000001151	GSMG0004268	Pcnt	pericentrin (kendrin)	627.174	651.013	0.0525783	0.88973
ENSMUSG00000001156	GSMG0033306	Mxd1	MAX dimerization protein 1	737.428	959.068	0.379111	0.0533913
ENSMUSG00000001157	GSMG0033309	Gmcl1	germ cell-less, spermatogenesis associated 1	1539.85	1690.78	0.134323	0.554129
ENSMUSG00000001158	GSMG0033308	Snrnp27	small nuclear ribonucleoprotein 27 (U4/U6.U5)	1000.49	769.239	-0.380034	0.196389
ENSMUSG00000001173	GSMG0041723	Ocrl	oculocerebrorenal syndrome of Lowe	1183.48	1411.74	0.254091	0.194287
ENSMUSG00000001175	GSMG0008440	Calm1	calmodulin 1	45069.6	42121.3	-0.0976463	0.737456
ENSMUSG00000001211	GSMG0004298	Agpat3	1-acylglycerol-3-phosphate O-acyltransferase 3	1961.53	2385.63	0.282553	0.267608
ENSMUSG00000001227	GSMG0017687	Sema6b	sema domain, transmembrane domain (TM), and cytoplasmic domain, (semaphorin) 6B	979.511	971.31	-0.0120445	0.979099
ENSMUSG00000001228	GSMG0016817	Uhrf1	ubiquitin-like, containing PHD and RING finger domains, 1	855.438	364.576	-1.22754	2.36576e-08
ENSMUSG00000001229	GSMG0017689	Dpp9	dipeptidylpeptidase 9	2060.98	2168.35	0.0731534	0.806165
ENSMUSG00000001240	GSMG0065019	Ramp2	receptor (calcitonin) activity modifying protein 2	13687.2	14598.1	0.0929396	0.694763
ENSMUSG00000001247	GSMG0035766	Lsr	lipolysis stimulated lipoprotein receptor	8149.35	10058.6	0.303769	0.0639488
ENSMUSG00000001248	GSMG0035774	Gramd1a	GRAM domain containing 1A	2823.22	2361	-0.25748	0.22786
ENSMUSG00000001260	GSMG0030598	Gabrg1	gamma-aminobutyric acid (GABA) A receptor, subunit gamma 1	150.239	118.063	-0.347598	0.287168
ENSMUSG00000001270	GSMG0009336	Ckb	creatine kinase, brain	5850	8398.7	0.521686	0.00122831
ENSMUSG00000001280	GSMG0013692	Sp1	trans-acting transcription factor 1	1307.31	1129.21	-0.211882	0.280336
ENSMUSG00000001285	GSMG0013690	Myg1	melanocyte proliferating gene 1	495	445.168	-0.154773	0.570512
ENSMUSG00000001288	GSMG0014554	Rarg	retinoic acid receptor, gamma	293.637	340.323	0.20903	0.653724
ENSMUSG00000001289	GSMG0013689	Pfdn5	prefoldin 5	1434.45	1194.12	-0.265827	0.242103
ENSMUSG00000001300	GSMG0038057	Efnb2	ephrin B2	2430.65	2531.07	0.0579242	0.850671
ENSMUSG00000001305	GSMG0002605	Rrp15	ribosomal RNA processing 15 homolog (S. cerevisiae)	544.843	370.356	-0.558151	0.013795
ENSMUSG00000001313	GSMG0005946	Rnd2	Rho family GTPase 2	710.353	1003.92	0.498856	0.006106
ENSMUSG00000001323	GSMG0006974	Srr	serine racemase	457.987	461	0.0116011	0.974257
ENSMUSG00000001334	GSMG0027118	Fndc5	fibronectin type III domain containing 5	100.778	189.143	0.906124	0.00607479
ENSMUSG00000001348	GSMG0040469	Acp5	acid phosphatase 5, tartrate resistant	159.256	132.224	-0.261231	0.509898
ENSMUSG00000001366	GSMG0041042	Fbxo9	f-box protein 9	1311.01	1495.87	0.190288	0.358237
ENSMUSG00000001376	GSMG0031430	Vps50	VPS50 EARP/GARPII complex subunit	440.71	424.412	-0.0528654	0.871686
ENSMUSG00000001380	GSMG0018862	Hars	histidyl-tRNA synthetase	2063.31	1809.66	-0.188313	0.391566
ENSMUSG00000001383	GSMG0018263	Zmat2	zinc finger, matrin type 2	1024.05	934.902	-0.131379	0.612639
ENSMUSG00000001403	GSMG0022154	Ube2c	ubiquitin-conjugating enzyme E2C	930.656	397.485	-1.22683	1.22867e-11
ENSMUSG00000001415	GSMG0024515	Smg5	Smg-5 homolog, nonsense mediated mRNA decay factor (C. elegans)	2820.69	2848.52	0.0137695	0.969598
ENSMUSG00000001416	GSMG0024513	Cct3	chaperonin containing Tcp1, subunit 3 (gamma)	4399.29	3214.34	-0.452149	0.0184362
ENSMUSG00000001418	GSMG0024514	Glmp	glycosylated lysosomal membrane protein	2481.83	2807.01	0.177801	0.365356
ENSMUSG00000001419	GSMG0024509	Mef2d	myocyte enhancer factor 2D	1318.31	1281.26	-0.0415249	0.893017
ENSMUSG00000001424	GSMG0031581	Snd1	staphylococcal nuclease and tudor domain containing 1	5094.08	3742.94	-0.444607	0.00154639
ENSMUSG00000001435	GSMG0004282	Col18a1	collagen, type XVIII, alpha 1	8546.73	6563.59	-0.380886	0.107566
ENSMUSG00000001436	GSMG0003189	Slc19a1	solute carrier family 19 (folate transporter), member 1	2958.05	3508.51	0.246376	0.174735
ENSMUSG00000001440	GSMG0007302	Kpnb1	karyopherin (importin) beta 1	1549.59	1218.17	-0.348025	0.169105
ENSMUSG00000001441	GSMG0007303	Npepps	aminopeptidase puromycin sensitive	995.379	902.534	-0.141254	0.523577
ENSMUSG00000001445	GSMG0005854	Mrpl10	mitochondrial ribosomal protein L10	449.035	323.738	-0.470682	0.0416211
ENSMUSG00000001467	GSMG0030130	Cyp51	cytochrome P450, family 51	1355.81	855.383	-0.663704	3.43786e-05
ENSMUSG00000001472	GSMG0037964	Tcf25	transcription factor 25 (basic helix-loop-helix)	5441.7	6050.58	0.153152	0.534996
ENSMUSG00000001473	GSMG0018529	Tubb6	tubulin, beta 6 class V	4588.35	2726.89	-0.750207	3.75339e-06
ENSMUSG00000001482	GSMG0037950	Def8	differentially expressed in FDCP 8	578.695	557.774	-0.0523813	0.87211
ENSMUSG00000001493	GSMG0007428	Meox1	mesenchyme homeobox 1	2141.66	1732.57	-0.305195	0.114272
ENSMUSG00000001506	GSMG0005795	Col1a1	collagen, type I, alpha 1	7734.39	6534.33	-0.243556	0.410328
ENSMUSG00000001507	GSMG0007263	Itga3	integrin alpha 3	105.316	143.986	0.451166	0.189278
ENSMUSG00000001517	GSMG0043487	Foxm1	forkhead box M1	213.242	96.4717	-1.15208	9.88675e-05
ENSMUSG00000001518	GSMG0033726	Itfg2	integrin alpha FG-GAP repeat containing 2	425.719	383.511	-0.151515	0.583489
ENSMUSG00000001520	GSMG0032514	Nrip2	nuclear receptor interacting protein 2	87.8118	335.441	1.93786	3.78965e-17
ENSMUSG00000001524	GSMG0017472	Gtf2h4	general transcription factor II H, polypeptide 4	437.469	409.768	-0.0917947	0.772245
ENSMUSG00000001525	GSMG0017474	Tubb5	tubulin, beta 5 class I	11481.6	4823.9	-1.25089	5.40085e-16
ENSMUSG00000001542	GSMG0009948	Ell2	elongation factor RNA polymerase II 2	170.345	155.292	-0.136022	0.736146
ENSMUSG00000001552	GSMG0007388	Jup	junction plakoglobin	5034.57	4756.19	-0.0821183	0.796195
ENSMUSG00000001555	GSMG0005914	Fkbp10	FK506 binding protein 10	2865.91	2098.27	-0.449092	0.0244864
ENSMUSG00000001569	GSMG0028971	Nom1	nucleolar protein with MIF4G domain 1	1053.68	790.494	-0.414181	0.0170937
ENSMUSG00000001576	GSMG0016409	Ergic1	endoplasmic reticulum-golgi intermediate compartment (ERGIC) 1	1339.77	960.222	-0.479474	0.0139757
ENSMUSG00000001627	GSMG0008820	Ifrd1	interferon-related developmental regulator 1	967.675	880.099	-0.136227	0.586818
ENSMUSG00000001630	GSMG0032656	Stk38l	serine/threonine kinase 38 like	80.9492	100.406	0.306981	0.483701
ENSMUSG00000001632	GSMG0032329	Brpf1	bromodomain and PHD finger containing, 1	711.392	728.138	0.033247	0.929154
ENSMUSG00000001663	GSMG0004257	Gstt1	glutathione S-transferase, theta 1	74.8067	102.109	0.450775	0.232918
ENSMUSG00000001666	GSMG0004255	Ddt	D-dopachrome tautomerase	369.893	350.845	-0.0810854	0.849836
ENSMUSG00000001687	GSMG0031386	Ubl3	ubiquitin-like 3	3916.62	4815.82	0.297991	0.0758505
ENSMUSG00000001700	GSMG0018419	Gramd3	GRAM domain containing 3	414.867	406.346	-0.0274013	0.94053
ENSMUSG00000001707	GSMG0010565	Eef1e1	eukaryotic translation elongation factor 1 epsilon 1	461.861	250.107	-0.884698	1.78012e-05
ENSMUSG00000001729	GSMG0009350	Akt1	thymoma viral proto-oncogene 1	6417.16	6711.7	0.0646324	0.865016
ENSMUSG00000001750	GSMG0019913	Tcirg1	T cell, immune regulator 1, ATPase, H+ transporting, lysosomal V0 protein A3	998.708	914.694	-0.125949	0.636224
ENSMUSG00000001751	GSMG0005928	Naglu	alpha-N-acetylglucosaminidase (Sanfilippo disease IIIB)	227.958	274.356	0.27288	0.420655
ENSMUSG00000001755	GSMG0060485	Coasy	Coenzyme A synthase	582.953	507.738	-0.19854	0.406473
ENSMUSG00000001761	GSMG0031603	Smo	smoothened, frizzled class receptor	580.986	577.302	-0.0075613	0.98529
ENSMUSG00000001763	GSMG0031601	Tspan33	tetraspanin 33	72.4542	133.747	0.883906	0.0101853
ENSMUSG00000001767	GSMG0023637	Crnkl1	Crn, crooked neck-like 1 (Drosophila)	1086.91	975.681	-0.155075	0.527651
ENSMUSG00000001768	GSMG0021912	Rin2	Ras and Rab interactor 2	194.169	312.401	0.688048	0.00365541
ENSMUSG00000001774	GSMG0039175	Chordc1	cysteine and histidine-rich domain (CHORD)-containing, zinc-binding protein 1	643.837	668.832	0.0557275	0.860969
ENSMUSG00000001783	GSMG0004413	Rtcb	RNA 2',3'-cyclic phosphate and 5'-OH ligase	2398.25	2024.29	-0.243665	0.257916
ENSMUSG00000001785	GSMG0003347	Pwp1	PWP1 homolog, endonuclein	1100.82	781.991	-0.491356	0.00998491
ENSMUSG00000001786	GSMG0003349	Fbxo7	F-box protein 7	237.882	328.837	0.466662	0.0365293
ENSMUSG00000001794	GSMG0035734	Capns1	calpain, small subunit 1	1335.72	1589.36	0.249735	0.380842
ENSMUSG00000001802	GSMG0035801	Lrp3	low density lipoprotein receptor-related protein 3	760.059	1102.39	0.53638	0.476071
ENSMUSG00000001829	GSMG0034901	Clpb	ClpB caseinolytic peptidase B	1327.48	1111.91	-0.254766	0.202787
ENSMUSG00000001833	GSMG0039257	Sept7	septin 7	7250.55	7899.49	0.12363	0.672344
ENSMUSG00000001844	GSMG0031325	Zdhhc4	zinc finger, DHHC domain containing 4	1319.81	1276.81	-0.0474093	0.863402
ENSMUSG00000001847	GSMG0031329	Rac1	RAS-related C3 botulinum substrate 1	15797.6	14836.2	-0.090661	0.714006
ENSMUSG00000001855	GSMG0020911	Nup214	nucleoporin 214	1920.96	1732.99	-0.148655	0.546908
ENSMUSG00000001864	GSMG0020910	Aif1l	allograft inflammatory factor 1-like	1708.93	2064.21	0.272876	0.273738
ENSMUSG00000001870	GSMG0016928	Ltbp1	latent transforming growth factor beta binding protein 1	34.0321	122.479	1.85597	1.12315e-07
ENSMUSG00000001891	GSMG0006393	Ugp2	UDP-glucose pyrophosphorylase 2	2918.29	2321.68	-0.330413	0.154346
ENSMUSG00000001909	GSMG0037538	Trmt1	tRNA methyltransferase 1	1920.73	1756.07	-0.128479	0.609577
ENSMUSG00000001910	GSMG0038684	Nacc1	nucleus accumbens associated 1, BEN and BTB (POZ) domain containing	1021.98	898.061	-0.187937	0.597768
ENSMUSG00000001911	GSMG0038687	Nfix	nuclear factor I/X	2322.5	1344.5	-0.789184	4.31263e-05
ENSMUSG00000001918	GSMG0034061	Slc1a5	solute carrier family 1 (neutral amino acid transporter), member 5	398.894	433.773	0.121658	0.694551
ENSMUSG00000001924	GSMG0041628	Uba1	ubiquitin-like modifier activating enzyme 1	8201.43	5957.38	-0.461175	0.00154639
ENSMUSG00000001930	GSMG0032492	Vwf	Von Willebrand factor	5090.49	4345.14	-0.228384	0.778544
ENSMUSG00000001942	GSMG0039355	Siae	sialic acid acetylesterase	164.505	197.958	0.272232	0.417569
ENSMUSG00000001943	GSMG0039354	Vsig2	V-set and immunoglobulin domain containing 2	387.916	404.529	0.0634888	0.867331
ENSMUSG00000001946	GSMG0039353	Esam	endothelial cell-specific adhesion molecule	11339.5	14967.1	0.400542	0.0128303
ENSMUSG00000001962	GSMG0041858	Fam50a	family with sequence similarity 50, member A	1078.67	1203.95	0.159642	0.531919
ENSMUSG00000001983	GSMG0006027	Taco1	translational activator of mitochondrially encoded cytochrome c oxidase I	155.197	134.79	-0.205159	0.632364
ENSMUSG00000001986	GSMG0041699	Gria3	glutamate receptor, ionotropic, AMPA3 (alpha 3)	368.084	704.976	0.938714	6.16226e-07
ENSMUSG00000001988	GSMG0035542	Npas1	neuronal PAS domain protein 1	246.899	149.3	-0.722686	0.0140029
ENSMUSG00000001995	GSMG0039067	Sipa1l2	signal-induced proliferation-associated 1 like 2	1051.09	984.142	-0.0951901	0.796201
ENSMUSG00000001998	GSMG0021735	Ap4e1	adaptor-related protein complex AP-4, epsilon 1	122.181	102.092	-0.265259	0.513691
ENSMUSG00000001999	GSMG0021737	Blvra	biliverdin reductase A	658.953	601.894	-0.12984	0.679355
ENSMUSG00000002007	GSMG0041846	Srpk3	serine/arginine-rich protein specific kinase 3	49.0913	204.68	2.06656	5.18666e-12
ENSMUSG00000002010	GSMG0042596	Idh3g	isocitrate dehydrogenase 3 (NAD+), gamma	2821.38	3644.86	0.370033	0.0646037
ENSMUSG00000002012	GSMG0042594	Pnck	pregnancy upregulated non-ubiquitously expressed CaM kinase	1845.04	1603.5	-0.201998	0.452927
ENSMUSG00000002014	GSMG0041847	Ssr4	signal sequence receptor, delta	1657.93	1672.47	0.0125796	0.964019
ENSMUSG00000002015	GSMG0042595	Bcap31	B cell receptor associated protein 31	3053.15	3141.17	0.0410448	0.888534
ENSMUSG00000002017	GSMG0017862	Fam98a	family with sequence similarity 98, member A	403.461	434.947	0.107801	0.754909
ENSMUSG00000002028	GSMG0040672	Kmt2a	lysine (K)-specific methyltransferase 2A	312.519	267.597	-0.226918	0.47245
ENSMUSG00000002031	GSMG0039447	Ift46	intraflagellar transport 46	592.101	531.23	-0.155022	0.557632
ENSMUSG00000002032	GSMG0040670	Tmem25	transmembrane protein 25	610.638	1310.95	1.10318	6.19417e-11
ENSMUSG00000002043	GSMG0034117	Trappc6a	trafficking protein particle complex 6A	456.254	500.673	0.132824	0.627588
ENSMUSG00000002052	GSMG0007040	Supt6	suppressor of Ty 6	363.877	349.159	-0.0573884	0.884074
ENSMUSG00000002055	GSMG0005591	Spag5	sperm associated antigen 5	373.611	264.165	-0.494384	0.110331
ENSMUSG00000002058	GSMG0005594	Unc119	unc-119 lipid binding chaperone	462.828	239.371	-0.955851	7.81525e-07
ENSMUSG00000002059	GSMG0005586	Rab34	RAB34, member RAS oncogene family	1269.41	1222.5	-0.0535768	0.870008
ENSMUSG00000002064	GSMG0005588	Sdf2	stromal cell derived factor 2	1331.93	1539.81	0.210163	0.322744
ENSMUSG00000002068	GSMG0035820	Ccne1	cyclin E1	240.809	143.232	-0.748564	0.00474312
ENSMUSG00000002083	GSMG0034050	Bbc3	BCL2 binding component 3	274.603	214.888	-0.36167	0.33298
ENSMUSG00000002102	GSMG0021381	Psmc3	proteasome (prosome, macropain) 26S subunit, ATPase 3	5127.68	4775.4	-0.102485	0.675293
ENSMUSG00000002103	GSMG0021385	Acp2	acid phosphatase 2, lysosomal	1382.38	1405.77	0.025174	0.935553
ENSMUSG00000002105	GSMG0023165	Slc39a13	solute carrier family 39 (metal ion transporter), member 13	293.129	351.895	0.263398	0.325395
ENSMUSG00000002107	GSMG0022366	Celf2	CUGBP, Elav-like family member 2	2031.69	1660.42	-0.290374	0.132921
ENSMUSG00000002108	GSMG0023168	Nr1h3	nuclear receptor subfamily 1, group H, member 3	325.881	417.447	0.35681	0.172803
ENSMUSG00000002109	GSMG0023171	Ddb2	damage specific DNA binding protein 2	85.3193	117.649	0.468729	0.227227
ENSMUSG00000002129	GSMG0004833	Sf3a1	splicing factor 3a, subunit 1	2420.84	1951.02	-0.311112	0.0508399
ENSMUSG00000002147	GSMG0003662	Stat6	signal transducer and activator of transcription 6	1887.66	2735.67	0.535443	0.00256505
ENSMUSG00000002205	GSMG0034442	Vrk3	vaccinia related kinase 3	1011.1	1117.01	0.144565	0.52172
ENSMUSG00000002210	GSMG0034149	Smg9	smg-9 homolog, nonsense mediated mRNA decay factor (C. elegans)	849.877	810.354	-0.0691838	0.831648
ENSMUSG00000002221	GSMG0030289	Paxip1	PAX interacting (with transcription-activation domain) protein 1	1390.96	1232.11	-0.174978	0.47245
ENSMUSG00000002222	GSMG0033156	Rmnd5a	required for meiotic nuclear division 5 homolog A	152.609	231.379	0.597176	0.0633593
ENSMUSG00000002227	GSMG0025859	Mov10	Moloney leukemia virus 10	1200.69	1116.17	-0.105237	0.669491
ENSMUSG00000002228	GSMG0024775	Ppm1j	protein phosphatase 1J	277.571	278.26	0.00505472	0.989605
ENSMUSG00000002233	GSMG0024776	Rhoc	ras homolog family member C	3655.95	3604.34	-0.0206116	0.948285
ENSMUSG00000002250	GSMG0016437	Ppard	peroxisome proliferator activator receptor delta	100.832	109.611	0.108862	0.874609
ENSMUSG00000002257	GSMG0016435	Def6	differentially expressed in FDCP 6	1086.01	1001.47	-0.117968	0.641787
ENSMUSG00000002265	GSMG0035480	Peg3	paternally expressed 3	204.672	212.283	0.0549304	0.900198
ENSMUSG00000002274	GSMG0017257	Metrn	meteorin, glial cell differentiation regulator	212.955	217.649	0.0290364	0.948185
ENSMUSG00000002279	GSMG0016380	Lmf1	lipase maturation factor 1	435.529	387.803	-0.167171	0.533523
ENSMUSG00000002280	GSMG0016385	Narfl	nuclear prelamin A recognition factor-like	608.746	556.125	-0.130516	0.62099
ENSMUSG00000002289	GSMG0017406	Angptl4	angiopoietin-like 4	2669.04	1933.48	-0.464573	0.00988307
ENSMUSG00000002297	GSMG0030164	Dbf4	DBF4 zinc finger	307.86	142.796	-1.108	3.29977e-06
ENSMUSG00000002307	GSMG0016528	Daxx	Fas death domain-associated protein	1097.84	911.204	-0.268924	0.189676
ENSMUSG00000002308	GSMG0016525	Cd320	CD320 antigen	1529.01	1489.39	-0.0366641	0.908108
ENSMUSG00000002319	GSMG0012422	Ipo4	importin 4	3168.74	2213.02	-0.517448	0.00557723
ENSMUSG00000002320	GSMG0012423	Tm9sf1	transmembrane 9 superfamily member 1	2414.87	2505.58	0.0536219	0.838425
ENSMUSG00000002325	GSMG0011604	Irf9	interferon regulatory factor 9	615.434	614.979	-0.0012294	0.997627
ENSMUSG00000002326	GSMG0011609	Gmpr2	guanosine monophosphate reductase 2	454.233	435.602	-0.0598251	0.85321
ENSMUSG00000002329	GSMG0012424	Mdp1	magnesium-dependent phosphatase 1	1416.34	1550.12	0.130193	0.552628
ENSMUSG00000002332	GSMG0012430	Dhrs1	dehydrogenase/reductase (SDR family) member 1	1304.22	1446.15	0.149593	0.53573
ENSMUSG00000002341	GSMG0038542	Ncan	neurocan	11117.3	4370.89	-1.34693	1.41346e-18
ENSMUSG00000002342	GSMG0037375	Tmem161a	transmembrane protein 161A	1280.74	1391	0.119727	0.610897
ENSMUSG00000002343	GSMG0038546	Armc6	armadillo repeat containing 6	726.857	536.489	-0.438394	0.0229781
ENSMUSG00000002345,ENSMUSG00000079033	GSMG0060654	2310045n01rik-mef2b // Borcs8 // Mef2b // Gm45929	2310045N01Rik-mef2b readthrough // BLOC-1 related complex subunit 8 // myocyte enhancer factor 2B // predicted gene, 45929	279.015	328.851	0.239829	0.377356
ENSMUSG00000002346	GSMG0038544	Slc25a42	solute carrier family 25, member 42	526.273	512.746	-0.0375191	0.91623
ENSMUSG00000002365	GSMG0016170	Snx9	sorting nexin 9	1524.11	1364.96	-0.158949	0.457956
ENSMUSG00000002372	GSMG0016826	Ranbp3	RAN binding protein 3	1433.92	1143.45	-0.325456	0.0976323
ENSMUSG00000002379	GSMG0016827	Ndufa11	NADH dehydrogenase (ubiquinone) 1 alpha subcomplex 11	2145.83	2025.84	-0.083714	0.772034
ENSMUSG00000002393	GSMG0038573	Nr2f6	nuclear receptor subfamily 2, group F, member 6	2213.05	2041.39	-0.117356	0.62935
ENSMUSG00000002395	GSMG0037413	Use1	unconventional SNARE in the ER 1 homolog (S. cerevisiae)	818.683	863.189	0.0759907	0.802161
ENSMUSG00000002396	GSMG0037414	Ocel1	occludin/ELL domain containing 1	1433.18	1903.49	0.408758	0.0223469
ENSMUSG00000002409	GSMG0034238	Dyrk1b	dual-specificity tyrosine-(Y)-phosphorylation regulated kinase 1b	397.563	541.721	0.446579	0.102142
ENSMUSG00000002413	GSMG0032926	Braf	Braf transforming gene	300.002	375.275	0.324556	0.187292
ENSMUSG00000002416	GSMG0031727	Ndufb2	NADH dehydrogenase (ubiquinone) 1 beta subcomplex, 2	2039.8	1740.37	-0.229806	0.303365
ENSMUSG00000002428	GSMG0024135	Hltf	helicase-like transcription factor	294.332	370.667	0.333193	0.274613
ENSMUSG00000002455	GSMG0022327	Prpf6	pre-mRNA splicing factor 6	600.148	595.688	-0.00887511	0.979793
ENSMUSG00000002458	GSMG0024049	Rgs19	regulator of G-protein signaling 19	905.614	665.604	-0.442864	0.0190228
ENSMUSG00000002475	GSMG0018710	Abhd3	abhydrolase domain containing 3	295.607	825.975	1.48313	1.75501e-16
ENSMUSG00000002477	GSMG0018057	Snrpd1	small nuclear ribonucleoprotein D1	968.708	543.641	-0.833343	1.50036e-07
ENSMUSG00000002486	GSMG0029659	Tchp	trichoplein, keratin filament binding	328.454	289.775	-0.184041	0.521498
ENSMUSG00000002489	GSMG0016046	Tiam1	T cell lymphoma invasion and metastasis 1	942.386	833.677	-0.179018	0.485647
ENSMUSG00000002496	GSMG0017228	Tsc2	tuberous sclerosis 2	4415.58	4603.12	0.0600742	0.851588
ENSMUSG00000002504	GSMG0017229	Slc9a3r2	solute carrier family 9 (sodium/hydrogen exchanger), member 3 regulator 2	10671.5	17664.9	0.727096	1.7269e-07
ENSMUSG00000002524	GSMG0014153	Puf60	poly-U binding splicing factor 60	3120.99	2943.19	-0.0841849	0.736948
ENSMUSG00000002546	GSMG0020917	Golga2	golgi autoantigen, golgin subfamily a, 2	1544.46	1526.34	-0.0168172	0.958426
ENSMUSG00000002550	GSMG0022634	Uck1	uridine-cytidine kinase 1	334.68	325.829	-0.0344466	0.935289
ENSMUSG00000002580	GSMG0007327	Mien1	migration and invasion enhancer 1	1381.14	1116.1	-0.307855	0.130199
ENSMUSG00000002602	GSMG0035656	Axl	AXL receptor tyrosine kinase	4202.53	5095.29	0.277836	0.107182
ENSMUSG00000002603	GSMG0034184	Tgfb1	transforming growth factor, beta 1	605.142	674.454	0.154112	0.716453
ENSMUSG00000002608	GSMG0035654	Ccdc97	coiled-coil domain containing 97	474.437	431.399	-0.136131	0.619596
ENSMUSG00000002617	GSMG0017190	Zfp40	zinc finger protein 40	681.049	748.543	0.136888	0.559515
ENSMUSG00000002625	GSMG0017371	Akap8l	A kinase (PRKA) anchor protein 8-like	4120.59	7679.77	0.898291	5.34562e-09
ENSMUSG00000002635	GSMG0035784	Pdcd2l	programmed cell death 2-like	630.296	547.552	-0.201364	0.421097
ENSMUSG00000002658	GSMG0017712	Gtf2f1	general transcription factor IIF, polypeptide 1	957.279	863.743	-0.146971	0.528834
ENSMUSG00000002660	GSMG0016832	Clpp	caseinolytic mitochondrial matrix peptidase proteolytic subunit	1503.49	1387.69	-0.11545	0.597097
ENSMUSG00000002661	GSMG0016833	Alkbh7	alkB homolog 7	340.333	334.259	-0.0257596	0.943568
ENSMUSG00000002679	GSMG0009080	Med6	mediator complex subunit 6	427.831	365.345	-0.228415	0.361534
ENSMUSG00000002688	GSMG0008844	Prkd1	protein kinase D1	286.573	283.173	-0.0149442	0.971562
ENSMUSG00000002699	GSMG0005028	Lcp2	lymphocyte cytosolic protein 2	287.999	186.05	-0.623737	0.0384873
ENSMUSG00000002718	GSMG0022186	Cse1l	chromosome segregation 1-like (S. cerevisiae)	878.687	664.372	-0.402704	0.046895
ENSMUSG00000002728	GSMG0021914	Naa20	N(alpha)-acetyltransferase 20, NatB catalytic subunit	1808.23	1639.55	-0.140974	0.505433
ENSMUSG00000002731	GSMG0023008	Prkra	protein kinase, interferon inducible double stranded RNA dependent activator	450.297	306.227	-0.554816	0.0414082
ENSMUSG00000002732	GSMG0023009	Fkbp7	FK506 binding protein 7	653.372	716.279	0.132408	0.680857
ENSMUSG00000002733	GSMG0021267	Plekha3	pleckstrin homology domain-containing, family A (phosphoinositide binding specific) member 3	464.649	585.472	0.333699	0.264095
ENSMUSG00000002741	GSMG0004860	Ykt6	YKT6 v-SNARE homolog (S. cerevisiae)	2555.54	2021.57	-0.338165	0.105985
ENSMUSG00000002748	GSMG0029901	Baz1b	bromodomain adjacent to zinc finger domain, 1B	349.661	315.214	-0.152368	0.610598
ENSMUSG00000002763	GSMG0016738	Pex6	peroxisomal biogenesis factor 6	1849.94	2007.37	0.118285	0.65628
ENSMUSG00000002767	GSMG0016731	Mrpl2	mitochondrial ribosomal protein L2	1194.71	956.6	-0.320363	0.085551
ENSMUSG00000002768	GSMG0016737	Mea1	male enhanced antigen 1	1699.06	1437.31	-0.240559	0.286885
ENSMUSG00000002771	GSMG0035925	Grin2d	glutamate receptor, ionotropic, NMDA2D (epsilon 4)	466.839	233.611	-1.00142	0.00286142
ENSMUSG00000002778	GSMG0034488	Kdelr1	KDEL (Lys-Asp-Glu-Leu) endoplasmic reticulum protein retention receptor 1	880.34	886.009	0.0100461	0.975849
ENSMUSG00000002781	GSMG0034489	Tmem143	transmembrane protein 143	66.2617	80.2615	0.271341	0.595728
ENSMUSG00000002799	GSMG0009357	Jag2	jagged 2	1734.27	3365.76	0.956562	0.137502
ENSMUSG00000002803	GSMG0008597	Btbd6	BTB (POZ) domain containing 6	115.49	120.643	0.0595663	0.909447
ENSMUSG00000002804	GSMG0009358	Nudt14	nudix (nucleoside diphosphate linked moiety X)-type motif 14	1043.83	946.041	-0.14206	0.557219
ENSMUSG00000002808	GSMG0010370	Epdr1	ependymin related protein 1 (zebrafish)	962.982	1309.71	0.443205	0.00572592
ENSMUSG00000002812	GSMG0006756	Flii	flightless I actin binding protein	4950.47	5216.76	0.0758041	0.758206
ENSMUSG00000002814	GSMG0006757	Top3a	topoisomerase (DNA) III alpha	381.558	280.151	-0.442379	0.112216
ENSMUSG00000002820	GSMG0039214	Atg4d	autophagy related 4D, cysteine peptidase	601.201	780.937	0.379135	0.103461
ENSMUSG00000002825	GSMG0039220	Qtrt1	queuine tRNA-ribosyltransferase 1	572.069	481.319	-0.248162	0.277189
ENSMUSG00000002833	GSMG0016810	Hdgfrp2	hepatoma-derived growth factor, related protein 2	4250.92	4284.45	0.0114	0.967048
ENSMUSG00000002835	GSMG0016809	Chaf1a	chromatin assembly factor 1, subunit A (p150)	685.236	283.11	-1.27428	2.78317e-11
ENSMUSG00000002844	GSMG0015729	Adprh	ADP-ribosylarginine hydrolase	1453.69	1111.56	-0.388124	0.0272505
ENSMUSG00000002845	GSMG0014975	Tmem39a	transmembrane protein 39a	260.842	355.591	0.451047	0.0667236
ENSMUSG00000002846	GSMG0015730	Timmdc1	translocase of inner mitochondrial membrane domain containing 1	232.029	262.899	0.184005	0.562764
ENSMUSG00000002847	GSMG0015728	Pla1a	phospholipase A1 member A	274.64	496.68	0.856772	9.47138e-06
ENSMUSG00000002870	GSMG0033349	Mcm2	minichromosome maintenance complex component 2	2024.72	839.176	-1.26839	3.2488e-11
ENSMUSG00000002871	GSMG0032199	Tpra1	transmembrane protein, adipocyte asscociated 1	1980.96	2250.16	0.184158	0.396367
ENSMUSG00000002881	GSMG0001564	Nab1	Ngfi-A binding protein 1	570.878	699.058	0.291574	0.22877
ENSMUSG00000002885	GSMG0038664	Adgre5	adhesion G protein-coupled receptor E5	3233.56	4596.31	0.507587	0.000754346
ENSMUSG00000002897	GSMG0032408	Il17ra	interleukin 17 receptor A	88.466	129.619	0.550687	0.124749
ENSMUSG00000002900	GSMG0007935	Lamb1	laminin B1	9291.33	4903.9	-0.921997	3.64334e-11
ENSMUSG00000002908	GSMG0038567	Kcnn1	potassium intermediate/small conductance calcium-activated channel, subfamily N, member 1	206.613	113.454	-0.863216	0.00369805
ENSMUSG00000002910	GSMG0038566	Arrdc2	arrestin domain containing 2	342.85	373.25	0.124834	0.695548
ENSMUSG00000002948,ENSMUSG00000089736	GSMG0036960	Map2k7 // Tgfbr3l	mitogen-activated protein kinase kinase 7 // transforming growth factor, beta receptor III-like	885.255	932.064	0.0736903	0.815009
ENSMUSG00000002949	GSMG0038047	Timm44	translocase of inner mitochondrial membrane 44	1967.59	2435.43	0.307338	0.0888094
ENSMUSG00000002957	GSMG0035349	Ap2a2	adaptor-related protein complex 2, alpha 2 subunit	4451.27	3889.49	-0.194635	0.286586
ENSMUSG00000002963	GSMG0034447	Pnkp	polynucleotide kinase 3'- phosphatase	1210.46	1502.6	0.312302	0.0725608
ENSMUSG00000002968	GSMG0035877	Med25	mediator complex subunit 25	2761.39	2331.56	-0.244415	0.210771
ENSMUSG00000002980	GSMG0035598	Bcam	basal cell adhesion molecule	2086.22	4475.2	1.10113	3.52606e-12
ENSMUSG00000002981	GSMG0035590	Clptm1	cleft lip and palate associated transmembrane protein 1	6353.05	5898.66	-0.106947	0.631414
ENSMUSG00000002983	GSMG0035589	Relb	avian reticuloendotheliosis viral (v-rel) oncogene related B	417.435	352.347	-0.242036	0.407999
ENSMUSG00000002984	GSMG0035596	Tomm40	translocase of outer mitochondrial membrane 40 homolog (yeast)	1726.06	1500.25	-0.202285	0.306764
ENSMUSG00000002985	GSMG0035595	Apoe	apolipoprotein E	20178.7	38317.5	0.925213	1.73107e-08
ENSMUSG00000002996	GSMG0008785	Hbp1	high mobility group box transcription factor 1	2728.09	3339.87	0.292033	0.071229
ENSMUSG00000002997	GSMG0008786	Prkar2b	protein kinase, cAMP dependent regulatory, type II beta	595.25	335.703	-0.827514	3.5054e-06
ENSMUSG00000003032	GSMG0027822	Klf4	Kruppel-like factor 4 (gut)	585.636	1204.72	1.03886	4.14305e-05
ENSMUSG00000003033	GSMG0037445	Ap1m1	adaptor-related protein complex AP-1, mu subunit 1	2868.16	2160.14	-0.408286	0.0209149
ENSMUSG00000003037	GSMG0037442	Rab8a	RAB8A, member RAS oncogene family	3242.79	2718.64	-0.25403	0.206048
ENSMUSG00000003039	GSMG0037444	Fam32a	family with sequence similarity 32, member A	3171.66	3102.64	-0.0315333	0.910541
ENSMUSG00000003062	GSMG0010367	Stard3nl	STARD3 N-terminal like	1308.68	1540.98	0.235379	0.292621
ENSMUSG00000003068	GSMG0003247	Stk11	serine/threonine kinase 11	526.823	455.627	-0.208432	0.474799
ENSMUSG00000003070	GSMG0003254	Efna2	ephrin A2	296.723	158.59	-0.903003	0.000355922
ENSMUSG00000003072	GSMG0003250	Atp5d	ATP synthase, H+ transporting, mitochondrial F1 complex, delta subunit	5017.26	4810.51	-0.0609542	0.820139
ENSMUSG00000003099	GSMG0035553	Ppp5c	protein phosphatase 5, catalytic subunit	2657.11	2566.16	-0.0500906	0.844998
ENSMUSG00000003119	GSMG0005874	Cdk12	cyclin-dependent kinase 12	520.745	496.15	-0.0685786	0.820931
ENSMUSG00000003123	GSMG0035644	Lipe	lipase, hormone sensitive	551.797	613.384	0.152937	0.546087
ENSMUSG00000003131	GSMG0040698	Pafah1b2	platelet-activating factor acetylhydrolase, isoform 1b, subunit 2	5369.52	4874.9	-0.139258	0.523577
ENSMUSG00000003134	GSMG0001517	Tbc1d8	TBC1 domain family, member 8	575.604	543.956	-0.0823048	0.818075
ENSMUSG00000003135	GSMG0000172	Cnot11	CCR4-NOT transcription complex, subunit 11	440.567	359.155	-0.293672	0.193545
ENSMUSG00000003153	GSMG0033645	Slc2a3	solute carrier family 2 (facilitated glucose transporter), member 3	1021.98	1570.15	0.619615	0.000436057
ENSMUSG00000003154	GSMG0032444	Foxj2	forkhead box J2	403.873	494.375	0.290223	0.339354
ENSMUSG00000003161	GSMG0028799	Sri	sorcin	2939.26	2962.15	0.011114	0.972161
ENSMUSG00000003166,ENSMUSG00000090236	GSMG0015510	Car15 // Dgcr2	carbonic anhydrase 15 // DiGeorge syndrome critical region gene 2	1898.53	1636.3	-0.213739	0.394669
ENSMUSG00000003184	GSMG0034454	Irf3	interferon regulatory factor 3	977.616	1117.26	0.19302	0.331883
ENSMUSG00000003190	GSMG0035883	Bcl2l12	BCL2-like 12 (proline rich)	230.025	179.453	-0.363876	0.224357
ENSMUSG00000003198	GSMG0016803	Zfp959	zinc finger protein 959	348.456	390.688	0.16802	0.581934
ENSMUSG00000003199	GSMG0016808	Mpnd	MPN domain containing	2143.5	2452.18	0.194521	0.315398
ENSMUSG00000003200	GSMG0017681	Sh3gl1	SH3-domain GRB2-like 1	2381.31	2513.82	0.0782206	0.737386
ENSMUSG00000003208	GSMG0016805	Ccdc94	coiled-coil domain containing 94	435.999	342.294	-0.347255	0.109275
ENSMUSG00000003226	GSMG0003022	Ranbp2	RAN binding protein 2	1811.01	1754.49	-0.0457868	0.857115
ENSMUSG00000003228	GSMG0019899	Grk5	G protein-coupled receptor kinase 5	488.015	282.737	-0.783456	0.000141845
ENSMUSG00000003233	GSMG0014773	Dvl3	dishevelled segment polarity protein 3	1135.52	1028.35	-0.143396	0.619934
ENSMUSG00000003234	GSMG0014775	Abcf3	ATP-binding cassette, sub-family F (GCN20), member 3	2314.48	2528.88	0.127619	0.542457
ENSMUSG00000003235	GSMG0014772	Eif2b5	eukaryotic translation initiation factor 2B, subunit 5 epsilon	2323.74	2143.21	-0.116525	0.578917
ENSMUSG00000003269	GSMG0035922	Cyth2	cytohesin 2	1959.73	1889.02	-0.0530541	0.842558
ENSMUSG00000003273	GSMG0034481	Car11	carbonic anhydrase 11	2002.8	2102.2	0.0691613	0.812875
ENSMUSG00000003279	GSMG0016887	Dlgap1	discs, large (Drosophila) homolog-associated protein 1	1660.2	2495.48	0.588048	6.27886e-05
ENSMUSG00000003299	GSMG0039206	Mrpl4	mitochondrial ribosomal protein L4	2242.81	2297.75	0.0350111	0.892572
ENSMUSG00000003308	GSMG0040437	Keap1	kelch-like ECH-associated protein 1	1066.06	1046.89	-0.0270739	0.933404
ENSMUSG00000003316	GSMG0038923	Glg1	golgi apparatus protein 1	2174.88	2074.29	-0.0673655	0.820895
ENSMUSG00000003344	GSMG0004342	Btbd2	BTB (POZ) domain containing 2	491.467	499.872	0.0213577	0.961777
ENSMUSG00000003345	GSMG0003272	Csnk1g2	casein kinase 1, gamma 2	4011.66	4315.32	0.105176	0.7326
ENSMUSG00000003346	GSMG0004341	Abhd17a	abhydrolase domain containing 17A	5572.03	4265.33	-0.385469	0.00889742
ENSMUSG00000003348	GSMG0043685	Mob3a	MOB kinase activator 3A	360.224	307.139	-0.228102	0.378002
ENSMUSG00000003352	GSMG0013591	Cacnb3	calcium channel, voltage-dependent, beta 3 subunit	2011.78	946.387	-1.08805	3.5271e-07
ENSMUSG00000003355	GSMG0014475	Fkbp11	FK506 binding protein 11	93.2284	98.6007	0.0781726	0.904589
ENSMUSG00000003363	GSMG0035674	Pld3	phospholipase D family, member 3	3597.79	4655.04	0.371861	0.0435224
ENSMUSG00000003378	GSMG0035632	Grik5	glutamate receptor, ionotropic, kainate 5 (gamma 2)	1531.45	2133.12	0.477939	0.0302878
ENSMUSG00000003380	GSMG0035630	Rabac1	Rab acceptor 1 (prenylated)	3845.81	4401.47	0.19467	0.299334
ENSMUSG00000003382	GSMG0024494	Etv3	ets variant 3	1050.42	1239.48	0.237605	0.349293
ENSMUSG00000003402	GSMG0039232	Prkcsh	protein kinase C substrate 80K-H	2482.21	2284.29	-0.12006	0.576572
ENSMUSG00000003410	GSMG0040462	Elavl3	ELAV (embryonic lethal, abnormal vision, Drosophila)-like 3 (Hu antigen C)	222.448	104.407	-1.09704	0.000146781
ENSMUSG00000003411	GSMG0026895	Rab3b	RAB3B, member RAS oncogene family	697.02	338.706	-1.04279	2.26625e-08
ENSMUSG00000003418	GSMG0022431	St8sia6	ST8 alpha-N-acetyl-neuraminide alpha-2,8-sialyltransferase 6	23.2272	147.39	2.66591	6.81744e-15
ENSMUSG00000003420	GSMG0035891	Fcgrt	Fc receptor, IgG, alpha chain transporter	6002.69	9927.75	0.725968	1.8496e-06
ENSMUSG00000003421	GSMG0034456	Nosip	nitric oxide synthase interacting protein	1080.74	1137.81	0.0740918	0.777519
ENSMUSG00000003423	GSMG0034458	Pih1d1	PIH1 domain containing 1	924.393	603.426	-0.614603	0.000636902
ENSMUSG00000003429	GSMG0035892	Rps11	ribosomal protein S11	4014.66	2517.88	-0.67349	3.65643e-05
ENSMUSG00000003435	GSMG0035693	Supt5	suppressor of Ty 5	4919.66	4584.44	-0.101909	0.690443
ENSMUSG00000003437	GSMG0034246	Paf1	Paf1, RNA polymerase II complex component	1736.3	1982.77	0.19229	0.359565
ENSMUSG00000003438	GSMG0035692	Timm50	translocase of inner mitochondrial membrane 50	990.981	794.063	-0.318697	0.0999966
ENSMUSG00000003444	GSMG0035696	Med29	mediator complex subunit 29	447.148	356.072	-0.32855	0.13765
ENSMUSG00000003452	GSMG0032681	Bicd1	bicaudal D homolog 1 (Drosophila)	1205.13	1490.88	0.308166	0.154159
ENSMUSG00000003458	GSMG0002466	Ncstn	nicastrin	4626.35	4483.65	-0.0449513	0.867087
ENSMUSG00000003464	GSMG0001060	Pex19	peroxisomal biogenesis factor 19	551.368	592.833	0.105251	0.699354
ENSMUSG00000003469	GSMG0011769	Phyhip	phytanoyl-CoA hydroxylase interacting protein	97.9735	361.939	1.88238	8.53288e-11
ENSMUSG00000003500	GSMG0032802	Impdh1	inosine 5'-phosphate dehydrogenase 1	3498.69	4019.53	0.200345	0.322583
ENSMUSG00000003518	GSMG0007431	Dusp3	dual specificity phosphatase 3 (vaccinia virus phosphatase VH1-related)	3851.59	4592.49	0.253512	0.342014
ENSMUSG00000003526	GSMG0015514	Prodh	proline dehydrogenase	285.157	544.193	0.933199	6.96402e-05
ENSMUSG00000003527	GSMG0015511	Dgcr14	DiGeorge syndrome critical region gene 14	1434.85	1268.44	-0.177604	0.365025
ENSMUSG00000003528	GSMG0015513	Slc25a1	solute carrier family 25 (mitochondrial carrier, citrate transporter), member 1	1391.29	1414.72	0.0248648	0.932863
ENSMUSG00000003531	GSMG0014746	Dgcr6	DiGeorge syndrome critical region gene 6	1696.19	1627.33	-0.0595978	0.815249
ENSMUSG00000003534	GSMG0017473	Ddr1	discoidin domain receptor family, member 1	675.88	810.986	0.262716	0.462257
ENSMUSG00000003541	GSMG0016606	Ier3	immediate early response 3	332.955	1014.76	1.60777	4.37592e-21
ENSMUSG00000003546	GSMG0017604	Klc4	kinesin light chain 4	1003.19	1212.94	0.274846	0.23681
ENSMUSG00000003549	GSMG0034111	Ercc1	excision repair cross-complementing rodent repair deficiency, complementation group 1	668.584	556.615	-0.262253	0.274387
ENSMUSG00000003559	GSMG0019774	As3mt	arsenic (+3 oxidation state) methyltransferase	703.349	745.148	0.0844313	0.812553
ENSMUSG00000003573	GSMG0037378	Homer3	homer scaffolding protein 3	721.081	546.234	-0.403556	0.0597405
ENSMUSG00000003575	GSMG0038550	Crtc1	CREB regulated transcription coactivator 1	570.15	534.859	-0.0918789	0.794291
ENSMUSG00000003581	GSMG0004832	Rnf215	ring finger protein 215	1732.75	1951.65	0.172134	0.405757
ENSMUSG00000003585	GSMG0006268	Sec14l2	SEC14-like lipid binding 2	72.2991	109.163	0.592257	0.132492
ENSMUSG00000003604	GSMG0021564	Aven	apoptosis, caspase activation inhibitor	83.0866	107.919	0.370881	0.363879
ENSMUSG00000003617	GSMG0024133	Cp	ceruloplasmin	553.57	1265.96	1.19448	1.19504e-08
ENSMUSG00000003623	GSMG0030170	Crot	carnitine O-octanoyltransferase	1095.2	1231.29	0.169057	0.449838
ENSMUSG00000003644	GSMG0028477	Rps6ka1	ribosomal protein S6 kinase polypeptide 1	1005.4	718.128	-0.485221	0.00916183
ENSMUSG00000003657	GSMG0038910	Calb2	calbindin 2	83.8954	67.2814	-0.322923	0.532967
ENSMUSG00000003660	GSMG0021738	Snrnp200	small nuclear ribonucleoprotein 200 (U5)	1111.96	1015.19	-0.130312	0.644029
ENSMUSG00000003662	GSMG0023488	Ciao1	cytosolic iron-sulfur protein assembly 1	543.849	598.671	0.140316	0.603162
ENSMUSG00000003680	GSMG0043807	Taf6l	TATA-box binding protein associated factor 6 like	272.628	201.333	-0.431236	0.114731
ENSMUSG00000003721	GSMG0002008	Insig2	insulin induced gene 2	418.647	533.389	0.3477	0.13022
ENSMUSG00000003731	GSMG0028410	Kpna6	karyopherin (importin) alpha 6	781.923	712.897	-0.135239	0.621839
ENSMUSG00000003746	GSMG0004102	Man1a	mannosidase 1, alpha	575.161	655.823	0.186875	0.46976
ENSMUSG00000003752	GSMG0035667	Itpkc	inositol 1,4,5-trisphosphate 3-kinase C	58.7476	66.3577	0.169081	0.774015
ENSMUSG00000003762	GSMG0034206	Adck4	aarF domain containing kinase 4	364.857	461.763	0.341418	0.163463
ENSMUSG00000003778	GSMG0018826	Brd8	bromodomain containing 8	976.894	768.71	-0.344751	0.0546836
ENSMUSG00000003779	GSMG0018212	Kif20a	kinesin family member 20A	1258.07	603.962	-1.05744	2.35469e-07
ENSMUSG00000003808	GSMG0037545	Farsa	phenylalanyl-tRNA synthetase, alpha subunit	1101.94	932.822	-0.239031	0.237917
ENSMUSG00000003809	GSMG0038692	Gcdh	glutaryl-Coenzyme A dehydrogenase	452.629	637.716	0.496878	0.018854
ENSMUSG00000003810	GSMG0028231	Mast2	microtubule associated serine/threonine kinase 2	1447.65	1095.67	-0.401617	0.139105
ENSMUSG00000003812	GSMG0037549	Dnase2a // Gm38426	deoxyribonuclease II alpha // predicted gene, 38426	86.3494	116.128	0.424885	0.283585
ENSMUSG00000003813	GSMG0038690	Rad23a	RAD23 homolog A, nucleotide excision repair protein	1072.61	987.952	-0.118862	0.623752
ENSMUSG00000003814	GSMG0038691	Calr	calreticulin	19123.8	14963.4	-0.353866	0.0254695
ENSMUSG00000003824	GSMG0037546	Syce2	synaptonemal complex central element protein 2	180.379	65.1195	-1.46892	8.3783e-08
ENSMUSG00000003847	GSMG0037777	Nfat5	nuclear factor of activated T cells 5	391.722	477.237	0.28754	0.243382
ENSMUSG00000003848	GSMG0038887	Nob1	NIN1/RPN12 binding protein 1 homolog	438.685	326.976	-0.425465	0.0523458
ENSMUSG00000003849	GSMG0038886	Nqo1	NAD(P)H dehydrogenase, quinone 1	53.4447	62.9498	0.242207	0.706507
ENSMUSG00000003863	GSMG0035902	Ppfia3	protein tyrosine phosphatase, receptor type, f polypeptide (PTPRF), interacting protein (liprin), alpha 3	1281.7	1384.22	0.110697	0.74744
ENSMUSG00000003865	GSMG0034470	Gys1	glycogen synthase 1, muscle	371.784	318.784	-0.218316	0.488157
ENSMUSG00000003868	GSMG0035906	Ruvbl2	RuvB-like protein 2	1844.17	1328.31	-0.472168	0.00916183
ENSMUSG00000003872	GSMG0035903	Lin7b	lin-7 homolog B (C. elegans)	779.595	1656.64	1.08813	3.03677e-11
ENSMUSG00000003873	GSMG0035908	Bax	BCL2-associated X protein	2740.47	2330.91	-0.233913	0.191451
ENSMUSG00000003923	GSMG0004235	Tfam	transcription factor A, mitochondrial	954.325	742.125	-0.363034	0.0550512
ENSMUSG00000003929	GSMG0017397	Zfp81	zinc finger protein 81	229.916	243.732	0.0889411	0.835053
ENSMUSG00000003934	GSMG0006868	Efnb3	ephrin B3	1555.88	687.525	-1.17993	1.86783e-08
ENSMUSG00000003948	GSMG0005758	Mmd	monocyte to macrophage differentiation-associated	3347.64	2639.51	-0.343258	0.0801987
ENSMUSG00000003949	GSMG0007227	Hlf	hepatic leukemia factor	120.536	127.543	0.080855	0.872097
ENSMUSG00000003955	GSMG0015706	Fam162a	family with sequence similarity 162, member A	930.041	957.795	0.0426173	0.896924
ENSMUSG00000003970	GSMG0013333	Rpl8	ribosomal protein L8	3628.7	2885.21	-0.330722	0.0564496
ENSMUSG00000003974	GSMG0030175	Grm3	glutamate receptor, metabotropic 3	1247.27	855.478	-0.54212	0.00267745
ENSMUSG00000003992	GSMG0010030	Ssbp2	single-stranded DNA binding protein 2	1261.45	706.953	-0.833101	7.00912e-07
ENSMUSG00000004018	GSMG0004970	Fancl	Fanconi anemia, complementation group L	331.426	233.178	-0.504043	0.0412496
ENSMUSG00000004031	GSMG0002290	Brinp2	bone morphogenic protein/retinoic acid inducible neural-specific 2	426.951	487.635	0.190997	0.578586
ENSMUSG00000004032	GSMG0024809	Gstm5	glutathione S-transferase, mu 5	2582.81	2554.55	-0.0157582	0.954285
ENSMUSG00000004035	GSMG0025911	Gstm7	glutathione S-transferase, mu 7	1226.99	1336.83	0.123885	0.639279
ENSMUSG00000004040	GSMG0007408	Stat3	signal transducer and activator of transcription 3	3848.14	3486.47	-0.142515	0.472025
ENSMUSG00000004044	GSMG0007409	Ptrf	polymerase I and transcript release factor	6220.34	7123.02	0.195154	0.465346
ENSMUSG00000004054	GSMG0019313	Map3k11	mitogen-activated protein kinase kinase kinase 11	3393.6	3447.28	0.0224261	0.939767
ENSMUSG00000004056	GSMG0034218	Akt2	thymoma viral proto-oncogene 2	907.574	1036.7	0.193149	0.424272
ENSMUSG00000004069	GSMG0014602	Dnaja3	DnaJ heat shock protein family (Hsp40) member A3	1700.71	1711.87	0.00963804	0.973529
ENSMUSG00000004070	GSMG0014603	Hmox2	heme oxygenase 2	68.0098	73.7556	0.123766	0.835537
ENSMUSG00000004071	GSMG0015391	Cdip1	cell death inducing Trp53 target 1	988.738	978.449	-0.0139724	0.964959
ENSMUSG00000004085	GSMG0021217	Zak	sterile alpha motif and leucine zipper containing kinase AZK	687.083	903.794	0.39499	0.0381267
ENSMUSG00000004096	GSMG0039159	Cwc15	CWC15 spliceosome-associated protein	1275.9	1107.78	-0.203348	0.448241
ENSMUSG00000004098	GSMG0040424	Col5a3	collagen, type V, alpha 3	373.268	929.062	1.31391	3.96153e-09
ENSMUSG00000004099	GSMG0040427	Dnmt1	DNA methyltransferase (cytosine-5) 1	4761.67	2806.62	-0.762495	5.40207e-08
ENSMUSG00000004100	GSMG0039204	Ppan	peter pan homolog (Drosophila)	915.8	664.707	-0.462777	0.00872289
ENSMUSG00000004105	GSMG0020937	Angptl2	angiopoietin-like 2	1203.6	1321.37	0.135724	0.654925
ENSMUSG00000004110	GSMG0002248	Cacna1e	calcium channel, voltage-dependent, R type, alpha 1E subunit	1102.39	1212.14	0.137587	0.634378
ENSMUSG00000004113	GSMG0022506	Cacna1b	calcium channel, voltage-dependent, N type, alpha 1B subunit	184.568	130.591	-0.503457	0.135331
ENSMUSG00000004127	GSMG0025004	Trmt10a	tRNA methyltransferase 10A	148.56	106.511	-0.480756	0.132185
ENSMUSG00000004187	GSMG0013324	Kifc2	kinesin family member C2	4907.22	8246.37	0.748946	2.90859e-05
ENSMUSG00000004207	GSMG0003044	Psap	prosaposin	8691.77	9901.69	0.188061	0.383589
ENSMUSG00000004221	GSMG0041861	Ikbkg	inhibitor of kappaB kinase gamma	380.25	455.933	0.262344	0.280086
ENSMUSG00000004233	GSMG0024716	Wars2	tryptophanyl tRNA synthetase 2 (mitochondrial)	67.8111	63.7781	-0.0802989	0.904589
ENSMUSG00000004263,ENSMUSG00000072772	GSMG0033662	Grcc10 // Atn1	gene rich cluster, C10 gene // atrophin 1	4104.22	3259.81	-0.332772	0.0744095
ENSMUSG00000004264	GSMG0032465	Phb2	prohibitin 2	2904.4	2067.71	-0.490064	0.00439522
ENSMUSG00000004266	GSMG0033661	Ptpn6	protein tyrosine phosphatase, non-receptor type 6	200.719	222.361	0.152326	0.690714
ENSMUSG00000004267	GSMG0033663	Eno2	enolase 2, gamma neuronal	1500.8	2639.1	0.814714	9.62439e-07
ENSMUSG00000004268	GSMG0033660	Emg1	EMG1 N1-specific pseudouridine methyltransferase	1443.59	1116.23	-0.370457	0.0402749
ENSMUSG00000004270	GSMG0032463	Lpcat3	lysophosphatidylcholine acyltransferase 3	3083.76	3081.51	-0.000834797	0.997976
ENSMUSG00000004285	GSMG0031596	Atp6v1f	ATPase, H+ transporting, lysosomal V1 subunit F	1914.34	1975.97	0.0457104	0.861145
ENSMUSG00000004317	GSMG0042315	Clcn5	chloride channel, voltage-sensitive 5	276.233	159.58	-0.788266	0.00105642
ENSMUSG00000004319	GSMG0038473	Clcn3	chloride channel, voltage-sensitive 3	4744.07	4268.97	-0.152174	0.439037
ENSMUSG00000004356	GSMG0050834	Utp20	UTP20 small subunit processome component	289.259	186.523	-0.63972	0.00937744
ENSMUSG00000004360	GSMG0002846	9330159F19Rik	RIKEN cDNA 9330159F19 gene	448.421	518.223	0.208571	0.403019
ENSMUSG00000004364	GSMG0001803	Cul3	cullin 3	1162.26	1781.9	0.615676	0.0163671
ENSMUSG00000004366	GSMG0015581	Sst	somatostatin	1284.46	1548.11	0.268834	0.359047
ENSMUSG00000004383	GSMG0038606	Large	like-glycosyltransferase	569.03	500.917	-0.184392	0.574152
ENSMUSG00000004393	GSMG0006317	Ddx56	DEAD (Asp-Glu-Ala-Asp) box polypeptide 56	1655.17	1315.64	-0.331161	0.0434021
ENSMUSG00000004394	GSMG0006318	Tmed4	transmembrane emp24 protein transport domain containing 4	3385.01	3619.67	0.0964892	0.705855
ENSMUSG00000004415	GSMG0031225	Col26a1	collagen, type XXVI, alpha 1	340.601	360.75	0.0836768	0.824301
ENSMUSG00000004446	GSMG0033630	Bid	BH3 interacting domain death agonist	314.762	179.601	-0.804823	0.000550256
ENSMUSG00000004451	GSMG0001987	Ralb	v-ral simian leukemia viral oncogene B	2077.48	1341.83	-0.63044	7.2322e-05
ENSMUSG00000004460	GSMG0014796	Dnajb11	DnaJ heat shock protein family (Hsp40) member B11	2683.36	2272.67	-0.239313	0.236556
ENSMUSG00000004462	GSMG0015573	Tbccd1	TBCC domain containing 1	289.397	278.007	-0.0544459	0.891934
ENSMUSG00000004500	GSMG0034030	Zfp324	zinc finger protein 324	494.32	650.675	0.39393	0.134824
ENSMUSG00000004508	GSMG0034834	Gab2	growth factor receptor bound protein 2-associated protein 2	400.108	423.849	0.0854143	0.843759
ENSMUSG00000004530	GSMG0030943	Coro1c	coronin, actin binding protein 1C	2038.91	1297.77	-0.651342	6.69062e-06
ENSMUSG00000004535	GSMG0031900	Tax1bp1	Tax1 (human T cell leukemia virus type I) binding protein 1	4761.19	4710.11	-0.0155018	0.962225
ENSMUSG00000004558	GSMG0012369	Ndrg2	N-myc downstream regulated gene 2	4368.41	5567.79	0.350353	0.0688078
ENSMUSG00000004561	GSMG0011537	Mettl17	methyltransferase like 17	1814.27	1798.26	-0.01247	0.965367
ENSMUSG00000004562	GSMG0011539	Arhgef40	Rho guanine nucleotide exchange factor (GEF) 40	1700.69	1570.87	-0.11502	0.795055
ENSMUSG00000004565	GSMG0036946	Pnpla6	patatin-like phospholipase domain containing 6	6338.06	6706.26	0.081462	0.769063
ENSMUSG00000004567	GSMG0036945	Mcoln1	mucolipin 1	3010.16	3059.74	0.0238161	0.931553
ENSMUSG00000004568	GSMG0036940	Arhgef18	rho/rac guanine nucleotide exchange factor (GEF) 18	652.776	690.645	0.0799401	0.82486
ENSMUSG00000004591	GSMG0026139	Pkn2	protein kinase N2	985.358	1008.66	0.0334947	0.916622
ENSMUSG00000004610	GSMG0034390	Etfb	electron transferring flavoprotein, beta polypeptide	2044.48	2078.16	0.0236523	0.939631
ENSMUSG00000004626	GSMG0036951	Stxbp2	syntaxin binding protein 2	2432.36	2217.17	-0.132987	0.603109
ENSMUSG00000004631	GSMG0032695	Sgce	sarcoglycan, epsilon	1087.8	730.999	-0.572221	0.00264248
ENSMUSG00000004633	GSMG0031911	Chn2	chimerin 2	377.72	535.573	0.50528	0.0274632
ENSMUSG00000004637	GSMG0037844	Wwox	WW domain-containing oxidoreductase	216.078	154.606	-0.478685	0.0896407
ENSMUSG00000004642	GSMG0030359	Slbp	stem-loop binding protein	946.821	680.866	-0.47637	0.0763203
ENSMUSG00000004661	GSMG0040832	Arid3b	AT rich interactive domain 3B (BRIGHT-like)	288.7	283.739	-0.0233654	0.953168
ENSMUSG00000004665	GSMG0003243	Cnn2	calponin 2	4621.44	5573.74	0.270442	0.139727
ENSMUSG00000004667	GSMG0004325	Polr2e	polymerase (RNA) II (DNA directed) polypeptide E	1901.62	1858.93	-0.0323703	0.908538
ENSMUSG00000004677	GSMG0037412	Myo9b	myosin IXb	708.395	581.194	-0.28647	0.280612
ENSMUSG00000004698	GSMG0008798	Hdac9	histone deacetylase 9	499.438	463.659	-0.105043	0.717959
ENSMUSG00000004748	GSMG0006267	Mtfp1	mitochondrial fission process 1	50.4498	133.122	1.39678	3.96287e-06
ENSMUSG00000004768	GSMG0000116	Rab23	RAB23, member RAS oncogene family	202.517	170.595	-0.251176	0.431961
ENSMUSG00000004771	GSMG0040918	Rab11a	RAB11A, member RAS oncogene family	6722.36	6766.37	0.00944327	0.974257
ENSMUSG00000004788	GSMG0008331	Eif2b2	eukaryotic translation initiation factor 2B, subunit 2 beta	1037.37	843.808	-0.297018	0.116585
ENSMUSG00000004789	GSMG0008330	Dlst	dihydrolipoamide S-succinyltransferase (E2 component of 2-oxo-glutarate complex)	1589.92	1503.97	-0.0791344	0.766042
ENSMUSG00000004791	GSMG0009128	Pgf	placental growth factor	284.652	375.926	0.402946	0.168468
ENSMUSG00000004798	GSMG0006777	Ulk2	unc-51 like kinase 2	2426.53	2264.44	-0.0995302	0.71036
ENSMUSG00000004815	GSMG0030886	Dgkq	diacylglycerol kinase, theta	472.969	478.132	0.0159598	0.974641
ENSMUSG00000004837	GSMG0005310	Grap	GRB2-related adaptor protein	6207.26	7222.24	0.218538	0.252019
ENSMUSG00000004843	GSMG0015900	Chmp2b	charged multivesicular body protein 2B	2317.9	2057.33	-0.172235	0.47942
ENSMUSG00000004846	GSMG0029927	Plod3	procollagen-lysine, 2-oxoglutarate 5-dioxygenase 3	2307.45	2192.72	-0.0729316	0.777003
ENSMUSG00000004849	GSMG0031227	Ap1s1	adaptor protein complex AP-1, sigma 1	2987	2095.21	-0.5117	0.00172517
ENSMUSG00000004865	GSMG0017314	Srpk1	serine/arginine-rich protein specific kinase 1	802.549	710.053	-0.175827	0.451103
ENSMUSG00000004880	GSMG0002572	Lbr	lamin B receptor	1770.02	1378.17	-0.360338	0.0891871
ENSMUSG00000004885	GSMG0024504	Crabp2	cellular retinoic acid binding protein II	137.559	102.42	-0.422164	0.236667
ENSMUSG00000004891	GSMG0024505	Nes	nestin	8645.15	9490.88	0.134551	0.607835
ENSMUSG00000004892	GSMG0025609	Bcan	brevican	2157.87	2709.51	0.328668	0.20444
ENSMUSG00000004894	GSMG0025610	Hapln2	hyaluronan and proteoglycan link protein 2	12.5869	91.8045	2.85464	3.66827e-11
ENSMUSG00000004895	GSMG0025607	Prcc	papillary renal cell carcinoma (translocation-associated)	147.91	106.26	-0.471339	0.181667
ENSMUSG00000004896	GSMG0025608	Rrnad1	ribosomal RNA adenine dimethylase domain containing 1	216.34	252.282	0.22169	0.47433
ENSMUSG00000004897	GSMG0024501	Hdgf	hepatoma-derived growth factor	1706.65	1418.25	-0.266756	0.172298
ENSMUSG00000004902	GSMG0032414	Slc25a18	solute carrier family 25 (mitochondrial carrier), member 18	313.863	222.277	-0.493972	0.0336673
ENSMUSG00000004929	GSMG0003286	Thop1	thimet oligopeptidase 1	1197.01	965.44	-0.310316	0.117136
ENSMUSG00000004931	GSMG0003296	Apba3	amyloid beta (A4) precursor protein-binding, family A, member 3	1385.77	1861.38	0.426444	0.0110253
ENSMUSG00000004933	GSMG0003295	Matk	megakaryocyte-associated tyrosine kinase	6429.52	9153.46	0.50969	0.00263908
ENSMUSG00000004934	GSMG0004357	Pias4	protein inhibitor of activated STAT 4	515.388	531.219	0.0449801	0.894674
ENSMUSG00000004936	GSMG0040913	Map2k1	mitogen-activated protein kinase kinase 1	1457.94	1367.48	-0.0921239	0.73241
ENSMUSG00000004937	GSMG0004355	Sgta	small glutamine-rich tetratricopeptide repeat (TPR)-containing, alpha	2251.42	2024.86	-0.152717	0.512926
ENSMUSG00000004945	GSMG0017067	Tmem242	transmembrane protein 242	685.995	686.917	0.00285424	0.994933
ENSMUSG00000004947	GSMG0029914	Dtx2	deltex 2, E3 ubiquitin ligase	402.816	316.362	-0.350225	0.134179
ENSMUSG00000004952	GSMG0029917	Rasa4	RAS p21 protein activator 4	526.936	286.703	-0.881366	9.1472e-06
ENSMUSG00000004961	GSMG0035438	Syt5	synaptotagmin V	2304.01	1264.9	-0.865037	6.61274e-08
ENSMUSG00000004980	GSMG0033016	Hnrnpa2b1	heterogeneous nuclear ribonucleoprotein A2/B1	13718.7	10346.3	-0.407026	0.0185763
ENSMUSG00000004994	GSMG0038681	Ccdc130	coiled-coil domain containing 130	267.067	311.394	0.224399	0.423494
ENSMUSG00000004996	GSMG0038680	Mri1	methylthioribose-1-phosphate isomerase 1	436.221	330.075	-0.402533	0.0537044
ENSMUSG00000005034	GSMG0026171	Prkacb	protein kinase, cAMP dependent, catalytic, beta	1147.26	1096.04	-0.0659385	0.807068
ENSMUSG00000005043	GSMG0007713	Sgsh	N-sulfoglucosamine sulfohydrolase (sulfamidase)	137.958	134.25	-0.0376302	0.947816
ENSMUSG00000005045	GSMG0027442	Chd5	chromodomain helicase DNA binding protein 5	635.193	554.162	-0.199216	0.561169
ENSMUSG00000005054	GSMG0003209	Cstb	cystatin B	1708.14	1643.48	-0.056222	0.864885
ENSMUSG00000005057	GSMG0031215	Sh2b2	SH2B adaptor protein 2	214.874	120.702	-0.831409	0.0058693
ENSMUSG00000005069	GSMG0033656	Pex5	peroxisomal biogenesis factor 5	1034.37	1048.8	0.0197749	0.946112
ENSMUSG00000005078	GSMG0008160	Jkamp	JNK1/MAPK8-associated membrane protein	1167.87	1203.62	0.0441824	0.886462
ENSMUSG00000005089	GSMG0021475	Slc1a2	solute carrier family 1 (glial high affinity glutamate transporter), member 2	605.141	1873.2	1.63091	2.40002e-20
ENSMUSG00000005102	GSMG0021602	Eif2ak4	eukaryotic translation initiation factor 2 alpha kinase 4	1987.61	1870.89	-0.0875561	0.712192
ENSMUSG00000005103	GSMG0030411	Wdr1	WD repeat domain 1	8094.67	7485.44	-0.112678	0.628725
ENSMUSG00000005125	GSMG0014070	Ndrg1	N-myc downstream regulated gene 1	334.222	676.406	1.02014	1.37285e-06
ENSMUSG00000005142	GSMG0037558	Man2b1	mannosidase 2, alpha B1	1763.42	1551.83	-0.183912	0.447012
ENSMUSG00000005148	GSMG0011878	Klf5	Kruppel-like factor 5	223.276	194.213	-0.19746	0.558362
ENSMUSG00000005150	GSMG0038701	Wdr83	WD repeat domain containing 83	666.903	728.006	0.128126	0.629979
ENSMUSG00000005161	GSMG0037551	Prdx2	peroxiredoxin 2	3835.82	2443.61	-0.650019	0.000162413
ENSMUSG00000005198	GSMG0006879	Polr2a	polymerase (RNA) II (DNA directed) polypeptide A	1105.24	1055.83	-0.066946	0.887597
ENSMUSG00000005204	GSMG0006877	Senp3	SUMO/sentrin specific peptidase 3	656.955	512.816	-0.35728	0.142312
ENSMUSG00000005225	GSMG0031917	Plekha8	pleckstrin homology domain containing, family A (phosphoinositide binding specific) member 8	295.178	232.08	-0.345649	0.221805
ENSMUSG00000005233	GSMG0022932	Spc25	SPC25, NDC80 kinetochore complex component, homolog (S. cerevisiae)	662.693	303.512	-1.12726	3.96287e-06
ENSMUSG00000005262	GSMG0014760	Ufd1l	ubiquitin fusion degradation 1 like	1530.72	1260.76	-0.279531	0.121694
ENSMUSG00000005267	GSMG0006795	Zfp287	zinc finger protein 287	585.821	411.241	-0.506605	0.0432692
ENSMUSG00000005299	GSMG0030358	Letm1	leucine zipper-EF-hand containing transmembrane protein 1	1779.03	1531.92	-0.215375	0.277687
ENSMUSG00000005312	GSMG0010730	Ubqln1	ubiquilin 1	2534.08	2101.01	-0.270212	0.121333
ENSMUSG00000005338	GSMG0002484	Cadm3	cell adhesion molecule 3	400.225	284.022	-0.490919	0.0422397
ENSMUSG00000005354	GSMG0014205	Txn2	thioredoxin 2	2480.41	2500.82	0.0121645	0.96651
ENSMUSG00000005360	GSMG0013758	Slc1a3	solute carrier family 1 (glial high affinity glutamate transporter), member 3	5616.58	5146.15	-0.125991	0.544349
ENSMUSG00000005362	GSMG0033500	Crbn	cereblon	901.665	1021.59	0.18077	0.412023
ENSMUSG00000005370	GSMG0017034	Msh6	mutS homolog 6	1345.53	1044.55	-0.365923	0.036151
ENSMUSG00000005371	GSMG0017959	Fbxo11	F-box protein 11	239.845	192.894	-0.313724	0.25267
ENSMUSG00000005374	GSMG0029899	Tbl2	transducin (beta)-like 2	183.565	162.805	-0.17454	0.621839
ENSMUSG00000005378	GSMG0031193	Wbscr22	Williams Beuren syndrome chromosome region 22	898.738	825.217	-0.122015	0.647601
ENSMUSG00000005397	GSMG0009442	Nid1	nidogen 1	21466.8	15129.2	-0.504729	0.00508305
ENSMUSG00000005410	GSMG0037466	Mcm5	minichromosome maintenance complex component 5	1548.63	605.159	-1.35437	8.54146e-16
ENSMUSG00000005413	GSMG0037465	Hmox1	heme oxygenase 1	661.549	666.09	0.0109914	0.975053
ENSMUSG00000005417	GSMG0005268	Mprip	myosin phosphatase Rho interacting protein	10907.9	15672	0.522769	0.0681865
ENSMUSG00000005442	GSMG0060461	Cic	capicua transcriptional repressor	601.222	424.243	-0.505381	0.0752796
ENSMUSG00000005447	GSMG0035642	Pafah1b3	platelet-activating factor acetylhydrolase, isoform 1b, subunit 3	739.279	175.45	-2.07583	9.22098e-32
ENSMUSG00000005465	GSMG0038670	Il27ra	interleukin 27 receptor, alpha	317.014	228.195	-0.473494	0.0869671
ENSMUSG00000005469	GSMG0037527	Prkaca	protein kinase, cAMP dependent, catalytic, alpha	1655.66	1292.75	-0.357838	0.0392026
ENSMUSG00000005470	GSMG0037526	Asf1b	anti-silencing function 1B histone chaperone	397.037	164.288	-1.27133	7.95203e-07
ENSMUSG00000005481	GSMG0037524	Ddx39	DEAD (Asp-Glu-Ala-Asp) box polypeptide 39	3489.88	2593.51	-0.427802	0.00767499
ENSMUSG00000005483	GSMG0037521	Dnajb1	DnaJ heat shock protein family (Hsp40) member B1	841.539	818.088	-0.0413059	0.894448
ENSMUSG00000005501	GSMG0001871	Usp40	ubiquitin specific peptidase 40	561.008	485.967	-0.208856	0.397793
ENSMUSG00000005505	GSMG0021373	Kbtbd4	kelch repeat and BTB (POZ) domain containing 4	265.954	246.028	-0.114262	0.753672
ENSMUSG00000005506	GSMG0021375	Celf1	CUGBP, Elav-like family member 1	1309.62	1254.36	-0.0610943	0.838587
ENSMUSG00000005514	GSMG0029906	Por	P450 (cytochrome) oxidoreductase	2452.74	2515.38	0.036714	0.913447
ENSMUSG00000005533	GSMG0034600	Igf1r	insulin-like growth factor I receptor	5425.01	6514.56	0.263686	0.325337
ENSMUSG00000005534	GSMG0038028	Insr	insulin receptor	1774.14	2347.96	0.405219	0.0611415
ENSMUSG00000005566	GSMG0034032	Trim28	tripartite motif-containing 28	5069.08	3923.87	-0.369606	0.0512014
ENSMUSG00000005575	GSMG0035517	Ube2m	ubiquitin-conjugating enzyme E2M	950.943	1177.4	0.306917	0.374314
ENSMUSG00000005580	GSMG0015378	Adcy9	adenylate cyclase 9	96.7921	143.152	0.558933	0.205408
ENSMUSG00000005583	GSMG0009991	Mef2c	myocyte enhancer factor 2C	5494.26	2912.82	-0.914932	2.40085e-09
ENSMUSG00000005609	GSMG0035029	Ctr9	CTR9 homolog, Paf1/RNA polymerase II complex component	1499.45	1291.4	-0.215245	0.304868
ENSMUSG00000005610	GSMG0036528	Eif4g2	eukaryotic translation initiation factor 4, gamma 2	36735.1	27986.3	-0.39248	0.00659547
ENSMUSG00000005611	GSMG0036524	Mrvi1	MRV integration site 1	698.488	934.979	0.420827	0.0309279
ENSMUSG00000005615	GSMG0014888	Pcyt1a	phosphate cytidylyltransferase 1, choline, alpha isoform	544.505	554.092	0.0264281	0.941463
ENSMUSG00000005621	GSMG0034699	Zfp592	zinc finger protein 592	1044.52	997.729	-0.0665374	0.853488
ENSMUSG00000005625	GSMG0025728	Psmd4	proteasome (prosome, macropain) 26S subunit, non-ATPase, 4	3504.63	3262.78	-0.103144	0.644674
ENSMUSG00000005656	GSMG0008879	Snx6	sorting nexin 6	2398.33	2026.12	-0.243406	0.398676
ENSMUSG00000005667	GSMG0033242	Mthfd2	methylenetetrahydrofolate dehydrogenase (NAD+ dependent), methenyltetrahydrofolate cyclohydrolase	225.501	111.859	-1.00519	0.000269898
ENSMUSG00000005672	GSMG0029296	Kit	kit oncogene	2818.84	1333.94	-1.07887	2.30729e-14
ENSMUSG00000005674	GSMG0002445	Tomm40l	translocase of outer mitochondrial membrane 40 homolog-like (yeast)	169.888	188.179	0.149492	0.721326
ENSMUSG00000005677	GSMG0001038	Nr1i3	nuclear receptor subfamily 1, group I, member 3	324.726	338.253	0.0608334	0.862633
ENSMUSG00000005682	GSMG0003689	Pan2	PAN2 poly(A) specific ribonuclease subunit	1070.91	990.629	-0.111514	0.681271
ENSMUSG00000005683	GSMG0003691	Cs	citrate synthase	2665.77	2330.34	-0.19326	0.372215
ENSMUSG00000005686	GSMG0035028	Ampd3	adenosine monophosphate deaminase 3	250.39	327.506	0.384875	0.170164
ENSMUSG00000005687	GSMG0024755	Bcas2	breast carcinoma amplified sequence 2	2467.27	1882.33	-0.390799	0.0811405
ENSMUSG00000005698	GSMG0037724	Ctcf	CCCTC-binding factor	1879.77	1666.25	-0.174125	0.43214
ENSMUSG00000005699	GSMG0037730	Pard6a	par-6 family cell polarity regulator alpha	523.024	622.398	0.250192	0.284149
ENSMUSG00000005716	GSMG0014211	Pvalb	parvalbumin	1.61764	86.7136	5.75827	2.59185e-13
ENSMUSG00000005732	GSMG0015517	Ranbp1	RAN binding protein 1	4648.15	2775.19	-0.744333	0.000305719
ENSMUSG00000005774	GSMG0024639	Rfx5	regulatory factor X, 5 (influences HLA class II expression)	167.357	155.235	-0.107375	0.797344
ENSMUSG00000005779	GSMG0025721	Psmb4	proteasome (prosome, macropain) subunit, beta type 4	2284.33	1891.62	-0.271677	0.149303
ENSMUSG00000005802	GSMG0023456	Slc30a4	solute carrier family 30 (zinc transporter), member 4	226.786	255.643	0.174192	0.639625
ENSMUSG00000005803	GSMG0021703	Sqrdl	sulfide quinone reductase-like (yeast)	933.285	1044.96	0.163999	0.483335
ENSMUSG00000005804	GSMG0021702	Bloc1s6	biogenesis of lysosomal organelles complex-1, subunit 6, pallidin	1351.66	1034.44	-0.385906	0.0290365
ENSMUSG00000005813	GSMG0026116	Metap1	methionyl aminopeptidase 1	485.264	403.909	-0.264125	0.257958
ENSMUSG00000005823	GSMG0017722	Gpr108	G protein-coupled receptor 108	1213.48	1639.5	0.434679	0.00777203
ENSMUSG00000005846	GSMG0015446	Rsl1d1	ribosomal L1 domain containing 1	1570.57	1129.78	-0.475693	0.039387
ENSMUSG00000005871	GSMG0018205	Apc	adenomatosis polyposis coli	430.267	357.667	-0.26401	0.375318
ENSMUSG00000005873	GSMG0018820	Reep5	receptor accessory protein 5	5190.61	3807.69	-0.44738	0.0124675
ENSMUSG00000005881	GSMG0022048	Ergic3	ERGIC and golgi 3	4126.7	3468.01	-0.250438	0.194623
ENSMUSG00000005882	GSMG0023757	Uqcc1	ubiquinol-cytochrome c reductase complex assembly factor 1	282.242	258.597	-0.121618	0.737044
ENSMUSG00000005886	GSMG0060478	Ncoa2	nuclear receptor coactivator 2	207.133	175.362	-0.233382	0.593121
ENSMUSG00000005893	GSMG0032234	Nr2c2	nuclear receptor subfamily 2, group C, member 2	668.548	612.613	-0.124898	0.694666
ENSMUSG00000005897	GSMG0003424	Nr2c1	nuclear receptor subfamily 2, group C, member 1	325.461	331.062	0.0264827	0.943157
ENSMUSG00000005899	GSMG0014737	Smpd4	sphingomyelin phosphodiesterase 4	1101.52	1113.35	0.0153267	0.961731
ENSMUSG00000005907	GSMG0028785	Pex1	peroxisomal biogenesis factor 1	768.347	713.495	-0.106696	0.680966
ENSMUSG00000005936	GSMG0016450	Kctd20	potassium channel tetramerisation domain containing 20	1153.98	997.188	-0.210315	0.325098
ENSMUSG00000005949	GSMG0006948	Ctns	cystinosis, nephropathic	419.829	463.675	0.14451	0.59076
ENSMUSG00000005951	GSMG0005491	Shpk	sedoheptulokinase	58.6697	98.3858	0.743007	0.044563
ENSMUSG00000005958	GSMG0014786	Ephb3	Eph receptor B3	299.484	400.789	0.421178	0.144557
ENSMUSG00000005973	GSMG0023278	Rcn1	reticulocalbin 1	2050.94	1486.31	-0.464387	0.0169946
ENSMUSG00000005981	GSMG0015370	Trap1	TNF receptor-associated protein 1	751.402	651.999	-0.202141	0.476155
ENSMUSG00000005982	GSMG0014594	Naa60	N(alpha)-acetyltransferase 60, NatF catalytic subunit	1013.82	1067.45	0.0752048	0.79184
ENSMUSG00000005983	GSMG0015366	1700037C18Rik // Gm41410	RIKEN cDNA 1700037C18 gene // predicted gene, 41410	60.1142	49.9779	-0.257421	0.667427
ENSMUSG00000005986	GSMG0019931	Ankrd13d	ankyrin repeat domain 13 family, member D	589.61	569.243	-0.0502177	0.877158
ENSMUSG00000006005	GSMG0000876	Tpr	translocated promoter region, nuclear basket protein	2480.7	1972.48	-0.330707	0.113554
ENSMUSG00000006010	GSMG0002210	BC003331	cDNA sequence BC003331	647.496	607.811	-0.0916885	0.758857
ENSMUSG00000006019	GSMG0035535	Dhx34	DEAH (Asp-Glu-Ala-His) box polypeptide 34	1010.3	1070.9	0.0839867	0.793803
ENSMUSG00000006021	GSMG0034046	Kptn	kaptin	507.637	582.621	0.200147	0.424983
ENSMUSG00000006024	GSMG0034045	Napa	N-ethylmaleimide sensitive fusion protein attachment protein alpha	2272.97	2586.47	0.186848	0.323544
ENSMUSG00000006050	GSMG0018855	Sra1	steroid receptor RNA activator 1	1285.23	1440.27	0.164563	0.423011
ENSMUSG00000006058	GSMG0005818	Snf8	SNF8, ESCRT-II complex subunit, homolog (S. cerevisiae)	1073.58	932.271	-0.203954	0.308539
ENSMUSG00000006095	GSMG0035735	Tbcb	tubulin folding cofactor B	1373.35	1104.7	-0.313408	0.134681
ENSMUSG00000006127	GSMG0005533	Inpp5k	inositol polyphosphate 5-phosphatase K	2123.99	2454.76	0.209199	0.289087
ENSMUSG00000006134	GSMG0014732	Crkl	v-crk avian sarcoma virus CT10 oncogene homolog-like	2147.09	2020.52	-0.0876068	0.692508
ENSMUSG00000006169	GSMG0005092	Clint1	clathrin interactor 1	1613.83	1665.07	0.0455378	0.874782
ENSMUSG00000006191	GSMG0010489	Cdkal1	CDK5 regulatory subunit associated protein 1-like 1	714.627	685.467	-0.0599731	0.854817
ENSMUSG00000006205	GSMG0035240	Htra1	HtrA serine peptidase 1	1793.18	4023.26	1.1661	3.90511e-13
ENSMUSG00000006215	GSMG0027321	Zbtb17	zinc finger and BTB domain containing 17	1595.1	1505.94	-0.0833101	0.790429
ENSMUSG00000006218	GSMG0027319	Fam131c	family with sequence similarity 131, member C	102.268	12.152	-3.03268	3.32964e-13
ENSMUSG00000006219	GSMG0028589	Fblim1	filamin binding LIM protein 1	199.067	160.208	-0.315654	0.308363
ENSMUSG00000006235	GSMG0040459	Epor	erythropoietin receptor	512.694	331.574	-0.630903	0.00145356
ENSMUSG00000006241	GSMG0039229	Ccdc159	coiled-coil domain containing 159	348.916	309.885	-0.173069	0.654796
ENSMUSG00000006262	GSMG0029380	Mob1b	MOB kinase activator 1B	79.9486	72.0654	-0.149986	0.778971
ENSMUSG00000006273	GSMG0037353	Atp6v1b2	ATPase, H+ transporting, lysosomal V1 subunit B2	975.404	1001.79	0.0391737	0.900134
ENSMUSG00000006276	GSMG0038596	Eps15l1	epidermal growth factor receptor pathway substrate 15-like 1	2209.46	1901.2	-0.21726	0.331883
ENSMUSG00000006288	GSMG0012349	Ttc5	tetratricopeptide repeat domain 5	1221.03	1172.72	-0.0577254	0.834886
ENSMUSG00000006289	GSMG0012354	Osgep	O-sialoglycoprotein endopeptidase	836.913	809.172	-0.0473989	0.879253
ENSMUSG00000006299	GSMG0001752	Aamp	angio-associated migratory protein	2148.3	2068.13	-0.0541402	0.858234
ENSMUSG00000006301	GSMG0001754	Tmbim1	transmembrane BAX inhibitor motif containing 1	451.118	714.437	0.663616	9.34526e-05
ENSMUSG00000006304	GSMG0000417	Arpc2	actin related protein 2/3 complex, subunit 2	6317.22	4916	-0.361628	0.0240104
ENSMUSG00000006307	GSMG0035751	Kmt2b	lysine (K)-specific methyltransferase 2B	546.888	529.946	-0.0449228	0.902047
ENSMUSG00000006315	GSMG0035757	Tmem147	transmembrane protein 147	3096.6	2600.43	-0.25148	0.172066
ENSMUSG00000006333	GSMG0033942	Rps9	ribosomal protein S9	4030.51	2839.06	-0.505905	0.0152798
ENSMUSG00000006335	GSMG0035416	Tfpt	TCF3 (E2A) fusion partner	431.752	466.773	0.109925	0.717959
ENSMUSG00000006344	GSMG0003165	Ggt5	gamma-glutamyltransferase 5	445.596	669.346	0.588745	0.00288753
ENSMUSG00000006345	GSMG0003164	Ggt1	gamma-glutamyltransferase 1	168.066	277.39	0.722968	0.00376302
ENSMUSG00000006356	GSMG0008603	Crip2	cysteine rich protein 2	5453.72	6992.67	0.35872	0.0364288
ENSMUSG00000006360	GSMG0008604	Crip1	cysteine-rich protein 1 (intestinal)	543.879	1887.64	1.79464	1.98339e-19
ENSMUSG00000006362	GSMG0039026	Cbfa2t3	core-binding factor, runt domain, alpha subunit 2, translocated to, 3 (human)	481.903	678.666	0.492451	0.0626283
ENSMUSG00000006369	GSMG0013476	Fbln1	fibulin 1	1703.04	931.536	-0.869071	2.0673e-06
ENSMUSG00000006373	GSMG0041666	Pgrmc1	progesterone receptor membrane component 1	6840.72	5616.46	-0.284363	0.120647
ENSMUSG00000006378	GSMG0043737	Gcat	glycine C-acetyltransferase (2-amino-3-ketobutyrate-coenzyme A ligase)	120.059	72.8027	-0.721719	0.0370731
ENSMUSG00000006386	GSMG0026745	Tek	endothelial-specific receptor tyrosine kinase	11667.7	15114.5	0.3735	0.0426681
ENSMUSG00000006390	GSMG0026987	Elovl1	elongation of very long chain fatty acids (FEN1/Elo2, SUR4/Elo3, yeast)-like 1	1112.72	1473.38	0.405919	0.0371281
ENSMUSG00000006392	GSMG0026986	Med8	mediator complex subunit 8	906.03	680.876	-0.411023	0.0382978
ENSMUSG00000006395	GSMG0026985	Hyi	hydroxypyruvate isomerase (putative)	111.405	107.977	-0.0477707	0.927968
ENSMUSG00000006398	GSMG0028269	Cdc20	cell division cycle 20	1284.49	678.283	-0.919068	1.14162e-06
ENSMUSG00000006403	GSMG0001040	Adamts4	a disintegrin-like and metallopeptidase (reprolysin type) with thrombospondin type 1 motif, 4	229.293	429.432	0.904574	0.000738076
ENSMUSG00000006412	GSMG0001043	Pfdn2	prefoldin 2	925.009	691.123	-0.423121	0.0669147
ENSMUSG00000006418	GSMG0022193	Rnf114	ring finger protein 114	2107.05	2537.46	0.268402	0.150425
ENSMUSG00000006423	GSMG0042417	C330007P06Rik	RIKEN cDNA C330007P06 gene	1038.19	974.98	-0.0898809	0.793155
ENSMUSG00000006435	GSMG0019783	Neurl1a	neuralized E3 ubiquitin protein ligase 1A	163.897	293.776	0.843278	0.00134187
ENSMUSG00000006442	GSMG0027385	Srm	spermidine synthase	1622.74	941.502	-0.784885	1.04965e-07
ENSMUSG00000006445	GSMG0027317	Epha2	Eph receptor A2	253.37	281.605	0.151526	0.627588
ENSMUSG00000006456,ENSMUSG00000094936,ENSMUSG00000096370	GSMG0019947	Gm21992 // Rbm4 // Rbm14	predicted gene 21992 // RNA binding motif protein 4 // RNA binding motif protein 14	2198.82	1903.52	-0.207563	0.279836
ENSMUSG00000006463	GSMG0019284	Zdhhc24	zinc finger, DHHC domain containing 24	512.898	691.539	0.43298	0.0295687
ENSMUSG00000006464	GSMG0019956	Bbs1	Bardet-Biedl syndrome 1 (human)	63.8437	59.6782	-0.0907371	0.896246
ENSMUSG00000006471	GSMG0022523	Ndor1	NADPH dependent diflavin oxidoreductase 1	909.287	970.306	0.0941132	0.76624
ENSMUSG00000006476	GSMG0020779	Nsmf	NMDA receptor synaptonuclear signaling and neuronal migration factor	5713.91	6678.08	0.224988	0.313005
ENSMUSG00000006494	GSMG0021210	Pdk1	pyruvate dehydrogenase kinase, isoenzyme 1	428.016	524.91	0.296806	0.277036
ENSMUSG00000006498	GSMG0003235	Ptbp1	polypyrimidine tract binding protein 1	2594.55	2508.17	-0.0484934	0.867647
ENSMUSG00000006517	GSMG0039016	Mvd	mevalonate (diphospho) decarboxylase	613.589	286.225	-1.09733	5.31903e-09
ENSMUSG00000006519	GSMG0039015	Cyba	cytochrome b-245, alpha polypeptide	1994.89	1969.16	-0.0192809	0.954947
ENSMUSG00000006522	GSMG0012172	Itih3	inter-alpha trypsin inhibitor, heavy chain 3	228.846	511.174	1.162	4.11206e-08
ENSMUSG00000006526	GSMG0011382	Tmem110	transmembrane protein 110	424.063	377.118	-0.167477	0.540741
ENSMUSG00000006527	GSMG0011378	Sfmbt1	Scm-like with four mbt domains 1	391.623	353.576	-0.147741	0.626727
ENSMUSG00000006574	GSMG0007445	Slc4a1	solute carrier family 4 (anion exchanger), member 1	343.912	155.059	-1.15694	3.29977e-06
ENSMUSG00000006575	GSMG0005961	Rundc3a	RUN domain containing 3A	2359.3	3012.69	0.35229	0.136827
ENSMUSG00000006576	GSMG0000452	Slc4a3	solute carrier family 4 (anion exchanger), member 3	4772.46	5378.22	0.172262	0.620372
ENSMUSG00000006585	GSMG0037940	Cdt1	chromatin licensing and DNA replication factor 1	195.628	78.7539	-1.31852	5.49569e-07
ENSMUSG00000006586	GSMG0026296	Runx1t1	runt-related transcription factor 1%3B translocated to, 1 (cyclin D-related)	641.295	294.596	-1.11691	1.313e-07
ENSMUSG00000006589	GSMG0039022	Aprt	adenine phosphoribosyl transferase	1775.54	1064.37	-0.738234	3.37308e-06
ENSMUSG00000006599	GSMG0034498	Gtf2h1	general transcription factor II H, polypeptide 1	1009.69	922.891	-0.1295	0.580224
ENSMUSG00000006611	GSMG0010431	Hfe	hemochromatosis	495.034	416.135	-0.246653	0.3835
ENSMUSG00000006638	GSMG0029003	Abhd1	abhydrolase domain containing 1	310.33	386.095	0.313641	0.279977
ENSMUSG00000006641	GSMG0043514	Slc5a6	solute carrier family 5 (sodium-dependent vitamin transporter), member 6	1938.56	2997.89	0.62935	0.000139435
ENSMUSG00000006651	GSMG0035742	Aplp1	amyloid beta (A4) precursor-like protein 1	14131.7	9346.19	-0.596566	0.000271763
ENSMUSG00000006673	GSMG0040092	Qrich1	glutamine-rich 1	2540.44	2234.05	-0.185132	0.365735
ENSMUSG00000006675	GSMG0041305	P4htm	prolyl 4-hydroxylase, transmembrane (endoplasmic reticulum)	348.978	508.827	0.544009	0.0169017
ENSMUSG00000006676	GSMG0040090	Usp19	ubiquitin specific peptidase 19	3733.63	4497.66	0.268639	0.243382
ENSMUSG00000006678	GSMG0042676	Pola1	polymerase (DNA directed), alpha 1	272.812	167.208	-0.703109	0.00253826
ENSMUSG00000006699	GSMG0028532	Cdc42	cell division cycle 42	5565.84	4762.9	-0.224653	0.256773
ENSMUSG00000006705	GSMG0016489	Pknox1	Pbx/knotted 1 homeobox	385.575	336.582	-0.196624	0.459685
ENSMUSG00000006711	GSMG0009558	D130043K22Rik	RIKEN cDNA D130043K22 gene	700.317	962.935	0.459331	0.0304815
ENSMUSG00000006715	GSMG0010448	Gmnn	geminin	399.591	219.265	-0.863176	0.00100557
ENSMUSG00000006717	GSMG0010450	Acot13	acyl-CoA thioesterase 13	408.092	567.747	0.475268	0.0225286
ENSMUSG00000006720	GSMG0009509	Zfp184	zinc finger protein 184 (Kruppel-like)	72.6277	32.4962	-1.14025	0.0113658
ENSMUSG00000006728	GSMG0003642	Cdk4	cyclin-dependent kinase 4	3329.72	2048.18	-0.700556	1.22341e-05
ENSMUSG00000006731	GSMG0003647	B4galnt1	beta-1,4-N-acetyl-galactosaminyl transferase 1	1359.36	995.837	-0.449565	0.0337889
ENSMUSG00000006732	GSMG0003640	Mettl1	methyltransferase like 1	250.713	163.152	-0.623849	0.00967478
ENSMUSG00000006736	GSMG0004730	Tspan31	tetraspanin 31	4435.35	4221.49	-0.0713241	0.776211
ENSMUSG00000006740	GSMG0053004	Kif5b	kinesin family member 5B	2588.82	2681.62	0.0512125	0.876144
ENSMUSG00000006763	GSMG0035939	Saal1	serum amyloid A-like 1	341.214	291.014	-0.231604	0.383238
ENSMUSG00000006782	GSMG0005919	Cnp	2',3'-cyclic nucleotide 3' phosphodiesterase	656.261	1279.45	0.963668	2.44876e-08
ENSMUSG00000006800	GSMG0023897	Sulf2	sulfatase 2	1598.55	1176.2	-0.441987	0.0690027
ENSMUSG00000006818	GSMG0016246	Sod2	superoxide dismutase 2, mitochondrial	1782.09	1874.08	0.0729889	0.76624
ENSMUSG00000006850	GSMG0018259	Tmco6	transmembrane and coiled-coil domains 6	230.466	256.619	0.156665	0.625656
ENSMUSG00000006906	GSMG0033253	Stambp	STAM binding protein	662.188	511.249	-0.372612	0.0582427
ENSMUSG00000006920	GSMG0007414	Ezh1	enhancer of zeste 1 polycomb repressive complex 2 subunit	1151.37	1498.56	0.380933	0.0258828
ENSMUSG00000006930	GSMG0007387	Hap1	huntingtin-associated protein 1	531.409	1248.99	1.23283	0.103691
ENSMUSG00000006931	GSMG0007389	P3h4	prolyl 3-hydroxylase family member 4 (non-enzymatic)	625.032	550.377	-0.183241	0.475858
ENSMUSG00000006932	GSMG0040243	Ctnnb1	catenin (cadherin associated protein), beta 1	6415.52	7284.7	0.183577	0.479098
ENSMUSG00000006941	GSMG0040237	Eif1b	eukaryotic translation initiation factor 1B	2248.8	1601.16	-0.490706	0.0110222
ENSMUSG00000006958	GSMG0014785	Chrd	chordin	570.557	1116.67	0.969708	1.80117e-05
ENSMUSG00000006998	GSMG0014781	Psmd2	proteasome (prosome, macropain) 26S subunit, non-ATPase, 2	8570.9	7206.88	-0.249927	0.166668
ENSMUSG00000007021	GSMG0017231	Syngr3	synaptogyrin 3	2919.59	2121.83	-0.460345	0.0276325
ENSMUSG00000007029	GSMG0016572	Vars	valyl-tRNA synthetase	5071.75	2598.81	-0.964399	1.033e-07
ENSMUSG00000007036	GSMG0016578	Abhd16a	abhydrolase domain containing 16A	3382.17	3864.4	0.192413	0.378847
ENSMUSG00000007038	GSMG0016567	Neu1	neuraminidase 1	803.502	974.468	0.278774	0.240978
ENSMUSG00000007039	GSMG0016575	Ddah2	dimethylarginine dimethylaminohydrolase 2	1602.22	1321.27	-0.277459	0.167618
ENSMUSG00000007041	GSMG0016574	Clic1	chloride intracellular channel 1	4949.28	4760.73	-0.0558509	0.843994
ENSMUSG00000007050	GSMG0016571	Lsm2	LSM2 homolog, U6 small nuclear RNA and mRNA degradation associated	726.493	415.627	-0.807572	7.17267e-05
ENSMUSG00000007080	GSMG0029590	Pole	polymerase (DNA directed), epsilon	93.4315	50.1353	-0.888761	0.0156285
ENSMUSG00000007097	GSMG0002470	Atp1a2	ATPase, Na+/K+ transporting, alpha 2 polypeptide	9232.65	16145.2	0.806283	1.82447e-06
ENSMUSG00000007207	GSMG0029896	Stx1a	syntaxin 1A (brain)	1973.11	1538.43	-0.358394	0.0269686
ENSMUSG00000007279	GSMG0036503	Scube2	signal peptide, CUB domain, EGF-like 2	120.48	312.647	1.3767	1.60537e-05
ENSMUSG00000007338	GSMG0020004	Mrpl49	mitochondrial ribosomal protein L49	1122.25	1115.12	-0.00854491	0.978806
ENSMUSG00000007379	GSMG0024754	Dennd2c	DENN/MADD domain containing 2C	377.336	231.944	-0.698078	0.00129162
ENSMUSG00000007411	GSMG0008577	Mark3	MAP/microtubule affinity regulating kinase 3	5391.14	5785.2	0.10167	0.684014
ENSMUSG00000007415	GSMG0043520	Gatad1	GATA zinc finger domain containing 1	691.355	661.13	-0.0672359	0.848099
ENSMUSG00000007440,ENSMUSG00000023036,ENSMUSG00000102222,ENSMUSG00000102312,ENSMUSG00000102428,ENSMUSG00000102440,ENSMUSG00000102543,ENSMUSG00000102697,ENSMUSG00000102742,ENSMUSG00000102748,ENSMUSG00000102836,ENSMUSG00000102918,ENSMUSG00000103037,ENSMUSG00000103081,ENSMUSG00000103088,ENSMUSG00000103092,ENSMUSG00000103144,ENSMUSG00000103255,ENSMUSG00000103310,ENSMUSG00000103332,ENSMUSG00000103442,…	GSMG0018295	Pcdha1 // Pcdha2 // Pcdha3 // Gm37013 // Pcdha4 // Pcdha5 // Gm38666 // Pcdha6 // Gm38667 // Pcdha7 // Pcdha8 // Pcdha9 // Pcdha10 // Pcdha11 // Pcdha12 // Pcdhac1 // Pcdhac2 // Pcdhga1 // Pcdhga2 // Pcdhga3 // Pcdhgb1 // Pcdhga4 // Pcdhgb2 // Pcdhga5 // Pcdhga6 // Pcdhga7 // Pcdhgb4 // Pcdhga8 // Pcdhgb5 // Pcdhga9 // Pcdhgb6 // Pcdhga10 // Pcdhgb7 // Pcdhga11 // Pcdhgb8 // Pcdhga12 // Pcdhgc3 /…	protocadherin alpha 1 // protocadherin alpha 2 // protocadherin alpha 3 // predicted gene, 37013 // protocadherin alpha 4 // protocadherin alpha 5 // predicted gene, 38666 // protocadherin alpha 6 // predicted gene, 38667 // protocadherin alpha 7 // protocadherin alpha 8 // protocadherin alpha 9 // protocadherin alpha 10 // protocadherin alpha 11 // protocadherin alpha 12 // protocadherin alpha s…	20620.6	13955.8	-0.563224	0.000253703
ENSMUSG00000007458	GSMG0032436	M6pr	mannose-6-phosphate receptor, cation dependent	2668.18	2470.62	-0.110348	0.675904
ENSMUSG00000007476,ENSMUSG00000079484	GSMG0020887	Lrrc8a // Phyhd1	leucine rich repeat containing 8A // phytanoyl-CoA dioxygenase domain containing 1	1827.26	2052.59	0.168699	0.598897
ENSMUSG00000007564	GSMG0016292	Ppp2r1a	protein phosphatase 2, regulatory subunit A, alpha	7335.7	6097.03	-0.266592	0.156015
ENSMUSG00000007570	GSMG0016438	Fance	Fanconi anemia, complementation group E	741.136	723.263	-0.0354229	0.918478
ENSMUSG00000007589	GSMG0012427	Tinf2	Terf1 (TRF1)-interacting nuclear factor 2	656.277	558.173	-0.232444	0.329039
ENSMUSG00000007603	GSMG0016829	Dus3l	dihydrouridine synthase 3-like (S. cerevisiae)	4890.77	4559.28	-0.101123	0.687606
ENSMUSG00000007610	GSMG0037422	Gtpbp3	GTP binding protein 3	392.993	541.194	0.461769	0.107991
ENSMUSG00000007613	GSMG0026539	Tgfbr1	transforming growth factor, beta receptor I	330.451	303.606	-0.122851	0.699567
ENSMUSG00000007617	GSMG0010051	Homer1	homer scaffolding protein 1	204.052	169.171	-0.270451	0.374248
ENSMUSG00000007653	GSMG0005055	Gabrb2	gamma-aminobutyric acid (GABA) A receptor, subunit beta 2	308.11	230.342	-0.415719	0.128185
ENSMUSG00000007655	GSMG0031520	Cav1	caveolin 1, caveolae protein	7472.12	9270.36	0.311191	0.219593
ENSMUSG00000007656	GSMG0043550	Arpp19	cAMP-regulated phosphoprotein 19	3309.75	3580.29	0.113156	0.669236
ENSMUSG00000007659	GSMG0023716	Bcl2l1	BCL2-like 1	1183.59	1508.12	0.349493	0.0945583
ENSMUSG00000007670	GSMG0017713	Khsrp	KH-type splicing regulatory protein	712.947	651.967	-0.130821	0.781886
ENSMUSG00000007682	GSMG0009166	Dio2	deiodinase, iodothyronine, type II	410.377	643.917	0.649899	0.000618437
ENSMUSG00000007721	GSMG0038568	Ccdc124	coiled-coil domain containing 124	1951.94	1451.28	-0.42784	0.0211703
ENSMUSG00000007739	GSMG0004945	Cct4	chaperonin containing Tcp1, subunit 4 (delta)	3558.09	2746.32	-0.373345	0.0456472
ENSMUSG00000007777	GSMG0006638	0610009B22Rik	RIKEN cDNA 0610009B22 gene	542.918	546.928	0.00851987	0.984539
ENSMUSG00000007783	GSMG0035881	Cpt1c	carnitine palmitoyltransferase 1c	3020.19	3649.34	0.273079	0.207314
ENSMUSG00000007812	GSMG0030046	Zfp655	zinc finger protein 655	880.854	934.131	0.0836463	0.76914
ENSMUSG00000007815	GSMG0040082	Rhoa	ras homolog family member A	12976.8	13239.5	0.0288949	0.92838
ENSMUSG00000007817	GSMG0011324	Zmiz1	zinc finger, MIZ-type containing 1	1628.96	1465.74	-0.152559	0.630698
ENSMUSG00000007827	GSMG0033587	Ankrd26	ankyrin repeat domain 26	148.72	122.189	-0.276567	0.486707
ENSMUSG00000007833	GSMG0035895	Aldh16a1	aldehyde dehydrogenase 16 family, member A1	246.914	262.894	0.0901849	0.803746
ENSMUSG00000007836	GSMG0010728	Hnrnpa0	heterogeneous nuclear ribonucleoprotein A0	675.229	414.883	-0.707366	0.00259525
ENSMUSG00000007837	GSMG0035888	Prrg2	proline-rich Gla (G-carboxyglutamic acid) polypeptide 2	482.74	633.617	0.390567	0.0543217
ENSMUSG00000007850	GSMG0005142	Hnrnph1	heterogeneous nuclear ribonucleoprotein H1	2915.62	2267.23	-0.362015	0.0801424
ENSMUSG00000007867	GSMG0008343	Ift43	intraflagellar transport 43	579.194	673.089	0.215687	0.414834
ENSMUSG00000007872	GSMG0027236	Id3	inhibitor of DNA binding 3	8938.07	11740.8	0.393398	0.0293174
ENSMUSG00000007880	GSMG0028474	Arid1a	AT rich interactive domain 1A (SWI-like)	870.692	815.703	-0.0951281	0.803026
ENSMUSG00000007888	GSMG0037385	Crlf1	cytokine receptor-like factor 1	525.402	187.667	-1.48826	1.13413e-12
ENSMUSG00000007891	GSMG0036890	Ctsd	cathepsin D	7714.25	10889.2	0.497459	0.00779382
ENSMUSG00000007892	GSMG0040878	Rplp1	ribosomal protein, large, P1	2612.86	2266.56	-0.205892	0.432529
ENSMUSG00000007908	GSMG0039822	Hmgcll1	3-hydroxymethyl-3-methylglutaryl-Coenzyme A lyase-like 1	75.5072	49.6836	-0.606788	0.174846
ENSMUSG00000007944	GSMG0034219	Ttc9b	tetratricopeptide repeat domain 9B	575.613	670.884	0.218763	0.443244
ENSMUSG00000007950	GSMG0038576	Abhd8	abhydrolase domain containing 8	1111.08	1262.14	0.18331	0.505637
ENSMUSG00000007987	GSMG0029922	Ift22	intraflagellar transport 22	294.624	267.308	-0.139394	0.667348
ENSMUSG00000007989	GSMG0012548	Fzd3	frizzled class receptor 3	342.014	287.104	-0.247516	0.426309
ENSMUSG00000008035	GSMG0041597	Mid1ip1	Mid1 interacting protein 1 (gastrulation specific G12-like (zebrafish))	1547.43	1603.32	0.051554	0.855903
ENSMUSG00000008036	GSMG0034059	Ap2s1	adaptor-related protein complex 2, sigma 1 subunit	2725.34	2252.06	-0.275633	0.167194
ENSMUSG00000008090	GSMG0029573	Fgfrl1	fibroblast growth factor receptor-like 1	126.682	151.983	0.259771	0.561141
ENSMUSG00000008136	GSMG0001534	Fhl2	four and a half LIM domains 2	160.554	218.79	0.448575	0.138715
ENSMUSG00000008140	GSMG0035864	Emc10	ER membrane protein complex subunit 10	1828.37	1507.4	-0.27955	0.160384
ENSMUSG00000008153	GSMG0033657	Clstn3	calsyntenin 3	2197.26	2343.18	0.0931725	0.797344
ENSMUSG00000008167	GSMG0037555	Fbxw9	F-box and WD-40 domain protein 9	1071.32	973.674	-0.137533	0.586498
ENSMUSG00000008200	GSMG0021368	Fnbp4	formin binding protein 4	1308.61	1174.06	-0.156512	0.51548
ENSMUSG00000008206	GSMG0036965	Cers4	ceramide synthase 4	1708.11	2045.37	0.26071	0.176871
ENSMUSG00000008226	GSMG0021227	Scrn3	secernin 3	66.8516	111.319	0.731727	0.0466307
ENSMUSG00000008301	GSMG0018420	Phax	phosphorylated adaptor for RNA export	1090.39	912.063	-0.257547	0.191567
ENSMUSG00000008305	GSMG0027935	Tle1	transducin-like enhancer of split 1	1619.61	1814.33	0.163885	0.441934
ENSMUSG00000008333	GSMG0021882	Snrpb2	U2 small nuclear ribonucleoprotein B	720.13	548.56	-0.39371	0.189773
ENSMUSG00000008373	GSMG0033938	Prpf31	pre-mRNA processing factor 31	1418.01	1140.59	-0.313598	0.107889
ENSMUSG00000008384	GSMG0034213	Sertad1	SERTA domain containing 1	697.548	1362.64	0.96505	2.84921e-08
ENSMUSG00000008393	GSMG0015417	Carhsp1	calcium regulated heat stable protein 1	2611.26	2339.02	-0.15854	0.439633
ENSMUSG00000008398	GSMG0004472	Elk3	ELK3, member of ETS oncogene family	880.588	606.854	-0.53717	0.00957046
ENSMUSG00000008429	GSMG0040492	Herpud2	HERPUD family member 2	1714.28	1992.74	0.216728	0.276862
ENSMUSG00000008435	GSMG0035432	Rdh13	retinol dehydrogenase 13 (all-trans and 9-cis)	271.75	276.069	0.0242855	0.949211
ENSMUSG00000008475	GSMG0000892	Arpc5	actin related protein 2/3 complex, subunit 5	8268.41	6069.22	-0.446269	0.0424749
ENSMUSG00000008489	GSMG0028061	Elavl2	ELAV (embryonic lethal, abnormal vision, Drosophila)-like 2 (Hu antigen B)	374.294	259.127	-0.533913	0.0173954
ENSMUSG00000008496	GSMG0035636	Pou2f2	POU domain, class 2, transcription factor 2	175.858	159.574	-0.146207	0.762252
ENSMUSG00000008540	GSMG0032595	Mgst1	microsomal glutathione S-transferase 1	303.443	334.303	0.140674	0.720846
ENSMUSG00000008575	GSMG0027989	Nfib	nuclear factor I/B	3013.6	2498.73	-0.269834	0.114453
ENSMUSG00000008604	GSMG0024520	Ubqln4	ubiquilin 4	479.028	405.581	-0.242108	0.331601
ENSMUSG00000008658	GSMG0014618	Rbfox1	RNA binding protein, fox-1 homolog (C. elegans) 1	555.843	634.71	0.192012	0.402895
ENSMUSG00000008683	GSMG0036566	Rps15a	ribosomal protein S15A	1034.9	631.201	-0.714073	0.000165612
ENSMUSG00000008690	GSMG0013522	Ncaph2	non-SMC condensin II complex, subunit H2	2554.94	2434.39	-0.0690129	0.806117
ENSMUSG00000008730	GSMG0025834	Hipk1	homeodomain interacting protein kinase 1	674.832	957.239	0.503644	0.138375
ENSMUSG00000008734	GSMG0036581	Gprc5b	G protein-coupled receptor, family C, group 5, member B	148.572	254.862	0.779042	0.0017332
ENSMUSG00000008763	GSMG0025808	Man1a2	mannosidase, alpha, class 1A, member 2	870.353	828.456	-0.0705593	0.807624
ENSMUSG00000008822	GSMG0009130	Acyp1	acylphosphatase 1, erythrocyte (common) type	222.354	260.397	0.224908	0.593685
ENSMUSG00000008855	GSMG0007440	Hdac5	histone deacetylase 5	2019.27	2378.44	0.236561	0.360396
ENSMUSG00000008859	GSMG0010358	Rala	v-ral simian leukemia viral oncogene A (ras related)	2011.64	1360.76	-0.56446	0.00033207
ENSMUSG00000008958	GSMG0024644	Vps72	vacuolar protein sorting 72	1272.76	878.437	-0.533649	0.00185394
ENSMUSG00000008976	GSMG0015252	Gabpa	GA repeat binding protein, alpha	932.287	764.844	-0.28545	0.132259
ENSMUSG00000008999	GSMG0023963	Bmp7	bone morphogenetic protein 7	282.301	268.02	-0.0707606	0.87613
ENSMUSG00000009013	GSMG0030972	Dynll1	dynein light chain LC8-type 1	6073.54	6057.83	-0.00391216	0.990709
ENSMUSG00000009030	GSMG0022708	Pdcl	phosducin-like	1779.84	1662.48	-0.0985916	0.718241
ENSMUSG00000009035	GSMG0014246	Tmem184b	transmembrane protein 184b	6332.51	7078.39	0.160585	0.468674
ENSMUSG00000009073	GSMG0006281	Nf2	neurofibromatosis 2	1433.45	1307.49	-0.132269	0.575733
ENSMUSG00000009076	GSMG0004841	Zmat5	zinc finger, matrin type 5	502.03	442.063	-0.185191	0.545645
ENSMUSG00000009079	GSMG0006286	Ewsr1	Ewing sarcoma breakpoint region 1	9150.78	8912.72	-0.0378858	0.894035
ENSMUSG00000009090	GSMG0004848	Ap1b1	adaptor protein complex AP-1, beta 1 subunit	2956.25	2778.88	-0.08882	0.740983
ENSMUSG00000009097	GSMG0015522	Tbx1	T-box 1	850.524	1215.29	0.51366	0.0032073
ENSMUSG00000009112	GSMG0032415	Bcl2l13	BCL2-like 13 (apoptosis facilitator)	240.032	199.89	-0.266683	0.419418
ENSMUSG00000009207	GSMG0022990	Lnp	limb and neural patterns	282.252	180.369	-0.649117	0.00515201
ENSMUSG00000009216	GSMG0022578	Fam163b	family with sequence similarity 163, member B	939.968	1154.9	0.297729	0.193294
ENSMUSG00000009281	GSMG0032992	Rarres2	retinoic acid receptor responder (tazarotene induced) 2	614.946	990.915	0.688473	0.000230851
ENSMUSG00000009291	GSMG0003195	Pttg1ip	pituitary tumor-transforming 1 interacting protein	10782.6	13434.4	0.317345	0.0617226
ENSMUSG00000009292	GSMG0004290	Trpm2	transient receptor potential cation channel, subfamily M, member 2	129.784	246.661	0.92533	0.00244249
ENSMUSG00000009293	GSMG0003197	Ube2g2	ubiquitin-conjugating enzyme E2G 2	1466.18	1585.73	0.113864	0.651404
ENSMUSG00000009376	GSMG0031521	Met	met proto-oncogene	796.921	273.097	-1.53936	8.72915e-15
ENSMUSG00000009378	GSMG0020325	Slc16a12	solute carrier family 16 (monocarboxylic acid transporters), member 12	545.217	569.098	0.0634753	0.846371
ENSMUSG00000009394	GSMG0032350	Syn2	synapsin II	699.77	1028.49	0.555066	0.00188644
ENSMUSG00000009406	GSMG0042396	Elk1	ELK1, member of ETS oncogene family	400.268	450.636	0.170058	0.557829
ENSMUSG00000009418	GSMG0043660	Nav1	neuron navigator 1	2101.62	1214.25	-0.791884	0.00033389
ENSMUSG00000009470	GSMG0011010	Tnpo1	transportin 1	729.675	613.18	-0.250059	0.346323
ENSMUSG00000009535	GSMG0018551	Rnmt	RNA (guanine-7-) methyltransferase	954.453	696.822	-0.45392	0.0530631
ENSMUSG00000009545	GSMG0035382	Kcnq1	potassium voltage-gated channel, subfamily Q, member 1	1113.3	792.797	-0.489387	0.00254419
ENSMUSG00000009549	GSMG0023379	Srp14	signal recognition particle 14	3036.36	3173.92	0.0637995	0.810441
ENSMUSG00000009555	GSMG0022646	Cdk9	cyclin-dependent kinase 9 (CDC2-related kinase)	995.887	1257.15	0.335738	0.0857852
ENSMUSG00000009563	GSMG0020931	Tor2a	torsin family 2, member A	1983.64	1767.24	-0.166736	0.383628
ENSMUSG00000009566	GSMG0022645	Fpgs	folylpolyglutamyl synthetase	815.531	445.474	-0.870175	3.14052e-06
ENSMUSG00000009569	GSMG0014686	Mkl2	MKL/myocardin-like 2	1767.08	2345.07	0.408641	0.0143937
ENSMUSG00000009575	GSMG0014572	Cbx5	chromobox 5	1992.88	1365.72	-0.544814	0.00033207
ENSMUSG00000009585	GSMG0013386	Apobec3	apolipoprotein B mRNA editing enzyme, catalytic polypeptide 3	426.856	411.819	-0.0516034	0.880474
ENSMUSG00000009614	GSMG0022580	Sardh	sarcosine dehydrogenase	393.754	385.344	-0.0298411	0.934324
ENSMUSG00000009621	GSMG0022581	Vav2	vav 2 oncogene	460.969	334.153	-0.464399	0.130158
ENSMUSG00000009630	GSMG0037173	Ppp2cb	protein phosphatase 2 (formerly 2A), catalytic subunit, beta isoform	612.345	997.518	0.703599	0.0189844
ENSMUSG00000009633	GSMG0002657	G0s2	G0/G1 switch gene 2	259.04	520.16	1.00733	7.95203e-07
ENSMUSG00000009640	GSMG0028256	Dmap1	DNA methyltransferase 1-associated protein 1	1336.85	1145.41	-0.22207	0.261629
ENSMUSG00000009647	GSMG0004123	Mcu	mitochondrial calcium uniporter	1112.85	761.532	-0.546856	0.000626665
ENSMUSG00000009681	GSMG0003156	Bcr	breakpoint cluster region	794.541	715.65	-0.150583	0.570632
ENSMUSG00000009687	GSMG0035768	Fxyd5	FXYD domain-containing ion transport regulator 5	2281.8	3297.31	0.531389	0.000461479
ENSMUSG00000009731	GSMG0041565	Kcnd1	potassium voltage-gated channel, Shal-related family, member 1	69.7899	40.0837	-0.790801	0.12742
ENSMUSG00000009733	GSMG0014512	Tfcp2	transcription factor CP2	370.896	376.656	0.0203052	0.95787
ENSMUSG00000009739	GSMG0014513	Pou6f1	POU domain, class 6, transcription factor 1	111.316	112.535	0.0205595	0.971802
ENSMUSG00000009741	GSMG0040174	Ubp1	upstream binding protein 1	908.857	925.5	0.0248062	0.9396
ENSMUSG00000009772	GSMG0000768	Nuak2	NUAK family, SNF1-like kinase, 2	43.6867	59.6204	0.461573	0.44241
ENSMUSG00000009828	GSMG0039836	Ick	intestinal cell kinase	464.085	466.2	0.00682141	0.985238
ENSMUSG00000009863	GSMG0027305	Sdhb	succinate dehydrogenase complex, subunit B, iron sulfur (Ip)	3602.48	3050.56	-0.239554	0.18187
ENSMUSG00000009876	GSMG0021984	Cox4i2	cytochrome c oxidase subunit IV isoform 2	519.225	655.839	0.33728	0.105168
ENSMUSG00000009894	GSMG0006731	Snap47	synaptosomal-associated protein, 47	3164.64	2551.75	-0.310547	0.10362
ENSMUSG00000009905	GSMG0001962	Kdsr	3-ketodihydrosphingosine reductase	690.255	700.987	0.0234836	0.942194
ENSMUSG00000009907	GSMG0001963	Vps4b	vacuolar protein sorting 4B	1442.77	1502.9	0.0589395	0.851551
ENSMUSG00000009995	GSMG0041854	Taz	tafazzin	1272.6	1279.06	0.00824403	0.978892
ENSMUSG00000010025	GSMG0006766	Aldh3a2	aldehyde dehydrogenase family 3, subfamily A2	887.696	947.412	0.0949009	0.739254
ENSMUSG00000010045	GSMG0040054	Tmem115	transmembrane protein 115	1363.47	1367.22	0.00436508	0.987768
ENSMUSG00000010047	GSMG0040059	Hyal2	hyaluronoglucosaminidase 2	1626.55	1609.15	-0.015159	0.9608
ENSMUSG00000010048	GSMG0040061	Ifrd2	interferon-related developmental regulator 2	416.631	279.075	-0.578693	0.00866388
ENSMUSG00000010051,ENSMUSG00000079334	GSMG0043555	Hyal1 // Nat6	hyaluronoglucosaminidase 1 // N-acetyltransferase 6	628.853	871.551	0.471401	0.00559109
ENSMUSG00000010054	GSMG0040058	Tusc2	tumor suppressor candidate 2	1806.76	1817.84	0.00844753	0.976846
ENSMUSG00000010057	GSMG0040055	Nprl2	nitrogen permease regulator-like 2	1221.19	1306.04	0.0982026	0.713384
ENSMUSG00000010064	GSMG0041281	Slc38a3	solute carrier family 38, member 3	11390.6	11868.2	0.0594236	0.833703
ENSMUSG00000010067	GSMG0040057	Rassf1	Ras association (RalGDS/AF-6) domain family member 1	795.293	1101.43	0.470061	0.0070152
ENSMUSG00000010086	GSMG0006769	Rnf112	ring finger protein 112	1460.2	4528.34	1.63295	3.13418e-25
ENSMUSG00000010095	GSMG0020062	Slc3a2	solute carrier family 3 (activators of dibasic and neutral amino acid transport), member 2	7707.96	5050.76	-0.609739	4.86616e-05
ENSMUSG00000010097	GSMG0019370	Nxf1 // Tmem223	nuclear RNA export factor 1 // transmembrane protein 223	4073.73	4830.76	0.246017	0.156879
ENSMUSG00000010110	GSMG0019368	Stx5a	syntaxin 5A	2034.24	2310.67	0.183951	0.323787
ENSMUSG00000010154	GSMG0037962	Spire2	spire homolog 2 (Drosophila)	458.018	253.052	-0.857045	1.09897e-05
ENSMUSG00000010205,ENSMUSG00000079677,ENSMUSG00000079681,ENSMUSG00000111497	GSMG0040432	Zglp1 // Gm38431 // Fdx1l // Raver1	zinc finger, GATA-like protein 1 // predicted gene, 38431 // ferredoxin 1-like // ribonucleoprotein, PTB-binding 1	1172.78	1008.37	-0.219115	0.42385
ENSMUSG00000010277	GSMG0005589	2610507B11Rik	RIKEN cDNA 2610507B11 gene	3343.29	3070.15	-0.122847	0.667873
ENSMUSG00000010290	GSMG0000200	AI597479	expressed sequence AI597479	134.547	155.549	0.208749	0.55917
ENSMUSG00000010307	GSMG0034502	Tmem86a	transmembrane protein 86A	2066.19	1728.19	-0.257943	0.1291
ENSMUSG00000010358	GSMG0005945	Ifi35	interferon-induced protein 35	76.5057	95.1219	0.313507	0.466599
ENSMUSG00000010362	GSMG0005949	Rdm1	RAD52 motif 1	364.181	442.26	0.280001	0.383997
ENSMUSG00000010376	GSMG0012425	Nedd8	neural precursor cell expressed, developmentally down-regulated gene 8	2800.76	2288.56	-0.291152	0.145127
ENSMUSG00000010392	GSMG0007013	Gosr1	golgi SNAP receptor complex member 1	454.605	408.951	-0.150904	0.573512
ENSMUSG00000010406	GSMG0011569	Mrpl52	mitochondrial ribosomal protein L52	956.486	688.807	-0.476224	0.10802
ENSMUSG00000010453	GSMG0001466	Kansl3	KAT8 regulatory NSL complex subunit 3	1463.45	1663.79	0.184753	0.466202
ENSMUSG00000010517	GSMG0026902	Faf1	Fas-associated factor 1	2018.97	1953.11	-0.0475904	0.856989
ENSMUSG00000010529	GSMG0009334	Gm266	predicted gene 266	56.9831	185.337	1.69981	3.89657e-06
ENSMUSG00000010554	GSMG0005507	Mettl16	methyltransferase like 16	322.348	313.199	-0.039449	0.920255
ENSMUSG00000010607	GSMG0039237	Pigyl	phosphatidylinositol glycan anchor biosynthesis, class Y-like	797.921	777.263	-0.0391836	0.917149
ENSMUSG00000010608	GSMG0008296	Rbm25	RNA binding motif protein 25	6323.62	5990.24	-0.0781711	0.808632
ENSMUSG00000010609	GSMG0002553	Psen2	presenilin 2	210.662	244.477	0.217163	0.535758
ENSMUSG00000010660	GSMG0041430	Plcd1	phospholipase C, delta 1	1014	647.431	-0.645318	0.000617552
ENSMUSG00000010663	GSMG0019398	Fads1	fatty acid desaturase 1	2368.14	1903.71	-0.314679	0.0669147
ENSMUSG00000010721	GSMG0030297	Lmbr1	limb region 1	1260.48	975.764	-0.368758	0.0470792
ENSMUSG00000010751	GSMG0036917	Tnfrsf22	tumor necrosis factor receptor superfamily, member 22	579.688	538.316	-0.106769	0.717992
ENSMUSG00000010755	GSMG0036915	Cars	cysteinyl-tRNA synthetase	2970.08	2313.37	-0.360193	0.0206231
ENSMUSG00000010803	GSMG0006553	Gabra1	gamma-aminobutyric acid (GABA) A receptor, subunit alpha 1	266.377	405.328	0.606594	0.0143513
ENSMUSG00000010830	GSMG0013379	Kdelr3	KDEL (Lys-Asp-Glu-Leu) endoplasmic reticulum protein retention receptor 3	162.902	261.229	0.684081	0.00711991
ENSMUSG00000010911	GSMG0021478	Apip	APAF1 interacting protein	409.387	416.697	0.0288495	0.942194
ENSMUSG00000010914	GSMG0023242	Pdhx	pyruvate dehydrogenase complex, component X	811.199	685.003	-0.242501	0.324643
ENSMUSG00000010936	GSMG0037812	Vac14	Vac14 homolog (S. cerevisiae)	1762.95	1169.22	-0.592069	0.00013556
ENSMUSG00000011096	GSMG0034446	Akt1s1	AKT1 substrate 1 (proline-rich)	316.312	300.084	-0.079595	0.825242
ENSMUSG00000011114	GSMG0040584	Tbrg1	transforming growth factor beta regulated gene 1	2197.38	1875.18	-0.228693	0.240978
ENSMUSG00000011158	GSMG0009361	Brf1	BRF1, RNA polymerase III transcription initiation factor 90 kDa subunit	882.66	891.171	0.0151461	0.962415
ENSMUSG00000011179	GSMG0007863	Odc1	ornithine decarboxylase, structural 1	2216.7	1219.12	-0.861149	1.67484e-06
ENSMUSG00000011254	GSMG0006573	Thg1l	tRNA-histidine guanylyltransferase 1-like (S. cerevisiae)	57.64	34.6537	-0.726958	0.148915
ENSMUSG00000011256	GSMG0005094	Adam19	a disintegrin and metallopeptidase domain 19 (meltrin beta)	1286	709.577	-0.857591	2.50414e-06
ENSMUSG00000011306	GSMG0037366	Sugp1	SURP and G patch domain containing 1	956.692	897.045	-0.0936497	0.725916
ENSMUSG00000011427	GSMG0034284	Zfp790	zinc finger protein 790	789.788	997.484	0.335969	0.0650434
ENSMUSG00000011589	GSMG0016807	Fsd1	fibronectin type 3 and SPRY domain-containing protein	1681.44	1280.61	-0.392094	0.0267229
ENSMUSG00000011658	GSMG0034443	Fuz	fuzzy planar cell polarity protein	227.101	327.56	0.530602	0.0339611
ENSMUSG00000011751	GSMG0035671	Sptbn4	spectrin beta, non-erythrocytic 4	556.379	1114.78	1.00152	0.000116728
ENSMUSG00000011831	GSMG0030869	Evi5	ecotropic viral integration site 5	1163.55	1237.42	0.0902566	0.755311
ENSMUSG00000011832	GSMG0036957	Evi5l	ecotropic viral integration site 5 like	1432.92	1086.87	-0.398629	0.0700482
ENSMUSG00000011837	GSMG0036961	Snapc2	small nuclear RNA activating complex, polypeptide 2	795.703	701.418	-0.180394	0.476178
ENSMUSG00000011877	GSMG0005565	Git1	G protein-coupled receptor kinase-interactor 1	3656.38	5258.99	0.524177	0.0833931
ENSMUSG00000011884	GSMG0030957	Gltp	glycolipid transfer protein	1749.34	2595.84	0.569798	0.00131769
ENSMUSG00000011958	GSMG0039749	Bnip2	BCL2/adenovirus E1B interacting protein 2	3161.29	3843.19	0.281856	0.148246
ENSMUSG00000011960	GSMG0014470	Ccnt1	cyclin T1	1736.1	1654.11	-0.0693785	0.782548
ENSMUSG00000012017	GSMG0014740	Scarf2	scavenger receptor class F, member 2	524.277	660.524	0.332497	0.204483
ENSMUSG00000012076	GSMG0008087	Brms1l	breast cancer metastasis-suppressor 1-like	443.93	470.414	0.0861274	0.784775
ENSMUSG00000012114	GSMG0015507	Med15	mediator complex subunit 15	1371.01	1269.32	-0.111541	0.618746
ENSMUSG00000012117	GSMG0028479	Dhdds	dehydrodolichyl diphosphate synthase	687.441	681.589	-0.0122506	0.968407
ENSMUSG00000012126	GSMG0027201	Ubxn11	UBX domain protein 11	123.201	200.234	0.702228	0.0101273
ENSMUSG00000012296	GSMG0017593	Tjap1	tight junction associated protein 1	1086.27	1227.14	0.175334	0.392835
ENSMUSG00000012422	GSMG0010024	Tmem167	transmembrane protein 167	2169.31	2082.83	-0.0585052	0.82766
ENSMUSG00000012429	GSMG0009469	Mplkip	M-phase specific PLK1 intereacting protein	748.996	627.957	-0.253269	0.306051
ENSMUSG00000012443	GSMG0019640	Kif11	kinesin family member 11	838.702	318.307	-1.39383	1.63095e-08
ENSMUSG00000012483	GSMG0032721	Rpa3	replication protein A3	447.836	398.606	-0.168445	0.596828
ENSMUSG00000012519	GSMG0038929	Mlkl	mixed lineage kinase domain-like	212.2	235.131	0.148247	0.741527
ENSMUSG00000012535	GSMG0032807	Tnpo3	transportin 3	2584.79	2205.76	-0.228284	0.257963
ENSMUSG00000012609	GSMG0008340	Ttll5	tubulin tyrosine ligase-like family, member 5	107.972	111.486	0.0473526	0.928181
ENSMUSG00000012640	GSMG0035851	Zfp715	zinc finger protein 715	939.473	1007.69	0.102458	0.727703
ENSMUSG00000012848	GSMG0034028	Rps5	ribosomal protein S5	2626.05	1804.73	-0.540538	0.00154553
ENSMUSG00000013033	GSMG0037525	Adgrl1	adhesion G protein-coupled receptor L1	816.942	840.393	0.0395699	0.927835
ENSMUSG00000013076	GSMG0040363	Amotl1	angiomotin-like 1	396.683	391.047	-0.0240892	0.957835
ENSMUSG00000013089	GSMG0015569	Etv5	ets variant 5	324.939	304.174	-0.0944417	0.767461
ENSMUSG00000013150	GSMG0038851	Gfod2	glucose-fructose oxidoreductase domain containing 2	1466.81	1077.23	-0.444523	0.00656962
ENSMUSG00000013155	GSMG0038850	Enkd1	enkurin domain containing 1	309.373	261.127	-0.247252	0.386959
ENSMUSG00000013160	GSMG0038844	Atp6v0d1	ATPase, H+ transporting, lysosomal V0 subunit D1	2832.04	2695.11	-0.0714684	0.793008
ENSMUSG00000013236	GSMG0017694	Ptprs	protein tyrosine phosphatase, receptor type, S	5508.67	4197.5	-0.392073	0.12631
ENSMUSG00000013275	GSMG0000757	Slc41a1	solute carrier family 41, member 1	2635.24	2478.59	-0.0884025	0.757876
ENSMUSG00000013419	GSMG0040253	Zfp651	zinc finger protein 651	1284.91	1724.86	0.424694	0.0696678
ENSMUSG00000013465	GSMG0060621	Nelfb	negative elongation factor complex member B	3683.08	3715.7	0.0130035	0.962147
ENSMUSG00000013495	GSMG0029570	Tmem175	transmembrane protein 175	522.585	640.208	0.294569	0.182776
ENSMUSG00000013523	GSMG0023950	Bcas1	breast carcinoma amplified sequence 1	102.561	302.919	1.5651	4.97347e-11
ENSMUSG00000013539	GSMG0015519	Tango2	transport and golgi organization 2	421.026	517.859	0.299728	0.235944
ENSMUSG00000013584	GSMG0039772	Aldh1a2	aldehyde dehydrogenase family 1, subfamily A2	374.414	491.248	0.395626	0.179925
ENSMUSG00000013593	GSMG0002447	Ndufs2	NADH dehydrogenase (ubiquinone) Fe-S protein 2	5179.38	4539.83	-0.189884	0.316495
ENSMUSG00000013622	GSMG0029005	Atraid	all-trans retinoic acid induced differentiation factor	3538.83	3417.84	-0.0499932	0.851443
ENSMUSG00000013629	GSMG0029006	Cad	carbamoyl-phosphate synthetase 2, aspartate transcarbamylase, and dihydroorotase	1304.08	1128.3	-0.208445	0.523053
ENSMUSG00000013646	GSMG0005240	Sh3bp5l	SH3 binding domain protein 5 like	637.108	729.753	0.195798	0.425983
ENSMUSG00000013662	GSMG0020313	Atad1	ATPase family, AAA domain containing 1	1074.55	806.627	-0.412774	0.0233904
ENSMUSG00000013663	GSMG0019601	Pten	phosphatase and tensin homolog	1681.44	1924.87	0.19558	0.423667
ENSMUSG00000013698	GSMG0002468	Pea15a	phosphoprotein enriched in astrocytes 15A	19870.2	18050.8	-0.138476	0.513082
ENSMUSG00000013736	GSMG0032291	Trnt1	tRNA nucleotidyl transferase, CCA-adding, 1	415.583	348.098	-0.256682	0.419907
ENSMUSG00000013787	GSMG0016565	Ehmt2	euchromatic histone lysine N-methyltransferase 2	2020.61	1672.64	-0.272463	0.190185
ENSMUSG00000013822	GSMG0040468	Elof1	ELF1 homolog, elongation factor 1	1043.75	962.256	-0.116955	0.681007
ENSMUSG00000013833	GSMG0004322	Med16	mediator complex subunit 16	1856.86	1670.2	-0.152631	0.500252
ENSMUSG00000013846	GSMG0014071	St3gal1	ST3 beta-galactoside alpha-2,3-sialyltransferase 1	224.605	260.053	0.213444	0.479464
ENSMUSG00000013858	GSMG0004324	Tmem259	transmembrane protein 259	750.217	975.782	0.378229	0.0660159
ENSMUSG00000013878	GSMG0037133	Rnf170	ring finger protein 170	157.071	169.611	0.114001	0.7856
ENSMUSG00000013921	GSMG0034301	Clip3	CAP-GLY domain containing linker protein 3	340.813	301.197	-0.176557	0.586969
ENSMUSG00000013973	GSMG0001042	Dedd	death effector domain-containing	363.727	340.453	-0.0983189	0.773227
ENSMUSG00000013997	GSMG0002453	Nit1	nitrilase 1	351.549	366.742	0.0611317	0.864745
ENSMUSG00000014039	GSMG0016135	Prdm15	PR domain containing 15	419.9	429.614	0.0328017	0.938487
ENSMUSG00000014074	GSMG0014880	Rnf168	ring finger protein 168	991.967	886.163	-0.16418	0.57334
ENSMUSG00000014075	GSMG0014887	Tctex1d2	Tctex1 domain containing 2	220.671	192.073	-0.202843	0.581221
ENSMUSG00000014077	GSMG0021630	Chp1	calcineurin-like EF hand protein 1	1823.62	2064.36	0.179368	0.355917
ENSMUSG00000014158	GSMG0030956	Trpv4	transient receptor potential cation channel, subfamily V, member 4	81.2299	305.983	1.91203	4.42038e-11
ENSMUSG00000014177	GSMG0005332	Tvp23b	trans-golgi network vesicle protein 23B	431.317	589.523	0.451305	0.0358404
ENSMUSG00000014195	GSMG0007394	Dnajc7	DnaJ heat shock protein family (Hsp40) member C7	1739.68	1835.39	0.077797	0.760374
ENSMUSG00000014226	GSMG0002298	Cacybp	calcyclin binding protein	1913.52	1215.31	-0.655178	0.000721718
ENSMUSG00000014232	GSMG0014595	Cluap1	clusterin associated protein 1	288.218	235.947	-0.288624	0.297166
ENSMUSG00000014243	GSMG0006785	Zswim7	zinc finger SWIM-type containing 7	160.085	209.946	0.389772	0.151155
ENSMUSG00000014245	GSMG0043698	Pigl	phosphatidylinositol glycan anchor biosynthesis, class L	362.426	343.329	-0.0766841	0.812182
ENSMUSG00000014294	GSMG0018860	Ndufa2	NADH dehydrogenase (ubiquinone) 1 alpha subcomplex, 2	2483.37	2328.26	-0.0936393	0.7381
ENSMUSG00000014303	GSMG0014599	Glis2	GLIS family zinc finger 2	154.83	173.618	0.159127	0.751103
ENSMUSG00000014313	GSMG0013871	Cox6c	cytochrome c oxidase subunit VIc	4250.17	4132.64	-0.0408168	0.897112
ENSMUSG00000014329	GSMG0004231	Bicc1	BicC family RNA binding protein 1	439.606	608.925	0.470373	0.0216183
ENSMUSG00000014349	GSMG0007281	Ube2z	ubiquitin-conjugating enzyme E2Z	426.965	468.45	0.132565	0.728168
ENSMUSG00000014353	GSMG0021760	Tmem87b	transmembrane protein 87B	687.712	795.828	0.210661	0.323512
ENSMUSG00000014355	GSMG0023509	Anapc1	anaphase promoting complex subunit 1	502.793	390.629	-0.36243	0.116404
ENSMUSG00000014361	GSMG0021758	Mertk	c-mer proto-oncogene tyrosine kinase	129.199	423.646	1.71499	4.35518e-18
ENSMUSG00000014402	GSMG0035946	Tsg101	tumor susceptibility gene 101	1204.23	1059.72	-0.184086	0.413355
ENSMUSG00000014418	GSMG0035943	Hps5	Hermansky-Pudlak syndrome 5	1036.31	948.882	-0.126581	0.585051
ENSMUSG00000014426	GSMG0017115	Map3k4	mitogen-activated protein kinase kinase kinase 4	1184.91	955.764	-0.310411	0.129018
ENSMUSG00000014444	GSMG0039020	Piezo1	piezo-type mechanosensitive ion channel component 1	2222.07	2185.03	-0.0244772	0.956183
ENSMUSG00000014470	GSMG0039019	Rnf166	ring finger protein 166	643.199	854.179	0.407831	0.0352148
ENSMUSG00000014496	GSMG0012195	Ankrd28	ankyrin repeat domain 28	756.868	622.012	-0.281595	0.312367
ENSMUSG00000014498	GSMG0003693	Ankrd52	ankyrin repeat domain 52	240.052	195.427	-0.293203	0.379376
ENSMUSG00000014504	GSMG0018209	Srp19	signal recognition particle 19	1777.26	1486.66	-0.258042	0.25344
ENSMUSG00000014547	GSMG0011679	Wdfy2	WD repeat and FYVE domain containing 2	154.514	179.046	0.214148	0.587929
ENSMUSG00000014550	GSMG0033387	Rbsn	rabenosyn, RAB effector	627.063	614.003	-0.0320513	0.929105
ENSMUSG00000014551	GSMG0033386	Mrps25	mitochondrial ribosomal protein S25	1107.82	1045.56	-0.0830058	0.738724
ENSMUSG00000014554	GSMG0033251	Dguok	deoxyguanosine kinase	446.923	543.103	0.282193	0.198421
ENSMUSG00000014592	GSMG0051028	Camta1	calmodulin binding transcription activator 1	2005.8	1255.02	-0.677392	6.05543e-06
ENSMUSG00000014599	GSMG0025907	Csf1	colony stimulating factor 1 (macrophage)	1077.52	1059.26	-0.0253453	0.946594
ENSMUSG00000014601	GSMG0025902	Strip1	striatin interacting protein 1	5478.87	4508.51	-0.281019	0.0844078
ENSMUSG00000014602	GSMG0001912	Kif1a	kinesin family member 1A	7498.02	4670.43	-0.682807	0.00191305
ENSMUSG00000014606	GSMG0006911	Slc25a11	solute carrier family 25 (mitochondrial carrier oxoglutarate carrier), member 11	1018.33	1051.03	0.0456894	0.870332
ENSMUSG00000014633	GSMG0052421	Cmc2	COX assembly mitochondrial protein 2	471.455	447.572	-0.0766095	0.836741
ENSMUSG00000014668	GSMG0029584	Chfr	checkpoint with forkhead and ring finger domains	1734.21	1814.17	0.0655067	0.812553
ENSMUSG00000014748	GSMG0033258	Tex261	testis expressed gene 261	2254.74	1806.09	-0.32007	0.0673448
ENSMUSG00000014763	GSMG0016267	Fam120b	family with sequence similarity 120, member B	861.965	835.597	-0.0428691	0.90562
ENSMUSG00000014767	GSMG0016268	Tbp	TATA box binding protein	698.822	681.584	-0.0337506	0.920671
ENSMUSG00000014769	GSMG0017148	Psmb1	proteasome (prosome, macropain) subunit, beta type 1	4722.08	3839.57	-0.298482	0.0817834
ENSMUSG00000014771	GSMG0017149	Pdcd2	programmed cell death 2	316.02	233.805	-0.436104	0.0742854
ENSMUSG00000014776	GSMG0037714	Nol3	nucleolar protein 3 (apoptosis repressor with CARD domain)	334.215	150.083	-1.15198	4.52411e-07
ENSMUSG00000014786	GSMG0037719	Slc9a5	solute carrier family 9 (sodium/hydrogen exchanger), member 5	813.771	642.941	-0.339623	0.202491
ENSMUSG00000014813	GSMG0011748	Stc1	stanniocalcin 1	305.615	360.379	0.241476	0.493992
ENSMUSG00000014837	GSMG0038835	4931428F04Rik	RIKEN cDNA 4931428F04 gene	582.993	166.827	-1.80406	8.39921e-25
ENSMUSG00000014846	GSMG0038842	Tppp3	tubulin polymerization-promoting protein family member 3	775.981	508.071	-0.611601	0.00132099
ENSMUSG00000014850	GSMG0010943	Msh3	mutS homolog 3	211.052	183.104	-0.203269	0.574998
ENSMUSG00000014856	GSMG0037718	Tmem208	transmembrane protein 208	1800.08	1583.32	-0.184632	0.347864
ENSMUSG00000014859	GSMG0037716	E2f4	E2F transcription factor 4	1149.77	949.713	-0.27685	0.146785
ENSMUSG00000014867	GSMG0022574	Surf4	surfeit gene 4	10230.8	8618.29	-0.247341	0.142781
ENSMUSG00000014873	GSMG0020831	Surf2	surfeit gene 2	444.749	512.139	0.204213	0.401974
ENSMUSG00000014905	GSMG0008832	Dnajb9	DnaJ heat shock protein family (Hsp40) member B9	533.594	670.663	0.328201	0.278331
ENSMUSG00000014932	GSMG0029034	Yes1	YES proto-oncogene 1, Src family tyrosine kinase	1604.32	1487.2	-0.109103	0.674208
ENSMUSG00000014956	GSMG0029030	Ppp1cb	protein phosphatase 1, catalytic subunit, beta isoform	2077.31	2480.58	0.255197	0.218112
ENSMUSG00000014959	GSMG0021194	Gorasp2	golgi reassembly stacking protein 2	2215.69	1685.16	-0.394844	0.0141573
ENSMUSG00000014980	GSMG0002226	Tsen15	tRNA splicing endonuclease subunit 15	83.6555	105.058	0.327612	0.429198
ENSMUSG00000015002	GSMG0013244	Efr3a	EFR3 homolog A	1861.13	2153.49	0.210962	0.317646
ENSMUSG00000015013	GSMG0037941	Trappc2l	trafficking protein particle complex 2-like	797.112	832.609	0.0639524	0.833338
ENSMUSG00000015016	GSMG0037944	Acsf3	acyl-CoA synthetase family member 3	170.849	166.306	-0.0378552	0.943709
ENSMUSG00000015027	GSMG0039023	Galns	galactosamine (N-acetyl)-6-sulfate sulfatase	201.471	150.145	-0.42275	0.174181
ENSMUSG00000015053	GSMG0032190	Gata2	GATA binding protein 2	1220.15	2503.71	1.03636	8.88691e-12
ENSMUSG00000015085	GSMG0020796	Entpd2	ectonucleoside triphosphate diphosphohydrolase 2	240.632	288.495	0.264746	0.374239
ENSMUSG00000015087	GSMG0022539	Rabl6	RAB, member RAS oncogene family-like 6	1495.24	1454.38	-0.0399596	0.894448
ENSMUSG00000015090	GSMG0022531	Ptgds	prostaglandin D2 synthase (brain)	21274.5	39186.7	0.881268	0.000504132
ENSMUSG00000015092	GSMG0020802	Edf1	endothelial differentiation-related factor 1	2482.83	2512.11	0.0164509	0.959227
ENSMUSG00000015094	GSMG0020797	Npdc1	neural proliferation, differentiation and control 1	3572.81	2923.86	-0.288974	0.144989
ENSMUSG00000015095	GSMG0020801	Fbxw5	F-box and WD-40 domain protein 5	2527.15	2670.76	0.0798335	0.816762
ENSMUSG00000015126	GSMG0016370	Tsr3	TSR3 20S rRNA accumulation	592.116	596.824	0.0118945	0.970409
ENSMUSG00000015133	GSMG0036075	Lrrk1	leucine-rich repeat kinase 1	184.437	240	0.382902	0.241457
ENSMUSG00000015143	GSMG0009052	Actn1	actinin, alpha 1	654.847	756.773	0.207004	0.52138
ENSMUSG00000015149	GSMG0034257	Sirt2	sirtuin 2	896.082	1489.98	0.733901	2.53227e-05
ENSMUSG00000015165	GSMG0034259	Hnrnpl	heterogeneous nuclear ribonucleoprotein L	2986.89	2517.93	-0.246959	0.320553
ENSMUSG00000015176	GSMG0019757	Nolc1	nucleolar and coiled-body phosphoprotein 1	1881.21	1213.39	-0.632204	0.000630682
ENSMUSG00000015189	GSMG0031437	Casd1	CAS1 domain containing 1	535.691	423.489	-0.337997	0.12808
ENSMUSG00000015214	GSMG0041814	Mtmr1	myotubularin related protein 1	486.778	435.519	-0.159968	0.566922
ENSMUSG00000015222	GSMG0000378	Map2	microtubule-associated protein 2	869.201	452.29	-0.941227	8.78134e-08
ENSMUSG00000015224	GSMG0028090	Cyp2j9	cytochrome P450, family 2, subfamily j, polypeptide 9	97.7508	196.312	1.00533	0.000140108
ENSMUSG00000015243	GSMG0027811	Abca1	ATP-binding cassette, sub-family A (ABC1), member 1	9933.83	5789.72	-0.778764	0.00179484
ENSMUSG00000015247	GSMG0026563	Nipsnap3b	nipsnap homolog 3B (C. elegans)	535.947	438.72	-0.287946	0.267854
ENSMUSG00000015289	GSMG0042613	Lage3	L antigen family, member 3	857.575	822.444	-0.0617676	0.856989
ENSMUSG00000015290,ENSMUSG00000032806	GSMG0042614	Ubl4a // Gm44504 // Slc10a3	ubiquitin-like 4A // predicted readthrough transcript (NMD candidate), 44504 // solute carrier family 10 (sodium/bile acid cotransporter family), member 3	367.313	318.201	-0.207515	0.432379
ENSMUSG00000015291	GSMG0041857	Gdi1	guanosine diphosphate (GDP) dissociation inhibitor 1	6520.63	6685.69	0.0362178	0.901211
ENSMUSG00000015305	GSMG0003778	Sash1	SAM and SH3 domain containing 1	254.426	313.355	0.2992	0.243948
ENSMUSG00000015312	GSMG0003283	Gadd45b	growth arrest and DNA-damage-inducible 45 beta	184.353	378.203	1.03564	0.000159752
ENSMUSG00000015335	GSMG0022606	Zdhhc12	zinc finger, DHHC domain containing 12	189.116	213.049	0.173171	0.651161
ENSMUSG00000015337	GSMG0020886	Endog	endonuclease G	373.738	500.875	0.420095	0.0783486
ENSMUSG00000015341	GSMG0038195	Golga7	golgi autoantigen, golgin subfamily a, 7	2909.19	2781.04	-0.0652491	0.831159
ENSMUSG00000015357	GSMG0039679	Clpx	caseinolytic mitochondrial matrix peptidase chaperone subunit	1560.74	1342.35	-0.218109	0.312363
ENSMUSG00000015363	GSMG0013512	Trabd	TraB domain containing	972.365	886.127	-0.134031	0.59146
ENSMUSG00000015377	GSMG0014369	Dennd6b	DENN/MADD domain containing 6B	3198.55	3843.75	0.265454	0.218264
ENSMUSG00000015396	GSMG0009699	Cd83	CD83 antigen	1369.51	1254.73	-0.126383	0.623457
ENSMUSG00000015405	GSMG0042268	Ace2	angiotensin I converting enzyme (peptidyl-dipeptidase A) 2	927.853	2194.44	1.24261	1.48995e-12
ENSMUSG00000015452	GSMG0016553	Ager	advanced glycosylation end product-specific receptor	96.6334	56.8737	-0.764303	0.0549119
ENSMUSG00000015461	GSMG0016559	Atf6b	activating transcription factor 6 beta	3811.13	3041.95	-0.325586	0.0602166
ENSMUSG00000015467	GSMG0017430	Egfl8	EGF-like domain 8	1188.8	1743.57	0.552919	0.0380255
ENSMUSG00000015468	GSMG0016544	Notch4	notch 4	2301.77	2873.39	0.319694	0.269831
ENSMUSG00000015474	GSMG0017431	Ppt2	palmitoyl-protein thioesterase 2	917.788	945.154	0.0421538	0.903046
ENSMUSG00000015476	GSMG0016556	Prrt1	proline-rich transmembrane protein 1	97.9341	139.449	0.505332	0.153748
ENSMUSG00000015478	GSMG0017429	Rnf5	ring finger protein 5	1860.18	1282.87	-0.536015	0.000336186
ENSMUSG00000015488	GSMG0020834	Cacfd1	calcium channel flower domain containing 1	1689.01	1491.34	-0.17862	0.497097
ENSMUSG00000015501	GSMG0002728	Hivep2	human immunodeficiency virus type I enhancer binding protein 2	373.533	365.57	-0.0308642	0.93197
ENSMUSG00000015522,ENSMUSG00000097532	GSMG0060615	Gm4349 // Arnt	predicted gene 4349 // aryl hydrocarbon receptor nuclear translocator	1321.14	1367.5	0.0492163	0.853758
ENSMUSG00000015536	GSMG0010244	Mocs2	molybdenum cofactor synthesis 2	785.434	1122.58	0.514608	0.004889
ENSMUSG00000015542	GSMG0007617	Nat9	N-acetyltransferase 9 (GCN5-related, putative)	378.442	436.501	0.207256	0.418111
ENSMUSG00000015568	GSMG0037352	Lpl	lipoprotein lipase	1320.74	572.908	-1.2038	6.64709e-14
ENSMUSG00000015575	GSMG0016412	Atp6v0e	ATPase, H+ transporting, lysosomal V0 subunit E	2471.13	3360.1	0.443438	0.00481359
ENSMUSG00000015597	GSMG0016725	Zfp318	zinc finger protein 318	146.205	140.407	-0.0625396	0.893507
ENSMUSG00000015605	GSMG0017601	Srf	serum response factor	138.855	225.285	0.700184	0.0258828
ENSMUSG00000015647	GSMG0024007	Lama5	laminin, alpha 5	426.628	1062.24	1.3158	4.04315e-09
ENSMUSG00000015659	GSMG0017073	Serac1	serine active site containing 1	361.957	240.182	-0.58885	0.00867816
ENSMUSG00000015668	GSMG0042712	Pdzd11	PDZ domain containing 11	1033.95	1144.68	0.146956	0.508119
ENSMUSG00000015671	GSMG0009451	Psma2	proteasome (prosome, macropain) subunit, alpha type 2	2569	2205.52	-0.219831	0.300215
ENSMUSG00000015672	GSMG0010335	Mrpl32	mitochondrial ribosomal protein L32	598.116	553.243	-0.114159	0.778206
ENSMUSG00000015697	GSMG0025742	Setdb1	SET domain, bifurcated 1	324.448	272.856	-0.246725	0.386484
ENSMUSG00000015709	GSMG0036230	Arnt2	aryl hydrocarbon receptor nuclear translocator 2	305.361	405.331	0.409337	0.0838463
ENSMUSG00000015711	GSMG0025739	Prune	prune exopolyphosphatase	881.658	779.317	-0.179606	0.486131
ENSMUSG00000015714	GSMG0024652	Cers2	ceramide synthase 2	3537.61	3490.44	-0.018853	0.951532
ENSMUSG00000015733	GSMG0031525	Capza2	capping protein (actin filament) muscle Z-line, alpha 2	3041.59	2690.62	-0.177007	0.453523
ENSMUSG00000015745	GSMG0025754	Plekho1	pleckstrin homology domain containing, family O member 1	309.68	292.749	-0.0850474	0.814975
ENSMUSG00000015747	GSMG0025755	Vps45	vacuolar protein sorting 45	687.737	538.945	-0.350634	0.0759541
ENSMUSG00000015748	GSMG0025749	Prpf3	pre-mRNA processing factor 3	1194.49	1116.07	-0.0979064	0.687704
ENSMUSG00000015749	GSMG0024669	Anp32e	acidic (leucine-rich) nuclear phosphoprotein 32 family, member E	1328.67	767.071	-0.792454	3.07883e-05
ENSMUSG00000015755	GSMG0003767	Tab2	TGF-beta activated kinase 1/MAP3K7 binding protein 2	705.149	691.956	-0.0260159	0.936682
ENSMUSG00000015757	GSMG0002704	Ppil4	peptidylprolyl isomerase (cyclophilin)-like 4	405.724	417.25	0.0419619	0.901672
ENSMUSG00000015759	GSMG0012306	Cnih1	cornichon family AMPA receptor auxiliary protein 1	1967.71	1804.6	-0.124772	0.587393
ENSMUSG00000015766	GSMG0033831	Eps8	epidermal growth factor receptor pathway substrate 8	745.307	606.248	-0.300307	0.156838
ENSMUSG00000015776	GSMG0022572	Med22	mediator complex subunit 22	1953.94	2241.27	0.198145	0.447968
ENSMUSG00000015790	GSMG0022573	Surf1	surfeit gene 1	915.137	1048.67	0.196028	0.387015
ENSMUSG00000015804	GSMG0029137	Med28	mediator complex subunit 28	1615.62	1678.94	0.0548699	0.867703
ENSMUSG00000015806	GSMG0030454	Qdpr	quinoid dihydropteridine reductase	888.06	949.618	0.0971478	0.766079
ENSMUSG00000015829	GSMG0000941	Tnr	tenascin R	385.037	458.112	0.252909	0.399272
ENSMUSG00000015837	GSMG0006611	Sqstm1	sequestosome 1	3276.42	3775.41	0.204776	0.356198
ENSMUSG00000015839	GSMG0022999	Nfe2l2	nuclear factor, erythroid derived 2, like 2	2384.41	2838.04	0.251221	0.242103
ENSMUSG00000015843	GSMG0001021	Rxrg	retinoid X receptor gamma	96.0541	45.1821	-1.08157	0.00792884
ENSMUSG00000015846	GSMG0020842	Rxra	retinoid X receptor alpha	133.788	238.235	0.831688	0.32206
ENSMUSG00000015852	GSMG0025604	Fcrls	Fc receptor-like S, scavenger receptor	190.199	497.179	1.39031	1.28991e-08
ENSMUSG00000015869	GSMG0007665	Prpsap1	phosphoribosyl pyrophosphate synthetase-associated protein 1	3556.57	3316.69	-0.100385	0.661731
ENSMUSG00000015879	GSMG0030455	Fam184b	family with sequence similarity 184, member B	254.819	313.257	0.299162	0.277095
ENSMUSG00000015880	GSMG0029142	Ncapg	non-SMC condensin I complex, subunit G	202.013	105.16	-0.948214	0.00195459
ENSMUSG00000015882	GSMG0030457	Lcorl	ligand dependent nuclear receptor corepressor-like	372.486	323.105	-0.204193	0.447909
ENSMUSG00000015889	GSMG0003410	Lta4h	leukotriene A4 hydrolase	3842.26	3216.47	-0.256414	0.160827
ENSMUSG00000015932	GSMG0021885	Dstn	destrin	7068.92	7255.84	0.0376149	0.91279
ENSMUSG00000015937	GSMG0010714	H2afy	H2A histone family, member Y	4269.13	3190.74	-0.420069	0.0121295
ENSMUSG00000015942	GSMG0029887	Gtf2ird2	GTF2I repeat domain containing 2	156.244	139.281	-0.164475	0.701096
ENSMUSG00000015943	GSMG0025759	Bola1	bolA-like 1 (E. coli)	536.541	420.721	-0.352805	0.185754
ENSMUSG00000015944	GSMG0029884	Gatsl2	GATS protein-like 2	200.201	167.755	-0.256241	0.480765
ENSMUSG00000015961	GSMG0002532	Adss	adenylosuccinate synthetase, non muscle	891.707	663.163	-0.426337	0.0204426
ENSMUSG00000015968	GSMG0012167	Cacna1d	calcium channel, voltage-dependent, L type, alpha 1D subunit	437.22	435.59	-0.00512539	0.989811
ENSMUSG00000015971	GSMG0011369	Actr8	ARP8 actin-related protein 8	1416.4	1418.87	0.00312366	0.991421
ENSMUSG00000015994	GSMG0038223	Fnta	farnesyltransferase, CAAX box, alpha	1350.92	1567.52	0.215485	0.333844
ENSMUSG00000016018	GSMG0011136	Skiv2l2	superkiller viralicidic activity 2-like 2 (S. cerevisiae)	2451.5	2068.4	-0.245602	0.166499
ENSMUSG00000016024	GSMG0022080	Lbp	lipopolysaccharide binding protein	368.768	738.551	1.00492	0.000625037
ENSMUSG00000016087	GSMG0040536	Fli1	Friend leukemia integration 1	2266.82	1788.84	-0.34085	0.099379
ENSMUSG00000016128	GSMG0031419	Stard13	StAR-related lipid transfer (START) domain containing 13	1529.9	1482.02	-0.0454193	0.889455
ENSMUSG00000016150	GSMG0042447	Tenm1	teneurin transmembrane protein 1	1073.23	801.92	-0.419811	0.0442061
ENSMUSG00000016179	GSMG0002659	Camk1g	calcium/calmodulin-dependent protein kinase I gamma	668.669	643.503	-0.0529271	0.885924
ENSMUSG00000016181	GSMG0002652	Diexf	digestive organ expansion factor homolog (zebrafish)	177.86	143.954	-0.298098	0.389879
ENSMUSG00000016194	GSMG0002654	Hsd11b1	hydroxysteroid 11-beta dehydrogenase 1	80.5687	169.014	1.06971	4.63699e-05
ENSMUSG00000016206	GSMG0016640	H2-M3	histocompatibility 2, M region locus 3	179.619	181.283	0.0179989	0.969307
ENSMUSG00000016252	GSMG0023978	Atp5e	ATP synthase, H+ transporting, mitochondrial F1 complex, epsilon subunit	2217.33	1741.62	-0.349268	0.179925
ENSMUSG00000016253	GSMG0022262	Nelfcd	negative elongation factor complex member C/D, Th1l	2372.49	2002.92	-0.243957	0.181317
ENSMUSG00000016256	GSMG0023977	Ctsz	cathepsin Z	1498.86	1540.13	0.0401846	0.898237
ENSMUSG00000016257	GSMG0023979	Slmo2	slowmo homolog 2 (Drosophila)	1210.08	959.331	-0.334916	0.145755
ENSMUSG00000016262	GSMG0002649	Sertad4	SERTA domain containing 4	432.151	307.421	-0.492233	0.0274847
ENSMUSG00000016308	GSMG0041669	Ube2a	ubiquitin-conjugating enzyme E2A	1474.5	1298.95	-0.184148	0.449526
ENSMUSG00000016319	GSMG0041668	Slc25a5	solute carrier family 25 (mitochondrial carrier, adenine nucleotide translocator), member 5	5119.72	4143.44	-0.304971	0.0907492
ENSMUSG00000016344	GSMG0022315	Ppdpf	pancreatic progenitor cell differentiation and proliferation factor	1713.04	1415.36	-0.276365	0.211699
ENSMUSG00000016346	GSMG0024027	Kcnq2	potassium voltage-gated channel, subfamily Q, member 2	866.873	709.587	-0.289704	0.324775
ENSMUSG00000016349	GSMG0024030	Eef1a2	eukaryotic translation elongation factor 1 alpha 2	329.133	597.823	0.857946	0.00263403
ENSMUSG00000016382	GSMG0042627	Pls3	plastin 3 (T-isoform)	6839.88	8441.71	0.303578	0.128496
ENSMUSG00000016386	GSMG0021523	Mpped2	metallophosphoesterase domain containing 2	1015.46	749.471	-0.437961	0.0118545
ENSMUSG00000016409	GSMG0041672	Nkap	NFKB activating protein	328.475	258.926	-0.348173	0.260204
ENSMUSG00000016427	GSMG0042423	Ndufa1	NADH dehydrogenase (ubiquinone) 1 alpha subcomplex, 1	1722.67	1840.31	0.0950735	0.680857
ENSMUSG00000016477	GSMG0010494	E2f3	E2F transcription factor 3	119.794	90.0564	-0.416622	0.297378
ENSMUSG00000016481	GSMG0002669	Cr1l	complement component (3b/4b) receptor 1-like	1884.91	2132.95	0.179057	0.453716
ENSMUSG00000016487	GSMG0032660	Ppfibp1	PTPRF interacting protein, binding protein 1 (liprin beta 1)	3421.75	3506.35	0.0351305	0.894035
ENSMUSG00000016493	GSMG0002667	Cd46	CD46 antigen, complement regulatory protein	104.968	98.8288	-0.0844132	0.870136
ENSMUSG00000016494	GSMG0001261	Cd34	CD34 antigen	9715.48	9203.09	-0.0780698	0.758206
ENSMUSG00000016495	GSMG0020257	Plgrkt	plasminogen receptor, C-terminal lysine transmembrane protein	661.105	679.134	0.0389884	0.913408
ENSMUSG00000016503	GSMG0030058	Gtf3a	general transcription factor III A	243.742	202.054	-0.274015	0.412821
ENSMUSG00000016510	GSMG0031371	Mtif3	mitochondrial translational initiation factor 3	224.69	255.636	0.183986	0.557632
ENSMUSG00000016520	GSMG0031372	Lnx2	ligand of numb-protein X 2	1111.37	1459.56	0.392765	0.0156786
ENSMUSG00000016528	GSMG0002072	Mapkapk2	MAP kinase-activated protein kinase 2	1863.61	2264.78	0.280962	0.375694
ENSMUSG00000016534	GSMG0042436	Lamp2	lysosomal-associated membrane protein 2	2485.85	2420.17	-0.038273	0.9026
ENSMUSG00000016541	GSMG0013477	Atxn10	ataxin 10	3846.64	2584.06	-0.573562	0.000448306
ENSMUSG00000016552	GSMG0014207	Foxred2	FAD-dependent oxidoreductase domain containing 2	216.133	119.383	-0.858697	0.000918925
ENSMUSG00000016554	GSMG0014208	Eif3d	eukaryotic translation initiation factor 3, subunit D	1091.51	830.706	-0.393436	0.0334438
ENSMUSG00000016559	GSMG0007648	H3f3b	H3 histone, family 3B	23315	18080.8	-0.366839	0.103373
ENSMUSG00000016619	GSMG0013470	Nup50	nucleoporin 50	749.775	527.234	-0.509236	0.00534254
ENSMUSG00000016637	GSMG0014210	Ift27	intraflagellar transport 27	543.112	457.806	-0.245795	0.294684
ENSMUSG00000016664	GSMG0014321	Pacsin2	protein kinase C and casein kinase substrate in neurons 2	819.317	919.777	0.166322	0.519621
ENSMUSG00000016757	GSMG0014326	Ttll12	tubulin tyrosine ligase-like family, member 12	546.292	355.614	-0.61854	0.00171111
ENSMUSG00000016763	GSMG0014327	Scube1	signal peptide, CUB domain, EGF-like 1	528.852	601.855	0.188511	0.563642
ENSMUSG00000016831	GSMG0011544	Tox4	TOX high mobility group box family member 4	984.123	957.214	-0.0389648	0.898022
ENSMUSG00000016833	GSMG0029484	Mrps18c	mitochondrial ribosomal protein S18C	945.928	723.87	-0.387158	0.062021
ENSMUSG00000016921	GSMG0022109	Srsf6	serine/arginine-rich splicing factor 6	1480.33	1095.19	-0.433907	0.00902207
ENSMUSG00000016933	GSMG0022100	Plcg1	phospholipase C, gamma 1	1096.5	1089.48	-0.00893763	0.981499
ENSMUSG00000016940	GSMG0006102	Kctd2	potassium channel tetramerisation domain containing 2	1351.19	1494.57	0.145483	0.589399
ENSMUSG00000016946	GSMG0017212	Kctd5	potassium channel tetramerisation domain containing 5	1926.7	1530.79	-0.332	0.0513122
ENSMUSG00000016984	GSMG0006363	Etaa1	Ewing tumor-associated antigen 1	395.977	277.709	-0.508853	0.0271404
ENSMUSG00000016995	GSMG0023857	Matn4	matrilin 4	267.623	341.761	0.352748	0.354525
ENSMUSG00000017009	GSMG0023858	Sdc4	syndecan 4	268.558	530.941	0.984984	1.42456e-05
ENSMUSG00000017057	GSMG0041661	Il13ra1	interleukin 13 receptor, alpha 1	722.48	878.209	0.282284	0.151376
ENSMUSG00000017119	GSMG0005947	Nbr1	neighbor of Brca1 gene 1	3745	3842.56	0.0373328	0.886879
ENSMUSG00000017132	GSMG0007693	Cyth1	cytohesin 1	1280.1	1419.13	0.147937	0.540058
ENSMUSG00000017144	GSMG0022796	Rnd3	Rho family GTPase 3	1536.64	1329.53	-0.209038	0.316417
ENSMUSG00000017167	GSMG0005934	Cntnap1	contactin associated protein-like 1	90.9638	414.229	2.1851	3.39688e-15
ENSMUSG00000017176	GSMG0007390	Nt5c3b	5'-nucleotidase, cytosolic IIIB	999.358	776.575	-0.362711	0.0870681
ENSMUSG00000017188	GSMG0007417	Coa3	cytochrome C oxidase assembly factor 3	1912.47	1672.1	-0.194026	0.358019
ENSMUSG00000017210	GSMG0007333	Med24	mediator complex subunit 24	3603.83	3594.24	-0.00367987	0.990853
ENSMUSG00000017221	GSMG0005887	Psmd3	proteasome (prosome, macropain) 26S subunit, non-ATPase, 3	3949.49	3601.42	-0.132823	0.528272
ENSMUSG00000017264	GSMG0027384	Exosc10	exosome component 10	3833.95	3306.54	-0.213589	0.220284
ENSMUSG00000017286,ENSMUSG00000017288,ENSMUSG00000049396	GSMG0007000	Vps53 // Gemin4 // Glod4	VPS53 GARP complex subunit // gem (nuclear organelle) associated protein 4 // glyoxalase domain containing 4	4083.63	3858.52	-0.0816809	0.716722
ENSMUSG00000017291	GSMG0007026	Taok1	TAO kinase 1	706.931	701.903	-0.00971459	0.978985
ENSMUSG00000017299	GSMG0022153	Dnttip1	deoxynucleotidyltransferase, terminal, interacting protein 1	1477.87	1416.41	-0.0617815	0.818024
ENSMUSG00000017307	GSMG0023874	Acot8	acyl-CoA thioesterase 8	209.334	229.324	0.128333	0.719945
ENSMUSG00000017314	GSMG0007435	Mpp2	membrane protein, palmitoylated 2 (MAGUK p55 subfamily member 2)	305.51	496.333	0.70042	0.00237923
ENSMUSG00000017344	GSMG0005598	Vtn	vitronectin	17134.5	31497.3	0.878375	6.87599e-06
ENSMUSG00000017376	GSMG0007050	Nlk	nemo like kinase	300.603	344.894	0.19752	0.468125
ENSMUSG00000017386	GSMG0007036	Traf4	TNF receptor associated factor 4	561.921	279.328	-1.0096	1.89339e-07
ENSMUSG00000017390	GSMG0005592	Aldoc	aldolase C, fructose-bisphosphate	1961.45	3793.6	0.952165	2.09732e-06
ENSMUSG00000017400	GSMG0007320	Stac2	SH3 and cysteine rich domain 2	129.901	264.683	1.02898	1.25254e-05
ENSMUSG00000017405	GSMG0007037	Nek8	NIMA (never in mitosis gene a)-related expressed kinase 8	394.744	368.114	-0.0999699	0.757539
ENSMUSG00000017412	GSMG0022811	Cacnb4	calcium channel, voltage-dependent, beta 4 subunit	244.009	296.203	0.284452	0.379864
ENSMUSG00000017417	GSMG0007316	Plxdc1	plexin domain containing 1	883.529	1093.07	0.307546	0.110825
ENSMUSG00000017418	GSMG0020699	Arl5b	ADP-ribosylation factor-like 5B	378.727	423.013	0.162065	0.592242
ENSMUSG00000017421	GSMG0005627	Zfp207	zinc finger protein 207	3183.02	3803.9	0.257443	0.211223
ENSMUSG00000017428	GSMG0005629	Psmd11	proteasome (prosome, macropain) 26S subunit, non-ATPase, 11	1020.12	832.234	-0.292126	0.24426
ENSMUSG00000017446	GSMG0006174	C1qtnf1	C1q and tumor necrosis factor related protein 1	1452.85	1631.56	0.16746	0.469784
ENSMUSG00000017466	GSMG0007696	Timp2	tissue inhibitor of metalloproteinase 2	7182.89	5794.08	-0.309849	0.129441
ENSMUSG00000017478	GSMG0037930	Zc3h18	zinc finger CCCH-type containing 18	1234.5	1052.75	-0.231615	0.316624
ENSMUSG00000017485	GSMG0011250	Top2b	topoisomerase (DNA) II beta	1852.9	1499.62	-0.305654	0.108122
ENSMUSG00000017491	GSMG0012060	Rarb	retinoic acid receptor, beta	99.2288	98.4355	-0.009036	0.988912
ENSMUSG00000017493	GSMG0005899	Igfbp4	insulin-like growth factor binding protein 4	12014	6667.05	-0.8495	1.12488e-09
ENSMUSG00000017499	GSMG0005895	Cdc6	cell division cycle 6	303.855	98.862	-1.61476	2.58362e-10
ENSMUSG00000017548	GSMG0005616	Suz12	suppressor of zeste 12 homolog (Drosophila)	257.373	264.175	0.0324356	0.948476
ENSMUSG00000017550	GSMG0005617	Atad5	ATPase family, AAA domain containing 5	560.455	276.443	-1.0237	5.92306e-08
ENSMUSG00000017561	GSMG0007076	Crlf3	cytokine receptor-like factor 3	413.486	429.357	0.054972	0.877356
ENSMUSG00000017615	GSMG0007047	Tnfaip1	tumor necrosis factor, alpha-induced protein 1 (endothelial)	5009.93	4322.51	-0.212567	0.304459
ENSMUSG00000017631	GSMG0007008	Abr	active BCR-related gene	2182.44	2137.4	-0.0296737	0.932044
ENSMUSG00000017639	GSMG0005613	Rab11fip4	RAB11 family interacting protein 4 (class II)	319.641	248.477	-0.363703	0.20012
ENSMUSG00000017652	GSMG0022166	Cd40	CD40 antigen	1098.07	808.897	-0.43899	0.0346802
ENSMUSG00000017664	GSMG0023886	Slc35c2	solute carrier family 35, member C2	717.233	626.585	-0.194133	0.405359
ENSMUSG00000017667	GSMG0023889	Zfp334	zinc finger protein 334	827.455	545.068	-0.601444	0.000805746
ENSMUSG00000017670	GSMG0023887	Elmo2	engulfment and cell motility 2	1012.73	1227.73	0.277148	0.158598
ENSMUSG00000017677	GSMG0007064	Wsb1	WD repeat and SOCS box-containing 1	3863.69	3382.77	-0.191299	0.335231
ENSMUSG00000017679	GSMG0022119	Ttpal	tocopherol (alpha) transfer protein-like	287.091	297.285	0.0494368	0.894035
ENSMUSG00000017686	GSMG0005620	Rhot1	ras homolog family member T1	883.496	943.528	0.0956245	0.726424
ENSMUSG00000017692	GSMG0005624	Rhbdl3	rhomboid, veinlet-like 3 (Drosophila)	41.1622	138.572	1.74932	3.57765e-08
ENSMUSG00000017707	GSMG0023841	Serinc3	serine incorporator 3	15195.3	24597.8	0.694982	9.88675e-05
ENSMUSG00000017713	GSMG0007689	Tha1	threonine aldolase 1	80.4734	97.0802	0.264604	0.589323
ENSMUSG00000017715	GSMG0006168	Pgs1	phosphatidylglycerophosphate synthase 1	1478.12	1518.53	0.0390992	0.897509
ENSMUSG00000017716	GSMG0006164	Birc5	baculoviral IAP repeat-containing 5	1148.3	423.316	-1.43895	7.6691e-13
ENSMUSG00000017718,ENSMUSG00000048277	GSMG0006163	Syngr2 // Afmid	synaptogyrin 2 // arylformamidase	2040.15	2423.82	0.24893	0.19704
ENSMUSG00000017721	GSMG0022143	Pigt	phosphatidylinositol glycan anchor biosynthesis, class T	807.338	647.555	-0.31591	0.289087
ENSMUSG00000017724	GSMG0007427	Etv4	ets variant 4	294.543	190.034	-0.630368	0.0127906
ENSMUSG00000017734	GSMG0022141	Dbndd2	dysbindin (dystrobrevin binding protein 1) domain containing 2	1100.77	1877.61	0.770449	3.12612e-07
ENSMUSG00000017737	GSMG0022164	Mmp9	matrix metallopeptidase 9	1046.64	45.1442	-4.54405	1.25438e-88
ENSMUSG00000017740	GSMG0022165	Slc12a5	solute carrier family 12, member 5	808.057	899.332	0.154031	0.684164
ENSMUSG00000017747	GSMG0007403	Ghdc	GH3 domain containing	227.971	244.207	0.102825	0.791943
ENSMUSG00000017754	GSMG0023878	Pltp	phospholipid transfer protein	23803.6	44228.7	0.893825	5.2046e-11
ENSMUSG00000017756	GSMG0009936	Slc12a7	solute carrier family 12, member 7	795.576	724.733	-0.133841	0.653724
ENSMUSG00000017760	GSMG0022158	Ctsa	cathepsin A	5091.78	5451.51	0.0988036	0.685805
ENSMUSG00000017764	GSMG0022157	Zswim1	zinc finger SWIM-type containing 1	437.076	365.868	-0.255977	0.301631
ENSMUSG00000017765	GSMG0038860	Slc12a4	solute carrier family 12, member 4	1729.33	2457.33	0.506973	0.00909604
ENSMUSG00000017774	GSMG0005534	Myo1c	myosin IC	3982.66	4020.58	0.0135613	0.961813
ENSMUSG00000017776	GSMG0005535	Crk	v-crk avian sarcoma virus CT10 oncogene homolog	6774.03	6993.28	0.0460542	0.859454
ENSMUSG00000017781	GSMG0005531	Pitpna	phosphatidylinositol transfer protein, alpha	4493.51	4129.74	-0.121941	0.586836
ENSMUSG00000017801	GSMG0005931	Mlx	MAX-like protein X	343.427	407.083	0.247131	0.317306
ENSMUSG00000017802	GSMG0007411	Fam134c	family with sequence similarity 134, member C	482.232	467.769	-0.0457029	0.905107
ENSMUSG00000017831	GSMG0016795	Rab5a	RAB5A, member RAS oncogene family	1289.2	1238.15	-0.059333	0.852198
ENSMUSG00000017837	GSMG0005920	Nkiras2	NFKB inhibitor interacting Ras-like protein 2	211.16	189.858	-0.15448	0.661669
ENSMUSG00000017843	GSMG0008544	Ppp2r5c	protein phosphatase 2, regulatory subunit B', gamma	2183.33	1683.32	-0.376393	0.0683482
ENSMUSG00000017858	GSMG0022112	Ift52	intraflagellar transport 52	681.484	616.764	-0.144952	0.568498
ENSMUSG00000017861	GSMG0022113	Mybl2	myeloblastosis oncogene-like 2	388.094	126.177	-1.61305	1.18771e-14
ENSMUSG00000017897	GSMG0022170	Eya2	EYA transcriptional coactivator and phosphatase 2	139.625	117.066	-0.250559	0.583204
ENSMUSG00000017929	GSMG0023908	B4galt5	UDP-Gal:betaGlcNAc beta 1,4-galactosyltransferase, polypeptide 5	199.208	222.666	0.16163	0.670166
ENSMUSG00000017943	GSMG0022117	Gdap1l1	ganglioside-induced differentiation-associated protein 1-like 1	236.591	143.771	-0.714638	0.00598466
ENSMUSG00000017969	GSMG0023907	Ptgis	prostaglandin I2 (prostacyclin) synthase	1075.31	1193.57	0.152012	0.610905
ENSMUSG00000017978	GSMG0032770	Cadps2	Ca2+-dependent activator protein for secretion 2	208.663	370.961	0.831609	0.000488618
ENSMUSG00000017999	GSMG0022187	Ddx27	DEAD (Asp-Glu-Ala-Asp) box polypeptide 27	1655.42	1487	-0.154967	0.466891
ENSMUSG00000018001	GSMG0030023	Cyth3	cytohesin 3	1077.88	1371.44	0.347149	0.039586
ENSMUSG00000018008	GSMG0013354	Cyth4	cytohesin 4	369.324	519.204	0.49103	0.0237825
ENSMUSG00000018012	GSMG0006228	Rac3	RAS-related C3 botulinum substrate 3	2484.91	503.275	-2.30155	2.7947e-53
ENSMUSG00000018040	GSMG0014313	Rrp7a	ribosomal RNA processing 7 homolog A (S. cerevisiae)	571.587	456.635	-0.322113	0.143141
ENSMUSG00000018042	GSMG0014315	Cyb5r3	cytochrome b5 reductase 3	3250.27	4331.14	0.41448	0.0170276
ENSMUSG00000018068	GSMG0007155	Ints2	integrator complex subunit 2	1590.75	1079.3	-0.558296	0.000719807
ENSMUSG00000018076	GSMG0029715	Med13l	mediator complex subunit 13-like	182.21	180.43	-0.013542	0.981385
ENSMUSG00000018102	GSMG0009538	Hist1h2bc	histone cluster 1, H2bc	213.069	395.209	0.891156	0.000310674
ENSMUSG00000018143	GSMG0029975	Mafk	v-maf musculoaponeurotic fibrosarcoma oncogene family, protein K (avian)	758.45	1572.27	1.05217	6.5204e-12
ENSMUSG00000018160	GSMG0007323	Med1	mediator complex subunit 1	617.386	481.515	-0.358348	0.247422
ENSMUSG00000018167	GSMG0005878	Stard3	START domain containing 3	1310.06	1195.51	-0.131006	0.570637
ENSMUSG00000018169	GSMG0014224	Mfng	MFNG O-fucosylpeptide 3-beta-N-acetylglucosaminyltransferase	1482.71	1208.4	-0.295247	0.181667
ENSMUSG00000018171	GSMG0007166	Vmp1	vacuole membrane protein 1	1700.3	1515.03	-0.16584	0.454464
ENSMUSG00000018189	GSMG0000867	Uchl5	ubiquitin carboxyl-terminal esterase L5	744.967	543.885	-0.455828	0.0389983
ENSMUSG00000018196	GSMG0000866	Glrx2	glutaredoxin 2 (thioltransferase)	1231.03	1045.62	-0.237108	0.315726
ENSMUSG00000018199	GSMG0002189	Trove2	TROVE domain family, member 2	1174.33	979.944	-0.261509	0.247208
ENSMUSG00000018209	GSMG0022129	Stk4	serine/threonine kinase 4	440.793	421.719	-0.0619824	0.852731
ENSMUSG00000018217	GSMG0005335	Pmp22	peripheral myelin protein 22	2223.49	3775.56	0.764006	1.10424e-06
ENSMUSG00000018239	GSMG0005181	Zcchc10	zinc finger, CCHC domain containing 10	284.457	272.31	-0.0646231	0.87365
ENSMUSG00000018286	GSMG0005442	Psmb6	proteasome (prosome, macropain) subunit, beta type 6	3346.64	2580.18	-0.375087	0.0173744
ENSMUSG00000018287	GSMG0006913	Spag7	sperm associated antigen 7	1696.06	1523.54	-0.154783	0.453063
ENSMUSG00000018293	GSMG0006912	Pfn1	profilin 1	16127.7	10385.9	-0.63498	0.000481062
ENSMUSG00000018322	GSMG0023847	Tomm34	translocase of outer mitochondrial membrane 34	605.686	424.817	-0.507994	0.0310897
ENSMUSG00000018326	GSMG0022126	Ywhab	tyrosine 3-monooxygenase/tryptophan 5-monooxygenase activation protein, beta polypeptide	5523.29	4959.2	-0.155486	0.507816
ENSMUSG00000018339	GSMG0005209	Gpx3	glutathione peroxidase 3	312.854	288.509	-0.117833	0.727764
ENSMUSG00000018340	GSMG0006683	Anxa6	annexin A6	8339.64	4643.96	-0.844282	1.10951e-08
ENSMUSG00000018347	GSMG0005347	Zkscan6	zinc finger with KRAB and SCAN domains 6	666.973	590.562	-0.175356	0.442855
ENSMUSG00000018363	GSMG0007525	Smurf2	SMAD specific E3 ubiquitin protein ligase 2	161.964	219.732	0.437415	0.100284
ENSMUSG00000018372	GSMG0006039	Cep95	centrosomal protein 95	438.736	504.088	0.201358	0.463693
ENSMUSG00000018377	GSMG0005735	Vezf1	vascular endothelial zinc finger 1	540.541	569.489	0.0768844	0.817318
ENSMUSG00000018378	GSMG0005737	Cuedc1	CUE domain containing 1	798.34	681.694	-0.226959	0.281202
ENSMUSG00000018379	GSMG0005732	Srsf1	serine/arginine-rich splicing factor 1	6633.54	6113.64	-0.117933	0.628139
ENSMUSG00000018387	GSMG0005186	Shroom1	shroom family member 1	1944.44	2135.59	0.135057	0.571501
ENSMUSG00000018395	GSMG0005189	Kif3a	kinesin family member 3A	2091.68	1672.11	-0.32199	0.107792
ENSMUSG00000018398	GSMG0005188	Sept8	septin 8	1679.57	2163.24	0.365597	0.0320528
ENSMUSG00000018401	GSMG0005722	Mtmr4	myotubularin related protein 4	1484.83	1211.72	-0.293536	0.202869
ENSMUSG00000018405	GSMG0007135	Mrm1	mitochondrial rRNA methyltransferase 1	292.696	307.238	0.069739	0.853512
ENSMUSG00000018411	GSMG0005995	Mapt	microtubule-associated protein tau	4482.07	1071.88	-2.06532	8.30655e-45
ENSMUSG00000018412	GSMG0007491	Kansl1	KAT8 regulatory NSL complex subunit 1	1266.82	1220.35	-0.0545891	0.863667
ENSMUSG00000018415	GSMG0005288	Gid4	GID complex subunit 4, VID24 homolog	399.906	354.362	-0.175017	0.514452
ENSMUSG00000018417	GSMG0001558	Myo1b	myosin IB	13646.4	10530.8	-0.373905	0.0249885
ENSMUSG00000018425	GSMG0007172	Dhx40	DEAH (Asp-Glu-Ala-His) box polypeptide 40	968.754	1216.35	0.32852	0.0618509
ENSMUSG00000018427	GSMG0007175	Ypel2	yippee-like 2 (Drosophila)	307.3	696.932	1.17831	1.23565e-06
ENSMUSG00000018428	GSMG0007212	Akap1	A kinase (PRKA) anchor protein 1	432.774	372.061	-0.216721	0.391848
ENSMUSG00000018433	GSMG0007533	Nol11	nucleolar protein 11	636.168	537.482	-0.242874	0.337327
ENSMUSG00000018442	GSMG0006922	Derl2	Der1-like domain family, member 2	560.24	574.996	0.0364504	0.934367
ENSMUSG00000018446	GSMG0006920	C1qbp	complement component 1, q subcomponent binding protein	1778.92	1048.29	-0.764216	2.45685e-06
ENSMUSG00000018449	GSMG0005460	Rpain	RPA interacting protein	1039.41	1123.32	0.112271	0.621839
ENSMUSG00000018451	GSMG0006923	6330403K07Rik	RIKEN cDNA 6330403K07 gene	1900.27	1076.96	-0.820546	3.52272e-07
ENSMUSG00000018459	GSMG0023891	Slc13a3	solute carrier family 13 (sodium-dependent dicarboxylate transporter), member 3	597.918	444.559	-0.426506	0.0807032
ENSMUSG00000018470	GSMG0005402	Kcnab3	potassium voltage-gated channel, shaker-related subfamily, beta member 3	173.945	276.753	0.670868	0.0108906
ENSMUSG00000018474	GSMG0050875	Chd3	chromodomain helicase DNA binding protein 3	1380.18	1198.86	-0.203729	0.332087
ENSMUSG00000018476	GSMG0006864	Kdm6b	KDM1 lysine (K)-specific demethylase 6B	289.037	309.529	0.0999219	0.774499
ENSMUSG00000018481	GSMG0007142	Appbp2	amyloid beta precursor protein (cytoplasmic tail) binding protein 2	1257.69	1020.32	-0.300658	0.136522
ENSMUSG00000018500	GSMG0005316	Adora2b	adenosine A2b receptor	271.868	334.462	0.301781	0.302876
ENSMUSG00000018501	GSMG0006786	Ncor1	nuclear receptor co-repressor 1	3825.29	3517.68	-0.120834	0.631069
ENSMUSG00000018507	GSMG0005325	Trpv2	transient receptor potential cation channel, subfamily V, member 2	369.786	343.892	-0.100637	0.788426
ENSMUSG00000018509	GSMG0006790	Cenpv	centromere protein V	377.016	296.472	-0.351451	0.176365
ENSMUSG00000018537	GSMG0007310	Pcgf2	polycomb group ring finger 2	274.363	235.054	-0.220837	0.521099
ENSMUSG00000018541	GSMG0007312	Cwc25	CWC25 spliceosome-associated protein	371.571	362.938	-0.0359766	0.922437
ENSMUSG00000018548	GSMG0005716	Trim37	tripartite motif-containing 37	493.808	387.231	-0.35113	0.106724
ENSMUSG00000018559	GSMG0005427	Ctdnep1	CTD nuclear envelope phosphatase 1	327.742	418.111	0.349427	0.322207
ENSMUSG00000018565	GSMG0006895	Elp5	elongator acetyltransferase complex subunit 5	1690.4	1447.84	-0.222764	0.266994
ENSMUSG00000018566	GSMG0006894	Slc2a4	solute carrier family 2 (facilitated glucose transporter), member 4	84.0093	152.932	0.861477	0.00461882
ENSMUSG00000018567	GSMG0005428	Gabarap	gamma-aminobutyric acid receptor associated protein	3697.53	3553.87	-0.0572334	0.818651
ENSMUSG00000018570	GSMG0006892	2810408A11Rik	RIKEN cDNA 2810408A11 gene	109.206	58.1996	-0.894538	0.0151292
ENSMUSG00000018572	GSMG0005429	Phf23	PHD finger protein 23	767.775	708.333	-0.117638	0.65088
ENSMUSG00000018574	GSMG0006897	Acadvl	acyl-Coenzyme A dehydrogenase, very long chain	1802.98	1938.42	0.104968	0.678298
ENSMUSG00000018583	GSMG0005216	G3bp1	GTPase activating protein (SH3 domain) binding protein 1	3426.3	2688.84	-0.349491	0.0470013
ENSMUSG00000018585	GSMG0006690	Atox1	antioxidant 1 copper chaperone	4410.05	4701.37	0.0919786	0.796074
ENSMUSG00000018589	GSMG0043012	Glra2	glycine receptor, alpha 2 subunit	146.686	37.0262	-2.00438	1.65948e-10
ENSMUSG00000018593	GSMG0006689	Sparc	secreted acidic cysteine rich glycoprotein	88095.8	107258	0.283959	0.123674
ENSMUSG00000018599	GSMG0005294	Mief2	mitochondrial elongation factor 2	559.417	559.942	0.00122139	0.997414
ENSMUSG00000018604	GSMG0029724	Tbx3	T-box 3	1006.93	1325.33	0.394776	0.177744
ENSMUSG00000018634	GSMG0005993	Crhr1	corticotropin releasing hormone receptor 1	315.505	322.065	0.0278696	0.948185
ENSMUSG00000018648	GSMG0007126	Dusp14	dual specificity phosphatase 14	102.822	394.9	1.94022	6.54785e-15
ENSMUSG00000018651	GSMG0007127	Tada2a	transcriptional adaptor 2A	388.73	363.254	-0.0979598	0.75513
ENSMUSG00000018659	GSMG0007293	Pnpo	pyridoxine 5'-phosphate oxidase	439.681	607.595	0.466828	0.0467504
ENSMUSG00000018661	GSMG0006081	Cog1	component of oligomeric golgi complex 1	2144.61	2004.14	-0.0976112	0.70724
ENSMUSG00000018666	GSMG0005844	Cbx1	chromobox 1	1558.23	998.797	-0.642322	0.000395807
ENSMUSG00000018669	GSMG0007291	Cdk5rap3	CDK5 regulatory subunit associated protein 3	2016.53	1813.57	-0.153019	0.466202
ENSMUSG00000018672	GSMG0005848	Copz2	coatomer protein complex, subunit zeta 2	433.201	580.795	0.423226	0.0601165
ENSMUSG00000018677	GSMG0007447	Slc25a39	solute carrier family 25, member 39	3194.19	2903.36	-0.13766	0.503871
ENSMUSG00000018678	GSMG0007294	Sp2	Sp2 transcription factor	473.276	441.231	-0.103814	0.787461
ENSMUSG00000018697	GSMG0007130	Aatf	apoptosis antagonizing transcription factor	1006.4	783.516	-0.36033	0.043167
ENSMUSG00000018707	GSMG0008553	Dync1h1	dynein cytoplasmic 1 heavy chain 1	2914.57	2560.81	-0.186603	0.331655
ENSMUSG00000018733	GSMG0007115	Pex12	peroxisomal biogenesis factor 12	149.349	134.079	-0.152218	0.7442
ENSMUSG00000018736	GSMG0006846	Ndel1	nudE neurodevelopment protein 1 like 1	1529.16	1587.98	0.0552103	0.853488
ENSMUSG00000018740	GSMG0005386	Slc25a35	solute carrier family 25, member 35	90.0384	175.385	0.962105	0.00124777
ENSMUSG00000018752,ENSMUSG00000089669,ENSMUSG00000097328	GSMG0006878	Tnfsfm13 // Tnfsf13 // Tnfsf12	tumor necrosis factor (ligand) superfamily, membrane-bound member 13 // tumor necrosis factor (ligand) superfamily, member 13 // tumor necrosis factor (ligand) superfamily, member 12	144.826	236.246	0.705905	0.00544731
ENSMUSG00000018761	GSMG0006874	Mpdu1	mannose-P-dolichol utilization defect 1	684.971	506.996	-0.433767	0.0179671
ENSMUSG00000018765	GSMG0005411	Fxr2	fragile X mental retardation, autosomal homolog 2	1412.04	2027.59	0.521224	0.0744801
ENSMUSG00000018770	GSMG0022985	Atp5g3	ATP synthase, H+ transporting, mitochondrial F0 complex, subunit C3 (subunit 9)	3215.78	2778.05	-0.210734	0.316776
ENSMUSG00000018774	GSMG0006875	Cd68	CD68 antigen	156.087	270.54	0.797569	0.000854418
ENSMUSG00000018796	GSMG0037255	Acsl1	acyl-CoA synthetase long-chain family member 1	1783.62	1739.06	-0.0366159	0.89386
ENSMUSG00000018800	GSMG0007579	Abca5	ATP-binding cassette, sub-family A (ABC1), member 5	558.472	434.914	-0.361773	0.139976
ENSMUSG00000018809	GSMG0005523	Smyd4	SET and MYND domain containing 4	430.23	358.961	-0.259815	0.294999
ENSMUSG00000018819	GSMG0035374	Lsp1	lymphocyte specific 1	83.4834	88.247	0.0796459	0.887434
ENSMUSG00000018820	GSMG0019703	Zfyve27	zinc finger, FYVE domain containing 27	1121.64	1194.39	0.0909429	0.76858
ENSMUSG00000018821	GSMG0020398	Avpi1	arginine vasopressin-induced 1	281.016	489.009	0.800051	2.90536e-05
ENSMUSG00000018830	GSMG0015475	Myh11	myosin, heavy polypeptide 11, smooth muscle	46.8065	283.495	2.60009	0.00110456
ENSMUSG00000018841	GSMG0007101	Rad51d	RAD51 paralog D	147.48	117.964	-0.318499	0.368434
ENSMUSG00000018845	GSMG0005650	Unc45b	unc-45 myosin chaperone B	1125.71	977.201	-0.204329	0.405823
ENSMUSG00000018846	GSMG0005042	Pank3	pantothenate kinase 3	416.054	322.289	-0.370606	0.186724
ENSMUSG00000018848	GSMG0006515	Rars	arginyl-tRNA synthetase	1489.03	1091.88	-0.4463	0.0416059
ENSMUSG00000018849	GSMG0006516	Wwc1	WW, C2 and coiled-coil domain containing 1	1078.58	900.647	-0.260698	0.324775
ENSMUSG00000018858	GSMG0006101	Ict1	immature colon carcinoma transcript 1	882.66	669.241	-0.399788	0.0285144
ENSMUSG00000018861	GSMG0007619	Fdxr	ferredoxin reductase	311.242	308.365	-0.0131641	0.972161
ENSMUSG00000018865	GSMG0014329	Sult4a1	sulfotransferase family 4A, member 1	299.574	271.495	-0.143616	0.658436
ENSMUSG00000018882	GSMG0005857	Mrpl45	mitochondrial ribosomal protein L45	432.516	344.875	-0.324075	0.17571
ENSMUSG00000018899	GSMG0005191	Irf1	interferon regulatory factor 1	337.679	473.8	0.489818	0.0869095
ENSMUSG00000018900	GSMG0006668	Slc22a5	solute carrier family 22 (organic cation transporter), member 5	414.653	489.133	0.240364	0.398734
ENSMUSG00000018906	GSMG0005193	P4ha2	procollagen-proline, 2-oxoglutarate 4-dioxygenase (proline 4-hydroxylase), alpha II polypeptide	216.705	393.185	0.86331	9.55655e-05
ENSMUSG00000018909	GSMG0034869	Arrb1	arrestin, beta 1	260.036	221.344	-0.233766	0.55119
ENSMUSG00000018920	GSMG0006907	Cxcl16	chemokine (C-X-C motif) ligand 16	74.021	93.0478	0.335374	0.493759
ENSMUSG00000018921	GSMG0006905	Pelp1	proline, glutamic acid and leucine rich protein 1	442.582	352.772	-0.331554	0.329808
ENSMUSG00000018923	GSMG0005438	Med11	mediator complex subunit 11	186.116	157.516	-0.238375	0.492165
ENSMUSG00000018931	GSMG0006762	Natd1	N-acetyltransferase domain containing 1	978.902	984.591	0.0090393	0.979231
ENSMUSG00000018932	GSMG0005300	Map2k3	mitogen-activated protein kinase kinase 3	1140.35	1154.36	0.0181218	0.954848
ENSMUSG00000018974	GSMG0030940	Sart3	squamous cell carcinoma antigen recognized by T cells 3	1465.51	1191.68	-0.297996	0.174385
ENSMUSG00000018983	GSMG0027237	E2f2	E2F transcription factor 2	113.235	54.4208	-1.07526	0.00282514
ENSMUSG00000018995	GSMG0034830	Nars2	asparaginyl-tRNA synthetase 2 (mitochondrial)(putative)	483.397	472.941	-0.028878	0.934367
ENSMUSG00000018999	GSMG0032847	Slc35b4	solute carrier family 35, member B4	373.632	371.774	-0.00375829	0.992822
ENSMUSG00000019039	GSMG0040098	Dalrd3	DALR anticodon binding domain containing 3	2124.66	2335.93	0.137558	0.607263
ENSMUSG00000019054	GSMG0029925	Fis1	fission, mitochondrial 1	2885	2950.13	0.0323178	0.904494
ENSMUSG00000019055	GSMG0028647	Plod1	procollagen-lysine, 2-oxoglutarate 5-dioxygenase 1	7441.85	6855.75	-0.118238	0.584234
ENSMUSG00000019066	GSMG0040456	Rab3d	RAB3D, member RAS oncogene family	624.832	476.88	-0.391499	0.0871661
ENSMUSG00000019080	GSMG0013327	Mfsd3	major facilitator superfamily domain containing 3	396.29	387.789	-0.0290399	0.945648
ENSMUSG00000019082	GSMG0036867	Slc25a22	solute carrier family 25 (mitochondrial carrier, glutamate), member 22	857.057	808.48	-0.0840114	0.77871
ENSMUSG00000019087	GSMG0041856	Atp6ap1	ATPase, H+ transporting, lysosomal accessory protein 1	4076.2	4091.4	0.00579323	0.986119
ENSMUSG00000019088	GSMG0042611	Dnase1l1	deoxyribonuclease 1-like 1	276.321	387.92	0.492873	0.0320455
ENSMUSG00000019124	GSMG0033056	Scrn1	secernin 1	605.527	443.942	-0.449643	0.0625718
ENSMUSG00000019132	GSMG0009556	BC005537	cDNA sequence BC005537	1595.9	1699.25	0.0901192	0.796597
ENSMUSG00000019139	GSMG0037392	Isyna1	myo-inositol 1-phosphate synthase A1	4056.64	5520.69	0.444517	0.00968282
ENSMUSG00000019143	GSMG0018262	Hars2	histidyl-tRNA synthetase 2	951.504	810.598	-0.230408	0.292155
ENSMUSG00000019158	GSMG0034055	Tmem160	transmembrane protein 160	1145.13	1258.45	0.134566	0.654925
ENSMUSG00000019173	GSMG0007399	Rab5c	RAB5C, member RAS oncogene family	345.137	281.039	-0.294098	0.291515
ENSMUSG00000019179	GSMG0029908	Mdh2	malate dehydrogenase 2, NAD (mitochondrial)	6868.3	5656.46	-0.280022	0.119145
ENSMUSG00000019188	GSMG0021980	H13	histocompatibility 13	2794.59	2137.4	-0.386476	0.0137103
ENSMUSG00000019189	GSMG0005074	Rnf145	ring finger protein 145	850.17	817.238	-0.0554402	0.869087
ENSMUSG00000019194	GSMG0035773	Scn1b	sodium channel, voltage-gated, type I, beta	262.491	858.311	1.70815	2.30729e-14
ENSMUSG00000019210	GSMG0033628	Atp6v1e1	ATPase, H+ transporting, lysosomal V1 subunit E1	1900.17	1998.82	0.0730197	0.782722
ENSMUSG00000019214	GSMG0017253	Chtf18	CTF18, chromosome transmission fidelity factor 18	468.67	271.119	-0.790229	0.000129108
ENSMUSG00000019235	GSMG0009127	Rps6kl1	ribosomal protein S6 kinase-like 1	534.65	590.584	0.145525	0.621704
ENSMUSG00000019254	GSMG0035434	Ppp1r12c	protein phosphatase 1, regulatory (inhibitor) subunit 12C	1782.2	2723.87	0.611634	0.00657477
ENSMUSG00000019256	GSMG0008804	Ahr	aryl-hydrocarbon receptor	350.114	257.442	-0.447362	0.0653637
ENSMUSG00000019261	GSMG0037406	Map1s	microtubule-associated protein 1S	1790.84	1532.36	-0.225259	0.308539
ENSMUSG00000019295	GSMG0030360	Tmem129	transmembrane protein 129	306.073	386.509	0.338971	0.202772
ENSMUSG00000019297	GSMG0011610	Nop9	NOP9 nucleolar protein	1061.86	821.459	-0.370052	0.060109
ENSMUSG00000019302	GSMG0005925	Atp6v0a1	ATPase, H+ transporting, lysosomal V0 subunit A1	1403.85	1214.44	-0.209057	0.286069
ENSMUSG00000019303	GSMG0007410	Psmc3ip	proteasome (prosome, macropain) 26S subunit, ATPase 3, interacting protein	196.716	67.6677	-1.52493	1.28547e-07
ENSMUSG00000019312	GSMG0005882	Grb7	growth factor receptor bound protein 7	507.035	701.58	0.467799	0.0798781
ENSMUSG00000019320	GSMG0016349	Noxo1	NADPH oxidase organizer 1	218.293	162.789	-0.424421	0.109105
ENSMUSG00000019326	GSMG0005940	Aoc3	amine oxidase, copper containing 3	49.336	124.578	1.33797	0.000902062
ENSMUSG00000019338	GSMG0025727	Zfp687	zinc finger protein 687	219.642	190.087	-0.208436	0.567991
ENSMUSG00000019359	GSMG0041956	Gdpd2	glycerophosphodiester phosphodiesterase domain containing 2	367.257	347.308	-0.0762532	0.850585
ENSMUSG00000019362	GSMG0052416	D8Ertd738e	DNA segment, Chr 8, ERATO Doi 738, expressed	2085.18	2015.59	-0.0491271	0.860211
ENSMUSG00000019370	GSMG0035551	Calm3	calmodulin 3	5846.73	3852.36	-0.602015	0.00284689
ENSMUSG00000019373	GSMG0006743	Cops3	COP9 signalosome subunit 3	1825.27	1587.42	-0.200764	0.313367
ENSMUSG00000019428	GSMG0037389	Fkbp8	FK506 binding protein 8	4725.78	4747.54	0.00658454	0.981113
ENSMUSG00000019432	GSMG0065055	Ddx39b	DEAD (Asp-Glu-Ala-Asp) box polypeptide 39B	5089.47	4076.19	-0.320594	0.107659
ENSMUSG00000019433	GSMG0037522	Gipc1	GIPC PDZ domain containing family, member 1	3056.86	2576.21	-0.247143	0.148092
ENSMUSG00000019461	GSMG0005421	Plscr3	phospholipid scramblase 3	2379.5	1850.35	-0.363485	0.0481838
ENSMUSG00000019464	GSMG0037523	Ptger1	prostaglandin E receptor 1 (subtype EP1)	1674	1808.55	0.110946	0.725322
ENSMUSG00000019467	GSMG0004735	Arhgef25	Rho guanine nucleotide exchange factor (GEF) 25	1254.17	1950.33	0.637363	0.000589414
ENSMUSG00000019470	GSMG0038032	Xab2	XPA binding protein 2	2857.73	2936.98	0.0396009	0.89364
ENSMUSG00000019471	GSMG0040434	Cdc37	cell division cycle 37	3829.86	3293.02	-0.21771	0.290867
ENSMUSG00000019478	GSMG0037976	Rab4a	RAB4A, member RAS oncogene family	641.846	619.341	-0.0523012	0.864268
ENSMUSG00000019487	GSMG0016840	Trip10	thyroid hormone receptor interactor 10	994.846	1268.32	0.349628	0.0845934
ENSMUSG00000019494	GSMG0029949	Cops6	COP9 signalosome subunit 6	2604.01	2225.81	-0.226046	0.225552
ENSMUSG00000019518	GSMG0029950	Ap4m1	adaptor-related protein complex AP-4, mu 1	197.831	158.656	-0.314691	0.349818
ENSMUSG00000019528	GSMG0025202	Gyg	glycogenin	953.95	842.347	-0.178062	0.429658
ENSMUSG00000019539	GSMG0035890	Rcn3	reticulocalbin 3, EF-hand calcium binding domain	1393.3	1342.97	-0.052712	0.862648
ENSMUSG00000019558	GSMG0041842	Slc6a8	solute carrier family 6 (neurotransmitter transporter, creatine), member 8	399.127	642.313	0.686331	0.000320615
ENSMUSG00000019564	GSMG0003240	Arid3a	AT rich interactive domain 3A (BRIGHT-like)	249.85	208.161	-0.265622	0.411115
ENSMUSG00000019577	GSMG0032703	Pdk4	pyruvate dehydrogenase kinase, isoenzyme 4	450.878	362.008	-0.316614	0.219593
ENSMUSG00000019578	GSMG0017682	Ubxn6	UBX domain protein 6	842.977	894.279	0.0848408	0.74014
ENSMUSG00000019579	GSMG0017688	Mydgf	myeloid derived growth factor	2393.78	2069.13	-0.209652	0.310903
ENSMUSG00000019590	GSMG0007501	Cyb561	cytochrome b-561	258.866	386.387	0.577622	0.0134399
ENSMUSG00000019647	GSMG0018951	Sema6a	sema domain, transmembrane domain (TM), and cytoplasmic domain, (semaphorin) 6A	3711.42	2902.87	-0.354365	0.0256792
ENSMUSG00000019659	GSMG0040144	Ccdc12	coiled-coil domain containing 12	1435.14	1296.35	-0.14734	0.552852
ENSMUSG00000019689	GSMG0031712	1110001J03Rik	RIKEN cDNA 1110001J03 gene	527.451	413.563	-0.353475	0.229741
ENSMUSG00000019699	GSMG0002521	Akt3	thymoma viral proto-oncogene 3	1109.39	960.939	-0.207436	0.317843
ENSMUSG00000019710	GSMG0024502	Mrpl24	mitochondrial ribosomal protein L24	438.375	454.579	0.0535448	0.888342
ENSMUSG00000019715	GSMG0020866	Gle1	GLE1 RNA export mediator (yeast)	1842.69	1567.36	-0.233313	0.192375
ENSMUSG00000019718	GSMG0008977	L3hypdh	L-3-hydroxyproline dehydratase (trans-)	313.562	336.197	0.100098	0.777346
ENSMUSG00000019726	GSMG0009444	Lyst	lysosomal trafficking regulator	329.345	482.309	0.553143	0.00862976
ENSMUSG00000019731	GSMG0038602	Slc35e1	solute carrier family 35, member E1	301.241	299.752	-0.00758596	0.987201
ENSMUSG00000019732	GSMG0038600	Calr3	calreticulin 3	66.2292	79.0976	0.256342	0.63535
ENSMUSG00000019738	GSMG0034299	Polr2i	polymerase (RNA) II (DNA directed) polypeptide I	600.248	507.767	-0.243255	0.309528
ENSMUSG00000019761	GSMG0007350	Krt10	keratin 10	318.055	266.394	-0.260201	0.433677
ENSMUSG00000019772	GSMG0003738	Vip	vasoactive intestinal polypeptide	200.334	454.532	1.18234	2.2058e-09
ENSMUSG00000019773	GSMG0002681	Fbxo5	F-box protein 5	293.904	150.538	-0.96307	8.18618e-05
ENSMUSG00000019774	GSMG0002680	Mtrf1l	mitochondrial translational release factor 1-like	145.7	179.754	0.30556	0.348371
ENSMUSG00000019777	GSMG0002875	Hdac2	histone deacetylase 2	2934.5	2232.61	-0.393947	0.020286
ENSMUSG00000019779	GSMG0002867	Frk	fyn-related kinase	136.627	211.122	0.629168	0.0206615
ENSMUSG00000019782	GSMG0003978	Rwdd1	RWD domain containing 1	1057.37	755.9	-0.485115	0.041453
ENSMUSG00000019785	GSMG0003972	Clvs2	clavesin 2	98.5338	68.4782	-0.529667	0.17096
ENSMUSG00000019789	GSMG0003947	Hey2	hairy/enhancer-of-split related with YRPW motif 2	234.802	380.996	0.699452	0.00474469
ENSMUSG00000019790	GSMG0003796	Stxbp5	syntaxin binding protein 5 (tomosyn)	245.235	247.736	0.0154902	0.971015
ENSMUSG00000019791	GSMG0003943	Hint3	histidine triad nucleotide binding protein 3	371.369	334.408	-0.154324	0.663492
ENSMUSG00000019792	GSMG0003941	Trmt11	tRNA methyltransferase 11	362.504	311.858	-0.219471	0.426314
ENSMUSG00000019794	GSMG0002701	Katna1	katanin p60 (ATPase-containing) subunit A1	691.863	718.371	0.0552031	0.865297
ENSMUSG00000019795	GSMG0003760	Pcmt1	protein-L-isoaspartate (D-aspartate) O-methyltransferase 1	1035.67	1046.04	0.0152462	0.961935
ENSMUSG00000019796	GSMG0002696	Lrp11	low density lipoprotein receptor-related protein 11	1264.41	932.362	-0.439388	0.0359392
ENSMUSG00000019797	GSMG0004047	1700021F05Rik	RIKEN cDNA 1700021F05 gene	404.079	331.962	-0.286518	0.256331
ENSMUSG00000019802	GSMG0002930	Sec63	SEC63-like (S. cerevisiae)	2310.03	2012.36	-0.199171	0.335497
ENSMUSG00000019804	GSMG0002927	Snx3	sorting nexin 3	2176.63	1950.79	-0.158393	0.594549
ENSMUSG00000019806	GSMG0003823	Aig1	androgen-induced 1	508.983	473.804	-0.100824	0.754385
ENSMUSG00000019809	GSMG0003822	Pex3	peroxisomal biogenesis factor 3	515.322	539.684	0.0687174	0.831952
ENSMUSG00000019810	GSMG0002723	Fuca2	fucosidase, alpha-L- 2, plasma	774.366	958.978	0.309075	0.105272
ENSMUSG00000019813	GSMG0004024	Cep57l1	centrosomal protein 57-like 1	135.101	105.989	-0.352623	0.337584
ENSMUSG00000019814	GSMG0003816	Ltv1	LTV1 ribosome biogenesis factor	954.698	689.481	-0.467923	0.0124793
ENSMUSG00000019818	GSMG0002917	Cd164	CD164 antigen	3726.79	3453.82	-0.109857	0.679198
ENSMUSG00000019820	GSMG0003807	Utrn	utrophin	2092.6	3560.55	0.766804	5.00182e-06
ENSMUSG00000019822	GSMG0004022	Smpd2	sphingomyelin phosphodiesterase 2, neutral	1185.05	1410.9	0.252905	0.267632
ENSMUSG00000019823	GSMG0002915	Mical1	microtubule associated monooxygenase, calponin and LIM domain containing 1	1805.63	1368.86	-0.399486	0.0717398
ENSMUSG00000019826	GSMG0002914	Zbtb24	zinc finger and BTB domain containing 24	534.343	500.475	-0.0952424	0.732476
ENSMUSG00000019831	GSMG0002912	Wasf1	WAS protein family, member 1	951.115	628.603	-0.598322	0.00244917
ENSMUSG00000019832	GSMG0003800	Rab32	RAB32, member RAS oncogene family	185.916	168.828	-0.139359	0.726336
ENSMUSG00000019837	GSMG0004014	Gtf3c6	general transcription factor IIIC, polypeptide 6, alpha	1183.01	907.762	-0.381374	0.0314562
ENSMUSG00000019841	GSMG0002894	Rev3l	REV3 like, DNA directed polymerase zeta catalytic subunit	2045.62	1287.51	-0.666992	5.163e-05
ENSMUSG00000019843	GSMG0002889	Fyn	Fyn proto-oncogene	4018.45	2857.64	-0.491722	0.00250995
ENSMUSG00000019845	GSMG0002887	Tube1	epsilon-tubulin 1	117.355	71.9577	-0.707683	0.0399563
ENSMUSG00000019846	GSMG0002884	Lama4	laminin, alpha 4	5545.38	3400.6	-0.705019	4.76369e-05
ENSMUSG00000019849	GSMG0002955	Prep	prolyl endopeptidase	1697.05	1171.41	-0.534983	0.00381829
ENSMUSG00000019850	GSMG0003855	Tnfaip3	tumor necrosis factor, alpha-induced protein 3	288.348	313.257	0.121055	0.721735
ENSMUSG00000019851	GSMG0002749	Perp	PERP, TP53 apoptosis effector	376.876	1023.35	1.44116	1.31175e-16
ENSMUSG00000019852	GSMG0003851	Arfgef3	ARFGEF family member 3	399.792	310.116	-0.36312	0.241757
ENSMUSG00000019854	GSMG0002741	Reps1	RalBP1 associated Eps domain containing protein	729.201	637.392	-0.195102	0.536842
ENSMUSG00000019856	GSMG0050836	Fam184a	family with sequence similarity 184, member A	103.605	78.1869	-0.403214	0.304868
ENSMUSG00000019857	GSMG0002999	Asf1a	anti-silencing function 1A histone chaperone	853.622	637.36	-0.421642	0.0554967
ENSMUSG00000019861	GSMG0004083	Gopc	golgi associated PDZ and coiled-coil motif containing	444.383	430.053	-0.0462276	0.891413
ENSMUSG00000019863	GSMG0004048	Qrsl1	glutaminyl-tRNA synthase (glutamine-hydrolyzing)-like 1	353.824	294.625	-0.259952	0.352337
ENSMUSG00000019864	GSMG0002948	Rtn4ip1	reticulon 4 interacting protein 1	161.76	185.49	0.20169	0.566559
ENSMUSG00000019866	GSMG0050837	Aim1	absent in melanoma 1	61.3115	176.974	1.524	4.61947e-08
ENSMUSG00000019868	GSMG0003835	Vta1	vesicle (multivesicular body) trafficking 1	740.323	605.647	-0.289484	0.155155
ENSMUSG00000019872	GSMG0003015	Smpdl3a	sphingomyelin phosphodiesterase, acid-like 3A	1164.65	2369.79	1.02529	1.76697e-10
ENSMUSG00000019873	GSMG0004195	Reep3	receptor accessory protein 3	2096.82	2016.12	-0.0569415	0.837671
ENSMUSG00000019874	GSMG0003014	Fabp7	fatty acid binding protein 7, brain	8214.77	740.245	-3.47187	3.35512e-130
ENSMUSG00000019877	GSMG0004113	Serinc1	serine incorporator 1	5203.25	4781.98	-0.121383	0.649127
ENSMUSG00000019878	GSMG0003011	Hsf2	heat shock factor 2	277.079	268.381	-0.0432146	0.929105
ENSMUSG00000019883	GSMG0002847	Echdc1	enoyl Coenzyme A hydratase domain containing 1	990.628	984.3	-0.00860517	0.981215
ENSMUSG00000019889	GSMG0002823	Ptprk	protein tyrosine phosphatase, receptor type, K	9817.37	5003.33	-0.972284	2.34975e-11
ENSMUSG00000019890	GSMG0004523	Nts	neurotensin	389.285	113.258	-1.77961	1.68384e-13
ENSMUSG00000019891	GSMG0002982	Dcbld1	discoidin, CUB and LCCL domain containing 1	1228.88	492.591	-1.31924	4.29191e-20
ENSMUSG00000019894	GSMG0003493	Slc6a15	solute carrier family 6 (neurotransmitter transporter), member 15	613.958	161.998	-1.9198	2.04194e-17
ENSMUSG00000019897	GSMG0003496	Ccdc59	coiled-coil domain containing 59	1269.19	985.393	-0.366016	0.209685
ENSMUSG00000019899	GSMG0003923	Lama2	laminin, alpha 2	667.392	859.328	0.36589	0.0635685
ENSMUSG00000019906	GSMG0003498	Lin7a	lin-7 homolog A (C. elegans)	81.7116	130.824	0.67943	0.0683057
ENSMUSG00000019907	GSMG0003503	Ppp1r12a	protein phosphatase 1, regulatory (inhibitor) subunit 12A	1070.04	1076.72	0.00772384	0.981978
ENSMUSG00000019916	GSMG0003034	P4ha1	procollagen-proline, 2-oxoglutarate 4-dioxygenase (proline 4-hydroxylase), alpha 1 polypeptide	564.96	824.872	0.547315	0.00976132
ENSMUSG00000019917	GSMG0004120	Sept10	septin 10	1008.46	836.921	-0.268388	0.260148
ENSMUSG00000019920	GSMG0003019	Lims1	LIM and senescent cell antigen-like domains 1	3726.01	3020.41	-0.302466	0.132942
ENSMUSG00000019923	GSMG0003144	Zwint	ZW10 interactor	2323.15	1889.08	-0.298606	0.127859
ENSMUSG00000019927	GSMG0004236	Ube2d1	ubiquitin-conjugating enzyme E2D 1	1363.41	816.756	-0.74029	6.5496e-06
ENSMUSG00000019929	GSMG0003452	Dcn	decorin	1361.9	2055.65	0.595057	0.0053474
ENSMUSG00000019942	GSMG0004222	Cdk1	cyclin-dependent kinase 1	1805.21	768.498	-1.23112	5.32442e-12
ENSMUSG00000019943	GSMG0003459	Atp2b1	ATPase, Ca++ transporting, plasma membrane 1	10000.3	9150.06	-0.128133	0.519547
ENSMUSG00000019944	GSMG0003116	Rhobtb1	Rho-related BTB domain containing 1	1500.07	1417.99	-0.0818093	0.736948
ENSMUSG00000019947	GSMG0004206	Arid5b	AT rich interactive domain 5B (MRF1-like)	436.897	354.09	-0.300773	0.207253
ENSMUSG00000019948	GSMG0004449	Actr6	ARP6 actin-related protein 6	381.59	286.905	-0.41301	0.0982287
ENSMUSG00000019951	GSMG0003379	Uhrf1bp1l	UHRF1 (ICBP90) binding protein 1-like	1473.46	1468.33	-0.0049489	0.986119
ENSMUSG00000019952	GSMG0003465	Poc1b	POC1 centriolar protein B	349.616	265.59	-0.39569	0.0756868
ENSMUSG00000019960	GSMG0003469	Dusp6	dual specificity phosphatase 6	3261.91	3489.5	0.0975183	0.668747
ENSMUSG00000019961	GSMG0004458	Tmpo	thymopoietin	1230.96	846.135	-0.539805	0.00122491
ENSMUSG00000019966	GSMG0003474	Kitl	kit ligand	1018.11	2317.2	1.18621	2.73328e-14
ENSMUSG00000019969	GSMG0008301	Psen1	presenilin 1	1340.73	1241.93	-0.109341	0.707281
ENSMUSG00000019970	GSMG0002778	Sgk1	serum/glucocorticoid regulated kinase 1	1851.37	3110.61	0.749317	7.61905e-06
ENSMUSG00000019971	GSMG0003478	Cep290	centrosomal protein 290	757.663	987.85	0.382877	0.20266
ENSMUSG00000019975	GSMG0003399	Ikbip	IKBKB interacting protein	961.678	852.95	-0.173397	0.516377
ENSMUSG00000019977	GSMG0002772	Hbs1l	Hbs1-like (S. cerevisiae)	1978.07	1747.02	-0.178924	0.377757
ENSMUSG00000019978	GSMG0002811	Epb41l2	erythrocyte membrane protein band 4.1 like 2	1272.74	1262.91	-0.0100873	0.97634
ENSMUSG00000019979	GSMG0004452	Apaf1	apoptotic peptidase activating factor 1	583.921	442.643	-0.39928	0.0410077
ENSMUSG00000019984	GSMG0002809	Med23	mediator complex subunit 23	1367.2	1111.72	-0.298392	0.143482
ENSMUSG00000019986	GSMG0002769	Ahi1	Abelson helper integration site 1	608.523	570.011	-0.0948335	0.730845
ENSMUSG00000019988	GSMG0004466	Nedd1	neural precursor cell expressed, developmentally down-regulated gene 1	595.005	579.793	-0.0368544	0.920671
ENSMUSG00000019989	GSMG0003906	Enpp3	ectonucleotide pyrophosphatase/phosphodiesterase 3	241.562	100.875	-1.25585	2.16686e-05
ENSMUSG00000019990	GSMG0003870	Pde7b	phosphodiesterase 7B	116.959	141.075	0.278884	0.504069
ENSMUSG00000019992	GSMG0002767	Mtfr2	mitochondrial fission regulator 2	110.168	49.7658	-1.15893	0.00336267
ENSMUSG00000019996	GSMG0002761	Map7	microtubule-associated protein 7	833.53	1076.82	0.368033	0.0698224
ENSMUSG00000019997	GSMG0002808	Ctgf	connective tissue growth factor	478.247	1473.42	1.62431	8.11757e-11
ENSMUSG00000019998	GSMG0002803	Stx7	syntaxin 7	1190.48	993.758	-0.260338	0.260981
ENSMUSG00000020003	GSMG0003863	Pex7	peroxisomal biogenesis factor 7	278.777	315.771	0.182427	0.546864
ENSMUSG00000020009	GSMG0002755	Ifngr1	interferon gamma receptor 1	922.817	1282.69	0.475657	0.0080578
ENSMUSG00000020015	GSMG0003405	Cdk17	cyclin-dependent kinase 17	4219.7	4787.82	0.182224	0.368679
ENSMUSG00000020018	GSMG0004475	Snrpf	small nuclear ribonucleoprotein polypeptide F	212.096	160.927	-0.403282	0.243551
ENSMUSG00000020019	GSMG0003415	Ntn4	netrin 4	167.102	860.437	2.36606	6.97406e-34
ENSMUSG00000020021	GSMG0003422	Fgd6	FYVE, RhoGEF and PH domain containing 6	578.291	551.953	-0.0680022	0.826223
ENSMUSG00000020023	GSMG0065007	Tmcc3	transmembrane and coiled coil domains 3	265.838	537.204	1.01648	3.81941e-08
ENSMUSG00000020024	GSMG0003430	Cep83	centrosomal protein 83	525.748	498.21	-0.079645	0.843994
ENSMUSG00000020027	GSMG0043692	Socs2	suppressor of cytokine signaling 2	416.048	404.126	-0.0439235	0.904024
ENSMUSG00000020029	GSMG0004499	Nudt4	nudix (nucleoside diphosphate linked moiety X)-type motif 4	3361.69	3444.57	0.0348458	0.898022
ENSMUSG00000020034	GSMG0003340	Tcp11l2	t-complex 11 (mouse) like 2	1062.3	1545.08	0.541001	0.000511132
ENSMUSG00000020037	GSMG0003342	Rfx4	regulatory factor X, 4 (influences HLA class II expression)	115.929	152.403	0.39778	0.367248
ENSMUSG00000020038	GSMG0004408	Cry1	cryptochrome 1 (photolyase-like)	949.916	907.774	-0.0649761	0.817318
ENSMUSG00000020042	GSMG0003346	Btbd11	BTB (POZ) domain containing 11	139.215	104.347	-0.406936	0.329903
ENSMUSG00000020044	GSMG0003352	Timp3	tissue inhibitor of metalloproteinase 3	3714.47	10284.9	1.46937	1.21393e-28
ENSMUSG00000020048	GSMG0004421	Hsp90b1	heat shock protein 90, beta (Grp94), member 1	16869.2	14784.5	-0.19028	0.39413
ENSMUSG00000020056	GSMG0003370	Ccdc53	coiled-coil domain containing 53	819.676	757.305	-0.114298	0.666495
ENSMUSG00000020063	GSMG0004178	Sirt1	sirtuin 1	174.966	272.207	0.634045	0.0263601
ENSMUSG00000020064	GSMG0003080	Herc4	hect domain and RLD 4	469.473	488.665	0.0562718	0.879307
ENSMUSG00000020069	GSMG0004174	Hnrnph3	heterogeneous nuclear ribonucleoprotein H3	306.155	279.828	-0.129816	0.677121
ENSMUSG00000020070	GSMG0003076	Rufy2	RUN and FYVE domain-containing 2	1895.61	1814.48	-0.0620706	0.834526
ENSMUSG00000020074	GSMG0004168	Ccar1	cell division cycle and apoptosis regulator 1	3509.56	3037.28	-0.208058	0.311952
ENSMUSG00000020075	GSMG0004165	Ddx21	DEAD (Asp-Glu-Ala-Asp) box polypeptide 21	787.965	532.27	-0.563707	0.00262621
ENSMUSG00000020076	GSMG0004166	Ddx50	DEAD (Asp-Glu-Ala-Asp) box polypeptide 50	2470.54	2403.38	-0.0396553	0.892458
ENSMUSG00000020077	GSMG0004162	Srgn	serglycin	3047.81	3740.81	0.295521	0.197779
ENSMUSG00000020078	GSMG0004161	Vps26a	VPS26 retromer complex component A	645.548	687.387	0.0900199	0.791943
ENSMUSG00000020079	GSMG0004160	Supv3l1	suppressor of var1, 3-like 1 (S. cerevisiae)	537.717	450.121	-0.254756	0.317306
ENSMUSG00000020083	GSMG0004155	2010107G23Rik	RIKEN cDNA 2010107G23 gene	552.219	339.214	-0.706344	0.000268498
ENSMUSG00000020085	GSMG0003064	Aifm2	apoptosis-inducing factor, mitochondrion-associated 2	111.899	116.178	0.0514331	0.919939
ENSMUSG00000020086	GSMG0004151	H2afy2	H2A histone family, member Y2	740.861	314.928	-1.2351	2.3844e-13
ENSMUSG00000020087	GSMG0003063	Tysnd1	trypsin domain containing 1	898.121	714.847	-0.328437	0.0842584
ENSMUSG00000020088	GSMG0003062	Sar1a	secretion associated Ras related GTPase 1A	5925.34	5718.02	-0.0512554	0.854453
ENSMUSG00000020089	GSMG0003061	Ppa1	pyrophosphatase (inorganic) 1	827.513	553.191	-0.580689	0.00309758
ENSMUSG00000020091	GSMG0004145	Eif4ebp2	eukaryotic translation initiation factor 4E binding protein 2	719.459	829.545	0.204828	0.372456
ENSMUSG00000020092	GSMG0004143	Pald1	phosphatase domain containing, paladin 1	7043.82	5010.05	-0.491568	0.00213943
ENSMUSG00000020097	GSMG0004141	Sgpl1	sphingosine phosphate lyase 1	2625.96	2238.92	-0.229467	0.215697
ENSMUSG00000020099	GSMG0004138	Unc5b	unc-5 netrin receptor B	1746.59	1890.44	0.11386	0.611081
ENSMUSG00000020100	GSMG0004136	Slc29a3	solute carrier family 29 (nucleoside transporters), member 3	72.3	98.1836	0.443293	0.328821
ENSMUSG00000020101	GSMG0003045	Vsir	V-set immunoregulatory receptor	896.112	1217.68	0.443284	0.0287276
ENSMUSG00000020102	GSMG0004717	Slc16a7	solute carrier family 16 (monocarboxylic acid transporters), member 7	169.742	126.636	-0.419358	0.166878
ENSMUSG00000020107	GSMG0004131	Anapc16	anaphase promoting complex subunit 16	1609.83	1452.77	-0.148697	0.552862
ENSMUSG00000020108	GSMG0004130	Ddit4	DNA-damage-inducible transcript 4	220.936	785.05	1.82717	2.25891e-11
ENSMUSG00000020109	GSMG0003040	Dnajb12	DnaJ heat shock protein family (Hsp40) member B12	314.804	335.748	0.0904476	0.812089
ENSMUSG00000020111	GSMG0003038	Micu1	mitochondrial calcium uptake 1	1110.48	1054.88	-0.0739582	0.777898
ENSMUSG00000020114	GSMG0004659	Cand1	cullin associated and neddylation disassociated 1	518.995	442.213	-0.229677	0.319482
ENSMUSG00000020115	GSMG0004689	Tbk1	TANK-binding kinase 1	1432.71	1375.43	-0.0578681	0.833647
ENSMUSG00000020116	GSMG0006362	Pno1	partner of NOB1 homolog	340.982	218.238	-0.641115	0.00870985
ENSMUSG00000020121	GSMG0004696	Srgap1	SLIT-ROBO Rho GTPase activating protein 1	268.574	139.175	-0.943434	0.00237923
ENSMUSG00000020122	GSMG0004899	Egfr	epidermal growth factor receptor	189.961	146.418	-0.371645	0.232852
ENSMUSG00000020124	GSMG0004710	Usp15	ubiquitin specific peptidase 15	900.473	784.435	-0.19705	0.41891
ENSMUSG00000020128	GSMG0004930	Vps54	VPS54 GARP complex subunit	571.541	740.006	0.371268	0.143141
ENSMUSG00000020130	GSMG0004610	Tbc1d15	TBC1 domain family, member 15	795.927	756.21	-0.0729743	0.822073
ENSMUSG00000020132	GSMG0004612	Rab21	RAB21, member RAS oncogene family	201.369	324.17	0.682127	0.0363681
ENSMUSG00000020133	GSMG0004331	2310011J03Rik	RIKEN cDNA 2310011J03 gene	836.19	990.33	0.244345	0.220299
ENSMUSG00000020134	GSMG0004925	Peli1	pellino 1	1242.21	1196.31	-0.0531779	0.857115
ENSMUSG00000020135	GSMG0003259	Apc2	adenomatosis polyposis coli 2	4393.61	2024.43	-1.11787	5.40542e-07
ENSMUSG00000020142	GSMG0006386	Slc1a4	solute carrier family 1 (glutamate/neutral amino acid transporter), member 4	5498.99	1081.83	-2.34409	2.3039e-44
ENSMUSG00000020149	GSMG0004920	Rab1a	RAB1A, member RAS oncogene family	6573.42	5630.6	-0.223373	0.224285
ENSMUSG00000020150	GSMG0004330	Gamt	guanidinoacetate methyltransferase	334.981	475.206	0.502827	0.0139439
ENSMUSG00000020151	GSMG0003553	Ptprr	protein tyrosine phosphatase, receptor type, R	226.832	231.476	0.0346611	0.938487
ENSMUSG00000020152	GSMG0006379	Actr2	ARP2 actin-related protein 2	1061.41	966.8	-0.135689	0.705646
ENSMUSG00000020153	GSMG0003256	Ndufs7	NADH dehydrogenase (ubiquinone) Fe-S protein 7	2607.41	2578.82	-0.0160994	0.956427
ENSMUSG00000020154	GSMG0003557	Ptprb	protein tyrosine phosphatase, receptor type, B	3522.31	5839.4	0.729569	9.44959e-06
ENSMUSG00000020155	GSMG0005027	Kcnmb1	potassium large conductance calcium-activated channel, subfamily M, beta member 1	72.825	113.222	0.642037	0.0640574
ENSMUSG00000020156	GSMG0003255	Mum1	melanoma associated antigen (mutated) 1	1365.33	1192.77	-0.194389	0.356675
ENSMUSG00000020163	GSMG0004336	Uqcr11	ubiquinol-cytochrome c reductase, complex III subunit XI	2002.64	2445.84	0.288091	0.0908901
ENSMUSG00000020164	GSMG0003560	Kcnmb4os1	potassium large conductance calcium-activated channel, subfamily M, beta member 4, opposite strand 1	75.5708	84.3619	0.156228	0.770858
ENSMUSG00000020166	GSMG0004621	Cnot2	CCR4-NOT transcription complex, subunit 2	1557.48	1269.18	-0.294523	0.118128
ENSMUSG00000020167	GSMG0004337	Tcf3	transcription factor 3	3600.81	2867.17	-0.32889	0.0583946
ENSMUSG00000020170	GSMG0004630	Frs2	fibroblast growth factor receptor substrate 2	1101.81	1140.4	0.0483467	0.878841
ENSMUSG00000020171	GSMG0004634	Yeats4	YEATS domain containing 4	968.236	667.33	-0.538725	0.011948
ENSMUSG00000020175	GSMG0003155	Rab36	RAB36, member RAS oncogene family	301.638	371.478	0.302296	0.290758
ENSMUSG00000020176	GSMG0006347	Grb10	growth factor receptor bound protein 10	2630.77	1821.54	-0.531245	0.00313169
ENSMUSG00000020178	GSMG0003159	Adora2a	adenosine A2a receptor	2703.6	1540.9	-0.811623	3.39831e-08
ENSMUSG00000020180	GSMG0003163	Snrpd3	small nuclear ribonucleoprotein D3	2037.37	1291.84	-0.657314	0.000205724
ENSMUSG00000020181	GSMG0050844	Nav3	neuron navigator 3	2838.18	3389.78	0.256298	0.242822
ENSMUSG00000020182	GSMG0006346	Ddc	dopa decarboxylase	582.21	766.851	0.398324	0.0855788
ENSMUSG00000020183	GSMG0003577	Cpm	carboxypeptidase M	121.82	315.713	1.3748	6.41648e-11
ENSMUSG00000020184	GSMG0004642	Mdm2	transformed mouse 3T3 cell double minute 2	1450.72	1763.38	0.281222	0.114475
ENSMUSG00000020185	GSMG0003516	E2f7	E2F transcription factor 7	369.392	201.17	-0.873744	1.92473e-05
ENSMUSG00000020186	GSMG0003517	Csrp2	cysteine and glycine-rich protein 2	2543.94	2396.5	-0.0862407	0.74605
ENSMUSG00000020189	GSMG0003518	Osbpl8	oxysterol binding protein-like 8	653.629	651.745	-0.00525975	0.987741
ENSMUSG00000020190	GSMG0004343	Mknk2	MAP kinase-interacting serine/threonine kinase 2	2211.23	2019.68	-0.131276	0.75175
ENSMUSG00000020196	GSMG0004254	Cabin1	calcineurin binding protein 1	1489.22	1682.14	0.17541	0.47815
ENSMUSG00000020198	GSMG0004345	Ap3d1	adaptor-related protein complex 3, delta 1 subunit	5785.09	5352.68	-0.111935	0.664236
ENSMUSG00000020205	GSMG0003529	Phlda1	pleckstrin homology like domain, family A, member 1	894.996	1153.69	0.364421	0.139032
ENSMUSG00000020211	GSMG0003276	Sf3a2	splicing factor 3a, subunit 2	689.236	513.626	-0.427273	0.105748
ENSMUSG00000020212	GSMG0003581	Mdm1	transformed mouse 3T3 cell double minute 1	400.136	250.538	-0.675756	0.00238137
ENSMUSG00000020219	GSMG0004350	Timm13	translocase of inner mitochondrial membrane 13	2447.83	2066.54	-0.244888	0.259653
ENSMUSG00000020220	GSMG0051029	Vps13d	vacuolar protein sorting 13D	62.185	70.6445	0.182858	0.739231
ENSMUSG00000020225	GSMG0003600	Tmbim4	transmembrane BAX inhibitor motif containing 4	1639.27	1869.12	0.189695	0.327916
ENSMUSG00000020228	GSMG0004667	Helb	helicase (DNA) B	56.7785	51.9624	-0.112629	0.894035
ENSMUSG00000020230	GSMG0004266	Prmt2	protein arginine N-methyltransferase 2	2555.93	1442.31	-0.82532	6.04945e-09
ENSMUSG00000020231	GSMG0004267	Dip2a	disco interacting protein 2 homolog A	863.688	865.942	0.00326961	0.995081
ENSMUSG00000020232	GSMG0004366	Hmg20b	high mobility group 20B	928.663	855.955	-0.119744	0.718158
ENSMUSG00000020235	GSMG0004368	Fzr1	fizzy/cell division cycle 20 related 1 (Drosophila)	2190.23	1681.56	-0.380747	0.043338
ENSMUSG00000020238	GSMG0004371	Ncln	nicalin	2295.07	1909.52	-0.264919	0.203258
ENSMUSG00000020241	GSMG0004272	Col6a2	collagen, type VI, alpha 2	713.334	1091.1	0.61323	0.000147176
ENSMUSG00000020246	GSMG0003324	Hcfc2	host cell factor C2	523.246	513.167	-0.0274622	0.933449
ENSMUSG00000020248	GSMG0004389	Nfyb	nuclear transcription factor-Y beta	492.085	449.957	-0.128162	0.633868
ENSMUSG00000020250	GSMG0003326	Txnrd1	thioredoxin reductase 1	3099.79	2279.19	-0.443145	0.00610477
ENSMUSG00000020253	GSMG0041249	Ppm1m	protein phosphatase 1M	319.592	425.531	0.415161	0.062825
ENSMUSG00000020255	GSMG0003332	D10Wsu102e	DNA segment, Chr 10, Wayne State University 102, expressed	388.562	257.002	-0.592139	0.00707424
ENSMUSG00000020256	GSMG0004395	Aldh1l2	aldehyde dehydrogenase 1 family, member L2	564.822	114.676	-2.29733	9.18439e-23
ENSMUSG00000020257	GSMG0040034	Wdr82	WD repeat domain containing 82	1309.26	1335.95	0.0290935	0.920876
ENSMUSG00000020260	GSMG0003191	Pofut2	protein O-fucosyltransferase 2	1516.92	1373.75	-0.143064	0.492829
ENSMUSG00000020262	GSMG0004284	Adarb1	adenosine deaminase, RNA-specific, B1	292.682	237.591	-0.304503	0.311419
ENSMUSG00000020263	GSMG0004397	Appl2	adaptor protein, phosphotyrosine interaction, PH domain and leucine zipper containing 2	1252.85	1522.31	0.280621	0.213726
ENSMUSG00000020265	GSMG0003196	Sumo3	small ubiquitin-like modifier 3	4605.46	3697.72	-0.31646	0.0656964
ENSMUSG00000020267	GSMG0005208	Hint1	histidine triad nucleotide binding protein 1	3963.2	2604.14	-0.606474	0.00131449
ENSMUSG00000020271	GSMG0005019	Fbxw11	F-box and WD-40 domain protein 11	2494.43	2146.4	-0.216734	0.274165
ENSMUSG00000020272	GSMG0051219	Stk10	serine/threonine kinase 10	290.029	331.106	0.189547	0.52218
ENSMUSG00000020273	GSMG0006431	Papolg	poly(A) polymerase gamma	431.327	424.262	-0.0227913	0.9496
ENSMUSG00000020277	GSMG0004291	Pfkl	phosphofructokinase, liver, B-type	4404.91	4726.49	0.101992	0.662552
ENSMUSG00000020280	GSMG0004959	Pus10	pseudouridylate synthase 10	553.419	424.636	-0.384809	0.10307
ENSMUSG00000020282	GSMG0006482	Rhbdf1	rhomboid 5 homolog 1	3957	3630.15	-0.12421	0.564469
ENSMUSG00000020283	GSMG0006427	Pex13	peroxisomal biogenesis factor 13	402.205	388.875	-0.0471463	0.899337
ENSMUSG00000020284	GSMG0003202	1810043G02Rik	RIKEN cDNA 1810043G02 gene	347.58	428.331	0.3041	0.216254
ENSMUSG00000020287	GSMG0005006	Mpg	N-methylpurine-DNA glycosylase	1188.68	1073.57	-0.146978	0.505637
ENSMUSG00000020288	GSMG0006422	Ahsa2	AHA1, activator of heat shock protein ATPase 2	1043.16	858.462	-0.280923	0.149313
ENSMUSG00000020289	GSMG0006483	Nprl3	nitrogen permease regulator-like 3	1125.78	1089.31	-0.0475748	0.873669
ENSMUSG00000020290	GSMG0004950	Xpo1	exportin 1	2444.53	1577.44	-0.632616	3.04318e-05
ENSMUSG00000020297	GSMG0005004	Nsg2	neuron specific gene family member 2	5701.06	2411.92	-1.24171	5.40085e-16
ENSMUSG00000020300	GSMG0005001	Cpeb4	cytoplasmic polyadenylation element binding protein 4	164.515	143.265	-0.196985	0.587305
ENSMUSG00000020305	GSMG0004996	Asb3	ankyrin repeat and SOCS box-containing 3	384.273	372.333	-0.0439726	0.904542
ENSMUSG00000020307	GSMG0003226	Cdc34	cell division cycle 34	1002.89	832.877	-0.269423	0.191081
ENSMUSG00000020308	GSMG0003225	Tpgs1	tubulin polyglutamylase complex subunit 1	1459.34	1471.69	0.0113306	0.970265
ENSMUSG00000020309	GSMG0006473	Chac2	ChaC, cation transport regulator 2	248.576	217.428	-0.196271	0.620967
ENSMUSG00000020310	GSMG0003224	Madcam1	mucosal vascular addressin cell adhesion molecule 1	237.123	165.687	-0.518563	0.0454772
ENSMUSG00000020311	GSMG0006471	Erlec1	endoplasmic reticulum lectin 1	1212.68	1215.31	0.00348987	0.990853
ENSMUSG00000020312	GSMG0004313	Shc2	SHC (Src homology 2 domain containing) transforming protein 2	1143.86	1274.81	0.156366	0.588283
ENSMUSG00000020315	GSMG0006460	Sptbn1	spectrin beta, non-erythrocytic 1	6175.39	7429.1	0.266482	0.297734
ENSMUSG00000020319	GSMG0004934	Wdpcp	WD repeat containing planar cell polarity effector	114.614	116.643	0.0307643	0.954848
ENSMUSG00000020321	GSMG0006395	Mdh1	malate dehydrogenase 1, NAD (soluble)	4139.24	4864.8	0.233146	0.259285
ENSMUSG00000020326	GSMG0006548	Ccng1	cyclin G1	627.154	744.938	0.247532	0.346202
ENSMUSG00000020328	GSMG0005050	Nudcd2	NudC domain containing 2	822.935	602.913	-0.449461	0.0565785
ENSMUSG00000020329	GSMG0004316	Polrmt	polymerase (RNA) mitochondrial (DNA directed)	1000.92	962.244	-0.0560486	0.88189
ENSMUSG00000020330	GSMG0006547	Hmmr	hyaluronan mediated motility receptor (RHAMM)	159.478	68.2171	-1.23013	5.62474e-05
ENSMUSG00000020331	GSMG0003229	Hcn2	hyperpolarization-activated, cyclic nucleotide-gated K+ 2	395.233	848.45	1.10121	0.000173565
ENSMUSG00000020333	GSMG0005194	Acsl6	acyl-CoA synthetase long-chain family member 6	943.525	1545.75	0.712986	1.40827e-05
ENSMUSG00000020340	GSMG0006575	Cyfip2	cytoplasmic FMR1 interacting protein 2	454.968	478.194	0.0740243	0.844827
ENSMUSG00000020346	GSMG0005111	Mgat1	mannoside acetylglucosaminyltransferase 1	3248.49	2871.52	-0.178279	0.360023
ENSMUSG00000020349	GSMG0005171	Ppp2ca	protein phosphatase 2 (formerly 2A), catalytic subunit, alpha isoform	3591.94	3207.75	-0.162747	0.489354
ENSMUSG00000020357	GSMG0005124	Flt4	FMS-like tyrosine kinase 4	4238.26	3001.26	-0.498133	0.0258315
ENSMUSG00000020358	GSMG0006634	Hnrnpab	heterogeneous nuclear ribonucleoprotein A/B	3874.35	2581.98	-0.585547	0.00254199
ENSMUSG00000020359	GSMG0005161	Phykpl	5-phosphohydroxy-L-lysine phospholyase	208.247	262.796	0.340215	0.228836
ENSMUSG00000020361	GSMG0006653	Hspa4	heat shock protein 4	2814.16	2076.85	-0.438051	0.0100876
ENSMUSG00000020362	GSMG0006610	Cnot6	CCR4-NOT transcription complex, subunit 6	2305.84	2170.01	-0.0876589	0.746883
ENSMUSG00000020363	GSMG0005127	Gfpt2	glutamine fructose-6-phosphate transaminase 2	203.222	144.288	-0.495286	0.139552
ENSMUSG00000020364	GSMG0005153	Zfp354a	zinc finger protein 354A	591.414	583.01	-0.0187913	0.956612
ENSMUSG00000020366	GSMG0005128	Mapk9	mitogen-activated protein kinase 9	1027.16	929.922	-0.142141	0.547211
ENSMUSG00000020368	GSMG0006617	Canx	calnexin	12690.1	10561	-0.264923	0.134303
ENSMUSG00000020372	GSMG0005106	Rack1	receptor for activated C kinase 1	3716.95	2682.02	-0.470609	0.00106232
ENSMUSG00000020374	GSMG0005130	Rasgef1c	RasGEF domain family, member 1C	186.743	240.88	0.364201	0.214444
ENSMUSG00000020375	GSMG0006619	Rufy1	RUN and FYVE domain containing 1	850.678	927.839	0.125158	0.589275
ENSMUSG00000020376	GSMG0005131	Rnf130	ring finger protein 130	1745.53	2122.06	0.281916	0.117291
ENSMUSG00000020377	GSMG0006613	Ltc4s	leukotriene C4 synthase	98.8707	206.136	1.05382	0.00050855
ENSMUSG00000020380	GSMG0006664	Rad50	RAD50 double strand break repair protein	480.252	379.62	-0.339848	0.199565
ENSMUSG00000020381	GSMG0005135	3010026O09Rik	RIKEN cDNA 3010026O09 gene	808.862	873.497	0.11192	0.674712
ENSMUSG00000020385	GSMG0005155	Clk4	CDC like kinase 4	1448.69	1951.96	0.430476	0.0149206
ENSMUSG00000020386	GSMG0005166	Sar1b	secretion associated Ras related GTPase 1B	1787.28	1383.69	-0.369296	0.0556759
ENSMUSG00000020388	GSMG0006672	Pdlim4	PDZ and LIM domain 4	135.861	136.208	0.00797229	0.988926
ENSMUSG00000020389	GSMG0005170	Cdkl3	cyclin-dependent kinase-like 3	248.636	134.977	-0.882311	0.000268498
ENSMUSG00000020390	GSMG0006642	Ube2b	ubiquitin-conjugating enzyme E2B	2332.73	2741.73	0.232827	0.269622
ENSMUSG00000020392	GSMG0005168	Cdkn2aipnl	CDKN2A interacting protein N-terminal like	1650.54	1106.18	-0.577687	0.000257086
ENSMUSG00000020393	GSMG0006288	Kremen1	kringle containing transmembrane protein 1	341.002	326.991	-0.0609263	0.872301
ENSMUSG00000020396	GSMG0006282	Nefh	neurofilament, heavy polypeptide	137.252	281.336	1.03332	2.78613e-06
ENSMUSG00000020397	GSMG0005097	Med7	mediator complex subunit 7	613.831	623.773	0.0236351	0.949745
ENSMUSG00000020400	GSMG0006681	Tnip1	TNFAIP3 interacting protein 1	932.684	974.907	0.0625169	0.833936
ENSMUSG00000020402	GSMG0005176	Vdac1	voltage-dependent anion channel 1	2197.77	1658.43	-0.406109	0.0188058
ENSMUSG00000020409	GSMG0005064	Slu7	SLU7 splicing factor homolog (S. cerevisiae)	1544.96	1635.75	0.082174	0.76914
ENSMUSG00000020412	GSMG0004840	Ascc2	activating signal cointegrator 1 complex subunit 2	1603.59	1250.18	-0.359669	0.0493185
ENSMUSG00000020413	GSMG0006338	Hus1	HUS1 checkpoint clamp component	183.855	146.139	-0.329262	0.303519
ENSMUSG00000020415	GSMG0006559	Pttg1	pituitary tumor-transforming gene 1	742.079	286.124	-1.37299	1.29871e-13
ENSMUSG00000020422	GSMG0006335	Tns3	tensin 3	526.245	566.077	0.104254	0.831648
ENSMUSG00000020423	GSMG0002111	Btg2	B cell translocation gene 2, anti-proliferative	1131.95	3394.19	1.58454	6.81501e-19
ENSMUSG00000020424	GSMG0004835	Gatsl3	GATS protein-like 3	523.372	1199.21	1.19681	3.25072e-15
ENSMUSG00000020427	GSMG0006333	Igfbp3	insulin-like growth factor binding protein 3	1283.7	6384.63	2.31454	1.43019e-41
ENSMUSG00000020430	GSMG0004826	Pes1	pescadillo ribosomal biogenesis factor 1	475.949	361.49	-0.397359	0.0621797
ENSMUSG00000020431	GSMG0004874	Adcy1	adenylate cyclase 1	139.455	109.048	-0.352913	0.534535
ENSMUSG00000020432	GSMG0006265	Tcn2	transcobalamin 2	3341.02	4939.01	0.56424	0.000512555
ENSMUSG00000020435	GSMG0006261	Osbp2	oxysterol binding protein 2	412.841	559.573	0.439457	0.0588581
ENSMUSG00000020436	GSMG0006549	Gabrg2	gamma-aminobutyric acid (GABA) A receptor, subunit gamma 2	353.66	211.367	-0.740872	0.000594496
ENSMUSG00000020439	GSMG0006259	Smtn	smoothelin	7458.87	7273.42	-0.0365319	0.890469
ENSMUSG00000020440	GSMG0031579	Arf5	ADP-ribosylation factor 5	5026.1	4491.07	-0.162758	0.468305
ENSMUSG00000020441	GSMG0005261	2310033P09Rik	RIKEN cDNA 2310033P09 gene	816.228	858.155	0.0712168	0.820139
ENSMUSG00000020444	GSMG0006725	Guk1	guanylate kinase 1	1113.57	1126.36	0.0171317	0.9576
ENSMUSG00000020448	GSMG0006257	Rnf185	ring finger protein 185	591.819	496.092	-0.256751	0.294837
ENSMUSG00000020451	GSMG0006256	Limk2	LIM motif-containing protein kinase 2	2192.26	1920.47	-0.190603	0.33277
ENSMUSG00000020453	GSMG0004812	Patz1	POZ (BTB) and AT hook containing zinc finger 1	1220.84	1092.06	-0.162195	0.547622
ENSMUSG00000020454	GSMG0004809	Eif4enif1	eukaryotic translation initiation factor 4E nuclear import factor 1	1273.59	1124.81	-0.179391	0.426528
ENSMUSG00000020455	GSMG0005258	Trim11	tripartite motif-containing 11	896.81	1042.64	0.217321	0.339527
ENSMUSG00000020456	GSMG0004863	Ogdh	oxoglutarate (alpha-ketoglutarate) dehydrogenase (lipoamide)	1417.72	1526.17	0.106639	0.657826
ENSMUSG00000020457	GSMG0006251	Drg1	developmentally regulated GTP binding protein 1	1153.25	1058.32	-0.123355	0.636985
ENSMUSG00000020458	GSMG0004986	Rtn4	reticulon 4	682.745	661.161	-0.0487395	0.902166
ENSMUSG00000020459	GSMG0004983	Mtif2	mitochondrial translational initiation factor 2	599.206	567.869	-0.0765801	0.831947
ENSMUSG00000020462	GSMG0006451	Cfap36	cilia and flagella associated protein 36	931.758	827.665	-0.171293	0.523193
ENSMUSG00000020463	GSMG0004977	Smek2	SMEK homolog 2, suppressor of mek1 (Dictyostelium)	1771.25	1649.22	-0.103446	0.726395
ENSMUSG00000020464	GSMG0004976	Pnpt1	polyribonucleotide nucleotidyltransferase 1	1479.72	1051.18	-0.492318	0.00593774
ENSMUSG00000020467	GSMG0004975	Efemp1	epidermal growth factor-containing fibulin-like extracellular matrix protein 1	118.464	131.451	0.158988	0.755673
ENSMUSG00000020471	GSMG0006308	Pold2	polymerase (DNA directed), delta 2, regulatory subunit	586.733	386.362	-0.603027	0.00202112
ENSMUSG00000020472	GSMG0006734	Zkscan17	zinc finger with KRAB and SCAN domains 17	230.722	210.75	-0.129927	0.706841
ENSMUSG00000020473	GSMG0004858	Aebp1	AE binding protein 1	907.258	653.042	-0.473016	0.0964759
ENSMUSG00000020475	GSMG0006306	Pgam2	phosphoglycerate mutase 2	53.3267	83.0234	0.63519	0.212389
ENSMUSG00000020476	GSMG0004856	Dbnl	drebrin-like	2055.85	1910.63	-0.105541	0.636445
ENSMUSG00000020477	GSMG0006300	Mrps24	mitochondrial ribosomal protein S24	1375.97	1160.85	-0.246627	0.24426
ENSMUSG00000020482	GSMG0006298	Ccdc117	coiled-coil domain containing 117	1160.3	1308.96	0.17421	0.430432
ENSMUSG00000020483	GSMG0007200	Dynll2	dynein light chain LC8-type 2	740.658	698.368	-0.0866322	0.806117
ENSMUSG00000020484	GSMG0004852	Xbp1	X-box binding protein 1	6467.23	6257.71	-0.0473523	0.871978
ENSMUSG00000020486	GSMG0005721	Sept4	septin 4	8596.94	9479.19	0.14106	0.481158
ENSMUSG00000020492	GSMG0005714	Ska2	spindle and kinetochore associated complex subunit 2	205.049	155.474	-0.39898	0.177241
ENSMUSG00000020495	GSMG0007181	Smg8	smg-8 homolog, nonsense mediated mRNA decay factor (C. elegans)	222.259	203.973	-0.125811	0.727703
ENSMUSG00000020496	GSMG0006715	Rnf187	ring finger protein 187	1495.9	1295.86	-0.206764	0.336669
ENSMUSG00000020513	GSMG0005708	Tubd1	tubulin, delta 1	211.857	224.111	0.0851123	0.843493
ENSMUSG00000020514	GSMG0005232	Mrpl22	mitochondrial ribosomal protein L22	421.548	366.232	-0.203027	0.420578
ENSMUSG00000020515	GSMG0005231	Cnot8	CCR4-NOT transcription complex, subunit 8	1124.18	889.527	-0.33683	0.0770631
ENSMUSG00000020516	GSMG0007162	Rps6kb1	ribosomal protein S6 kinase, polypeptide 1	484.607	403.492	-0.26246	0.337888
ENSMUSG00000020519	GSMG0005227	Sap30l	SAP30-like	324.952	451.118	0.470671	0.127859
ENSMUSG00000020520	GSMG0005223	Galnt10	UDP-N-acetyl-alpha-D-galactosamine:polypeptide N-acetylgalactosaminyltransferase 10	522.897	426.084	-0.296219	0.193835
ENSMUSG00000020521	GSMG0005706	Rnft1	ring finger protein, transmembrane 1	676.372	868.341	0.360009	0.0986116
ENSMUSG00000020522	GSMG0005222	Mfap3	microfibrillar-associated protein 3	2997.25	2811.82	-0.091608	0.717762
ENSMUSG00000020523	GSMG0006694	Fam114a2	family with sequence similarity 114, member A2	1244.8	1342.08	0.108825	0.631548
ENSMUSG00000020524	GSMG0005219	Gria1	glutamate receptor, ionotropic, AMPA1 (alpha 1)	1975.66	1396.2	-0.500932	0.00879696
ENSMUSG00000020525	GSMG0005692	Ppm1d	protein phosphatase 1D magnesium-dependent, delta isoform	269.854	242.61	-0.147154	0.714842
ENSMUSG00000020526	GSMG0007140	Znhit3	zinc finger, HIT type 3	524.26	446.834	-0.23414	0.397793
ENSMUSG00000020527	GSMG0005687	Myo19	myosin XIX	266.554	246.509	-0.114528	0.767549
ENSMUSG00000020528	GSMG0006776	Prpsap2	phosphoribosyl pyrophosphate synthetase-associated protein 2	218.078	168.335	-0.372566	0.182013
ENSMUSG00000020530	GSMG0007137	Ggnbp2	gametogenetin binding protein 2	2634.53	2703.1	0.037062	0.897045
ENSMUSG00000020532	GSMG0005679	Acaca	acetyl-Coenzyme A carboxylase alpha	1636.55	924.171	-0.823922	1.3708e-06
ENSMUSG00000020534	GSMG0006759	Shmt1	serine hydroxymethyltransferase 1 (soluble)	170.936	83.6336	-1.02216	0.000404709
ENSMUSG00000020536	GSMG0005293	Llgl1	lethal giant larvae homolog 1 (Drosophila)	1799.05	2090.24	0.216508	0.348534
ENSMUSG00000020537	GSMG0005289	Drg2	developmentally regulated GTP binding protein 2	1091.05	1000.98	-0.123066	0.628265
ENSMUSG00000020538	GSMG0006748	Srebf1	sterol regulatory element binding transcription factor 1	1663.18	1671.27	0.00696542	0.98529
ENSMUSG00000020541	GSMG0007234	Tom1l1	target of myb1-like 1 (chicken)	170.027	178.416	0.0711597	0.872292
ENSMUSG00000020544	GSMG0005761	Cox11	cytochrome c oxidase assembly protein 11	451.398	409.038	-0.14449	0.623581
ENSMUSG00000020546	GSMG0007230	Stxbp4	syntaxin binding protein 4	314.889	315.087	0.00229915	0.996089
ENSMUSG00000020547	GSMG0008808	Bzw2	basic leucine zipper and W2 domains 2	2531.29	1043.35	-1.27806	4.72545e-18
ENSMUSG00000020549	GSMG0005345	Elac2	elaC ribonuclease Z 2	1255.69	1119.83	-0.163755	0.497507
ENSMUSG00000020561	GSMG0007958	Twistnb	twist basic helix-loop-helix transcription factor 1 neighbor	854.491	724.748	-0.237347	0.288996
ENSMUSG00000020564	GSMG0007950	Atxn7l1	ataxin 7-like 1	231.063	190.708	-0.276647	0.359492
ENSMUSG00000020570	GSMG0007949	Sypl	synaptophysin-like protein	1895.83	1975.42	0.0596381	0.831393
ENSMUSG00000020571	GSMG0007861	Pdia6	protein disulfide isomerase associated 6	8441.36	5276.91	-0.677595	2.4672e-05
ENSMUSG00000020572	GSMG0007946	Nampt	nicotinamide phosphoribosyltransferase	7078.55	5369.31	-0.398655	0.014988
ENSMUSG00000020573	GSMG0008789	Pik3cg	phosphoinositide-3-kinase, catalytic, gamma polypeptide	662.169	294.413	-1.16637	2.49326e-09
ENSMUSG00000020576	GSMG0050866	Nbas	neuroblastoma amplified sequence	276.868	243.788	-0.18512	0.586298
ENSMUSG00000020577	GSMG0008806	Tspan13	tetraspanin 13	13975.5	13845.7	-0.0134874	0.969902
ENSMUSG00000020580	GSMG0007858	Rock2	Rho-associated coiled-coil containing protein kinase 2	2586	3069.96	0.247163	0.320088
ENSMUSG00000020585	GSMG0007828	Laptm4a	lysosomal-associated protein transmembrane 4A	6543.3	7154.06	0.128681	0.589039
ENSMUSG00000020589	GSMG0007842	Fam49a	family with sequence similarity 49, member A	742.212	386.208	-0.94316	5.82599e-08
ENSMUSG00000020590	GSMG0007964	Snx13	sorting nexin 13	413.617	408.772	-0.0161988	0.964812
ENSMUSG00000020591	GSMG0007856	Ntsr2	neurotensin receptor 2	381.431	4070.85	3.41688	3.44732e-95
ENSMUSG00000020592	GSMG0007826	Sdc1	syndecan 1	211.836	219.542	0.0518319	0.916939
ENSMUSG00000020593	GSMG0008719	Lpin1	lipin 1	671.351	654.716	-0.0349946	0.915909
ENSMUSG00000020594	GSMG0007825	Pum2	pumilio RNA-binding family member 2	620.672	461.913	-0.426278	0.0464229
ENSMUSG00000020598	GSMG0008034	Nrcam	neuronal cell adhesion molecule	3930.24	3404.9	-0.206827	0.249063
ENSMUSG00000020599	GSMG0007566	Rgs9	regulator of G-protein signaling 9	157.313	169.584	0.101456	0.84289
ENSMUSG00000020601	GSMG0008715	Trib2	tribbles pseudokinase 2	6348.29	6611.69	0.0585712	0.831097
ENSMUSG00000020604	GSMG0006062	Arsg	arylsulfatase G	75.746	66.9264	-0.172049	0.826047
ENSMUSG00000020605	GSMG0007819	Hs1bp3	HCLS1 binding protein 3	83.4711	78.9527	-0.0846213	0.881777
ENSMUSG00000020607	GSMG0008712	Fam84a	family with sequence similarity 84, member A	544.563	348.593	-0.646458	0.0155157
ENSMUSG00000020608	GSMG0007839	Smc6	structural maintenance of chromosomes 6	688.628	545.461	-0.336537	0.177259
ENSMUSG00000020610	GSMG0006060	Amz2 // LOC100503496	archaelysin family metallopeptidase 2 // uncharacterized LOC100503496	628.083	518.311	-0.27421	0.294962
ENSMUSG00000020611	GSMG0006057	Gna13	guanine nucleotide binding protein, alpha 13	1088.34	1082.48	-0.00756196	0.979967
ENSMUSG00000020612	GSMG0006064	Prkar1a	protein kinase, cAMP dependent regulatory, type I, alpha	9823.6	9887.26	0.00941438	0.975685
ENSMUSG00000020614	GSMG0007570	Fam20a	family with sequence similarity 20, member A	352.615	477.06	0.436389	0.0286691
ENSMUSG00000020621	GSMG0007836	Rdh14	retinol dehydrogenase 14 (all-trans and 9-cis)	956.619	892.335	-0.100559	0.696228
ENSMUSG00000020623	GSMG0006069	Map2k6	mitogen-activated protein kinase kinase 6	146.416	138.461	-0.0745522	0.879253
ENSMUSG00000020627	GSMG0008672	Klhl29	kelch-like 29	263.939	245.382	-0.108253	0.841599
ENSMUSG00000020628	GSMG0008766	Trappc12	trafficking protein particle complex 12	798.792	764.724	-0.0616633	0.840822
ENSMUSG00000020629	GSMG0007914	Adi1	acireductone dioxygenase 1	771.352	915.579	0.246971	0.23149
ENSMUSG00000020630	GSMG0007913	Rnaseh1	ribonuclease H1	229.266	202.378	-0.180124	0.587617
ENSMUSG00000020634	GSMG0008669	Ubxn2a	UBX domain protein 2A	417.784	444.133	0.0859334	0.815043
ENSMUSG00000020635	GSMG0008667	Fkbp1b	FK506 binding protein 1b	510.581	199.361	-1.3534	1.25689e-12
ENSMUSG00000020638	GSMG0007909	Cmpk2	cytidine monophosphate (UMP-CMP) kinase 2, mitochondrial	265.931	363.603	0.453768	0.127893
ENSMUSG00000020640	GSMG0007793	Itsn2	intersectin 2	1238.66	1217.67	-0.025417	0.931175
ENSMUSG00000020641	GSMG0008754	Rsad2	radical S-adenosyl methionine domain containing 2	224.798	110.019	-1.03588	6.27458e-05
ENSMUSG00000020642	GSMG0008752	Rnf144a	ring finger protein 144A	341.637	196.384	-0.794287	0.000903052
ENSMUSG00000020644	GSMG0008749	Id2	inhibitor of DNA binding 2	1100.69	872.138	-0.337282	0.169289
ENSMUSG00000020646	GSMG0007896	Mboat2	membrane bound O-acyltransferase domain containing 2	548.741	385.942	-0.504175	0.0181728
ENSMUSG00000020647	GSMG0008659	Ncoa1	nuclear receptor coactivator 1	2053.98	2889.05	0.491918	0.0591235
ENSMUSG00000020649	GSMG0007894	Rrm2	ribonucleotide reductase M2	1392.01	565.302	-1.29902	1.87305e-10
ENSMUSG00000020650	GSMG0008781	Bcap29	B cell receptor associated protein 29	367.634	383.076	0.0571265	0.903086
ENSMUSG00000020652	GSMG0008657	Cenpo	centromere protein O	92.775	83.0651	-0.163311	0.737386
ENSMUSG00000020653	GSMG0007893	Klf11	Kruppel-like factor 11	792.506	797.76	0.00836833	0.979278
ENSMUSG00000020654	GSMG0007786	Adcy3	adenylate cyclase 3	1095.31	1046.95	-0.065025	0.853856
ENSMUSG00000020657	GSMG0007785	Dnajc27	DnaJ heat shock protein family (Hsp40) member C27	162.246	225.847	0.477297	0.0793675
ENSMUSG00000020658	GSMG0008654	Efr3b	EFR3 homolog B	2188.83	2687.99	0.296296	0.205498
ENSMUSG00000020659	GSMG0008778	Cbll1	Casitas B-lineage lymphoma-like 1	593.1	504.654	-0.233018	0.350214
ENSMUSG00000020660	GSMG0007784	Pomc	pro-opiomelanocortin-alpha	206.684	551.612	1.4163	2.79338e-11
ENSMUSG00000020661	GSMG0007782	Dnmt3a	DNA methyltransferase 3A	949.353	1084.39	0.191621	0.602558
ENSMUSG00000020664	GSMG0008777	Dld	dihydrolipoamide dehydrogenase	2335.97	1979.89	-0.238849	0.328821
ENSMUSG00000020668	GSMG0007773	Kif3c	kinesin family member 3C	356.499	256.615	-0.475596	0.0483639
ENSMUSG00000020669	GSMG0007932	Sh3yl1	Sh3 domain YSC-like 1	265.868	142.066	-0.909647	0.00125118
ENSMUSG00000020671	GSMG0008643	Rab10	RAB10, member RAS oncogene family	5975.02	4666.2	-0.356845	0.0523118
ENSMUSG00000020674	GSMG0007928	Pxdn	peroxidasin	4979.89	2503.02	-0.992579	1.73116e-09
ENSMUSG00000020677	GSMG0005674	Ddx52	DEAD (Asp-Glu-Ala-Asp) box polypeptide 52	909.987	757.507	-0.264455	0.235739
ENSMUSG00000020680	GSMG0005665	Taf15	TATA-box binding protein associated factor 15	83.7495	91.5899	0.135039	0.81337
ENSMUSG00000020681	GSMG0006023	Ace	angiotensin I converting enzyme (peptidyl-dipeptidase A) 1	240.656	625.527	1.37846	0.0239496
ENSMUSG00000020682	GSMG0007118	Mmp28	matrix metallopeptidase 28 (epilysin)	201.813	196.357	-0.0382325	0.943366
ENSMUSG00000020687	GSMG0007494	Cdc27	cell division cycle 27	1074.01	973.278	-0.140738	0.574416
ENSMUSG00000020691	GSMG0006003	Mettl2	methyltransferase like 2	380.969	290.731	-0.386574	0.143296
ENSMUSG00000020692	GSMG0007104	Nle1	notchless homolog 1 (Drosophila)	578.135	460.287	-0.329577	0.337467
ENSMUSG00000020694	GSMG0006005	Tlk2	tousled-like kinase 2 (Arabidopsis)	467.225	436.664	-0.0998005	0.767089
ENSMUSG00000020695	GSMG0006010	Mrc2	mannose receptor, C type 2	844.565	949.001	0.167409	0.633754
ENSMUSG00000020696	GSMG0007098	Rffl	ring finger and FYVE like domain containing protein	193.96	190.033	-0.0306054	0.944512
ENSMUSG00000020697	GSMG0005648	Lig3	ligase III, DNA, ATP-dependent	833.882	676.567	-0.298885	0.209927
ENSMUSG00000020700	GSMG0006030	Map3k3	mitogen-activated protein kinase kinase kinase 3	2058.26	2755.32	0.421024	0.112183
ENSMUSG00000020704	GSMG0007087	Asic2	acid-sensing (proton-gated) ion channel 2	222.182	227.067	0.0284891	0.951186
ENSMUSG00000020705	GSMG0006033	Ddx42	DEAD (Asp-Glu-Ala-Asp) box polypeptide 42	1894.51	1614.89	-0.230804	0.222697
ENSMUSG00000020706	GSMG0007508	Ftsj3	FtsJ RNA methyltransferase homolog 3 (E. coli)	1586.96	1261.98	-0.329587	0.0795928
ENSMUSG00000020707	GSMG0005619	Rnf135	ring finger protein 135	122.72	134.854	0.141921	0.765568
ENSMUSG00000020708	GSMG0006034	Psmc5	protease (prosome, macropain) 26S subunit, ATPase 5	3577.88	3272.06	-0.12851	0.578586
ENSMUSG00000020709	GSMG0005618	Adap2	ArfGAP with dual PH domains 2	348.511	523.303	0.589593	0.0133599
ENSMUSG00000020715	GSMG0007516	Ern1	endoplasmic reticulum (ER) to nucleus signalling 1	118.095	126.342	0.0940202	0.860503
ENSMUSG00000020717	GSMG0007522	Pecam1	platelet/endothelial cell adhesion molecule 1	9948.59	10823	0.121624	0.562203
ENSMUSG00000020718	GSMG0007523	Polg2	polymerase (DNA directed), gamma 2, accessory subunit	86.0964	66.1382	-0.384885	0.36416
ENSMUSG00000020719	GSMG0007524	Ddx5	DEAD (Asp-Glu-Ala-Asp) box polypeptide 5	6661.95	7170.05	0.106256	0.70837
ENSMUSG00000020720	GSMG0006043	Psmd12	proteasome (prosome, macropain) 26S subunit, non-ATPase, 12	2665.83	2184.26	-0.287548	0.174181
ENSMUSG00000020721	GSMG0006045	Helz	helicase with zinc finger domain	1070.26	1026.11	-0.0601944	0.850205
ENSMUSG00000020723	GSMG0007548	Cacng4	calcium channel, voltage-dependent, gamma subunit 4	492.283	191.453	-1.36358	0.0352671
ENSMUSG00000020728	GSMG0050883	Cep112	centrosomal protein 112	104.231	99.2137	-0.0731864	0.890309
ENSMUSG00000020733	GSMG0006095	Slc9a3r1	solute carrier family 9 (sodium/hydrogen exchanger), member 3 regulator 1	526.298	465.606	-0.175168	0.487601
ENSMUSG00000020734	GSMG0007618	Grin2c	glutamate receptor, ionotropic, NMDA2C (epsilon 3)	40.7793	327.422	3.00942	3.09814e-20
ENSMUSG00000020736	GSMG0007626	Nt5c	5',3'-nucleotidase, cytosolic	1465.95	1330.12	-0.140916	0.547364
ENSMUSG00000020737	GSMG0007627	Hn1	hematological and neurological expressed sequence 1	6773.31	2402.12	-1.49504	2.83396e-25
ENSMUSG00000020739	GSMG0006107	Nup85	nucleoporin 85	1850.38	1352.26	-0.451586	0.00553608
ENSMUSG00000020740	GSMG0007632	Gga3	golgi associated, gamma adaptin ear containing, ARF binding protein 3	785.789	756.104	-0.05675	0.859788
ENSMUSG00000020741	GSMG0005506	Cluh	clustered mitochondria (cluA/CLU1) homolog	1014.49	998.937	-0.0216741	0.961209
ENSMUSG00000020743	GSMG0043683	Mif4gd	MIF4G domain containing	1229.98	1544.44	0.328195	0.07197
ENSMUSG00000020744	GSMG0043684	Slc25a19	solute carrier family 25 (mitochondrial thiamine pyrophosphate carrier), member 19	272.457	242.186	-0.167349	0.621196
ENSMUSG00000020745	GSMG0006967	Pafah1b1	platelet-activating factor acetylhydrolase, isoform 1b, subunit 1	925.821	951.003	0.0372558	0.9026
ENSMUSG00000020747	GSMG0006111	Tmem94	transmembrane protein 94	508.084	466.798	-0.122373	0.719744
ENSMUSG00000020752	GSMG0007641	Recql5	RecQ protein-like 5	236.793	299.25	0.337026	0.279912
ENSMUSG00000020755	GSMG0006118	Sap30bp	SAP30 binding protein	533.409	456.843	-0.223893	0.40926
ENSMUSG00000020758	GSMG0006120	Itgb4	integrin beta 4	157.876	215.765	0.449232	0.209828
ENSMUSG00000020766	GSMG0007647	Galk1	galactokinase 1	965.001	794.952	-0.277757	0.301646
ENSMUSG00000020770	GSMG0006121	Unk	unkempt family zinc finger	1677.22	1571.64	-0.0935132	0.705884
ENSMUSG00000020773	GSMG0007651	Trim47	tripartite motif-containing 47	471.025	968.065	1.03941	2.15374e-11
ENSMUSG00000020775	GSMG0007653	Mrpl38	mitochondrial ribosomal protein L38	1016.3	1020.65	0.00480883	0.988069
ENSMUSG00000020776	GSMG0007654	Fbf1	Fas (TNFRSF6) binding factor 1	665.026	580.042	-0.198312	0.528272
ENSMUSG00000020777	GSMG0007655	Acox1	acyl-Coenzyme A oxidase 1, palmitoyl	3698.32	3262.33	-0.180676	0.368139
ENSMUSG00000020778	GSMG0006126	Ten1	TEN1 telomerase capping complex subunit	135.832	114.452	-0.241884	0.548587
ENSMUSG00000020780	GSMG0007658	Srp68	signal recognition particle 68	560.96	506.4	-0.146676	0.561169
ENSMUSG00000020781	GSMG0006112	Tsen54	tRNA splicing endonuclease subunit 54	726.354	672.024	-0.11257	0.652976
ENSMUSG00000020783	GSMG0005486	Ncbp3	nuclear cap binding subunit 3	757.619	646.694	-0.229197	0.316281
ENSMUSG00000020785	GSMG0005485	Camkk1	calcium/calmodulin-dependent protein kinase kinase 1, alpha	1289.24	1740.01	0.432628	0.0213116
ENSMUSG00000020787	GSMG0005484	P2rx1	purinergic receptor P2X, ligand-gated ion channel, 1	186.331	384.476	1.04358	2.56839e-07
ENSMUSG00000020788	GSMG0005483	Atp2a3	ATPase, Ca++ transporting, ubiquitous	2913.77	6123.12	1.07129	5.54065e-11
ENSMUSG00000020790	GSMG0005478	Ankfy1	ankyrin repeat and FYVE domain containing 1	398.318	296.575	-0.423443	0.0825411
ENSMUSG00000020792	GSMG0007660	Exoc7	exocyst complex component 7	2425.89	2129.52	-0.187541	0.325337
ENSMUSG00000020794	GSMG0005472	Ube2g1	ubiquitin-conjugating enzyme E2G 1	4341.68	3676.1	-0.240344	0.296409
ENSMUSG00000020801	GSMG0006933	Med31	mediator complex subunit 31	385.35	400.665	0.0556358	0.877685
ENSMUSG00000020802	GSMG0007668	Ube2o	ubiquitin-conjugating enzyme E2O	1014.47	1089.99	0.103694	0.781504
ENSMUSG00000020803	GSMG0005466	Txndc17	thioredoxin domain containing 17	1627.94	1583	-0.0406088	0.890924
ENSMUSG00000020806	GSMG0007670	Rhbdf2	rhomboid 5 homolog 2	1078	1561.1	0.533341	0.00989529
ENSMUSG00000020807	GSMG0006932	4933427D14Rik	RIKEN cDNA 4933427D14 gene	792.556	777.101	-0.0286777	0.931022
ENSMUSG00000020808	GSMG0005465	Fam64a	family with sequence similarity 64, member A	509.794	207.173	-1.29399	2.8118e-07
ENSMUSG00000020810	GSMG0007671	Cygb	cytoglobin	126.421	188.222	0.572114	0.0559182
ENSMUSG00000020811	GSMG0005464	Wscd1	WSC domain containing 1	1986.27	1458.08	-0.445761	0.0338734
ENSMUSG00000020812	GSMG0006138	1810032O08Rik	RIKEN cDNA 1810032O08 gene	136.09	88.5285	-0.620903	0.0458976
ENSMUSG00000020814	GSMG0007675	Mxra7	matrix-remodelling associated 7	803.823	1163.24	0.532332	0.00215695
ENSMUSG00000020817	GSMG0005456	Rabep1	rabaptin, RAB GTPase binding effector protein 1	1647.21	1533.15	-0.103864	0.66999
ENSMUSG00000020818	GSMG0006143	Mfsd11	major facilitator superfamily domain containing 11	756.308	698.007	-0.115298	0.63982
ENSMUSG00000020823	GSMG0006148	Sec14l1	SEC14-like lipid binding 1	1244.6	1284.64	0.0452155	0.872646
ENSMUSG00000020826	GSMG0005604	Nos2	nitric oxide synthase 2, inducible	1517.03	1421.73	-0.0947379	0.711779
ENSMUSG00000020827	GSMG0005444	Mink1	misshapen-like kinase 1 (zebrafish)	1424.77	1751.11	0.297149	0.37661
ENSMUSG00000020828	GSMG0005443	Pld2	phospholipase D2	1317.29	1167.73	-0.172434	0.480621
ENSMUSG00000020829	GSMG0005597	Slc46a1	solute carrier family 46, member 1	187.104	141.973	-0.394944	0.211799
ENSMUSG00000020831,ENSMUSG00000093989	GSMG0006900	0610010K14Rik // Rnasek	RIKEN cDNA 0610010K14 gene // ribonuclease, RNase K	3086.17	3272.14	0.0840759	0.73828
ENSMUSG00000020832	GSMG0007034	Eral1	Era (G-protein)-like 1 (E. coli)	512.565	455.043	-0.172079	0.487843
ENSMUSG00000020834	GSMG0005576	Dhrs13	dehydrogenase/reductase (SDR family) member 13	214.76	84.3039	-1.35161	2.55054e-07
ENSMUSG00000020836	GSMG0005563	Coro6	coronin 6	25.9966	349.52	3.7537	4.80941e-36
ENSMUSG00000020840	GSMG0005552	Blmh	bleomycin hydrolase	1608.93	1334.99	-0.268694	0.152272
ENSMUSG00000020841	GSMG0007014	Cpd	carboxypeptidase D	2084.92	2352.8	0.174401	0.520413
ENSMUSG00000020843	GSMG0005548	Timm22	translocase of inner mitochondrial membrane 22	1840.85	1692.7	-0.120814	0.600693
ENSMUSG00000020844	GSMG0007001	Nxn	nucleoredoxin	244.065	370.282	0.599143	0.00756301
ENSMUSG00000020846	GSMG0006996	Fam101b	family with sequence similarity 101, member B	14275.6	15334.1	0.103047	0.699618
ENSMUSG00000020847	GSMG0006994	Rph3al	rabphilin 3A-like (without C2 domains)	111.601	146.826	0.393952	0.239556
ENSMUSG00000020849	GSMG0005539	Ywhae	tyrosine 3-monooxygenase/tryptophan 5-monooxygenase activation protein, epsilon polypeptide	6019.79	3928.16	-0.616115	0.00620958
ENSMUSG00000020850	GSMG0005527	Prpf8	pre-mRNA processing factor 8	1626.57	1427.71	-0.187589	0.366834
ENSMUSG00000020857	GSMG0007239	Nme2	NME/NM23 nucleoside diphosphate kinase 2	3016.02	2096.09	-0.525269	0.00789036
ENSMUSG00000020859	GSMG0005778	Spag9	sperm associated antigen 9	3879.66	3657.16	-0.0851227	0.810053
ENSMUSG00000020863	GSMG0007244	Luc7l3	LUC7-like 3 (S. cerevisiae)	4796.26	4716.01	-0.0246458	0.946677
ENSMUSG00000020864	GSMG0005783	Ankrd40	ankyrin repeat domain 40	544.034	843.05	0.630214	0.00776051
ENSMUSG00000020866	GSMG0007246	Cacna1g	calcium channel, voltage-dependent, T type, alpha 1G subunit	866.696	648.412	-0.417637	0.0566276
ENSMUSG00000020868	GSMG0007254	Xylt2	xylosyltransferase II	1199.12	1532.39	0.353799	0.0917962
ENSMUSG00000020869	GSMG0005791	Lrrc59	leucine rich repeat containing 59	5305.36	3872.08	-0.45422	0.00338124
ENSMUSG00000020873	GSMG0005803	Slc35b1	solute carrier family 35, member B1	2659.46	2307.32	-0.20438	0.282196
ENSMUSG00000020876	GSMG0007289	Snx11	sorting nexin 11	330.851	372.664	0.171195	0.535266
ENSMUSG00000020877	GSMG0005853	Scrn2	secernin 2	189.086	159.524	-0.250847	0.463015
ENSMUSG00000020882	GSMG0007319	Cacnb1	calcium channel, voltage-dependent, beta 1 subunit	338.635	388.752	0.198531	0.525406
ENSMUSG00000020883	GSMG0007321	Fbxl20	F-box and leucine-rich repeat protein 20	560.334	608.273	0.118445	0.684864
ENSMUSG00000020886	GSMG0005431	Dlg4	discs, large homolog 4 (Drosophila)	601.415	758.148	0.334238	0.137476
ENSMUSG00000020888	GSMG0005430	Dvl2	dishevelled segment polarity protein 2	386.492	401.775	0.0538811	0.885924
ENSMUSG00000020889	GSMG0007334	Nr1d1	nuclear receptor subfamily 1, group D, member 1	581.789	975.645	0.746432	0.000292732
ENSMUSG00000020893	GSMG0005395	Per1	period circadian clock 1	175.654	447.069	1.35073	9.10088e-07
ENSMUSG00000020894	GSMG0005394	Vamp2	vesicle-associated membrane protein 2	4734.14	6175.24	0.383218	0.0186004
ENSMUSG00000020895	GSMG0005392	Tmem107	transmembrane protein 107	260.719	251.742	-0.0513962	0.909928
ENSMUSG00000020897	GSMG0005390	Aurkb	aurora kinase B	723.351	271.422	-1.41145	1.63504e-13
ENSMUSG00000020898	GSMG0005389	Ctc1	CTS telomere maintenance complex component 1	1731.46	1200.58	-0.526951	0.0108117
ENSMUSG00000020899	GSMG0050876	Pfas	phosphoribosylformylglycinamidine synthase (FGAR amidotransferase)	988.431	735.858	-0.426841	0.0177786
[truncated: 9,287 more rows]

## Sheet: Increased
Ensembl reference name	id	Gene symbol	Description	baseMean P5	baseMean P15	log2FoldChange (P15 v. P5)	padj
ENSMUSG00000000320	GSMG0006901	Alox12	arachidonate 12-lipoxygenase	49.8385	162.508	1.7097	1.16557e-06
ENSMUSG00000000440	GSMG0032353	Pparg	peroxisome proliferator activated receptor gamma	23.6595	118.729	2.32628	4.20331e-12
ENSMUSG00000001119	GSMG0004273	Col6a1	collagen, type VI, alpha 1	1353.1	5794.4	2.09846	2.87878e-30
ENSMUSG00000001128	GSMG0042394	Cfp	complement factor properdin	137.09	280.163	1.03671	3.5446e-05
ENSMUSG00000001520	GSMG0032514	Nrip2	nuclear receptor interacting protein 2	87.8118	335.441	1.93786	3.78965e-17
ENSMUSG00000001870	GSMG0016928	Ltbp1	latent transforming growth factor beta binding protein 1	34.0321	122.479	1.85597	1.12315e-07
ENSMUSG00000002007	GSMG0041846	Srpk3	serine/arginine-rich protein specific kinase 3	49.0913	204.68	2.06656	5.18666e-12
ENSMUSG00000002032	GSMG0040670	Tmem25	transmembrane protein 25	610.638	1310.95	1.10318	6.19417e-11
ENSMUSG00000002475	GSMG0018710	Abhd3	abhydrolase domain containing 3	295.607	825.975	1.48313	1.75501e-16
ENSMUSG00000002980	GSMG0035598	Bcam	basal cell adhesion molecule	2086.22	4475.2	1.10113	3.52606e-12
ENSMUSG00000003032	GSMG0027822	Klf4	Kruppel-like factor 4 (gut)	585.636	1204.72	1.03886	4.14305e-05
ENSMUSG00000003418	GSMG0022431	St8sia6	ST8 alpha-N-acetyl-neuraminide alpha-2,8-sialyltransferase 6	23.2272	147.39	2.66591	6.81744e-15
ENSMUSG00000003469	GSMG0011769	Phyhip	phytanoyl-CoA hydroxylase interacting protein	97.9735	361.939	1.88238	8.53288e-11
ENSMUSG00000003541	GSMG0016606	Ier3	immediate early response 3	332.955	1014.76	1.60777	4.37592e-21
ENSMUSG00000003617	GSMG0024133	Cp	ceruloplasmin	553.57	1265.96	1.19448	1.19504e-08
ENSMUSG00000003872	GSMG0035903	Lin7b	lin-7 homolog B (C. elegans)	779.595	1656.64	1.08813	3.03677e-11
ENSMUSG00000004098	GSMG0040424	Col5a3	collagen, type V, alpha 3	373.268	929.062	1.31391	3.96153e-09
ENSMUSG00000004748	GSMG0006267	Mtfp1	mitochondrial fission process 1	50.4498	133.122	1.39678	3.96287e-06
ENSMUSG00000004894	GSMG0025610	Hapln2	hyaluronan and proteoglycan link protein 2	12.5869	91.8045	2.85464	3.66827e-11
ENSMUSG00000005089	GSMG0021475	Slc1a2	solute carrier family 1 (glial high affinity glutamate transporter), member 2	605.141	1873.2	1.63091	2.40002e-20
ENSMUSG00000005125	GSMG0014070	Ndrg1	N-myc downstream regulated gene 1	334.222	676.406	1.02014	1.37285e-06
ENSMUSG00000005716	GSMG0014211	Pvalb	parvalbumin	1.61764	86.7136	5.75827	2.59185e-13
ENSMUSG00000006205	GSMG0035240	Htra1	HtrA serine peptidase 1	1793.18	4023.26	1.1661	3.90511e-13
ENSMUSG00000006360	GSMG0008604	Crip1	cysteine-rich protein 1 (intestinal)	543.879	1887.64	1.79464	1.98339e-19
ENSMUSG00000006522	GSMG0012172	Itih3	inter-alpha trypsin inhibitor, heavy chain 3	228.846	511.174	1.162	4.11206e-08
ENSMUSG00000007279	GSMG0036503	Scube2	signal peptide, CUB domain, EGF-like 2	120.48	312.647	1.3767	1.60537e-05
ENSMUSG00000009633	GSMG0002657	G0s2	G0/G1 switch gene 2	259.04	520.16	1.00733	7.95203e-07
ENSMUSG00000010086	GSMG0006769	Rnf112	ring finger protein 112	1460.2	4528.34	1.63295	3.13418e-25
ENSMUSG00000010529	GSMG0009334	Gm266	predicted gene 266	56.9831	185.337	1.69981	3.89657e-06
ENSMUSG00000011751	GSMG0035671	Sptbn4	spectrin beta, non-erythrocytic 4	556.379	1114.78	1.00152	0.000116728
ENSMUSG00000013523	GSMG0023950	Bcas1	breast carcinoma amplified sequence 1	102.561	302.919	1.5651	4.97347e-11
ENSMUSG00000014158	GSMG0030956	Trpv4	transient receptor potential cation channel, subfamily V, member 4	81.2299	305.983	1.91203	4.42038e-11
ENSMUSG00000014361	GSMG0021758	Mertk	c-mer proto-oncogene tyrosine kinase	129.199	423.646	1.71499	4.35518e-18
ENSMUSG00000015053	GSMG0032190	Gata2	GATA binding protein 2	1220.15	2503.71	1.03636	8.88691e-12
ENSMUSG00000015224	GSMG0028090	Cyp2j9	cytochrome P450, family 2, subfamily j, polypeptide 9	97.7508	196.312	1.00533	0.000140108
ENSMUSG00000015312	GSMG0003283	Gadd45b	growth arrest and DNA-damage-inducible 45 beta	184.353	378.203	1.03564	0.000159752
ENSMUSG00000015405	GSMG0042268	Ace2	angiotensin I converting enzyme (peptidyl-dipeptidase A) 2	927.853	2194.44	1.24261	1.48995e-12
ENSMUSG00000015647	GSMG0024007	Lama5	laminin, alpha 5	426.628	1062.24	1.3158	4.04315e-09
ENSMUSG00000015852	GSMG0025604	Fcrls	Fc receptor-like S, scavenger receptor	190.199	497.179	1.39031	1.28991e-08
ENSMUSG00000016024	GSMG0022080	Lbp	lipopolysaccharide binding protein	368.768	738.551	1.00492	0.000625037
ENSMUSG00000016194	GSMG0002654	Hsd11b1	hydroxysteroid 11-beta dehydrogenase 1	80.5687	169.014	1.06971	4.63699e-05
ENSMUSG00000017167	GSMG0005934	Cntnap1	contactin associated protein-like 1	90.9638	414.229	2.1851	3.39688e-15
ENSMUSG00000017400	GSMG0007320	Stac2	SH3 and cysteine rich domain 2	129.901	264.683	1.02898	1.25254e-05
ENSMUSG00000017692	GSMG0005624	Rhbdl3	rhomboid, veinlet-like 3 (Drosophila)	41.1622	138.572	1.74932	3.57765e-08
ENSMUSG00000018143	GSMG0029975	Mafk	v-maf musculoaponeurotic fibrosarcoma oncogene family, protein K (avian)	758.45	1572.27	1.05217	6.5204e-12
ENSMUSG00000018427	GSMG0007175	Ypel2	yippee-like 2 (Drosophila)	307.3	696.932	1.17831	1.23565e-06
ENSMUSG00000018648	GSMG0007126	Dusp14	dual specificity phosphatase 14	102.822	394.9	1.94022	6.54785e-15
ENSMUSG00000018830	GSMG0015475	Myh11	myosin, heavy polypeptide 11, smooth muscle	46.8065	283.495	2.60009	0.00110456
ENSMUSG00000019194	GSMG0035773	Scn1b	sodium channel, voltage-gated, type I, beta	262.491	858.311	1.70815	2.30729e-14
ENSMUSG00000019326	GSMG0005940	Aoc3	amine oxidase, copper containing 3	49.336	124.578	1.33797	0.000902062
ENSMUSG00000019772	GSMG0003738	Vip	vasoactive intestinal polypeptide	200.334	454.532	1.18234	2.2058e-09
ENSMUSG00000019851	GSMG0002749	Perp	PERP, TP53 apoptosis effector	376.876	1023.35	1.44116	1.31175e-16
ENSMUSG00000019866	GSMG0050837	Aim1	absent in melanoma 1	61.3115	176.974	1.524	4.61947e-08
ENSMUSG00000019872	GSMG0003015	Smpdl3a	sphingomyelin phosphodiesterase, acid-like 3A	1164.65	2369.79	1.02529	1.76697e-10
ENSMUSG00000019966	GSMG0003474	Kitl	kit ligand	1018.11	2317.2	1.18621	2.73328e-14
ENSMUSG00000019997	GSMG0002808	Ctgf	connective tissue growth factor	478.247	1473.42	1.62431	8.11757e-11
ENSMUSG00000020019	GSMG0003415	Ntn4	netrin 4	167.102	860.437	2.36606	6.97406e-34
ENSMUSG00000020023	GSMG0065007	Tmcc3	transmembrane and coiled coil domains 3	265.838	537.204	1.01648	3.81941e-08
ENSMUSG00000020044	GSMG0003352	Timp3	tissue inhibitor of metalloproteinase 3	3714.47	10284.9	1.46937	1.21393e-28
ENSMUSG00000020108	GSMG0004130	Ddit4	DNA-damage-inducible transcript 4	220.936	785.05	1.82717	2.25891e-11
ENSMUSG00000020183	GSMG0003577	Cpm	carboxypeptidase M	121.82	315.713	1.3748	6.41648e-11
ENSMUSG00000020331	GSMG0003229	Hcn2	hyperpolarization-activated, cyclic nucleotide-gated K+ 2	395.233	848.45	1.10121	0.000173565
ENSMUSG00000020377	GSMG0006613	Ltc4s	leukotriene C4 synthase	98.8707	206.136	1.05382	0.00050855
ENSMUSG00000020396	GSMG0006282	Nefh	neurofilament, heavy polypeptide	137.252	281.336	1.03332	2.78613e-06
ENSMUSG00000020423	GSMG0002111	Btg2	B cell translocation gene 2, anti-proliferative	1131.95	3394.19	1.58454	6.81501e-19
ENSMUSG00000020424	GSMG0004835	Gatsl3	GATS protein-like 3	523.372	1199.21	1.19681	3.25072e-15
ENSMUSG00000020427	GSMG0006333	Igfbp3	insulin-like growth factor binding protein 3	1283.7	6384.63	2.31454	1.43019e-41
ENSMUSG00000020591	GSMG0007856	Ntsr2	neurotensin receptor 2	381.431	4070.85	3.41688	3.44732e-95
ENSMUSG00000020660	GSMG0007784	Pomc	pro-opiomelanocortin-alpha	206.684	551.612	1.4163	2.79338e-11
ENSMUSG00000020681	GSMG0006023	Ace	angiotensin I converting enzyme (peptidyl-dipeptidase A) 1	240.656	625.527	1.37846	0.0239496
ENSMUSG00000020734	GSMG0007618	Grin2c	glutamate receptor, ionotropic, NMDA2C (epsilon 3)	40.7793	327.422	3.00942	3.09814e-20
ENSMUSG00000020773	GSMG0007651	Trim47	tripartite motif-containing 47	471.025	968.065	1.03941	2.15374e-11
ENSMUSG00000020787	GSMG0005484	P2rx1	purinergic receptor P2X, ligand-gated ion channel, 1	186.331	384.476	1.04358	2.56839e-07
ENSMUSG00000020788	GSMG0005483	Atp2a3	ATPase, Ca++ transporting, ubiquitous	2913.77	6123.12	1.07129	5.54065e-11
ENSMUSG00000020836	GSMG0005563	Coro6	coronin 6	25.9966	349.52	3.7537	4.80941e-36
ENSMUSG00000020893	GSMG0005395	Per1	period circadian clock 1	175.654	447.069	1.35073	9.10088e-07
ENSMUSG00000021097	GSMG0009263	Clmn	calmin	90.8198	336.094	1.88647	1.31175e-14
ENSMUSG00000021186	GSMG0009222	Fbln5	fibulin 5	1328.31	4081.8	1.62012	2.28488e-11
ENSMUSG00000021250	GSMG0008335	Fos	FBJ osteosarcoma oncogene	77.9217	727.821	3.21976	1.0739e-39
ENSMUSG00000021263	GSMG0009303	Degs2	delta(4)-desaturase, sphingolipid 2	91.3573	1222.67	3.74322	2.26871e-73
ENSMUSG00000021360	GSMG0009672	Gcnt2	glucosaminyl (N-acetyl) transferase 2, I-branching enzyme	707.883	1603.94	1.18009	3.28686e-12
ENSMUSG00000021367	GSMG0009688	Edn1	endothelin 1	800.328	1945.95	1.2823	5.9726e-16
ENSMUSG00000021373	GSMG0009722	Cap2	CAP, adenylate cyclase-associated protein, 2 (yeast)	95.5499	270.42	1.49905	1.971e-09
ENSMUSG00000021453	GSMG0009770	Gadd45g	growth arrest and DNA-damage-inducible 45 gamma	331.004	743.174	1.16609	3.26681e-08
ENSMUSG00000021536	GSMG0010841	Adcy2	adenylate cyclase 2	1161.34	2650.2	1.19024	2.4163e-10
ENSMUSG00000021573	GSMG0009939	Tppp	tubulin polymerization promoting protein	439.563	1406.02	1.67824	4.87607e-20
ENSMUSG00000021647	GSMG0011023	Cartpt	CART prepropeptide	42.8643	249.238	2.53675	1.4784e-20
ENSMUSG00000021668	GSMG0010985	Polk	polymerase (DNA directed), kappa	227.458	519.364	1.19291	2.35618e-10
ENSMUSG00000021680	GSMG0010975	Crhbp	corticotropin releasing hormone binding protein	22.1616	72.2388	1.70568	4.93053e-05
ENSMUSG00000021719	GSMG0011089	Rgs7bp	regulator of G-protein signalling 7 binding protein	272.132	558.563	1.03686	2.40085e-09
ENSMUSG00000021750	GSMG0012029	Fam107a	family with sequence similarity 107, member A	55.3202	718.91	3.69463	8.66963e-50
ENSMUSG00000021904	GSMG0011392	Sema3g	sema domain, immunoglobulin domain (Ig), short basic domain, secreted, (semaphorin) 3G	150.07	610.087	2.02309	2.42532e-14
ENSMUSG00000022037	GSMG0011727	Clu	clusterin	3225.11	8388.11	1.37923	1.84735e-11
ENSMUSG00000022237	GSMG0013842	Ankrd33b	ankyrin repeat domain 33B	49.1209	239.587	2.28023	6.52994e-15
ENSMUSG00000022358	GSMG0014001	Fbxo32	F-box protein 32	57.8345	131.626	1.18065	0.000254954
ENSMUSG00000022587	GSMG0013278	Ly6e	lymphocyte antigen 6 complex, locus E	4035.14	12832.1	1.66919	1.17022e-23
ENSMUSG00000022594	GSMG0014120	Lynx1	Ly6/neurotoxin 1	291.373	1567.6	2.42704	3.93484e-40
ENSMUSG00000022602	GSMG0014115	Arc	activity regulated cytoskeletal-associated protein	34.6517	834.771	4.58192	2.37614e-59
ENSMUSG00000022861	GSMG0015570	Dgkg	diacylglycerol kinase, gamma	319.98	655.726	1.03618	1.31741e-06
ENSMUSG00000022893	GSMG0015998	Adamts1	a disintegrin-like and metallopeptidase (reprolysin type) with thrombospondin type 1 motif, 1	678.818	2081.76	1.61739	3.52013e-14
ENSMUSG00000023022	GSMG0014501	Lima1	LIM domain and actin binding 1	304.894	686.755	1.17234	2.38104e-11
ENSMUSG00000023034	GSMG0013663	Nr4a1	nuclear receptor subfamily 4, group A, member 1	399.543	1983.46	2.31193	2.11874e-28
ENSMUSG00000023224	GSMG0023064	Serping1	serine (or cysteine) peptidase inhibitor, clade G, member 1	472.286	1186.71	1.33068	9.89941e-11
ENSMUSG00000023336	GSMG0037890	Wfdc1	WAP four-disulfide core domain 1	1137.65	3219.33	1.50103	2.68585e-24
ENSMUSG00000023905	GSMG0017197	Tnfrsf12a	tumor necrosis factor receptor superfamily, member 12a	428.228	1388.03	1.69717	5.24292e-25
ENSMUSG00000023959	GSMG0016696	Clic5	chloride intracellular channel 5	112.621	300.728	1.41707	3.34382e-11
ENSMUSG00000024176	GSMG0017251	Sox8	SRY (sex determining region Y)-box 8	196.301	491.596	1.32407	1.14692e-08
ENSMUSG00000024190	GSMG0017278	Dusp1	dual specificity phosphatase 1	1077.41	4407.27	2.03251	2.74191e-45
ENSMUSG00000024330	GSMG0016536	Col11a2	collagen, type XI, alpha 2	230.291	720.414	1.64535	6.98487e-09
ENSMUSG00000024395	GSMG0018171	Lims2	LIM and senescent cell antigen like domains 2	372.051	2599.74	2.80482	1.26219e-82
ENSMUSG00000024521	GSMG0018517	Pmaip1	phorbol-12-myristate-13-acetate-induced protein 1	1205.05	2516.8	1.0619	2.91145e-06
ENSMUSG00000024617	GSMG0018461	Camk2a	calcium/calmodulin-dependent protein kinase II alpha	619.399	1937.82	1.6456	3.49653e-16
ENSMUSG00000024621	GSMG0018463	Csf1r	colony stimulating factor 1 receptor	689.684	1895.26	1.45945	5.74508e-10
ENSMUSG00000024672	GSMG0020116	Ms4a7	membrane-spanning 4-domains, subfamily A, member 7	16.9804	99.0526	2.54949	1.37458e-09
ENSMUSG00000024747	GSMG0020177	Aldh1a7	aldehyde dehydrogenase family 1, subfamily A7	47.6318	162.689	1.77097	1.33646e-10
ENSMUSG00000024778	GSMG0019616	Fas	Fas (TNF receptor superfamily member 6)	58.6297	429.258	2.87623	2.62279e-29
ENSMUSG00000024965	GSMG0020032	Fermt3	fermitin family member 3	89.3543	194.769	1.13059	9.73237e-05
ENSMUSG00000024990	GSMG0020350	Rbp4	retinol binding protein 4, plasma	53.0276	173.338	1.71078	1.44448e-10
ENSMUSG00000025150	GSMG0007754	Cbr2	carbonyl reductase 2	24.1388	356.736	3.89381	6.56886e-45
ENSMUSG00000025170	GSMG0007768	Rab40b	Rab40B, member RAS oncogene family	134.506	291.556	1.11376	4.39689e-06
ENSMUSG00000025314	GSMG0023152	Ptprj	protein tyrosine phosphatase, receptor type, J	357.867	838.149	1.22818	1.27614e-07
ENSMUSG00000025324	GSMG0034558	Atp10a	ATPase, class V, type 10A	337.606	1598.69	2.24242	1.70213e-33
ENSMUSG00000025348	GSMG0003713	Itga7	integrin alpha 7	798.052	2375.33	1.57398	8.40094e-21
ENSMUSG00000025400	GSMG0003666	Tac2	tachykinin 2	35.9892	81.11	1.16866	0.00299119
ENSMUSG00000025402	GSMG0004750	Nab2	Ngfi-A binding protein 2	294.487	607.215	1.04376	3.65703e-05
ENSMUSG00000025425	GSMG0018626	St8sia5	ST8 alpha-N-acetyl-neuraminide alpha-2,8-sialyltransferase 5	46.6548	117.169	1.3338	0.0001451
ENSMUSG00000025475	GSMG0035307	Adgra1	adhesion G protein-coupled receptor A1	135.068	342.895	1.34353	1.18968e-08
ENSMUSG00000025504	GSMG0035352	Eps8l2	EPS8-like 2	60.1499	663.5	3.46679	2.7947e-53
ENSMUSG00000025537	GSMG0031121	Phkg1	phosphorylase kinase gamma 1	31.7836	114.676	1.85797	3.72388e-08
ENSMUSG00000025582	GSMG0007717	Nptx1	neuronal pentraxin 1	38.6152	127.123	1.72118	7.17799e-05
ENSMUSG00000025586	GSMG0036191	Cpeb1	cytoplasmic polyadenylation element binding protein 1	154.973	497.3	1.68215	3.96418e-13
ENSMUSG00000025739	GSMG0016382	Gng13	guanine nucleotide binding protein (G protein), gamma 13	61.5803	241.518	1.96554	2.01475e-11
ENSMUSG00000025776	GSMG0000069	Crispld1	cysteine-rich secretory protein LCCL domain containing 1	90.0506	407.587	2.18274	2.42727e-18
ENSMUSG00000025780	GSMG0020654	Itih5	inter-alpha (globulin) inhibitor H5	2147.3	5589.15	1.38034	5.85658e-21
ENSMUSG00000025784	GSMG0040275	Clec3b	C-type lectin domain family 3, member b	29.0551	155.653	2.4268	1.0872e-10
ENSMUSG00000025880	GSMG0018605	Smad7	SMAD family member 7	396.238	861.878	1.11819	0.000105777
ENSMUSG00000025887	GSMG0039111	Casp12	caspase 12	74.6975	176.738	1.24674	0.000197339
ENSMUSG00000025933	GSMG0000081	Tmem14a	transmembrane protein 14A	119.485	246.188	1.03763	6.55279e-05
ENSMUSG00000026062	GSMG0000186	Slc9a2	solute carrier family 9 (sodium/hydrogen exchanger), member 2	82.522	198.48	1.27101	4.48402e-05
ENSMUSG00000026090	GSMG0001489	2010300C02Rik	RIKEN cDNA 2010300C02 gene	49.9279	132.856	1.40824	9.7639e-06
ENSMUSG00000026141	GSMG0001406	Col19a1	collagen, type XIX, alpha 1	759.17	1530.95	1.01153	2.13734e-08
ENSMUSG00000026170	GSMG0000433	Cyp27a1	cytochrome P450, family 27, subfamily a, polypeptide 1	51.9599	169.231	1.70303	1.96659e-08
ENSMUSG00000026173	GSMG0000429	Plcd4	phospholipase C, delta 4	123.951	276.597	1.16433	3.94199e-05
ENSMUSG00000026202	GSMG0001771	Tuba4a	tubulin, alpha 4A	199.045	455.671	1.19644	1.16521e-08
ENSMUSG00000026222	GSMG0000490	Sp100	nuclear antigen Sp100	129.574	380.744	1.55527	2.21038e-11
ENSMUSG00000026365	GSMG0002181	Cfh	complement component factor h	335.759	1103.38	1.7185	7.86775e-18
ENSMUSG00000026424	GSMG0002127	Gpr37l1	G protein-coupled receptor 37-like 1	885.656	2954.73	1.73866	3.82348e-26
ENSMUSG00000026473	GSMG0000905	Glul	glutamate-ammonia ligase (glutamine synthetase)	1597.83	3255.97	1.0277	1.94523e-07
ENSMUSG00000026579	GSMG0000982	F5	coagulation factor V	50.1477	201.883	2.01012	0.0410142
ENSMUSG00000026656	GSMG0002439	Fcgr2b	Fc receptor, IgG, low affinity IIb	33.8968	126.392	1.90663	4.54405e-08
ENSMUSG00000026712	GSMG0020688	Mrc1	mannose receptor, C type 1	311.283	741.651	1.25208	8.81927e-10
ENSMUSG00000026822	GSMG0022641	Lcn2	lipocalin 2	51.8324	113.954	1.13373	0.000418522
ENSMUSG00000026837	GSMG0020843	Col5a1	collagen, type V, alpha 1	1795.23	3964.19	1.14298	7.81753e-09
ENSMUSG00000026870	GSMG0020953	Cutal	cutA divalent cation tolerance homolog-like	130.61	310.964	1.25174	3.8158e-08
ENSMUSG00000026879	GSMG0020958	Gsn	gelsolin	287.775	969.438	1.75326	1.66426e-15
ENSMUSG00000026959	GSMG0022525	Grin1	glutamate receptor, ionotropic, NMDA1 (zeta 1)	1073.17	2258.24	1.07354	4.85268e-07
ENSMUSG00000027007	GSMG0021284	Ssfa2	sperm specific antigen 2	977.495	2093	1.09861	2.09506e-11
ENSMUSG00000027134	GSMG0021551	Lpcat4	lysophosphatidylcholine acyltransferase 4	995.502	2075.94	1.05975	6.04482e-12
ENSMUSG00000027188	GSMG0021474	Pamr1	peptidase domain containing associated with muscle regeneration 1	97.63	276.352	1.50615	1.09254e-09
ENSMUSG00000027257	GSMG0021387	Pacsin3	protein kinase C and casein kinase substrate in neurons 3	247.124	630.284	1.3511	2.36771e-11
ENSMUSG00000027270	GSMG0021849	Lamp5	lysosomal-associated membrane protein family, member 5	78.1209	489.112	2.64924	4.01202e-31
ENSMUSG00000027296	GSMG0021636	Itpka	inositol 1,4,5-trisphosphate 3-kinase A	260.49	703.09	1.43124	1.05218e-08
ENSMUSG00000027297	GSMG0023401	Ltk	leukocyte tyrosine kinase	74.5691	304.908	2.03377	5.01255e-10
ENSMUSG00000027347	GSMG0023366	Rasgrp1	RAS guanyl releasing protein 1	275.543	784.449	1.51037	1.47718e-19
ENSMUSG00000027375	GSMG0023496	Mal	myelin and lymphocyte protein, T cell differentiation protein	741.044	3626.21	2.29081	2.01697e-44
ENSMUSG00000027400	GSMG0023525	Pdyn	prodynorphin	129.004	265.984	1.04601	0.000151734
ENSMUSG00000027457	GSMG0023693	Snph	syntaphilin	944.53	2120.42	1.16682	9.08232e-11
ENSMUSG00000027463	GSMG0021964	Slc52a3	solute carrier protein family 52, member 3	836.524	2015.6	1.26896	8.47768e-13
ENSMUSG00000027489	GSMG0023736	Necab3	N-terminal EF-hand calcium binding protein 3	375.816	866.533	1.20663	3.01813e-10
ENSMUSG00000027524	GSMG0022266	Edn3	endothelin 3	236.453	1231.29	2.38227	5.22067e-34
ENSMUSG00000027579	GSMG0024034	Srms	src-related kinase lacking C-terminal regulatory tyrosine and N-terminal myristylation sites	63.1768	129.226	1.03937	0.00192536
ENSMUSG00000027792	GSMG0025512	Bche	butyrylcholinesterase	338.289	849.594	1.32812	8.38606e-12
ENSMUSG00000027800	GSMG0025433	Tm4sf1	transmembrane 4 superfamily member 1	2902.99	8951.08	1.62469	2.11519e-24
ENSMUSG00000027861	GSMG0024736	Casq2	calsequestrin 2	106.794	563.826	2.39971	2.51227e-27
ENSMUSG00000027895	GSMG0025897	Kcnc4	potassium voltage gated channel, Shaw-related subfamily, member 4	107.902	231.295	1.09844	0.000451712
ENSMUSG00000027947	GSMG0025634	Il6ra	interleukin 6 receptor, alpha	56.6851	137.065	1.27548	0.000983761
ENSMUSG00000027962	GSMG0025967	Vcam1	vascular cell adhesion molecule 1	998.758	2481.05	1.31333	3.31139e-11
ENSMUSG00000027994	GSMG0026058	Ccdc109b	coiled-coil domain containing 109B	31.1685	88.9054	1.51643	0.000117984
ENSMUSG00000028088	GSMG0024702	Fmo5	flavin containing monooxygenase 5	87.2042	203.386	1.22276	1.63389e-05
ENSMUSG00000028128	GSMG0024874	F3	coagulation factor III	161.737	471.156	1.54607	6.31147e-14
ENSMUSG00000028195	GSMG0026162	Cyr61	cysteine rich protein 61	671.725	2075.4	1.62806	9.95688e-16
ENSMUSG00000028197	GSMG0025064	Col24a1	collagen, type XXIV, alpha 1	324.018	918.518	1.50299	1.26621e-10
ENSMUSG00000028214	GSMG0026285	Gem	GTP binding protein (gene overexpressed in skeletal muscle)	63.4074	127.639	1.01262	0.00101302
ENSMUSG00000028222	GSMG0026306	Calb1	calbindin 1	101.171	282.391	1.4766	1.5119e-06
ENSMUSG00000028259	GSMG0027620	Fhl5	four and a half LIM domains 5	18.1234	92.3891	2.3515	1.39878e-09
ENSMUSG00000028328	GSMG0026523	Tmod1	tropomodulin 1	19.8353	89.182	2.15494	4.88073e-07
ENSMUSG00000028434	GSMG0027837	Epb41l4b	erythrocyte membrane protein band 4.1 like 4b	28.812	93.6679	1.69018	0.000665836
ENSMUSG00000028464	GSMG0027729	Tpm2	tropomyosin 2, beta	295.576	968.88	1.71378	6.24636e-15
ENSMUSG00000028573	GSMG0026750	Fggy	FGGY carbohydrate kinase domain containing	14.3969	136.851	3.25209	0.010583
ENSMUSG00000028645	GSMG0026997	Slc2a1	solute carrier family 2 (facilitated glucose transporter), member 1	14860.7	31397.2	1.07918	5.15497e-11
ENSMUSG00000028758,ENSMUSG00000045349	GSMG0027272	Sh2d5 // Kif17	SH2 domain containing 5 // kinesin family member 17	93.2542	235.84	1.3384	3.88761e-07
ENSMUSG00000028766	GSMG0028539	Alpl	alkaline phosphatase, liver/bone/kidney	369.531	1158.14	1.64964	9.38873e-23
ENSMUSG00000028776	GSMG0028418	Tinagl1	tubulointerstitial nephritis antigen-like 1	413.315	1320	1.67617	8.17698e-19
ENSMUSG00000028780	GSMG0028856	Sema3c	sema domain, immunoglobulin domain (Ig), short basic domain, secreted, (semaphorin) 3C	547.183	4287.35	2.97022	2.03133e-75
ENSMUSG00000028838	GSMG0028490	Extl1	exostoses (multiple)-like 1	50.7505	245.968	2.28216	1.95391e-16
ENSMUSG00000028862	GSMG0027185	Map3k6	mitogen-activated protein kinase kinase kinase 6	105.088	280.101	1.41037	2.00177e-06
ENSMUSG00000028876	GSMG0051016	Epha10	Eph receptor A10	116.123	274.871	1.2404	8.23638e-06
ENSMUSG00000028931	GSMG0028715	Kcnab2	potassium voltage-gated channel, shaker-related subfamily, beta member 2	110.301	250.03	1.18103	0.000327517
ENSMUSG00000028957	GSMG0028691	Per3	period circadian clock 3	474.915	1133.32	1.25445	8.78298e-15
ENSMUSG00000029054	GSMG0028745	Gabrd	gamma-aminobutyric acid (GABA) A receptor, subunit delta	116.684	455.761	1.96714	1.58188e-21
ENSMUSG00000029086	GSMG0030436	Prom1	prominin 1	4974.61	13892.3	1.48167	4.6257e-28
ENSMUSG00000029151	GSMG0030319	Slc30a3	solute carrier family 30 (zinc transporter), member 3	189.373	1030.15	2.44432	2.24589e-30
ENSMUSG00000029228	GSMG0030635	Lnx1	ligand of numb-protein X 1	151.655	434.287	1.51989	2.36649e-12
ENSMUSG00000029359	GSMG0051991	Tesc	tescalcin	36.4158	205.932	2.4902	1.20468e-14
ENSMUSG00000029373	GSMG0029399	Pf4	platelet factor 4	181.834	403.538	1.15218	2.5737e-07
ENSMUSG00000029468	GSMG0029777	P2rx7	purinergic receptor P2X, ligand-gated ion channel, 7	63.264	144.869	1.20124	0.000106706
ENSMUSG00000029530	GSMG0040282	Ccr9	chemokine (C-C motif) receptor 9	349.421	762.94	1.1257	1.22521e-11
ENSMUSG00000029675	GSMG0031184	Eln	elastin	2335.19	8565.24	1.87496	0.00249174
ENSMUSG00000030048	GSMG0033321	Gkn3	gastrokine 3	173.95	1130.68	2.70293	1.1932e-26
ENSMUSG00000030096	GSMG0032228	Slc6a6	solute carrier family 6 (neurotransmitter transporter, taurine), member 6	15284.5	33069.4	1.11346	1.08019e-14
ENSMUSG00000030170	GSMG0033603	Wnt5b	wingless-type MMTV integration site family, member 5B	87.0311	203.734	1.22663	8.93842e-07
ENSMUSG00000030218	GSMG0033825	Mgp	matrix Gla protein	826.034	3738.8	2.17867	7.61313e-51
ENSMUSG00000030237	GSMG0033846	Slco1a4	solute carrier organic anion transporter family, member 1a4	3566.88	18971.6	2.41112	1.02973e-62
ENSMUSG00000030270	GSMG0032328	Cpne9	copine family member IX	98.3459	292.537	1.57572	2.38104e-11
ENSMUSG00000030494	GSMG0034347	Rhpn2	rhophilin, Rho GTPase binding protein 2	91.5367	300.626	1.71918	9.53666e-13
ENSMUSG00000030616	GSMG0034772	Sytl2	synaptotagmin-like 2	227.016	545.709	1.26807	1.76796e-09
ENSMUSG00000030621	GSMG0034761	Me3	malic enzyme 3, NADP(+)-dependent, mitochondrial	189.277	388.024	1.037	4.67444e-06
ENSMUSG00000030688	GSMG0034898	Stard10	START domain containing 10	83.148	187.233	1.16944	9.43694e-05
ENSMUSG00000030701	GSMG0036331	Plekhb1	pleckstrin homology domain containing, family B (evectins) member 1	365.548	748.56	1.03427	1.59679e-07
ENSMUSG00000030703	GSMG0035173	Gdpd3	glycerophosphodiester phosphodiesterase domain containing 3	19.5684	186.622	3.25454	1.50441e-20
ENSMUSG00000030711	GSMG0036659	Sult1a1	sulfotransferase family 1A, phenol-preferring, member 1	223.062	630.289	1.50106	3.47895e-15
ENSMUSG00000030898	GSMG0034975	Cckbr	cholecystokinin B receptor	39.14	274.512	2.81856	1.95325e-23
ENSMUSG00000031147	GSMG0042321	Magix	MAGI family member, X-linked	26.9572	67.5918	1.32565	0.00185394
ENSMUSG00000031355	GSMG0042285	Arhgap6	Rho GTPase activating protein 6	104.369	216.263	1.05475	1.42721e-05
ENSMUSG00000031377	GSMG0043007	Bmx	BMX non-receptor tyrosine kinase	115.974	945.717	3.0283	4.26398e-32
ENSMUSG00000031379	GSMG0042269	Pir	pirin	279.739	617.534	1.14458	8.85263e-09
ENSMUSG00000031425	GSMG0042127	Plp1	proteolipid protein (myelin) 1	131.005	2913.5	4.47658	1.02984e-114
ENSMUSG00000031431	GSMG0042876	Tsc22d3	TSC22 domain family, member 3	3871.71	8339.73	1.10714	9.25729e-11
ENSMUSG00000031451	GSMG0038114	Gas6	growth arrest specific 6	2843.95	5705.24	1.00452	2.95215e-11
ENSMUSG00000031520	GSMG0037277	Vegfc	vascular endothelial growth factor C	242.407	874.684	1.85329	2.57343e-23
ENSMUSG00000031613	GSMG0037292	Hpgd	hydroxyprostaglandin dehydrogenase 15 (NAD)	28.7566	58.361	1.03377	0.0433874
ENSMUSG00000031636	GSMG0037245	Pdlim3	PDZ and LIM domain 3	4.83708	68.541	3.83537	9.61372e-12
ENSMUSG00000031750	GSMG0038913	Il34	interleukin 34	405.059	1004.69	1.31245	1.63922e-12
ENSMUSG00000031762	GSMG0037632	Mt2	metallothionein 2	204.192	521.628	1.35172	3.95653e-11
ENSMUSG00000031765	GSMG0037633	Mt1	metallothionein 1	930.854	2266.31	1.28331	1.43307e-20
ENSMUSG00000031775	GSMG0038782	Pllp	plasma membrane proteolipid	406.256	1579.66	1.95796	1.56181e-25
ENSMUSG00000031778	GSMG0037651	Cx3cl1	chemokine (C-X3-C motif) ligand 1	3181.22	7504.11	1.23807	6.01159e-12
ENSMUSG00000031780	GSMG0037652	Ccl17	chemokine (C-C motif) ligand 17	24.8444	54.8188	1.1343	0.0157345
ENSMUSG00000031791	GSMG0053359	Tmem38a	transmembrane protein 38A	153.51	333.862	1.12093	4.04802e-06
ENSMUSG00000031825	GSMG0037896	Crispld2	cysteine-rich secretory protein LCCL domain containing 2	54.1223	393.1	2.86574	3.37084e-23
ENSMUSG00000031880	GSMG0038829	Rrad	Ras-related associated with diabetes	128.672	347.546	1.43529	7.50705e-12
ENSMUSG00000031883	GSMG0037694	Car7	carbonic anhydrase 7	55.7191	261.788	2.23466	1.69439e-19
ENSMUSG00000031886	GSMG0037702	Ces2e	carboxylesterase 2E	72.8205	145.999	1.00463	0.000898825
ENSMUSG00000031958	GSMG0038932	Ldhd	lactate dehydrogenase D	62.4261	214.392	1.7827	3.02786e-09
ENSMUSG00000031980	GSMG0039058	Agt	angiotensinogen (serpin peptidase inhibitor, clade A, member 8)	254.264	644.987	1.34484	4.89262e-07
ENSMUSG00000032006	GSMG0039112	Pdgfd	platelet-derived growth factor, D polypeptide	262.549	680.457	1.37421	8.46125e-12
ENSMUSG00000032010	GSMG0039425	Usp2	ubiquitin specific peptidase 2	275.954	617.479	1.16169	4.67999e-10
ENSMUSG00000032011	GSMG0039424	Thy1	thymus cell antigen 1, theta	363.565	868.615	1.2544	2.09506e-11
ENSMUSG00000032085	GSMG0040695	Tagln	transgelin	201.83	1182.91	2.55369	8.25621e-32
ENSMUSG00000032128	GSMG0040581	Robo3	roundabout guidance receptor 3	194.05	1076.35	2.47236	2.4917e-30
ENSMUSG00000032174	GSMG0039209	Icam5	intercellular adhesion molecule 5, telencephalin	737.55	2484.18	1.75172	2.69029e-17
ENSMUSG00000032278	GSMG0040880	Paqr5	progestin and adipoQ receptor family member V	86.46	685.052	2.988	1.7389e-55
ENSMUSG00000032323	GSMG0065174	Cyp11a1	cytochrome P450, family 11, subfamily a, polypeptide 1	33.9015	196.993	2.54831	1.30743e-16
ENSMUSG00000032356	GSMG0039904	Rasgrf1	RAS protein-specific guanine nucleotide-releasing factor 1	174.8	1179.09	2.75516	2.94977e-46
ENSMUSG00000032372	GSMG0039912	Plscr2	phospholipid scramblase 2	44.4492	100.551	1.17838	0.00104308
ENSMUSG00000032377	GSMG0039915	Plscr4	phospholipid scramblase 4	56.8682	261.862	2.20559	6.15261e-18
ENSMUSG00000032517	GSMG0040235	Mobp	myelin-associated oligodendrocytic basic protein	0.657496	1794.45	11.4567	3.89196e-26
ENSMUSG00000032523	GSMG0041467	Hhatl	hedgehog acyltransferase-like	20.8348	144.301	2.80479	2.15899e-13
ENSMUSG00000032528	GSMG0040248	Vipr1	vasoactive intestinal peptide receptor 1	31.883	135.574	2.08602	1.2199e-08
ENSMUSG00000032652	GSMG0032568	Crebl2	cAMP responsive element binding protein-like 2	178.009	365.515	1.03701	4.96356e-07
ENSMUSG00000032796	GSMG0016872	Lama1	laminin, alpha 1	664	1364.08	1.03906	5.07993e-08
ENSMUSG00000032854	GSMG0026022	Ugt8a	UDP galactosyltransferase 8A	42.952	176.828	2.04457	5.08206e-10
ENSMUSG00000032908	GSMG0000457	Sgpp2	sphingosine-1-phosphate phosphotase 2	161.433	1345.81	3.06043	1.16293e-48
ENSMUSG00000033083	GSMG0012801	Tbc1d4	TBC1 domain family, member 4	130.786	350.607	1.41851	3.47208e-08
ENSMUSG00000033107	GSMG0018105	Rnf125	ring finger protein 125	271.554	596.054	1.13642	1.73509e-06
ENSMUSG00000033174	GSMG0032194	Mgll	monoglyceride lipase	2813.35	5836.31	1.05267	1.70825e-15
ENSMUSG00000033208	GSMG0003177	S100b	S100 protein, beta polypeptide, neural	161.636	568.621	1.81253	9.53077e-22
ENSMUSG00000033470	GSMG0012641	Cysltr2	cysteinyl leukotriene receptor 2	106.214	322.843	1.60207	1.91909e-11
ENSMUSG00000033579	GSMG0038930	Fa2h	fatty acid 2-hydroxylase	13.3535	117.21	3.13042	1.33763e-13
ENSMUSG00000033594	GSMG0043542	Spata2l	spermatogenesis associated 2-like	566.906	1873.65	1.72476	2.20495e-23
ENSMUSG00000033595	GSMG0011770	Lgi3	leucine-rich repeat LGI family, member 3	53.0695	309.962	2.54842	3.65706e-20
ENSMUSG00000033805	GSMG0029544	Ephx4	epoxide hydrolase 4	65.7296	175.006	1.40861	8.98541e-07
ENSMUSG00000033863	GSMG0019532	Klf9	Kruppel-like factor 9	1011.01	3214.6	1.66926	7.07921e-32
ENSMUSG00000033998	GSMG0038001	Kcnk1	potassium channel, subfamily K, member 1	332.585	781.396	1.23284	1.96241e-08
ENSMUSG00000034059	GSMG0021310	Ypel4	yippee-like 4 (Drosophila)	42.8224	166.529	1.95756	3.7329e-11
ENSMUSG00000034265	GSMG0016166	Zdhhc14	zinc finger, DHHC domain containing 14	112.485	231.405	1.04001	4.68164e-05
ENSMUSG00000034310	GSMG0031106	Tmem132d	transmembrane protein 132D	157.674	880.228	2.48235	3.44498e-37
ENSMUSG00000034330	GSMG0037876	Plcg2	phospholipase C, gamma 2	102.137	300.431	1.55916	1.20669e-11
ENSMUSG00000034353	GSMG0000571	Ramp1	receptor (calcitonin) activity modifying protein 1	654.886	1323.61	1.01519	1.71489e-09
ENSMUSG00000034472	GSMG0037467	Rasd2	RASD family, member 2	138.631	531.299	1.93743	9.61886e-18
ENSMUSG00000034570	GSMG0006258	Inpp5j	inositol polyphosphate 5-phosphatase J	527.607	1513.8	1.52062	6.20006e-18
ENSMUSG00000034656	GSMG0037536	Cacna1a	calcium channel, voltage-dependent, P/Q type, alpha 1A subunit	1286.41	2726.43	1.08344	1.43098e-07
ENSMUSG00000034801	GSMG0008953	Sos2	son of sevenless homolog 2 (Drosophila)	643.493	1397.76	1.11781	3.42531e-06
ENSMUSG00000034930	GSMG0032114	Rtkn	rhotekin	161.124	326.179	1.0168	7.82697e-06
ENSMUSG00000034981	GSMG0029415	Parm1	prostate androgen-regulated mucin-like protein 1	160.537	333.056	1.05682	1.11219e-05
ENSMUSG00000035237	GSMG0038859	Lcat	lecithin cholesterol acyltransferase	84.3185	267.369	1.67141	2.25653e-10
ENSMUSG00000035283	GSMG0019850	Adrb1	adrenergic receptor, beta 1	259.609	863.987	1.73228	1.08555e-14
ENSMUSG00000035352	GSMG0005642	Ccl12	chemokine (C-C motif) ligand 12	23.6635	134.406	2.51617	6.97779e-09
ENSMUSG00000035783	GSMG0020318	Acta2	actin, alpha 2, smooth muscle, aorta	935.957	5744.17	2.61775	2.88825e-08
ENSMUSG00000036046	GSMG0014337	5031439G07Rik	RIKEN cDNA 5031439G07 gene	977.218	2647.26	1.4376	8.15801e-14
ENSMUSG00000036095	GSMG0007990	Dgkb	diacylglycerol kinase, beta	235.873	587.397	1.31522	1.70628e-12
ENSMUSG00000036225	GSMG0018732	Kctd1	potassium channel tetramerisation domain containing 1	110.678	226.884	1.03444	1.45842e-05
ENSMUSG00000036353	GSMG0025456	P2ry12	purinergic receptor P2Y, G-protein coupled 12	312.326	1104.66	1.82406	2.18131e-16
ENSMUSG00000036362	GSMG0025455	P2ry13	purinergic receptor P2Y, G-protein coupled 13	136.978	419.531	1.61849	2.71735e-11
ENSMUSG00000036381	GSMG0025453	P2ry14	purinergic receptor P2Y, G-protein coupled, 14	759.576	2018.66	1.41032	3.83016e-13
ENSMUSG00000036446	GSMG0003453	Lum	lumican	140.102	707.596	2.33773	1.33745e-18
ENSMUSG00000036459	GSMG0035782	Wtip	WT1-interacting protein	318.516	898.921	1.49645	0.0243018
ENSMUSG00000036466	GSMG0039665	Megf11	multiple EGF-like-domains 11	25.3391	80.0584	1.65716	0.000119413
ENSMUSG00000036560	GSMG0034324	Lgi4	leucine-rich repeat LGI family, member 4	18.4629	116.846	2.66421	8.94993e-12
ENSMUSG00000036634	GSMG0035762	Mag	myelin-associated glycoprotein	43.525	1399.99	5.00922	2.0713e-93
ENSMUSG00000036814	GSMG0041491	Slc6a20a	solute carrier family 6 (neurotransmitter transporter), member 20A	1978.47	4062.36	1.03841	4.57897e-09
ENSMUSG00000036867	GSMG0040910	Smad6	SMAD family member 6	382.815	1104.22	1.5265	1.57359e-17
ENSMUSG00000036887	GSMG0028528	C1qa	complement component 1, q subcomponent, alpha polypeptide	272.338	755.77	1.47544	3.74226e-14
ENSMUSG00000036896	GSMG0028527	C1qc	complement component 1, q subcomponent, C chain	409.601	1109.75	1.4397	2.04194e-17
ENSMUSG00000036905	GSMG0028526	C1qb	complement component 1, q subcomponent, beta polypeptide	308.458	1000.6	1.70035	7.26248e-17
ENSMUSG00000036949	GSMG0020689	Slc39a12	solute carrier family 39 (zinc transporter), member 12	136.696	404.632	1.56883	6.04482e-12
ENSMUSG00000037224	GSMG0030371	Zfyve28	zinc finger, FYVE domain containing 28	147.368	325.904	1.14578	8.93267e-05
ENSMUSG00000037370	GSMG0003905	Enpp1	ectonucleotide pyrophosphatase/phosphodiesterase 1	146.83	494.379	1.7537	3.577e-19
ENSMUSG00000037428	GSMG0029928	Vgf	VGF nerve growth factor inducible	472.874	1012.47	1.09657	0.000127223
ENSMUSG00000037447	GSMG0000137	Arid5a	AT rich interactive domain 5A (MRF1-like)	131.092	332.957	1.34782	5.08358e-09
ENSMUSG00000037573	GSMG0005781	Tob1	transducer of ErbB-2.1	1135.8	2508.19	1.14255	5.60306e-13
ENSMUSG00000037580	GSMG0012315	Gch1	GTP cyclohydrolase 1	649.81	1311.5	1.01317	2.63796e-09
ENSMUSG00000037625	GSMG0024186	Cldn11	claudin 11	133.952	299.535	1.15573	4.00869e-05
ENSMUSG00000037661	GSMG0024181	Gpr160	G protein-coupled receptor 160	77.8872	245.661	1.66212	7.49108e-09
ENSMUSG00000037664	GSMG0036912	Cdkn1c	cyclin-dependent kinase inhibitor 1C (P57)	1057.7	2540.66	1.26426	2.47061e-12
ENSMUSG00000037703	GSMG0023542	Lzts3	leucine zipper, putative tumor suppressor family member 3	489.371	1216.12	1.31216	2.12215e-09
ENSMUSG00000037855	GSMG0004204	Zfp365	zinc finger protein 365	175.373	419.277	1.25697	3.39818e-09
ENSMUSG00000037996	GSMG0028023	Slc24a2	solute carrier family 24 (sodium/potassium/calcium exchanger), member 2	162.026	450.698	1.47851	1.06774e-11
ENSMUSG00000038007	GSMG0026717	Acer2	alkaline ceramidase 2	567.336	4564.31	3.00839	6.72407e-59
ENSMUSG00000038026	GSMG0002471	Kcnj9	potassium inwardly-rectifying channel, subfamily J, member 9	388.679	1092.62	1.48951	8.99514e-12
ENSMUSG00000038094	GSMG0015618	Atp13a4	ATPase type 13A4	32.2686	75.7595	1.23246	0.00387437
ENSMUSG00000038173	GSMG0037260	Enpp6	ectonucleotide pyrophosphatase/phosphodiesterase 6	22.688	115.277	2.35665	9.01172e-09
ENSMUSG00000038370	GSMG0002444	Pcp4l1	Purkinje cell protein 4-like 1	39.6639	139.412	1.81291	1.12315e-07
ENSMUSG00000038418	GSMG0018220	Egr1	early growth response 1	1146.14	5071.26	2.14525	8.51785e-44
ENSMUSG00000038451	GSMG0032468	Spsb2	splA/ryanodine receptor domain and SOCS box containing 2	100.69	209.104	1.05269	3.39785e-05
ENSMUSG00000038496	GSMG0001823	Slc19a3	solute carrier family 19, member 3	477.693	1580.96	1.72675	3.14799e-26
ENSMUSG00000038530	GSMG0002422	Rgs4	regulator of G-protein signaling 4	4923.44	9886.84	1.00594	2.69041e-08
ENSMUSG00000038546	GSMG0010591	Ranbp9	RAN binding protein 9	219.538	519.486	1.24086	3.53223e-05
ENSMUSG00000038583	GSMG0002996	Pln	phospholamban	122.882	254.005	1.04895	9.03135e-06
ENSMUSG00000038642	GSMG0024658	Ctss	cathepsin S	175.147	466.942	1.41885	1.4474e-10
ENSMUSG00000038776	GSMG0002562	Ephx1	epoxide hydrolase 1, microsomal	523.112	1520.72	1.5404	2.81408e-15
ENSMUSG00000039059	GSMG0024005	Hrh3	histamine receptor H3	136.03	373.351	1.45661	3.81831e-09
ENSMUSG00000039109	GSMG0010552	F13a1	coagulation factor XIII, A1 subunit	38.6883	213.7	2.47036	1.74411e-17
ENSMUSG00000039114	GSMG0010550	Nrn1	neuritin 1	71.8872	566.559	2.9782	6.01558e-45
ENSMUSG00000039405	GSMG0036247	Prss23	protease, serine 23	545.285	2140.93	1.97348	3.35795e-33
ENSMUSG00000039546	GSMG0028719	Ajap1	adherens junction associated protein 1	226.153	503.26	1.15231	0.00037519
ENSMUSG00000039879	GSMG0003843	Heca	hdc homolog, cell cycle regulator	109.237	271.941	1.31159	0.000831264
ENSMUSG00000040055	GSMG0012464	Gjb6	gap junction protein, beta 6	79.591	165.958	1.05978	0.000194853
ENSMUSG00000040441	GSMG0043694	Slc26a10	solute carrier family 26, member 10	41.5356	357.594	3.10828	2.24601e-34
ENSMUSG00000040451	GSMG0020307	Sgms1	sphingomyelin synthase 1	3557.77	10207.3	1.52073	4.63548e-22
ENSMUSG00000040488	GSMG0035669	Ltbp4	latent transforming growth factor beta binding protein 4	5088.36	24076.4	2.24232	7.87706e-29
ENSMUSG00000040543	GSMG0006931	Pitpnm3	PITPNM family member 3	107.31	305.196	1.50487	1.92557e-06
ENSMUSG00000040562	GSMG0025914	Gstm2	glutathione S-transferase, mu 2	102.071	208.46	1.03316	0.000465098
ENSMUSG00000040584	GSMG0028802	Abcb1a	ATP-binding cassette, sub-family B (MDR/TAP), member 1A	1612.23	3746.35	1.21656	7.19032e-15
ENSMUSG00000040724	GSMG0024798	Kcna2	potassium voltage-gated channel, shaker-related subfamily, member 2	656.11	1316.44	1.00455	3.99689e-08
ENSMUSG00000040747	GSMG0025888	Cd53	CD53 antigen	49.0557	109.4	1.16525	0.00396423
ENSMUSG00000040759	GSMG0011583	Cmtm5	CKLF-like MARVEL transmembrane domain containing 5	220.609	717.099	1.7022	3.28518e-21
ENSMUSG00000040852	GSMG0016992	Plekhh2	pleckstrin homology domain containing, family H (with MyTH4 domain) member 2	363.558	892.42	1.29424	5.29989e-12
ENSMUSG00000040860	GSMG0028579	Crocc	ciliary rootlet coiled-coil, rootletin	392.976	983.956	1.32501	9.15609e-15
ENSMUSG00000041205	GSMG0015539	Map6d1	MAP6 domain containing 1	129.627	470.523	1.85763	5.01798e-22
ENSMUSG00000041479	GSMG0011427	Syt15	synaptotagmin XV	143.545	408.589	1.51109	9.16191e-11
ENSMUSG00000041556	GSMG0027378	Fbxo2	F-box protein 2	119.948	326.102	1.44504	1.86949e-07
ENSMUSG00000041577	GSMG0002110	Prelp	proline arginine-rich end leucine-rich repeat	103.556	377.015	1.86723	1.52737e-14
ENSMUSG00000041607	GSMG0018647	Mbp	myelin basic protein	609.275	42553.6	6.12654	1.41897e-221
ENSMUSG00000041736	GSMG0013456	Tspo	translocator protein	530.151	1096.86	1.04884	2.45814e-11
ENSMUSG00000041771	GSMG0008451	Slc24a4	solute carrier family 24 (sodium/potassium/calcium exchanger), member 4	20.9264	66.4618	1.66308	0.00268784
ENSMUSG00000041794	GSMG0040236	Myrip	myosin VIIA and Rab interacting protein	253.318	608.299	1.26324	2.74909e-07
ENSMUSG00000042485	GSMG0011384	Mustn1	musculoskeletal, embryonic nuclear protein 1	71.4013	305.318	2.09996	1.67239e-17
ENSMUSG00000042644	GSMG0016421	Itpr3	inositol 1,4,5-triphosphate receptor 3	86.0652	191.14	1.15138	0.000144473
ENSMUSG00000042647	GSMG0031039	Acad12	acyl-Coenzyme A dehydrogenase family, member 12	84.6956	210.403	1.31694	6.4111e-07
ENSMUSG00000042797	GSMG0036285	Aqp11	aquaporin 11	609.893	1370.58	1.16829	3.6517e-09
ENSMUSG00000042817	GSMG0031376	Flt3	FMS-like tyrosine kinase 3	47.9135	205.908	2.10396	3.76049e-16
ENSMUSG00000043079	GSMG0019008	Synpo	synaptopodin	254.125	668.64	1.39557	2.73188e-11
ENSMUSG00000043164	GSMG0025256	Tmem212	transmembrane protein 212	27.8769	65.1071	1.2186	0.00472028
ENSMUSG00000043366	GSMG0036368	Olfr78	olfactory receptor 78	73.9952	461.884	2.64844	9.34703e-24
ENSMUSG00000043822	GSMG0004333	Adamtsl5	ADAMTS-like 5	34.455	84.4446	1.29903	0.00135179
ENSMUSG00000044005	GSMG0003682	Gls2	glutaminase 2 (liver, mitochondrial)	88.5458	233.692	1.40325	4.04641e-07
ENSMUSG00000044037	GSMG0040152	Als2cl	ALS2 C-terminal like	365.926	831.731	1.18366	2.44669e-08
ENSMUSG00000044197	GSMG0029969	Gpr146	G protein-coupled receptor 146	1645.09	3480.24	1.08108	1.15279e-13
ENSMUSG00000044216	GSMG0014249	Kcnj4	potassium inwardly-rectifying channel, subfamily J, member 4	112.684	286.992	1.34353	2.39175e-05
ENSMUSG00000044337	GSMG0000561	Ackr3	atypical chemokine receptor 3	1421.76	7112.41	2.32279	1.02125e-34
ENSMUSG00000044345	GSMG0019701	Marveld1	MARVEL (membrane-associating) domain containing 1	277.036	684.289	1.30285	2.88825e-08
ENSMUSG00000044349	GSMG0022081	Snhg11	small nucleolar RNA host gene 11	52717.2	119405	1.17952	2.6908e-17
ENSMUSG00000044676	GSMG0037809	Zfp612	zinc finger protein 612	702.781	1418.02	1.01268	1.13296e-09
ENSMUSG00000044786	GSMG0035695	Zfp36	zinc finger protein 36	195.555	463.076	1.24311	2.01904e-10
ENSMUSG00000045573	GSMG0027524	Penk	preproenkephalin	60.0176	139.508	1.21458	0.0111412
ENSMUSG00000045730	GSMG0019032	Adrb2	adrenergic receptor, beta 2	242.687	733.192	1.59498	1.77825e-18
ENSMUSG00000045903	GSMG0019959	Npas4	neuronal PAS domain protein 4	29.175	125.611	2.09988	7.76594e-08
ENSMUSG00000046093	GSMG0027032	Hpcal4	hippocalcin-like 4	1414.75	3288.12	1.21682	1.03326e-13
ENSMUSG00000046447	GSMG0027277	Camk2n1	calcium/calmodulin-dependent protein kinase II inhibitor 1	810.65	2614.59	1.68862	1.12391e-24
ENSMUSG00000046818	GSMG0024995	Ddit4l	DNA-damage-inducible transcript 4-like	680.631	1691.9	1.3142	3.68089e-15
ENSMUSG00000046982	GSMG0019216	Tshz1	teashirt zinc finger family member 1	23.4982	71.5182	1.59942	0.0126249
ENSMUSG00000047250	GSMG0020968	Ptgs1	prostaglandin-endoperoxide synthase 1	97.8534	200.421	1.03394	0.000118081
ENSMUSG00000047363	GSMG0020893	Cstad	CSA-conditional, T cell activation-dependent protein	27.0602	74.4965	1.46702	0.000446101
ENSMUSG00000047394	GSMG0014377	Odf3b	outer dense fiber of sperm tails 3B	75.3014	153.069	1.02756	0.000439785
ENSMUSG00000047409	GSMG0040214	Ctdspl	CTD (carboxy-terminal domain, RNA polymerase II, polypeptide A) small phosphatase-like	254.989	609.231	1.25531	2.3265e-07
ENSMUSG00000047420	GSMG0032868	Fam180a	family with sequence similarity 180, member A	340.408	721.635	1.0865	2.0563e-07
ENSMUSG00000047976	GSMG0033698	Kcna1	potassium voltage-gated channel, shaker-related subfamily, member 1	312.512	1851.77	2.56617	5.01222e-37
ENSMUSG00000048120	GSMG0019672	Entpd1	ectonucleoside triphosphate diphosphohydrolase 1	640.299	1947.83	1.6057	1.32824e-19
ENSMUSG00000048142	GSMG0029054	Nat8l	N-acetyltransferase 8-like	398.951	864.253	1.11441	7.09704e-05
ENSMUSG00000048163	GSMG0030942	Selplg	selectin, platelet (p-selectin) ligand	147.778	612.573	2.05446	1.81932e-19
ENSMUSG00000048489	GSMG0032378	8430408G22Rik	RIKEN cDNA 8430408G22 gene	528.314	4788.01	3.17996	5.03391e-11
ENSMUSG00000048572	GSMG0019546	Tmem252	transmembrane protein 252	1353.36	2953.87	1.12649	2.03945e-06
ENSMUSG00000048612	GSMG0020347	Myof	myoferlin	81.689	209.139	1.36041	1.38932e-07
ENSMUSG00000048782	GSMG0035062	Insc	inscuteable homolog (Drosophila)	20.5701	101.481	2.31226	2.35529e-09
ENSMUSG00000048978	GSMG0010454	Nrsn1	neurensin 1	899.973	2153.8	1.25969	6.33755e-15
ENSMUSG00000049001	GSMG0032007	Ndnf	neuron-derived neurotrophic factor	762.57	2465.19	1.69268	5.23755e-30
ENSMUSG00000049612	GSMG0007067	Omg	oligodendrocyte myelin glycoprotein	417.335	990.838	1.24781	1.63922e-12
ENSMUSG00000049649	GSMG0028463	Gpr3	G-protein coupled receptor 3	44.9204	186.71	2.04757	2.47061e-12
ENSMUSG00000049721	GSMG0004827	Gal3st1	galactose-3-O-sulfotransferase 1	90.4118	289.648	1.67671	5.50887e-10
ENSMUSG00000049892	GSMG0006745	Rasd1	RAS, dexamethasone-induced 1	72.3306	409.256	2.50252	1.80762e-16
ENSMUSG00000050751	GSMG0039057	Pgbd5	piggyBac transposable element derived 5	624.946	1270.33	1.02267	1.39965e-06
ENSMUSG00000050914	GSMG0038366	Ankrd37	ankyrin repeat domain 37	282.966	963.313	1.76795	3.54072e-16
ENSMUSG00000050931	GSMG0026072	Sgms2	sphingomyelin synthase 2	220.771	445.868	1.01225	8.17919e-08
ENSMUSG00000052160	GSMG0008594	Pld4	phospholipase D family, member 4	133.347	276.596	1.05707	3.78559e-05
ENSMUSG00000052336	GSMG0041447	Cx3cr1	chemokine (C-X3-C motif) receptor 1	292.409	640.038	1.13339	3.09943e-06
ENSMUSG00000052911	GSMG0040089	Lamb2	laminin, beta 2	9027.94	19759.9	1.13008	6.72604e-09
ENSMUSG00000053166	GSMG0023885	Cdh22	cadherin 22	98.1705	238.917	1.28356	3.97894e-06
ENSMUSG00000053279	GSMG0065067	E030003E18Rik // Aldh1a1	RIKEN cDNA E030003E18 gene // aldehyde dehydrogenase family 1, subfamily A1	178.534	861.576	2.27383	1.72957e-28
ENSMUSG00000053310	GSMG0040582	Nrgn	neurogranin	1443.61	3063.93	1.08491	1.93753e-05
ENSMUSG00000053702	GSMG0022446	Nebl	nebulette	1556.32	3611.55	1.2148	2.93873e-17
ENSMUSG00000053835	GSMG0017486	H2-T24	histocompatibility 2, T region locus 24	53.8526	197.576	1.8785	1.98765e-11
ENSMUSG00000054619	GSMG0013642	Mettl7a1	methyltransferase like 7A1	103.643	290.506	1.4891	3.31742e-11
ENSMUSG00000054675	GSMG0030941	Tmem119	transmembrane protein 119	271.948	746.446	1.45805	1.63325e-11
ENSMUSG00000055430	GSMG0033088	Nap1l5	nucleosome assembly protein 1-like 5	955.09	2036.95	1.0917	4.54971e-07
ENSMUSG00000055567	GSMG0000381	Unc80	unc-80, NALCN activator	58.6255	135.157	1.21152	0.000705988
ENSMUSG00000055805	GSMG0005978	Fmnl1	formin-like 1	455.721	1061.86	1.2207	2.39337e-10
ENSMUSG00000055866	GSMG0001895	Per2	period circadian clock 2	380.552	856.499	1.17271	2.84798e-08
ENSMUSG00000056158	GSMG0005764	Car10	carbonic anhydrase 10	24.829	87.1495	1.81109	2.07454e-06
ENSMUSG00000056220	GSMG0002206	Pla2g4a	phospholipase A2, group IVA (cytosolic, calcium-dependent)	111.407	346.771	1.63812	2.79338e-11
ENSMUSG00000056596	GSMG0028468	Trnp1	TMF1-regulated nuclear protein 1	226.141	559.276	1.30481	3.40862e-09
ENSMUSG00000056938	GSMG0005975	Acbd4	acyl-Coenzyme A binding domain containing 4	363.361	729.473	1.00522	1.18748e-08
ENSMUSG00000057123	GSMG0024700	Gja5	gap junction protein, alpha 5	226.373	729.18	1.6895	6.90329e-12
ENSMUSG00000057286	GSMG0007656	St6galnac2	ST6 (alpha-N-acetyl-neuraminyl-2,3-beta-galactosyl-1,3)-N-acetylgalactosaminide alpha-2,6-sialyltransferase 2	338.193	1125.01	1.73393	4.14841e-20
ENSMUSG00000058420	GSMG0036572	Syt17	synaptotagmin XVII	89.7941	217.405	1.27543	3.14293e-07
ENSMUSG00000058498	GSMG0028712	Rnf207	ring finger protein 207	40.0156	141.264	1.81495	2.23286e-05
ENSMUSG00000059498	GSMG0002440	Fcgr3	Fc receptor, IgG, low affinity III	57.2752	170.067	1.57458	1.23685e-08
ENSMUSG00000059588	GSMG0023050	Calcrl	calcitonin receptor-like	278.15	698.436	1.32792	6.41348e-09
ENSMUSG00000059824	GSMG0034482	Dbp	D site albumin promoter binding protein	206.183	555.914	1.42837	5.09407e-14
ENSMUSG00000059991	GSMG0030037	Nptx2	neuronal pentraxin 2	46.4089	113.19	1.28645	0.007185
ENSMUSG00000060314	GSMG0036844	Zfp941	zinc finger protein 941	240.337	509.068	1.08115	1.12924e-07
ENSMUSG00000060429	GSMG0013986	Sntb1	syntrophin, basic 1	125.006	267.75	1.10107	2.55071e-05
ENSMUSG00000060586	GSMG0016521	H2-Eb1	histocompatibility 2, class II antigen E beta	27.6194	68.2808	1.31811	0.00325512
ENSMUSG00000060594	GSMG0040749	Layn	layilin	121.078	291.52	1.26821	1.17601e-08
ENSMUSG00000061171	GSMG0022904	Slc38a11	solute carrier family 38, member 11	139.014	408.693	1.55684	6.83307e-14
ENSMUSG00000061353	GSMG0032380	Cxcl12	chemokine (C-X-C motif) ligand 12	2224.59	8863.02	1.99423	5.88163e-53
ENSMUSG00000061751	GSMG0050905	Kalrn	kalirin, RhoGEF kinase	927.194	3023.2	1.70536	1.53421e-16
ENSMUSG00000062329	GSMG0029097	Cytl1	cytokine-like 1	8.68836	92.4958	3.41461	2.55297e-12
ENSMUSG00000062646,ENSMUSG00000079110	GSMG0021645	Ganc // Capn3	glucosidase, alpha%3B neutral C // calpain 3	41.3272	97.9877	1.24558	0.00038053
ENSMUSG00000064080	GSMG0032222	Fbln2	fibulin 2	2188.7	7092.96	1.69657	1.5937e-16
ENSMUSG00000064105	GSMG0019776	Cnnm2	cyclin M2	94.3456	194.358	1.04567	6.24744e-05
ENSMUSG00000064767	GSMG0052303	Snord35b	small nucleolar RNA, C/D box 35B	17.5647	80.9864	2.20372	4.0136e-08
ENSMUSG00000065512	GSMG0053367	Mir138-2	microRNA 138-2	269.929	613.068	1.18387	1.98765e-11
ENSMUSG00000066189	GSMG0035135	Cacng3	calcium channel, voltage-dependent, gamma subunit 3	238.915	897.161	1.91018	2.68263e-24
ENSMUSG00000068196	GSMG0015844	Col8a1	collagen, type VIII, alpha 1	315.578	1034.7	1.71442	1.14161e-15
ENSMUSG00000068299	GSMG0033294	Nat8f4	N-acetyltransferase 8 (GCN5-related) family member 4	44.3519	129.954	1.55016	5.93266e-06
ENSMUSG00000069763	GSMG0005757	Tmem100	transmembrane protein 100	307.492	875.258	1.51106	1.7323e-11
ENSMUSG00000070304	GSMG0039454	Scn2b	sodium channel, voltage-gated, type II, beta	162.903	464.82	1.50944	2.2058e-09
ENSMUSG00000070570	GSMG0034459	Slc17a7	solute carrier family 17 (sodium-dependent inorganic phosphate cotransporter), member 7	2639.02	7821.7	1.56743	2.49692e-17
ENSMUSG00000070637	GSMG0028587	Gm694	predicted gene 694	54.2422	371.565	2.7775	5.22067e-34
ENSMUSG00000070720	GSMG0051922	Tmem200b	transmembrane protein 200B	138.399	849.274	2.61398	1.17688e-29
ENSMUSG00000071341	GSMG0033287	Egr4	early growth response 4	53.8059	369.824	2.77558	1.38124e-18
ENSMUSG00000071637	GSMG0014713	Cebpd	CCAAT/enhancer binding protein (C/EBP), delta	807.969	2176.71	1.43044	1.93964e-13
ENSMUSG00000072941	GSMG0029161	Sod3	superoxide dismutase 3, extracellular	2541.36	5285.57	1.05647	1.11002e-13
ENSMUSG00000073418	GSMG0017434	C4b	complement component 4B (Chido blood group)	301.791	678.513	1.17098	9.25309e-06
ENSMUSG00000073424	GSMG0016503	Cyp4f15	cytochrome P450, family 4, subfamily f, polypeptide 15	61.1102	182.307	1.58182	2.53589e-07
ENSMUSG00000074272	GSMG0035647	Ceacam1	carcinoembryonic antigen-related cell adhesion molecule 1	253.753	598.543	1.24007	1.60329e-11
ENSMUSG00000074896	GSMG0019620	Ifit3	interferon-induced protein with tetratricopeptide repeats 3	80.8011	188.8	1.23105	2.48238e-05
ENSMUSG00000074968	GSMG0023306	Ano3	anoctamin 3	144.56	367.04	1.34471	5.3869e-12
ENSMUSG00000075010	GSMG0020109	AW112010	expressed sequence AW112010	50.8742	130.961	1.36746	7.29099e-05
ENSMUSG00000075289	GSMG0065068	Carns1	carnosine synthase 1	137.547	402.315	1.54891	5.56854e-11
ENSMUSG00000076439	GSMG0017514	Mog	myelin oligodendrocyte glycoprotein	14.3294	411.697	4.84266	1.15587e-57
ENSMUSG00000078958	GSMG0051386	Atp6ap1l	ATPase, H+ transporting, lysosomal accessory protein 1-like	27.7657	119.869	2.11598	6.72253e-09
ENSMUSG00000079018	GSMG0014131	Ly6c1	lymphocyte antigen 6 complex, locus C1	4165.63	15098.3	1.85781	3.94732e-40
ENSMUSG00000079419	GSMG0019428	Ms4a6c	membrane-spanning 4-domains, subfamily A, member 6C	22.1504	65.4722	1.57198	0.000436057
ENSMUSG00000079657	GSMG0043786	Rab26	RAB26, member RAS oncogene family	326.051	910.915	1.48311	2.18372e-12
ENSMUSG00000085440	GSMG0038364	Sorbs2os	sorbin and SH3 domain containing 2, opposite strand	113.159	243.831	1.11327	3.13351e-05
ENSMUSG00000085830	GSMG0020791	Grin1os	glutamate receptor, ionotropic, NMDA1 (zeta 1), opposite strand	230.951	494.563	1.09981	2.90447e-05
ENSMUSG00000086370	GSMG0042755	Ftx	Ftx transcript, Xist regulator (non-protein coding)	265.535	586.694	1.14123	3.86024e-09
ENSMUSG00000087185	GSMG0023238	Gm13872	predicted gene 13872	55.9184	159.444	1.51394	2.09077e-06
ENSMUSG00000087301	GSMG0021148	Gm13629	predicted gene 13629	5.87552	72.4225	3.64733	2.10041e-10
ENSMUSG00000087380	GSMG0031635	2210408F21Rik	RIKEN cDNA 2210408F21 gene	26.5814	137.317	2.36909	1.27368e-13
ENSMUSG00000087620	GSMG0042779	5330434G04Rik	RIKEN cDNA 5330434G04 gene	733.068	1841.37	1.32992	1.5258e-09
ENSMUSG00000089762	GSMG0022616	Ier5l	immediate early response 5-like	283.917	778.955	1.45353	1.01926e-06
ENSMUSG00000090698	GSMG0052074	Apold1	apolipoprotein L domain containing 1	2513.49	7362.42	1.5508	1.56109e-14
ENSMUSG00000091475	GSMG0016378	2810468N07Rik	RIKEN cDNA 2810468N07 gene	134.827	339.001	1.33037	8.72769e-10
ENSMUSG00000094786	GSMG0022272	Gm14403	predicted gene 14403	371.169	1127.27	1.60308	7.46398e-21
ENSMUSG00000096054	GSMG0065008	Syne1	spectrin repeat containing, nuclear envelope 1	221.719	517.157	1.22278	2.32436e-09
ENSMUSG00000096995	GSMG0009335	2810029C07Rik	RIKEN cDNA 2810029C07 gene	123.192	255.945	1.05694	3.76849e-06
ENSMUSG00000097637	GSMG0037959	4933417D19Rik	RIKEN cDNA 4933417D19 gene	38.203	111.348	1.53654	1.9282e-05
ENSMUSG00000097736	GSMG0040264	9530059O14Rik	RIKEN cDNA 9530059O14 gene	1362.3	3091.98	1.18279	1.05373e-12
ENSMUSG00000097745	GSMG0025105	AI115009	expressed sequence AI115009	108.347	259.074	1.25594	1.80237e-06
ENSMUSG00000105010	GSMG0060272	Mir219b	microRNA 219b	40.3825	401.549	3.31205	1.98258e-27
ENSMUSG00000108218	GSMG0006645	Olfr1372-ps1	olfactory receptor 1372, pseudogene 1	227.171	629.503	1.46899	6.71085e-12

## Sheet: Decreased
Ensembl reference name	id	Gene symbol	Description	baseMean P5	baseMean P15	log2FoldChange (P15 v. P5)	padj
ENSMUSG00000000028	GSMG0015524	Cdc45	cell division cycle 45	414.491	188.303	-1.13166	4.6843e-06
ENSMUSG00000000094	GSMG0005701	Tbx4	T-box 4	320.686	118.272	-1.42702	2.42654e-08
ENSMUSG00000000632	GSMG0005572	Sez6	seizure related gene 6	5358.7	2630.23	-1.02667	1.27448e-07
ENSMUSG00000000682	GSMG0028481	Cd52	CD52 antigen	54.9213	26.6353	-1.03252	0.0352148
ENSMUSG00000000861	GSMG0004963	Bcl11a	B cell CLL/lymphoma 11A (zinc finger protein)	502.464	209.676	-1.26636	1.52421e-09
ENSMUSG00000000958	GSMG0012393	Slc7a7	solute carrier family 7 (cationic amino acid transporter, y+ system), member 7	557.643	209.455	-1.40709	1.7323e-11
ENSMUSG00000001228	GSMG0016817	Uhrf1	ubiquitin-like, containing PHD and RING finger domains, 1	855.438	364.576	-1.22754	2.36576e-08
ENSMUSG00000001403	GSMG0022154	Ube2c	ubiquitin-conjugating enzyme E2C	930.656	397.485	-1.22683	1.22867e-11
ENSMUSG00000001517	GSMG0043487	Foxm1	forkhead box M1	213.242	96.4717	-1.15208	9.88675e-05
ENSMUSG00000001525	GSMG0017474	Tubb5	tubulin, beta 5 class I	11481.6	4823.9	-1.25089	5.40085e-16
ENSMUSG00000002297	GSMG0030164	Dbf4	DBF4 zinc finger	307.86	142.796	-1.108	3.29977e-06
ENSMUSG00000002341	GSMG0038542	Ncan	neurocan	11117.3	4370.89	-1.34693	1.41346e-18
ENSMUSG00000002771	GSMG0035925	Grin2d	glutamate receptor, ionotropic, NMDA2D (epsilon 4)	466.839	233.611	-1.00142	0.00286142
ENSMUSG00000002835	GSMG0016809	Chaf1a	chromatin assembly factor 1, subunit A (p150)	685.236	283.11	-1.27428	2.78317e-11
ENSMUSG00000002870	GSMG0033349	Mcm2	minichromosome maintenance complex component 2	2024.72	839.176	-1.26839	3.2488e-11
ENSMUSG00000003352	GSMG0013591	Cacnb3	calcium channel, voltage-dependent, beta 3 subunit	2011.78	946.387	-1.08805	3.5271e-07
ENSMUSG00000003410	GSMG0040462	Elavl3	ELAV (embryonic lethal, abnormal vision, Drosophila)-like 3 (Hu antigen C)	222.448	104.407	-1.09704	0.000146781
ENSMUSG00000003411	GSMG0026895	Rab3b	RAB3B, member RAS oncogene family	697.02	338.706	-1.04279	2.26625e-08
ENSMUSG00000003779	GSMG0018212	Kif20a	kinesin family member 20A	1258.07	603.962	-1.05744	2.35469e-07
ENSMUSG00000003824	GSMG0037546	Syce2	synaptonemal complex central element protein 2	180.379	65.1195	-1.46892	8.3783e-08
ENSMUSG00000003934	GSMG0006868	Efnb3	ephrin B3	1555.88	687.525	-1.17993	1.86783e-08
ENSMUSG00000005233	GSMG0022932	Spc25	SPC25, NDC80 kinetochore complex component, homolog (S. cerevisiae)	662.693	303.512	-1.12726	3.96287e-06
ENSMUSG00000005410	GSMG0037466	Mcm5	minichromosome maintenance complex component 5	1548.63	605.159	-1.35437	8.54146e-16
ENSMUSG00000005447	GSMG0035642	Pafah1b3	platelet-activating factor acetylhydrolase, isoform 1b, subunit 3	739.279	175.45	-2.07583	9.22098e-32
ENSMUSG00000005470	GSMG0037526	Asf1b	anti-silencing function 1B histone chaperone	397.037	164.288	-1.27133	7.95203e-07
ENSMUSG00000005667	GSMG0033242	Mthfd2	methylenetetrahydrofolate dehydrogenase (NAD+ dependent), methenyltetrahydrofolate cyclohydrolase	225.501	111.859	-1.00519	0.000269898
ENSMUSG00000005672	GSMG0029296	Kit	kit oncogene	2818.84	1333.94	-1.07887	2.30729e-14
ENSMUSG00000006218	GSMG0027319	Fam131c	family with sequence similarity 131, member C	102.268	12.152	-3.03268	3.32964e-13
ENSMUSG00000006517	GSMG0039016	Mvd	mevalonate (diphospho) decarboxylase	613.589	286.225	-1.09733	5.31903e-09
ENSMUSG00000006574	GSMG0007445	Slc4a1	solute carrier family 4 (anion exchanger), member 1	343.912	155.059	-1.15694	3.29977e-06
ENSMUSG00000006585	GSMG0037940	Cdt1	chromatin licensing and DNA replication factor 1	195.628	78.7539	-1.31852	5.49569e-07
ENSMUSG00000006586	GSMG0026296	Runx1t1	runt-related transcription factor 1%3B translocated to, 1 (cyclin D-related)	641.295	294.596	-1.11691	1.313e-07
ENSMUSG00000006720	GSMG0009509	Zfp184	zinc finger protein 184 (Kruppel-like)	72.6277	32.4962	-1.14025	0.0113658
ENSMUSG00000007888	GSMG0037385	Crlf1	cytokine receptor-like factor 1	525.402	187.667	-1.48826	1.13413e-12
ENSMUSG00000009376	GSMG0031521	Met	met proto-oncogene	796.921	273.097	-1.53936	8.72915e-15
ENSMUSG00000012443	GSMG0019640	Kif11	kinesin family member 11	838.702	318.307	-1.39383	1.63095e-08
ENSMUSG00000014776	GSMG0037714	Nol3	nucleolar protein 3 (apoptosis repressor with CARD domain)	334.215	150.083	-1.15198	4.52411e-07
ENSMUSG00000014837	GSMG0038835	4931428F04Rik	RIKEN cDNA 4931428F04 gene	582.993	166.827	-1.80406	8.39921e-25
ENSMUSG00000015568	GSMG0037352	Lpl	lipoprotein lipase	1320.74	572.908	-1.2038	6.64709e-14
ENSMUSG00000015843	GSMG0001021	Rxrg	retinoid X receptor gamma	96.0541	45.1821	-1.08157	0.00792884
ENSMUSG00000017386	GSMG0007036	Traf4	TNF receptor associated factor 4	561.921	279.328	-1.0096	1.89339e-07
ENSMUSG00000017499	GSMG0005895	Cdc6	cell division cycle 6	303.855	98.862	-1.61476	2.58362e-10
ENSMUSG00000017550	GSMG0005617	Atad5	ATPase family, AAA domain containing 5	560.455	276.443	-1.0237	5.92306e-08
ENSMUSG00000017716	GSMG0006164	Birc5	baculoviral IAP repeat-containing 5	1148.3	423.316	-1.43895	7.6691e-13
ENSMUSG00000017737	GSMG0022164	Mmp9	matrix metallopeptidase 9	1046.64	45.1442	-4.54405	1.25438e-88
ENSMUSG00000017861	GSMG0022113	Mybl2	myeloblastosis oncogene-like 2	388.094	126.177	-1.61305	1.18771e-14
ENSMUSG00000018012	GSMG0006228	Rac3	RAS-related C3 botulinum substrate 3	2484.91	503.275	-2.30155	2.7947e-53
ENSMUSG00000018411	GSMG0005995	Mapt	microtubule-associated protein tau	4482.07	1071.88	-2.06532	8.30655e-45
ENSMUSG00000018589	GSMG0043012	Glra2	glycine receptor, alpha 2 subunit	146.686	37.0262	-2.00438	1.65948e-10
ENSMUSG00000018983	GSMG0027237	E2f2	E2F transcription factor 2	113.235	54.4208	-1.07526	0.00282514
ENSMUSG00000019303	GSMG0007410	Psmc3ip	proteasome (prosome, macropain) 26S subunit, ATPase 3, interacting protein	196.716	67.6677	-1.52493	1.28547e-07
ENSMUSG00000019874	GSMG0003014	Fabp7	fatty acid binding protein 7, brain	8214.77	740.245	-3.47187	3.35512e-130
ENSMUSG00000019890	GSMG0004523	Nts	neurotensin	389.285	113.258	-1.77961	1.68384e-13
ENSMUSG00000019891	GSMG0002982	Dcbld1	discoidin, CUB and LCCL domain containing 1	1228.88	492.591	-1.31924	4.29191e-20
ENSMUSG00000019894	GSMG0003493	Slc6a15	solute carrier family 6 (neurotransmitter transporter), member 15	613.958	161.998	-1.9198	2.04194e-17
ENSMUSG00000019942	GSMG0004222	Cdk1	cyclin-dependent kinase 1	1805.21	768.498	-1.23112	5.32442e-12
ENSMUSG00000019989	GSMG0003906	Enpp3	ectonucleotide pyrophosphatase/phosphodiesterase 3	241.562	100.875	-1.25585	2.16686e-05
ENSMUSG00000019992	GSMG0002767	Mtfr2	mitochondrial fission regulator 2	110.168	49.7658	-1.15893	0.00336267
ENSMUSG00000020086	GSMG0004151	H2afy2	H2A histone family, member Y2	740.861	314.928	-1.2351	2.3844e-13
ENSMUSG00000020135	GSMG0003259	Apc2	adenomatosis polyposis coli 2	4393.61	2024.43	-1.11787	5.40542e-07
ENSMUSG00000020142	GSMG0006386	Slc1a4	solute carrier family 1 (glutamate/neutral amino acid transporter), member 4	5498.99	1081.83	-2.34409	2.3039e-44
ENSMUSG00000020256	GSMG0004395	Aldh1l2	aldehyde dehydrogenase 1 family, member L2	564.822	114.676	-2.29733	9.18439e-23
ENSMUSG00000020297	GSMG0005004	Nsg2	neuron specific gene family member 2	5701.06	2411.92	-1.24171	5.40085e-16
ENSMUSG00000020330	GSMG0006547	Hmmr	hyaluronan mediated motility receptor (RHAMM)	159.478	68.2171	-1.23013	5.62474e-05
ENSMUSG00000020415	GSMG0006559	Pttg1	pituitary tumor-transforming gene 1	742.079	286.124	-1.37299	1.29871e-13
ENSMUSG00000020534	GSMG0006759	Shmt1	serine hydroxymethyltransferase 1 (soluble)	170.936	83.6336	-1.02216	0.000404709
ENSMUSG00000020547	GSMG0008808	Bzw2	basic leucine zipper and W2 domains 2	2531.29	1043.35	-1.27806	4.72545e-18
ENSMUSG00000020573	GSMG0008789	Pik3cg	phosphoinositide-3-kinase, catalytic, gamma polypeptide	662.169	294.413	-1.16637	2.49326e-09
ENSMUSG00000020635	GSMG0008667	Fkbp1b	FK506 binding protein 1b	510.581	199.361	-1.3534	1.25689e-12
ENSMUSG00000020641	GSMG0008754	Rsad2	radical S-adenosyl methionine domain containing 2	224.798	110.019	-1.03588	6.27458e-05
ENSMUSG00000020649	GSMG0007894	Rrm2	ribonucleotide reductase M2	1392.01	565.302	-1.29902	1.87305e-10
ENSMUSG00000020723	GSMG0007548	Cacng4	calcium channel, voltage-dependent, gamma subunit 4	492.283	191.453	-1.36358	0.0352671
ENSMUSG00000020737	GSMG0007627	Hn1	hematological and neurological expressed sequence 1	6773.31	2402.12	-1.49504	2.83396e-25
ENSMUSG00000020808	GSMG0005465	Fam64a	family with sequence similarity 64, member A	509.794	207.173	-1.29399	2.8118e-07
ENSMUSG00000020834	GSMG0005576	Dhrs13	dehydrogenase/reductase (SDR family) member 13	214.76	84.3039	-1.35161	2.55054e-07
ENSMUSG00000020897	GSMG0005390	Aurkb	aurora kinase B	723.351	271.422	-1.41145	1.63504e-13
ENSMUSG00000020900	GSMG0005379	Myh10	myosin, heavy polypeptide 10, non-muscle	17715.9	8073.62	-1.13396	1.31424e-11
ENSMUSG00000020914	GSMG0007337	Top2a	topoisomerase (DNA) II alpha	804.047	312.538	-1.36288	8.14874e-10
ENSMUSG00000021087	GSMG0008980	Rtn1	reticulon 1	9731.08	4295.91	-1.1795	4.72884e-14
ENSMUSG00000021196	GSMG0010285	Pfkp	phosphofructokinase, platelet	16772.9	4883.04	-1.78012	2.77289e-45
ENSMUSG00000021273	GSMG0012518	Fdft1	farnesyl diphosphate farnesyl transferase 1	1193	482.874	-1.3017	2.09032e-14
ENSMUSG00000021391	GSMG0010645	Cenpp	centromere protein P	136.75	60.0506	-1.1758	0.000854022
ENSMUSG00000021569	GSMG0010871	Trip13	thyroid hormone receptor interactor 13	117.058	38.1327	-1.61172	6.50625e-07
ENSMUSG00000021608	GSMG0009931	Lpcat1	lysophosphatidylcholine acyltransferase 1	2113.98	1048.36	-1.01249	1.24239e-12
ENSMUSG00000021614	GSMG0010923	Vcan	versican	129.998	31.9659	-2.01418	1.77651e-08
ENSMUSG00000021643	GSMG0010120	Serf1	small EDRK-rich factor 1	704.924	196.966	-1.84542	2.50262e-12
ENSMUSG00000021710	GSMG0011079	Nln	neurolysin (metallopeptidase M3 family)	285.626	119.77	-1.25137	3.00108e-08
ENSMUSG00000021714	GSMG0010142	Cenpk	centromere protein K	110.461	42.332	-1.38387	3.75866e-05
ENSMUSG00000021720	GSMG0011092	Rnf180	ring finger protein 180	408.359	201.718	-1.01255	1.04193e-06
ENSMUSG00000021965	GSMG0012472	Ska3	spindle and kinetochore associated complex subunit 3	216.6	63.9104	-1.75517	1.55259e-09
ENSMUSG00000021998	GSMG0011805	Lcp1	lymphocyte cytosolic protein 1	3084.14	1532.83	-1.00818	1.95839e-10
ENSMUSG00000022033	GSMG0011725	Pbk	PDZ binding kinase	377.037	163.158	-1.20378	1.94897e-06
ENSMUSG00000022034	GSMG0012554	Esco2	establishment of sister chromatid cohesion N-acetyltransferase 2	233.505	94.6282	-1.30693	2.79781e-06
ENSMUSG00000022044	GSMG0011730	Stmn4	stathmin-like 4	1691.3	629.304	-1.42881	6.81868e-14
ENSMUSG00000022076	GSMG0012769	Klhl1	kelch-like 1	244.781	26.5689	-3.19487	2.44389e-28
ENSMUSG00000022180	GSMG0012403	Slc7a8	solute carrier family 7 (cationic amino acid transporter, y+ system), member 8	3456.42	1481.37	-1.22157	2.09696e-17
ENSMUSG00000022322	GSMG0038052	Shcbp1	Shc SH2-domain binding protein 1	473.227	191.403	-1.30504	7.64464e-08
ENSMUSG00000022340	GSMG0013933	Sybu	syntabulin (syntaxin-interacting)	918.641	326.384	-1.49486	3.95986e-21
ENSMUSG00000022351	GSMG0013218	Sqle	squalene epoxidase	4455.92	1568.62	-1.50576	2.1359e-22
ENSMUSG00000022372	GSMG0014069	Sla	src-like adaptor	232.282	37.225	-2.66009	8.38623e-23
ENSMUSG00000022456	GSMG0013436	Sept3	septin 3	3301.64	1630.99	-1.01757	1.00927e-12
ENSMUSG00000022462	GSMG0014445	Slc38a2	solute carrier family 38, member 2	35801.8	11728.9	-1.61003	9.29968e-35
ENSMUSG00000022579	GSMG0013282	Gpihbp1	GPI-anchored HDL-binding protein 1	117.48	25.0822	-2.21439	4.93778e-10
ENSMUSG00000022673	GSMG0015478	Mcm4	minichromosome maintenance complex component 4	1571.96	753.748	-1.05861	5.0024e-07
ENSMUSG00000022768	GSMG0060496	Ccdc116	coiled-coil domain containing 116	65.0129	28.913	-1.1699	0.0103309
ENSMUSG00000022865	GSMG0015224	Cxadr	coxsackie virus and adenovirus receptor	583.183	138.566	-2.06361	3.13857e-22
ENSMUSG00000022881	GSMG0015576	Rfc4	replication factor C (activator 1) 4	516.861	224.702	-1.20186	1.01863e-09
ENSMUSG00000022887	GSMG0015579	Masp1	mannan-binding lectin serine peptidase 1	145.146	55.0437	-1.38877	1.42204e-05
ENSMUSG00000022945	GSMG0015331	Chaf1b	chromatin assembly factor 1, subunit B (p60)	241.934	104.64	-1.20797	2.10053e-06
ENSMUSG00000022949	GSMG0015319	Clic6	chloride intracellular channel 6	462.339	212.495	-1.12461	5.34453e-05
ENSMUSG00000023015	GSMG0014497	Racgap1	Rac GTPase-activating protein 1	1232.31	556.726	-1.14499	7.2359e-13
ENSMUSG00000023232	GSMG0028420	Serinc2	serine incorporator 2	158.757	72.8608	-1.12133	0.000130527
ENSMUSG00000023505	GSMG0032469	Cdca3	cell division cycle associated 3	332.285	147.933	-1.16091	1.63697e-06
ENSMUSG00000023832	GSMG0017124	Acat2	acetyl-Coenzyme A acetyltransferase 2	2944.05	1093.06	-1.42942	1.5858e-22
ENSMUSG00000023919	GSMG0017545	Cenpq	centromere protein Q	205.129	98.1321	-1.06919	0.000210583
ENSMUSG00000024014	GSMG0016458	Pim1	proviral integration site 1	122.065	58.6876	-1.05801	0.00112312
ENSMUSG00000024043	GSMG0017808	Arhgap28	Rho GTPase activating protein 28	633.576	288.257	-1.13842	2.2058e-09
ENSMUSG00000024165	GSMG0017239	Hn1l	hematological and neurological expressed 1-like	1411.6	674.229	-1.06533	5.60306e-13
ENSMUSG00000024172	GSMG0016801	St6gal2	beta galactoside alpha 2,6 sialyltransferase 2	772.934	325.801	-1.24676	3.72119e-10
ENSMUSG00000024261	GSMG0018799	Syt4	synaptotagmin IV	1542.66	535.67	-1.52468	1.73291e-26
ENSMUSG00000024270	GSMG0018782	Slc39a6	solute carrier family 39 (metal ion transporter), member 6	1664.95	780.503	-1.09178	1.35893e-13
ENSMUSG00000024426	GSMG0017480	Atat1	alpha tubulin acetyltransferase 1	1270.88	533.803	-1.25013	3.10129e-13
ENSMUSG00000024501	GSMG0018916	Dpysl3	dihydropyrimidinase-like 3	6157.3	586.455	-3.39194	1.32515e-124
ENSMUSG00000024517	GSMG0018514	Grp	gastrin releasing peptide	494.047	218.517	-1.18044	3.327e-08
ENSMUSG00000024524	GSMG0018520	Gnal	guanine nucleotide binding protein, alpha stimulating, olfactory type	309.358	134.17	-1.2062	1.33169e-06
ENSMUSG00000024590	GSMG0018422	Lmnb1	lamin B1	1545.22	647.681	-1.25433	1.17789e-11
ENSMUSG00000024598	GSMG0018997	Fbn2	fibrillin 2	332.177	90.5627	-1.87486	3.21852e-11
ENSMUSG00000024791	GSMG0019327	Cdca5	cell division cycle associated 5	109.971	37.9504	-1.52577	9.1472e-06
ENSMUSG00000024989	GSMG0019647	Cep55	centrosomal protein 55	437.686	148.032	-1.55943	1.38074e-08
ENSMUSG00000025001	GSMG0019661	Hells	helicase, lymphoid specific	569.503	273.855	-1.05566	0.000117609
ENSMUSG00000025153	GSMG0007757	Fasn	fatty acid synthase	687.832	329.988	-1.05572	1.1991e-06
ENSMUSG00000025207	GSMG0019737	Sema4g	sema domain, immunoglobulin domain (Ig), transmembrane domain (TM) and short cytoplasmic domain, (semaphorin) 4G	333.447	126.337	-1.40605	6.40344e-06
ENSMUSG00000025395	GSMG0003673	Prim1	DNA primase, p49 subunit	417.432	169.775	-1.29759	9.50553e-07
ENSMUSG00000025507	GSMG0036855	Pidd1	p53 induced death domain protein 1	212.082	85.7049	-1.29758	1.24174e-06
ENSMUSG00000025529	GSMG0042042	Zfp711	zinc finger protein 711	163.475	77.5698	-1.07365	0.000106706
ENSMUSG00000025574	GSMG0007688	Tk1	thymidine kinase 1	825.364	308.958	-1.41462	6.83307e-14
ENSMUSG00000025747	GSMG0030307	Tyms	thymidylate synthase	660.504	260.318	-1.33962	1.60329e-11
ENSMUSG00000025789	GSMG0036120	St8sia2	ST8 alpha-N-acetyl-neuraminide alpha-2,8-sialyltransferase 2	400.494	25.3225	-3.97829	1.21516e-47
ENSMUSG00000025938	GSMG0001318	Slco5a1	solute carrier organic anion transporter family, member 5A1	119.496	48.0606	-1.30022	6.90398e-05
ENSMUSG00000026058	GSMG0000107	Khdrbs2	KH domain containing, RNA binding, signal transduction associated 2	937.73	383.755	-1.28999	5.40085e-16
ENSMUSG00000026192	GSMG0000398	Atic	5-aminoimidazole-4-carboxamide ribonucleotide formyltransferase/IMP cyclohydrolase	269.546	110.826	-1.29039	5.18526e-08
ENSMUSG00000026274	GSMG0001915	Pask	PAS domain containing serine/threonine kinase	130.251	49.5518	-1.37926	4.78068e-05
ENSMUSG00000026447	GSMG0000777	Pik3c2b	phosphoinositide-3-kinase, class 2, beta polypeptide	605.367	250.189	-1.27152	2.82032e-09
ENSMUSG00000026458	GSMG0002114	Ppfia4	protein tyrosine phosphatase, receptor type, f polypeptide (PTPRF), interacting protein (liprin), alpha 4	183.2	67.2526	-1.44936	1.48995e-07
ENSMUSG00000026516	GSMG0002565	Nvl	nuclear VCP-like	566.203	246.085	-1.20501	1.33429e-10
ENSMUSG00000026558	GSMG0002400	Uck2	uridine-cytidine kinase 2	382.326	183.837	-1.05637	2.3139e-07
ENSMUSG00000026564	GSMG0002388	Dusp27	dual specificity phosphatase 27 (putative)	195.171	65.4349	-1.56991	3.66081e-09
ENSMUSG00000026605	GSMG0002622	Cenpf	centromere protein F	232.505	98.3355	-1.24226	1.75243e-06
ENSMUSG00000026622	GSMG0001241	Nek2	NIMA (never in mitosis gene a)-related expressed kinase 2	190.389	83.957	-1.1717	0.000158767
ENSMUSG00000026669	GSMG0022346	Mcm10	minichromosome maintenance 10 replication initiation factor	195.182	49.3694	-1.96678	6.87433e-11
ENSMUSG00000026683	GSMG0002421	Nuf2	NUF2, NDC80 kinetochore complex component	569.857	199.359	-1.5139	3.34382e-11
ENSMUSG00000026730	GSMG0020674	Pter	phosphotriesterase related	113.361	55.2052	-1.0232	0.00786602
ENSMUSG00000026779	GSMG0022496	Mastl	microtubule associated serine/threonine kinase-like	158.974	78.2827	-1.0128	0.00177674
ENSMUSG00000027014	GSMG0023032	Cwc22	CWC22 spliceosome-associated protein	6073.72	2919.94	-1.05681	3.89529e-07
ENSMUSG00000027074	GSMG0021314	Slc43a3	solute carrier family 43, member 3	1328.43	617.18	-1.10418	1.52203e-09
ENSMUSG00000027115	GSMG0021531	Kif18a	kinesin family member 18A	148.046	69.1003	-1.08856	0.000520657
ENSMUSG00000027217	GSMG0023200	Tspan18	tetraspanin 18	2561.84	1060.24	-1.27241	3.06287e-19
ENSMUSG00000027306	GSMG0021633	Nusap1	nucleolar and spindle associated protein 1	665.095	289.634	-1.19934	3.38468e-06
ENSMUSG00000027323	GSMG0021621	Rad51	RAD51 recombinase	212.408	81.0573	-1.38255	4.85268e-07
ENSMUSG00000027331	GSMG0021610	Knstrn	kinetochore-localized astrin/SPAG5 binding	253.17	90.6488	-1.4783	1.49676e-07
ENSMUSG00000027338,ENSMUSG00000079037,ENSMUSG00000098754	GSMG0021819	Prn // Prnp // Prnd	prion protein gene complex // prion protein // prion protein dublet	5455.6	2085.49	-1.38797	7.51195e-19
ENSMUSG00000027368	GSMG0021742	Dusp2	dual specificity phosphatase 2	1283.46	616.12	-1.06113	5.19612e-08
ENSMUSG00000027379	GSMG0023501	Bub1	BUB1, mitotic checkpoint serine/threonine kinase	526.112	191.558	-1.45263	8.14264e-08
ENSMUSG00000027454	GSMG0021949	Gins1	GINS complex subunit 1 (Psf1 homolog)	136.601	40.3647	-1.75992	6.58875e-08
ENSMUSG00000027469	GSMG0021986	Tpx2	TPX2, microtubule-associated	1734.35	653.421	-1.40721	1.46352e-12
ENSMUSG00000027478	GSMG0021999	Dnmt3b	DNA methyltransferase 3B	526.317	260.569	-1.01534	3.57465e-07
ENSMUSG00000027496	GSMG0023958	Aurka	aurora kinase A	440.083	190.981	-1.20225	1.17695e-08
ENSMUSG00000027500	GSMG0024075	Stmn2	stathmin-like 2	10045.3	3324.4	-1.59547	1.96655e-35
ENSMUSG00000027533	GSMG0024086	Fabp5	fatty acid binding protein 5, epidermal	4039.09	1637.5	-1.30236	1.46501e-24
ENSMUSG00000027560	GSMG0022227	Dok5	docking protein 5	635.861	199.969	-1.66826	3.65706e-20
ENSMUSG00000027568	GSMG0022298	Ntsr1	neurotensin receptor 1	418.493	77.3669	-2.43492	9.13645e-27
ENSMUSG00000027654	GSMG0022094	Fam83d	family with sequence similarity 83, member D	396.476	185.944	-1.09536	2.83525e-07
ENSMUSG00000027699	GSMG0025248	Ect2	ect2 oncogene	620.072	291.115	-1.08966	2.38295e-06
ENSMUSG00000027750	GSMG0024308	Postn	periostin, osteoblast specific factor	1314.81	612.171	-1.10125	2.76699e-08
ENSMUSG00000027932	GSMG0025665	Slc27a3	solute carrier family 27 (fatty acid transporter), member 3	284.387	121.044	-1.23828	3.47623e-08
ENSMUSG00000027978	GSMG0024887	Prss12	protease, serine 12 neurotrypsin (motopsin)	373.751	147.256	-1.33469	2.03138e-06
ENSMUSG00000028044	GSMG0025655	Cks1b	CDC28 protein kinase 1b	785.568	331.947	-1.24174	9.73947e-11
ENSMUSG00000028047	GSMG0024537	Thbs3	thrombospondin 3	1155.85	541.852	-1.09227	1.13084e-06
ENSMUSG00000028051	GSMG0025644	Hcn3	hyperpolarization-activated, cyclic nucleotide-gated K+ 3	566.352	153.114	-1.89033	8.60363e-26
ENSMUSG00000028068	GSMG0024508	Iqgap3	IQ motif containing GTPase activating protein 3	1159.93	443.958	-1.3837	1.37289e-13
ENSMUSG00000028212	GSMG0026280	Ccne2	cyclin E2	241.284	109.808	-1.13576	0.000458098
ENSMUSG00000028312	GSMG0026557	Smc2	structural maintenance of chromosomes 2	460.478	219.716	-1.06561	9.51077e-06
ENSMUSG00000028337	GSMG0027775	Coro2a	coronin, actin binding protein 2A	54.4778	24.204	-1.17029	0.0116579
ENSMUSG00000028364	GSMG0027906	Tnc	tenascin C	734.074	127.275	-2.52627	6.58312e-31
ENSMUSG00000028480	GSMG0026485	Glipr2	GLI pathogenesis-related 2	1081.52	539.099	-1.00414	4.32076e-10
ENSMUSG00000028519	GSMG0026831	Dab1	disabled 1	463.944	220.537	-1.07146	3.65501e-08
ENSMUSG00000028656	GSMG0028312	Cap1	CAP, adenylate cyclase-associated protein 1 (yeast)	3593.03	1595.38	-1.17213	3.11587e-15
ENSMUSG00000028678	GSMG0028250	Kif2c	kinesin family member 2C	427.467	184.205	-1.21408	1.18748e-08
ENSMUSG00000028702	GSMG0028226	Rad54l	RAD54 like (S. cerevisiae)	213.948	84.9665	-1.33281	6.37015e-08
ENSMUSG00000028718	GSMG0026931	Stil	Scl/Tal1 interrupting locus	290.867	98.8173	-1.54837	9.42674e-10
ENSMUSG00000028873	GSMG0028343	Cdca8	cell division cycle associated 8	928.801	351.459	-1.40054	1.30647e-13
ENSMUSG00000029121	GSMG0029094	Crmp1	collapsin response mediator protein 1	4690.34	874.766	-2.4219	2.96153e-48
ENSMUSG00000029126	GSMG0030405	Nsg1	neuron specific gene family member 1	2306.21	655.664	-1.81478	2.33519e-34
ENSMUSG00000029168	GSMG0028995	Dpysl5	dihydropyrimidinase-like 5	643.313	86.9042	-2.90082	4.36495e-45
ENSMUSG00000029304	GSMG0029510	Spp1	secreted phosphoprotein 1	482.228	212.74	-1.17422	5.244e-05
ENSMUSG00000029366	GSMG0029381	Dck	deoxycytidine kinase	341.294	164.648	-1.05006	3.63105e-06
ENSMUSG00000029475	GSMG0031058	Kdm2b	lysine (K)-specific demethylase 2B	971.299	479.399	-1.02251	3.49126e-07
ENSMUSG00000029503	GSMG0030903	P2rx2	purinergic receptor P2X, ligand-gated ion channel, 2	226.082	5.41318	-5.39364	4.09611e-34
ENSMUSG00000029510	GSMG0031262	Gpc2	glypican 2 (cerebroglycan)	417.47	75.6148	-2.46271	2.03789e-33
ENSMUSG00000029581	GSMG0030007	Fscn1	fascin actin-bundling protein 1	12426.2	5593.59	-1.15167	0.0164173
ENSMUSG00000029814	GSMG0032985	Igf2bp3	insulin-like growth factor 2 mRNA binding protein 3	224.809	37.4536	-2.5715	3.67726e-20
ENSMUSG00000029821	GSMG0033006	Dfna5	deafness, autosomal dominant 5 (human)	132.157	57.8674	-1.19844	0.000162413
ENSMUSG00000029832	GSMG0031881	Nfe2l3	nuclear factor, erythroid derived 2, like 3	277.836	74.1031	-1.90292	3.51697e-17
ENSMUSG00000030000	GSMG0032149	Add2	adducin 2 (beta)	1094.2	470.485	-1.21621	1.42869e-13
ENSMUSG00000030077	GSMG0032277	Chl1	cell adhesion molecule L1-like	1211.75	229.769	-2.39606	3.61068e-49
ENSMUSG00000030098	GSMG0033378	Grip2	glutamate receptor interacting protein 2	493.827	210.679	-1.23128	4.02107e-08
ENSMUSG00000030223	GSMG0032591	Ptpro	protein tyrosine phosphatase, receptor type, O	520.774	184.567	-1.49372	3.66085e-14
ENSMUSG00000030225	GSMG0032594	Dera	deoxyribose-phosphate aldolase (putative)	575.046	279.29	-1.04071	7.43444e-08
ENSMUSG00000030226	GSMG0033836	Lmo3	LIM domain only 3	1026.68	506.834	-1.02084	1.60812e-06
ENSMUSG00000030319	GSMG0032360	Cand2	cullin-associated and neddylation-dissociated 2 (putative)	92.1732	34.7281	-1.41038	0.000686783
ENSMUSG00000030346	GSMG0033702	Rad51ap1	RAD51 associated protein 1	381.383	183.999	-1.04828	1.82248e-06
ENSMUSG00000030406	GSMG0035572	Gipr	gastric inhibitory polypeptide receptor	241.99	56.2402	-2.10102	4.48731e-14
ENSMUSG00000030500	GSMG0034535	Slc17a6	solute carrier family 17 (sodium-dependent inorganic phosphate cotransporter), member 6	300.024	68.9469	-2.11399	5.49545e-19
ENSMUSG00000030528	GSMG0036171	Blm	Bloom syndrome, RecQ helicase-like	322.055	151.763	-1.08959	1.00438e-06
ENSMUSG00000030584	GSMG0034275	Dpf1	D4, zinc and double PHD fingers family 1	842.961	392.286	-1.10621	9.49385e-11
ENSMUSG00000030677	GSMG0036679	Kif22	kinesin family member 22	1226.34	501.672	-1.28702	5.4476e-09
ENSMUSG00000030905	GSMG0036597	Crym	crystallin, mu	486.907	189.965	-1.3603	7.34994e-06
ENSMUSG00000031004	GSMG0036802	Mki67	antigen identified by monoclonal antibody Ki 67	583.248	255.107	-1.19075	4.67501e-09
ENSMUSG00000031262	GSMG0042093	Cenpi	centromere protein I	254.858	108.203	-1.22762	0.000235866
ENSMUSG00000031284	GSMG0042167	Pak3	p21 protein (Cdc42/Rac)-activated kinase 3	528.799	212.31	-1.32041	8.85135e-13
ENSMUSG00000031285	GSMG0042900	Dcx	doublecortin	786.287	278.742	-1.50005	3.58405e-18
ENSMUSG00000031343	GSMG0042578	Gabra3	gamma-aminobutyric acid (GABA) A receptor, subunit alpha 3	175.708	73.2458	-1.2628	7.18218e-06
ENSMUSG00000031391	GSMG0042600	L1cam	L1 cell adhesion molecule	986.251	318.194	-1.63326	1.2236e-10
ENSMUSG00000031398	GSMG0041859	Plxna3	plexin A3	1650.97	556.458	-1.56903	1.00372e-13
ENSMUSG00000031548	GSMG0037107	Sfrp1	secreted frizzled-related protein 1	1136.8	315.092	-1.85064	1.12767e-24
ENSMUSG00000031561	GSMG0038400	Tenm3	teneurin transmembrane protein 3	154.763	60.6013	-1.35408	0.000109053
ENSMUSG00000031562	GSMG0037268	Dctd	dCMP deaminase	497.142	180.923	-1.45081	3.59179e-12
ENSMUSG00000031628	GSMG0037258	Casp3	caspase 3	428.644	153.578	-1.47865	4.83231e-14
ENSMUSG00000031756	GSMG0037863	Cenpn	centromere protein N	146.857	49.3689	-1.56723	2.72674e-06
ENSMUSG00000031827	GSMG0038984	Cotl1	coactosin-like 1 (Dictyostelium)	1922.68	672.954	-1.51437	0.0104709
ENSMUSG00000031872	GSMG0037686	Bean1	brain expressed, associated with Nedd4, 1	114.662	48.1351	-1.24782	0.00115639
ENSMUSG00000031906	GSMG0038871	Smpd3	sphingomyelin phosphodiesterase 3, neutral	318.867	131.337	-1.28385	1.76449e-05
ENSMUSG00000031934	GSMG0040371	Panx1	pannexin 1	609.388	222.24	-1.44914	9.17963e-15
ENSMUSG00000032024	GSMG0039400	Clmp	CXADR-like membrane protein	537.644	182.912	-1.54755	1.44817e-11
ENSMUSG00000032113	GSMG0040570	Chek1	checkpoint kinase 1	145.211	52.6866	-1.45404	1.4486e-05
ENSMUSG00000032207	GSMG0040977	Lipc	lipase, hepatic	440.969	193.756	-1.18793	1.97137e-09
ENSMUSG00000032218	GSMG0040970	Ccnb2	cyclin B2	586.192	280.234	-1.06483	2.17254e-06
ENSMUSG00000032297	GSMG0039621	Celf6	CUGBP, Elav-like family member 6	457.459	197.621	-1.20641	5.59066e-10
ENSMUSG00000032400	GSMG0040912	Zwilch	zwilch kinetochore protein	198.925	72.7576	-1.44015	1.26225e-05
ENSMUSG00000032484	GSMG0040136	Ngp	neutrophilic granule protein	129.123	23.6946	-2.44302	1.91213e-12
ENSMUSG00000032554	GSMG0041221	Trf	transferrin	9017.2	3850.4	-1.22736	5.68979e-20
ENSMUSG00000032643	GSMG0027044	Fhl3	four and a half LIM domains 3	204.508	36.8401	-2.47562	9.67407e-10
ENSMUSG00000032735	GSMG0019029	Ablim3	actin binding LIM protein family, member 3	479.159	196.916	-1.28576	5.41951e-10
ENSMUSG00000032783	GSMG0013610	Troap	trophinin associated protein	236.053	82.7767	-1.4993	6.18313e-07
ENSMUSG00000032815	GSMG0039041	Fanca	Fanconi anemia, complementation group A	202.379	93.5766	-1.11671	8.67211e-06
ENSMUSG00000032890	GSMG0027021	Rims3	regulating synaptic membrane exocytosis 3	122.921	49.9402	-1.30947	8.12494e-05
ENSMUSG00000033152	GSMG0033348	Podxl2	podocalyxin-like 2	7836.03	3813.29	-1.03906	1.48995e-12
ENSMUSG00000033578	GSMG0042092	Tmem35	transmembrane protein 35	1473.16	571.15	-1.36496	1.84828e-15
ENSMUSG00000033767	GSMG0025568	D930015E06Rik	RIKEN cDNA D930015E06 gene	1290.71	547.722	-1.23649	9.2425e-16
ENSMUSG00000033854	GSMG0009182	Kcnk10	potassium channel, subfamily K, member 10	188.799	51.3273	-1.89535	8.57424e-11
ENSMUSG00000034009	GSMG0025542	Rxfp1	relaxin/insulin-like family peptide receptor 1	594.342	279.116	-1.09227	4.2006e-09
ENSMUSG00000034023	GSMG0032337	Fancd2	Fanconi anemia, complementation group D2	315.4	146.231	-1.10379	1.30572e-05
ENSMUSG00000034098	GSMG0024433	Fstl5	follistatin-like 5	223.037	103.547	-1.09852	2.54492e-05
ENSMUSG00000034226	GSMG0023390	Rhov	ras homolog family member V	157.956	59.7149	-1.40355	4.85178e-07
ENSMUSG00000034311	GSMG0041954	Kif4	kinesin family member 4	548.186	213.674	-1.35719	2.16086e-08
ENSMUSG00000034579	GSMG0004819	Pla2g3	phospholipase A2, group III	274.181	125.137	-1.13461	3.52763e-06
ENSMUSG00000034845	GSMG0038580	Plvap	plasmalemma vesicle associated protein	117.692	19.2376	-2.63757	1.20544e-06
ENSMUSG00000034906	GSMG0023485	Ncaph	non-SMC condensin I complex, subunit H	1926.99	956.4	-1.0094	2.09458e-08
ENSMUSG00000035184	GSMG0011674	Fam124a	family with sequence similarity 124, member A	1522.17	518.145	-1.55248	2.47614e-19
ENSMUSG00000035246	GSMG0041914	Pcyt1b	phosphate cytidylyltransferase 1, choline, beta isoform	557.686	269.968	-1.04512	2.97678e-09
ENSMUSG00000035277	GSMG0041912	Arx	aristaless related homeobox	346.037	163.939	-1.08334	3.22818e-07
ENSMUSG00000035299	GSMG0042301	Mid1	midline 1	839.246	365.02	-1.19874	5.75236e-13
ENSMUSG00000035551	GSMG0027767	Igfbpl1	insulin-like growth factor binding protein-like 1	284.844	40.8694	-2.80997	2.0734e-05
ENSMUSG00000035561	GSMG0026517	Aldh1b1	aldehyde dehydrogenase 1 family, member B1	266.043	53.6225	-2.31063	5.20937e-21
ENSMUSG00000035578	GSMG0015670	Iqcg	IQ motif containing G	89.4286	31.4232	-1.50363	0.000112238
ENSMUSG00000035683	GSMG0026491	Melk	maternal embryonic leucine zipper kinase	436.224	180.388	-1.26847	1.10496e-06
ENSMUSG00000035835	GSMG0004321	Plppr3	phospholipid phosphatase related 3	4920.44	1234.72	-1.99538	1.34002e-33
ENSMUSG00000035914	GSMG0040842	Cd276	CD276 antigen	651.714	269.617	-1.27244	3.9495e-07
ENSMUSG00000035960	GSMG0011523	Apex1	apurinic/apyrimidinic endonuclease 1	978.305	441.133	-1.14872	2.80212e-10
ENSMUSG00000036036	GSMG0016633	Zfp57	zinc finger protein 57	3224.26	637.676	-2.34117	3.44623e-40
ENSMUSG00000036111	GSMG0036493	Lmo1	LIM domain only 1	240.119	88.5075	-1.44522	2.3292e-06
ENSMUSG00000036223	GSMG0019136	Ska1	spindle and kinetochore associated complex subunit 1	146.859	41.8593	-1.83234	6.33178e-09
ENSMUSG00000036246	GSMG0037361	Gmip	Gem-interacting protein	733.722	234.109	-1.64945	5.04673e-17
ENSMUSG00000036766	GSMG0001836	Dner	delta/notch-like EGF repeat containing	1361.53	537.356	-1.33937	9.41403e-10
ENSMUSG00000036768	GSMG0040269	Kif15	kinesin family member 15	415.4	158.681	-1.38364	9.17814e-07
ENSMUSG00000036777	GSMG0040475	Anln	anillin, actin binding protein	754.224	370.324	-1.02497	2.92349e-07
ENSMUSG00000036885	GSMG0024366	Arhgef26	Rho guanine nucleotide exchange factor (GEF) 26	285.796	140.226	-1.02506	0.000229101
ENSMUSG00000036902	GSMG0038712	Neto2	neuropilin (NRP) and tolloid (TLL)-like 2	1074.99	392.038	-1.45582	8.3955e-17
ENSMUSG00000036913	GSMG0037989	Trim67	tripartite motif-containing 67	1085.54	44.4233	-4.63704	2.08058e-94
ENSMUSG00000036928	GSMG0029957	Stag3	stromal antigen 3	1083.23	372.334	-1.54007	8.45251e-22
ENSMUSG00000037337	GSMG0034265	Map4k1	mitogen-activated protein kinase kinase kinase kinase 1	155.931	69.8957	-1.14566	0.000109345
ENSMUSG00000037466	GSMG0008605	4930427A07Rik	RIKEN cDNA 4930427A07 gene	148.503	71.3407	-1.05355	0.00034672
ENSMUSG00000037474	GSMG0002641	Dtl	denticleless E3 ubiquitin protein ligase	374.645	136.73	-1.44645	3.64684e-11
ENSMUSG00000037493	GSMG0040778	Cib2	calcium and integrin binding family member 2	447.147	121.322	-1.88159	7.80397e-22
ENSMUSG00000037544	GSMG0012318	Dlgap5	discs, large (Drosophila) homolog-associated protein 5	362.197	155.694	-1.21702	1.2115e-07
ENSMUSG00000037568	GSMG0002630	Vash2	vasohibin 2	169.016	25.1274	-2.7689	8.85797e-17
ENSMUSG00000037725	GSMG0038180	Ckap2	cytoskeleton associated protein 2	636.177	243.502	-1.38273	8.79005e-09
ENSMUSG00000037984	GSMG0033068	Neurod6	neurogenic differentiation 6	1408.36	397.641	-1.82554	2.01787e-27
ENSMUSG00000037995	GSMG0001069	Igsf9	immunoglobulin superfamily, member 9	969.195	294.219	-1.7194	3.34144e-12
ENSMUSG00000038065	GSMG0031919	Mturn	maturin, neural progenitor differentiation regulator homolog (Xenopus)	468.796	234.365	-1.00241	1.67681e-07
ENSMUSG00000038267	GSMG0010530	Slc22a23	solute carrier family 22, member 23	306.925	150.61	-1.02384	0.000218065
ENSMUSG00000038331	GSMG0001603	Satb2	special AT-rich sequence binding protein 2	591.464	154.027	-1.93175	1.68863e-21
ENSMUSG00000038379	GSMG0039871	Ttk	Ttk protein kinase	428.118	186.579	-1.19409	4.60867e-05
ENSMUSG00000038602	GSMG0002988	Slc35f1	solute carrier family 35, member F1	733.597	277.589	-1.40194	1.32081e-13
ENSMUSG00000038777	GSMG0024647	Sema6c	sema domain, transmembrane domain (TM), and cytoplasmic domain, (semaphorin) 6C	1229.77	603.292	-1.02766	1.93259e-05
ENSMUSG00000038943	GSMG0034691	Prc1	protein regulator of cytokinesis 1	1512.67	663.303	-1.18856	6.38296e-10
ENSMUSG00000038963	GSMG0022297	Slco4a1	solute carrier organic anion transporter family, member 4a1	261.952	103.799	-1.33732	3.23367e-08
ENSMUSG00000039057	GSMG0060652	Myo16	myosin XVI	862.501	341.327	-1.33534	6.91237e-11
ENSMUSG00000039194	GSMG0036151	Rlbp1	retinaldehyde binding protein 1	314.358	75.114	-2.05493	6.93347e-20
ENSMUSG00000039372	GSMG0001736	March4	membrane-associated ring finger (C3HC4) 4	271.665	114.381	-1.24981	4.30695e-08
ENSMUSG00000039396	GSMG0038431	Neil3	nei like 3 (E. coli)	402.374	174.333	-1.20095	1.08648e-06
ENSMUSG00000039470	GSMG0037215	Zdhhc2	zinc finger, DHHC domain containing 2	728.835	336.289	-1.11348	1.84735e-11
ENSMUSG00000039542	GSMG0040726	Ncam1	neural cell adhesion molecule 1	3794.74	1541.03	-1.29955	3.02926e-12
ENSMUSG00000039706	GSMG0030443	Ldb2	LIM domain binding 2	421.935	182.215	-1.20495	8.72273e-09
ENSMUSG00000039748	GSMG0001105	Exo1	exonuclease 1	265.221	101.997	-1.37374	2.14229e-06
ENSMUSG00000039911	GSMG0028681	Spsb1	splA/ryanodine receptor domain and SOCS box containing 1	675.067	317.854	-1.08571	4.51274e-10
ENSMUSG00000039976	GSMG0007710	Tbc1d16	TBC1 domain family, member 16	583.767	262.735	-1.14591	5.07548e-06
ENSMUSG00000040084	GSMG0021605	Bub1b	BUB1B, mitotic checkpoint serine/threonine kinase	960.321	377.585	-1.34249	2.39738e-09
ENSMUSG00000040204	GSMG0051052	2810417H13Rik	RIKEN cDNA 2810417H13 gene	698.925	248.043	-1.49472	3.42084e-07
ENSMUSG00000040339	GSMG0025943	Fam102b	family with sequence similarity 102, member B	409.295	193.91	-1.07809	4.25772e-05
ENSMUSG00000040649	GSMG0033641	Rimklb	ribosomal modification protein rimK-like family member B	394.335	113.496	-1.78706	1.8648e-16
ENSMUSG00000040653	GSMG0003757	Ppp1r14c	protein phosphatase 1, regulatory (inhibitor) subunit 14c	907.747	371.48	-1.29239	5.93801e-12
ENSMUSG00000040990	GSMG0042249	Sh3kbp1	SH3-domain kinase binding protein 1	2267.22	1050.03	-1.10959	4.72884e-14
ENSMUSG00000041219	GSMG0023343	Arhgap11a	Rho GTPase activating protein 11A	706.328	312.943	-1.17157	6.68853e-09
ENSMUSG00000041261	GSMG0027542	Car8	carbonic anhydrase 8	253.36	82.5767	-1.61959	3.13758e-12
ENSMUSG00000041324	GSMG0009465	Inhba	inhibin beta-A	71.1854	24.7836	-1.5357	0.00021698
ENSMUSG00000041361	GSMG0040981	Myzap	myocardial zonula adherens protein	404.968	117.14	-1.78862	1.87876e-17
ENSMUSG00000041362	GSMG0020562	Shtn1	shootin 1	268.856	86.9995	-1.63761	8.47784e-11
ENSMUSG00000041449	GSMG0051317	Serpina3h	serine (or cysteine) peptidase inhibitor, clade A, member 3H	531.302	188.923	-1.48894	3.71264e-08
ENSMUSG00000041453	GSMG0030056	Rpl21	ribosomal protein L21	410.898	141.322	-1.54385	1.4389e-15
ENSMUSG00000041565	GSMG0050946	L3mbtl4	l(3)mbt-like 4 (Drosophila)	470.73	131.576	-1.84438	4.43474e-19
ENSMUSG00000041695	GSMG0006074	Kcnj2	potassium inwardly-rectifying channel, subfamily J, member 2	5642.66	2616.58	-1.10913	2.33371e-14
ENSMUSG00000041708	GSMG0013458	Mpped1	metallophosphoesterase domain containing 1	1139	321.168	-1.82488	7.66868e-26
ENSMUSG00000041774	GSMG0014724	Ydjc	YdjC homolog (bacterial)	198.114	71.8492	-1.47098	4.45167e-08
ENSMUSG00000041859	GSMG0001370	Mcm3	minichromosome maintenance complex component 3	1686.55	673.046	-1.32285	2.36581e-10
ENSMUSG00000041911	GSMG0021206	Dlx1	distal-less homeobox 1	544.097	211.248	-1.37132	3.28475e-09
ENSMUSG00000042035	GSMG0024730	Igsf3	immunoglobulin superfamily, member 3	388.759	156.514	-1.31485	2.14677e-09
ENSMUSG00000042453	GSMG0030224	Reln	reelin	252.068	117.79	-1.09385	8.88899e-06
ENSMUSG00000042659	GSMG0036096	Arrdc4	arrestin domain containing 4	890.613	378.565	-1.2356	4.01835e-14
ENSMUSG00000042684	GSMG0002239	Npl	N-acetylneuraminate pyruvate lyase	273.099	128.706	-1.08489	1.15922e-05
ENSMUSG00000042757	GSMG0043578	Tmem108	transmembrane protein 108	387.919	179.729	-1.10577	7.31375e-08
ENSMUSG00000042873	GSMG0033525	Lhfpl4	lipoma HMGIC fusion partner-like protein 4	231.875	108.939	-1.09037	8.99449e-05
ENSMUSG00000042978	GSMG0035158	Sbk1	SH3-binding kinase 1	3403.55	742.802	-2.19481	2.5913e-28
ENSMUSG00000043004	GSMG0012078	Gng2	guanine nucleotide binding protein (G protein), gamma 2	4129.07	1643.18	-1.33011	4.40963e-20
ENSMUSG00000043388	GSMG0031344	Tmem130	transmembrane protein 130	1058.59	459.478	-1.20212	1.65171e-09
ENSMUSG00000043557	GSMG0017337	Mdga1	MAM domain containing glycosylphosphatidylinositol anchor 1	1017.09	337.641	-1.58973	4.9735e-12
ENSMUSG00000044071	GSMG0003626	Fam19a2	family with sequence similarity 19, member A2	662.19	303.353	-1.12655	3.94248e-11
ENSMUSG00000044201	GSMG0018829	Cdc25c	cell division cycle 25C	226.313	88.8389	-1.35127	3.79425e-07
ENSMUSG00000044361,ENSMUSG00000115388	GSMG0014156	Eppk1 // BC024139	epiplakin 1 // cDNA sequence BC024139	356.883	99.0909	-1.84228	8.151e-14
ENSMUSG00000044364	GSMG0021959	Tmem74b	transmembrane protein 74B	105.883	42.0711	-1.34008	0.000772866
ENSMUSG00000044365	GSMG0024962	Cxxc4	CXXC finger 4	156.613	65.4919	-1.26456	7.78434e-06
ENSMUSG00000044433	GSMG0036949	Camsap3	calmodulin regulated spectrin-associated protein family, member 3	697.53	289.993	-1.26706	2.48017e-09
ENSMUSG00000044499	GSMG0002869	Hs3st5	heparan sulfate (glucosamine) 3-O-sulfotransferase 5	333.992	159.927	-1.0599	4.48703e-07
ENSMUSG00000044835	GSMG0000960	Ankrd45	ankyrin repeat domain 45	100.351	40.0711	-1.31175	0.000187685
ENSMUSG00000045273	GSMG0011040	Cenph	centromere protein H	90.7092	33.3403	-1.44428	0.000208728
ENSMUSG00000045328	GSMG0024965	Cenpe	centromere protein E	441.185	171.811	-1.35417	1.25057e-07
ENSMUSG00000045348	GSMG0031247	Nyap1	neuronal tyrosine-phosphorylated phosphoinositide 3-kinase adaptor 1	350.343	175.094	-1.00269	2.1368e-05
ENSMUSG00000045751	GSMG0026345	Mms22l	MMS22-like, DNA repair protein	368.605	169.756	-1.11455	8.01847e-07
ENSMUSG00000046186	GSMG0039844	Cd109	CD109 antigen	382.625	101.504	-1.91826	1.39815e-16
ENSMUSG00000046318	GSMG0019061	Ccbe1	collagen and calcium binding EGF domains 1	259.009	47.7247	-2.441	3.46602e-17
ENSMUSG00000046449	GSMG0042762	C77370	expressed sequence C77370	845.098	251.189	-1.74841	3.45101e-26
ENSMUSG00000046807	GSMG0004251	Lrrc75b	leucine rich repeat containing 75B	53.2821	17.18	-1.61049	0.00111612
ENSMUSG00000046814	GSMG0021622	Gchfr	GTP cyclohydrolase I feedback regulator	59.5949	24.2992	-1.29893	0.00695084
ENSMUSG00000046997	GSMG0041164	Spsb4	splA/ryanodine receptor domain and SOCS box containing 4	93.1169	37.5982	-1.31425	0.00117788
ENSMUSG00000047139	GSMG0002942	Cd24a	CD24a antigen	3666.08	797.55	-2.20022	3.97635e-57
ENSMUSG00000047181	GSMG0005798	Samd14	sterile alpha motif domain containing 14	1635.43	562.057	-1.54279	6.67091e-15
ENSMUSG00000047261	GSMG0015740	Gap43	growth associated protein 43	4101.8	823.4	-2.31628	1.31695e-55
ENSMUSG00000047534	GSMG0008931	Mis18bp1	MIS18 binding protein 1	110.735	53.9909	-1.02966	0.00997383
ENSMUSG00000047557	GSMG0025488	Lxn	latexin	2998.2	1239.04	-1.27557	1.57283e-15
ENSMUSG00000047945	GSMG0027128	Marcksl1	MARCKS-like 1	7511.85	2352.69	-1.67542	4.12824e-28
ENSMUSG00000048327	GSMG0023520	Ckap2l	cytoskeleton associated protein 2-like	550.194	202.504	-1.4389	2.51116e-12
ENSMUSG00000048617	GSMG0037550	Rtbdn	retbindin	112.97	55.3333	-1.02513	0.00275125
ENSMUSG00000048922	GSMG0012581	Cdca2	cell division cycle associated 2	142.082	35.9541	-1.9734	6.57263e-09
ENSMUSG00000049107	GSMG0033691	Ntf3	neurotrophin 3	130.92	24.8752	-2.38938	1.23197e-11
ENSMUSG00000049122	GSMG0026665	Frmd3	FERM domain containing 3	490.458	213.349	-1.2038	8.61683e-10
ENSMUSG00000049551	GSMG0031196	Fzd9	frizzled class receptor 9	330.504	145.281	-1.18979	1.42384e-08
ENSMUSG00000049690	GSMG0002034	Nckap5	NCK-associated protein 5	1694.46	790.338	-1.09935	5.37493e-09
ENSMUSG00000050132	GSMG0007045	Sarm1	sterile alpha and HEAT/Armadillo motif containing 1	610.471	294.378	-1.0546	1.30572e-05
ENSMUSG00000050640	GSMG0030785	Tmem150c	transmembrane protein 150C	262.352	72.6739	-1.85602	4.9339e-16
ENSMUSG00000051243	GSMG0040837	Islr2	immunoglobulin superfamily containing leucine-rich repeat 2	356	127.596	-1.4885	9.80738e-09
ENSMUSG00000051378	GSMG0007464	Kif18b	kinesin family member 18B	207.127	77.91	-1.40185	6.26072e-07
ENSMUSG00000051855	GSMG0031630	Mest	mesoderm specific transcript	2254.74	825.48	-1.44728	6.8785e-13
ENSMUSG00000052387	GSMG0019518	Trpm3	transient receptor potential cation channel, subfamily M, member 3	889.345	299.7	-1.56669	1.03577e-09
ENSMUSG00000052516	GSMG0015936	Robo2	roundabout guidance receptor 2	642.706	283.082	-1.1796	1.05796e-10
ENSMUSG00000052566	GSMG0037552	Hook2	hook microtubule tethering protein 2	1559.23	769.03	-1.01966	8.06584e-08
ENSMUSG00000052727	GSMG0011019	Map1b	microtubule-associated protein 1B	16072.7	4792.24	-1.7462	1.16806e-28
ENSMUSG00000053192	GSMG0025736	Mllt11	myeloid/lymphoid or mixed-lineage leukemia%3B translocated to, 11	4335.72	2053.06	-1.07916	1.07845e-10
ENSMUSG00000054115	GSMG0013761	Skp2	S-phase kinase-associated protein 2 (p45)	297.73	139.89	-1.0844	8.90956e-06
ENSMUSG00000054446	GSMG0031628	Cpa1	carboxypeptidase A1, pancreatic	233.546	46.8097	-2.30395	4.07568e-18
ENSMUSG00000054520	GSMG0029063	Sh3bp2	SH3-domain binding protein 2	347.885	84.4701	-2.03777	6.70739e-21
ENSMUSG00000054641	GSMG0043525	Mmrn1	multimerin 1	697.522	242.902	-1.517	2.08181e-15
ENSMUSG00000054871	GSMG0041488	Tmem158	transmembrane protein 158	2777.98	1176.32	-1.24125	7.76786e-14
ENSMUSG00000055022	GSMG0013539	Cntn1	contactin 1	2338.66	1152.6	-1.01954	1.28751e-07
ENSMUSG00000055078	GSMG0035996	Gabra5	gamma-aminobutyric acid (GABA) A receptor, subunit alpha 5	737.788	289.391	-1.35323	9.1244e-14
ENSMUSG00000056054	GSMG0024589	S100a8	S100 calcium binding protein A8 (calgranulin A)	56.0505	12.727	-2.18996	6.12175e-05
ENSMUSG00000056071	GSMG0025671	S100a9	S100 calcium binding protein A9 (calgranulin B)	108.197	46.2368	-1.24761	0.00172517
ENSMUSG00000056394	GSMG0034034	Lig1	ligase I, DNA, ATP-dependent	1403.45	695.054	-1.01268	8.61126e-11
ENSMUSG00000056498	GSMG0024464	Tmem154	transmembrane protein 154	1988.32	992.211	-1.00322	5.38973e-10
ENSMUSG00000057182	GSMG0050993	Scn3a	sodium channel, voltage-gated, type III, alpha	1588.5	738.178	-1.10518	1.96028e-12
ENSMUSG00000058290	GSMG0013688	Espl1	extra spindle pole bodies 1, separase	731.98	278.592	-1.39182	2.66521e-15
ENSMUSG00000058773	GSMG0010397	Hist1h1b	histone cluster 1, H1b	83.3594	23.4623	-1.84638	7.84458e-06
ENSMUSG00000059049	GSMG0027998	Frem1	Fras1 related extracellular matrix protein 1	80.3214	21.6611	-1.88793	3.45817e-06
ENSMUSG00000059363	GSMG0020204	Fxn	frataxin	404.216	183.335	-1.13978	1.58235e-07
ENSMUSG00000059602	GSMG0004418	Syn3	synapsin III	399.31	119.828	-1.73414	7.86775e-18
ENSMUSG00000059743	GSMG0025643	Fdps	farnesyl diphosphate synthetase	1379.61	604.354	-1.18986	7.59286e-14
ENSMUSG00000060288	GSMG0028289	Ppih	peptidyl prolyl isomerase H	346.507	168.521	-1.0387	6.70324e-06
ENSMUSG00000060470	GSMG0037657	Adgrg3	adhesion G protein-coupled receptor G3	369.145	165.002	-1.15956	4.69689e-07
ENSMUSG00000060568	GSMG0001013	Fam78b	family with sequence similarity 78, member B	105.288	51.9453	-1.01642	0.00406214
ENSMUSG00000060716	GSMG0008245	Plekhh1	pleckstrin homology domain containing, family H (with MyTH4 domain) member 1	488.506	215.733	-1.17991	2.03987e-07
ENSMUSG00000061808	GSMG0018104	Ttr	transthyretin	14897.6	292.189	-5.672	0.00523432
ENSMUSG00000062184	GSMG0042496	Hs6st2	heparan sulfate 6-O-sulfotransferase 2	160.821	58.9321	-1.45026	2.22435e-06
ENSMUSG00000062309	GSMG0039582	Rpp25	ribonuclease P/MRP 25 subunit	138.184	54.1483	-1.35263	2.24463e-06
ENSMUSG00000062380	GSMG0037966	Tubb3	tubulin, beta 3 class III	7036.62	1239.64	-2.50505	1.09671e-64
ENSMUSG00000062510	GSMG0001228	Nsl1	NSL1, MIS12 kinetochore complex component	432.861	172.61	-1.32244	7.24127e-08
ENSMUSG00000062545	GSMG0028381	Tlr12	toll-like receptor 12	1535	664.561	-1.20859	1.48995e-12
ENSMUSG00000063445	GSMG0015388	Nmral1	NmrA-like family domain containing 1	247.663	114.124	-1.11269	8.75523e-06
ENSMUSG00000063446	GSMG0026552	Plppr1	phospholipid phosphatase related 1	679.793	105.472	-2.69055	2.3438e-45
ENSMUSG00000063632	GSMG0050861	Sox11	SRY (sex determining region Y)-box 11	1634.14	348.181	-2.23637	3.41715e-28
ENSMUSG00000063659	GSMG0001117	Zbtb18	zinc finger and BTB domain containing 18	5871.3	1449.92	-2.01918	4.01726e-37
ENSMUSG00000063704	GSMG0013292	Mapk15	mitogen-activated protein kinase 15	1032.07	218.383	-2.23954	9.18439e-23
ENSMUSG00000063727	GSMG0013975	Tnfrsf11b	tumor necrosis factor receptor superfamily, member 11b (osteoprotegerin)	956.924	341.853	-1.4865	2.17613e-18
ENSMUSG00000064125	GSMG0038045	Prr36	proline rich 36	662.27	266.973	-1.31051	6.59843e-12
ENSMUSG00000066705	GSMG0039458	Fxyd6	FXYD domain-containing ion transport regulator 6	4299.11	1923.02	-1.15987	3.00674e-13
ENSMUSG00000067377	GSMG0042832	Tspan6	tetraspanin 6	3104.29	1509.84	-1.03959	5.10803e-11
ENSMUSG00000067786	GSMG0022070	Nnat	neuronatin	7328.55	3081.12	-1.25054	6.01159e-12
ENSMUSG00000068101	GSMG0014295	Cenpm	centromere protein M	534.314	233.757	-1.19125	1.12566e-09
ENSMUSG00000068748	GSMG0031567	Ptprz1	protein tyrosine phosphatase, receptor type Z, polypeptide 1	2047.95	830.014	-1.30126	4.89735e-17
ENSMUSG00000069793	GSMG0007108	Slfn9	schlafen 9	338.205	108.642	-1.62705	4.52434e-09
ENSMUSG00000069910	GSMG0006511	Spdl1	spindle apparatus coiled-coil protein 1	120.32	46.5285	-1.35235	0.000284455
ENSMUSG00000070858	GSMG0029053	Gm1673	predicted gene 1673	995.878	472.386	-1.08039	2.73253e-05
ENSMUSG00000071234	GSMG0009119	Syndig1l	synapse differentiation inducing 1 like	82.7767	33.6473	-1.28933	0.000698132
ENSMUSG00000071451	GSMG0009629	Psmg4	proteasome (prosome, macropain) assembly chaperone 4	746.051	356.897	-1.06783	3.0885e-08
ENSMUSG00000071547	GSMG0011390	Nt5dc2	5'-nucleotidase domain containing 2	1913.86	763.008	-1.32517	1.05171e-13
ENSMUSG00000071561	GSMG0051488	BC100530	cDNA sequence BC100530	52.6375	12.9215	-2.0774	0.000668094
ENSMUSG00000071855	GSMG0018938	Ccdc112	coiled-coil domain containing 112	431.083	198.911	-1.12072	7.26105e-08
ENSMUSG00000071984	GSMG0050939	Fndc1	fibronectin type III domain containing 1	208.133	100.295	-1.051	8.60777e-05
ENSMUSG00000073705	GSMG0028664	Apitd1	apoptosis-inducing, TAF9-like domain 1	252.138	104.718	-1.26905	6.19105e-07
ENSMUSG00000074259	GSMG0039626	Gramd2	GRAM domain containing 2	102.85	40.1492	-1.36661	0.000228915
ENSMUSG00000074476	GSMG0040444	Spc24	SPC24, NDC80 kinetochore complex component, homolog (S. cerevisiae)	420.522	167.838	-1.32016	1.1108e-07
ENSMUSG00000074802	GSMG0004444	Gas2l3	growth arrest-specific 2 like 3	460.498	223.606	-1.03858	2.65354e-07
ENSMUSG00000075304	GSMG0021190	Sp5	trans-acting transcription factor 5	203.899	102.352	-1.00512	0.00052085
ENSMUSG00000075316	GSMG0022921	Scn9a	sodium channel, voltage-gated, type IX, alpha	258.438	19.9547	-3.68521	3.56694e-36
ENSMUSG00000075334	GSMG0022825	Rprm	reprimo, TP53 dependent G2 arrest mediator candidate	1007.65	418.234	-1.27045	2.77473e-13
ENSMUSG00000076437	GSMG0023058	2700094K13Rik	RIKEN cDNA 2700094K13 gene	1653.65	824.413	-1.00368	1.7616e-08
ENSMUSG00000078444	GSMG0004283	Gm10941	predicted gene 10941	72.5971	27.484	-1.41545	0.000626073
ENSMUSG00000078532	GSMG0027145	Nkain1	Na+/K+ transporting ATPase interacting 1	293.368	75.7103	-1.94463	1.63504e-13
ENSMUSG00000079685	GSMG0041529	Ulbp1	UL16 binding protein 1	56.3674	26.2709	-1.09021	0.0188295
ENSMUSG00000084946	GSMG0022957	Dlx1as	distal-less homeobox 1, antisense	262.623	110.106	-1.25916	1.54059e-07
ENSMUSG00000087141	GSMG0015773	Plcxd2	phosphatidylinositol-specific phospholipase C, X domain containing 2	69.3875	25.6207	-1.42637	0.000770402
ENSMUSG00000090061	GSMG0029198	Nwd2	NACHT and WD repeat domain containing 2	265.493	114.32	-1.20597	1.16083e-06
ENSMUSG00000090125	GSMG0027043	Pou3f1	POU domain, class 3, transcription factor 1	1501.23	631.847	-1.25178	3.80413e-10
ENSMUSG00000091002	GSMG0036815	Tcerg1l	transcription elongation regulator 1-like	167.679	76.5055	-1.13073	5.9028e-05
ENSMUSG00000093930	GSMG0043189	Hmgcs1	3-hydroxy-3-methylglutaryl-Coenzyme A synthase 1	3256.53	1588.31	-1.03516	5.11604e-14
ENSMUSG00000094500	GSMG0038270	Smim18	small integral membrane protein 18	151.549	69.095	-1.14381	8.898e-05
ENSMUSG00000094910	GSMG0008494	D430019H16Rik	RIKEN cDNA D430019H16 gene	697.349	288.142	-1.27305	1.54053e-12
ENSMUSG00000098087	GSMG0010916	Gm17750	predicted gene, 17750	193.794	66.9043	-1.54182	9.62709e-09
ENSMUSG00000098120	GSMG0065163	Gm5914	predicted gene 5914	171.758	83.0809	-1.06093	0.000309398

## Sheet: Unchanged
Ensembl reference name	id	Gene symbol	Description	baseMean P5	baseMean P15	log2FoldChange (P15 v. P5)	padj
ENSMUSG00000000001	GSMG0025919	Gnai3	guanine nucleotide binding protein (G protein), alpha inhibiting 3	1735.45	1368.47	-0.342306	0.0773194
ENSMUSG00000000056	GSMG0043670	Narf	nuclear prelamin A recognition factor	764.32	876.465	0.199851	0.49964
ENSMUSG00000000058	GSMG0031519	Cav2	caveolin 2	2226.02	4238.78	0.92902	3.45487e-07
ENSMUSG00000000078	GSMG0009400	Klf6	Kruppel-like factor 6	1558.94	2110.68	0.437913	0.0346235
ENSMUSG00000000085	GSMG0027013	Scmh1	sex comb on midleg homolog 1	484.262	453.561	-0.0936166	0.758206
ENSMUSG00000000088	GSMG0039583	Cox5a	cytochrome c oxidase subunit Va	3400.48	3120.79	-0.124289	0.66312
ENSMUSG00000000093	GSMG0005699	Tbx2	T-box 2	850.757	1442.4	0.760691	0.00472028
ENSMUSG00000000127	GSMG0016849	Fer	fer (fms/fps related) protein kinase	444.444	472.084	0.0893563	0.806697
ENSMUSG00000000131	GSMG0036641	Xpo6	exportin 6	3457.82	2870.52	-0.268456	0.193425
ENSMUSG00000000134	GSMG0041562	Tfe3	transcription factor E3	838.057	912.382	0.123028	0.628725
ENSMUSG00000000142	GSMG0006054	Axin2	axin 2	498.297	515.828	0.0488631	0.964959
ENSMUSG00000000148	GSMG0029990	Brat1	BRCA1-associated ATM activator 1	573.42	678.155	0.242253	0.424275
ENSMUSG00000000149	GSMG0031296	Gna12	guanine nucleotide binding protein, alpha 12	757.125	893.341	0.237115	0.578917
ENSMUSG00000000159,ENSMUSG00000090223	GSMG0015351	Igsf5 // Pcp4	immunoglobulin superfamily, member 5 // Purkinje cell protein 4	500.357	469.317	-0.0936094	0.751099
ENSMUSG00000000168	GSMG0040738	Dlat	dihydrolipoamide S-acetyltransferase (E2 component of pyruvate dehydrogenase complex)	1214.32	1156.07	-0.0710317	0.784464
ENSMUSG00000000171	GSMG0040736	Sdhd	succinate dehydrogenase complex, subunit D, integral membrane protein	4378.59	3777.73	-0.212899	0.285689
ENSMUSG00000000184	GSMG0033704	Ccnd2	cyclin D2	1717.3	1626.84	-0.0775384	0.792839
ENSMUSG00000000194	GSMG0020900	Gpr107	G protein-coupled receptor 107	1234.5	1158.76	-0.0914895	0.718323
ENSMUSG00000000197	GSMG0050925	Nalcn	sodium leak channel, non-selective	97.3996	87.3659	-0.150486	0.789508
ENSMUSG00000000202	GSMG0007609	Btbd17	BTB (POZ) domain containing 17	296.68	425.04	0.519093	0.0366994
ENSMUSG00000000223	GSMG0042094	Drp2	dystrophin related protein 2	402.126	497.01	0.307889	0.246218
ENSMUSG00000000247	GSMG0020994	Lhx2	LIM homeobox protein 2	363.85	203.39	-0.838413	0.000327748
ENSMUSG00000000253	GSMG0009717	Gmpr	guanosine monophosphate reductase	1787.93	1239.31	-0.528776	0.000461512
ENSMUSG00000000266	GSMG0042153	Mid2	midline 2	113.025	99.7078	-0.173488	0.721275
ENSMUSG00000000275	GSMG0005754	Trim25	tripartite motif-containing 25	420.462	407.994	-0.0442994	0.920671
ENSMUSG00000000276	GSMG0007217	Dgke	diacylglycerol kinase, epsilon	198.038	175.272	-0.174993	0.621363
ENSMUSG00000000278	GSMG0007213	Scpep1	serine carboxypeptidase 1	1319.54	1236.12	-0.0938802	0.718579
ENSMUSG00000000295	GSMG0002851	Hddc2	HD domain containing 2	507.585	419.468	-0.275834	0.223535
ENSMUSG00000000296	GSMG0003949	Tpd52l1	tumor protein D52-like 1	1562.26	1741.4	0.156683	0.612533
ENSMUSG00000000301	GSMG0006746	Pemt	phosphatidylethanolamine N-methyltransferase	82.9758	49.2489	-0.74875	0.0535647
ENSMUSG00000000305	GSMG0022284	Cdh4	cadherin 4	110.351	75.043	-0.561303	0.138849
ENSMUSG00000000308	GSMG0021664	Ckmt1	creatine kinase, mitochondrial 1, ubiquitous	504.806	773.747	0.616431	0.00122831
ENSMUSG00000000317	GSMG0006899	Bcl6b	B cell CLL/lymphoma 6, member B	428.447	472.626	0.143769	0.601917
ENSMUSG00000000325	GSMG0014751	Arvcf	armadillo repeat gene deleted in velo-cardio-facial syndrome	1335.58	1309.05	-0.0283405	0.942194
ENSMUSG00000000326	GSMG0050903	Comt	catechol-O-methyltransferase	1087.77	1144.7	0.0747516	0.7998
ENSMUSG00000000339	GSMG0025970	Rtca	RNA 3'-terminal phosphate cyclase	1578.19	1304.02	-0.275026	0.14435
ENSMUSG00000000340	GSMG0024846	Dbt	dihydrolipoamide branched chain transacylase E2	197.049	182.364	-0.106855	0.81282
ENSMUSG00000000346	GSMG0013649	Dazap2	DAZ associated protein 2	5983.21	6526.17	0.125393	0.580344
ENSMUSG00000000355	GSMG0041695	Mcts1	malignant T cell amplified sequence 1	760.789	643.238	-0.242736	0.302032
ENSMUSG00000000359	GSMG0021979	Rem1	rad and gem related GTP binding protein 1	213.431	348.276	0.705553	0.00254626
ENSMUSG00000000374	GSMG0004296	Trappc10	trafficking protein particle complex 10	496.878	484.125	-0.0368848	0.933197
ENSMUSG00000000378	GSMG0004868	Ccm2	cerebral cavernous malformation 2	1018.33	1003.24	-0.0211068	0.942758
ENSMUSG00000000384	GSMG0006329	Tbrg4	transforming growth factor beta regulated gene 4	534.427	477.042	-0.165022	0.554139
ENSMUSG00000000399	GSMG0033700	Ndufa9	NADH dehydrogenase (ubiquinone) 1 alpha subcomplex, 9	2875.38	2237.89	-0.361412	0.0424341
ENSMUSG00000000416	GSMG0032759	Cttnbp2	cortactin binding protein 2	1729.75	2014.84	0.219782	0.281816
ENSMUSG00000000420	GSMG0018133	Galnt1	UDP-N-acetyl-alpha-D-galactosamine:polypeptide N-acetylgalactosaminyltransferase 1	2672.33	2906.3	0.120895	0.587143
ENSMUSG00000000439	GSMG0032357	Mkrn2	makorin, ring finger protein, 2	567.221	538.141	-0.0762248	0.79107
ENSMUSG00000000441	GSMG0033554	Raf1	v-raf-leukemia viral oncogene 1	3264.53	2892.26	-0.174638	0.419505
ENSMUSG00000000486	GSMG0036687	Sept1	septin 1	206.115	117.531	-0.819665	0.00221613
ENSMUSG00000000489	GSMG0014263	Pdgfb	platelet derived growth factor, B polypeptide	1333.21	1781.82	0.418468	0.017268
ENSMUSG00000000530	GSMG0013660	Acvrl1	activin A receptor, type II-like 1	2837.81	5108.72	0.84826	3.07566e-08
ENSMUSG00000000531	GSMG0013662	Grasp	GRP1 (general receptor for phosphoinositides 1)-associated scaffold protein	892.618	1532.37	0.779539	6.26072e-07
ENSMUSG00000000532	GSMG0013661	Acvr1b	activin A receptor, type 1B	181.26	97.0196	-0.894708	0.000970557
ENSMUSG00000000538	GSMG0006749	Tom1l2	target of myb1-like 2 (chicken)	1283.07	1913.3	0.576588	0.00131513
ENSMUSG00000000552	GSMG0014581	Zfp385a	zinc finger protein 385A	307.779	308.242	-0.00197426	0.997064
ENSMUSG00000000555	GSMG0014582	Itga5	integrin alpha 5 (fibronectin receptor alpha)	3792.65	2950.97	-0.362262	0.0278268
ENSMUSG00000000560	GSMG0030599	Gabra2	gamma-aminobutyric acid (GABA) A receptor, subunit alpha 2	569.66	490.124	-0.214884	0.514454
ENSMUSG00000000561,ENSMUSG00000074340	GSMG0024787	Wdr77 // Ovgp1	WD repeat domain 77 // oviductal glycoprotein 1	1181	850.047	-0.472293	0.0193798
ENSMUSG00000000563	GSMG0025874	Atp5f1	ATP synthase, H+ transporting, mitochondrial F0 complex, subunit B1	2759.4	2377.37	-0.214596	0.289436
ENSMUSG00000000567	GSMG0006075	Sox9	SRY (sex determining region Y)-box 9	1196.95	954.877	-0.328134	0.206641
ENSMUSG00000000568	GSMG0030783	Hnrnpd	heterogeneous nuclear ribonucleoprotein D	2344.27	1646.69	-0.510578	0.0181543
ENSMUSG00000000581	GSMG0004907	C1d	C1D nuclear receptor co-repressor	1701.68	1273.65	-0.418788	0.0834982
ENSMUSG00000000594	GSMG0005211	Gm2a	GM2 ganglioside activator protein	3420.42	4180.02	0.289328	0.0984123
ENSMUSG00000000600	GSMG0028787	Krit1	KRIT1, ankyrin repeat containing	1553.13	1463.09	-0.0859515	0.751794
ENSMUSG00000000605	GSMG0035488	Clcn4	chloride channel, voltage-sensitive 4	4879.37	4061.4	-0.264414	0.128657
ENSMUSG00000000627	GSMG0033231	Sema4f	sema domain, immunoglobulin domain (Ig), TM domain, and short cytoplasmic domain	257.555	189.649	-0.4401	0.210075
ENSMUSG00000000631	GSMG0043703	Myo18a	myosin XVIIIA	3829.44	3388.4	-0.176749	0.62691
ENSMUSG00000000686	GSMG0043704	Abhd15	abhydrolase domain containing 15	312.037	254.713	-0.294891	0.316654
ENSMUSG00000000693	GSMG0032106	Loxl3	lysyl oxidase-like 3	866.3	787.352	-0.137812	0.61073
ENSMUSG00000000708	GSMG0016797	Kat2b	K(lysine) acetyltransferase 2B	341.797	505.278	0.562719	0.00467794
ENSMUSG00000000732	GSMG0003205	Icosl	icos ligand	57.9605	115.28	0.988334	0.00268242
ENSMUSG00000000738	GSMG0037952	Spg7	spastic paraplegia 7 homolog (human)	1207.36	1124.78	-0.101703	0.687565
ENSMUSG00000000743	GSMG0039037	Chmp1a	charged multivesicular body protein 1A	881.516	875.784	-0.00959736	0.974257
ENSMUSG00000000751	GSMG0006980	Rpa1	replication protein A1	2378.59	1702.82	-0.481752	0.0166157
ENSMUSG00000000753	GSMG0006982	Serpinf1	serine (or cysteine) peptidase inhibitor, clade F, member 1	1430.56	1835.34	0.360564	0.130266
ENSMUSG00000000759	GSMG0038104	Tubgcp3	tubulin, gamma complex associated protein 3	1626.06	1566.5	-0.0536662	0.832282
ENSMUSG00000000776	GSMG0012614	Polr3d	polymerase (RNA) III (DNA directed) polypeptide D	570.553	391.553	-0.544054	0.00347008
ENSMUSG00000000782	GSMG0006647	Tcf7	transcription factor 7, T cell specific	909.495	931.567	0.0346733	0.919485
ENSMUSG00000000787	GSMG0041607	Ddx3x	DEAD/H (Asp-Glu-Ala-Asp/His) box polypeptide 3, X-linked	2377.46	2342.6	-0.0206857	0.951727
ENSMUSG00000000792	GSMG0038569	Slc5a5	solute carrier family 5 (sodium iodide symporter), member 5	452.903	813.628	0.843654	1.88304e-05
ENSMUSG00000000804	GSMG0007141	Usp32	ubiquitin specific peptidase 32	354.159	326.128	-0.120481	0.693936
ENSMUSG00000000805	GSMG0005688	Car4	carbonic anhydrase 4	10611.7	16696.2	0.65394	8.34995e-05
ENSMUSG00000000811	GSMG0032205	Txnrd3	thioredoxin reductase 3	270.972	246.976	-0.136409	0.695939
ENSMUSG00000000823	GSMG0024046	Zfp512b	zinc finger protein 512B	2308.83	1891.96	-0.287556	0.386942
ENSMUSG00000000826	GSMG0022324	Dnajc5	DnaJ heat shock protein family (Hsp40) member C5	911.262	688.041	-0.406243	0.0641984
ENSMUSG00000000827	GSMG0022323	Tpd52l2	tumor protein D52-like 2	771.309	738.986	-0.0603448	0.857607
ENSMUSG00000000838	GSMG0041799	Fmr1	fragile X mental retardation syndrome 1	717.442	556.915	-0.365021	0.0905173
ENSMUSG00000000876	GSMG0023738	Pxmp4	peroxisomal membrane protein 4	707.24	781.383	0.144045	0.573043
ENSMUSG00000000881	GSMG0041958	Dlg3	discs, large homolog 3 (Drosophila)	1134.63	1005.65	-0.173992	0.417317
ENSMUSG00000000884	GSMG0014755	Gnb1l	guanine nucleotide binding protein (G protein), beta polypeptide 1-like	120.295	87.9907	-0.445114	0.210796
ENSMUSG00000000901	GSMG0004263	Mmp11	matrix metallopeptidase 11	274.545	201.369	-0.446152	0.0872668
ENSMUSG00000000902	GSMG0004262	Smarcb1	SWI/SNF related, matrix associated, actin dependent regulator of chromatin, subfamily b, member 1	1673.4	1215.61	-0.461031	0.00870339
ENSMUSG00000000915	GSMG0029806	Hip1r	huntingtin interacting protein 1 related	1161.59	1351.08	0.217657	0.487938
ENSMUSG00000000916	GSMG0029904	Nsun5	NOL1/NOP2/Sun domain family, member 5	535.035	464.648	-0.201749	0.418731
ENSMUSG00000000934	GSMG0014139	Top1mt	DNA topoisomerase 1, mitochondrial	529.44	364.968	-0.537962	0.0101843
ENSMUSG00000000957	GSMG0011570	Mmp14	matrix metallopeptidase 14 (membrane-inserted)	2721.87	1950.37	-0.480468	0.00141403
ENSMUSG00000000959	GSMG0011568	Oxa1l	oxidase assembly 1-like	1235.09	1055.26	-0.225987	0.28191
ENSMUSG00000000976	GSMG0005672	Heatr6	HEAT repeat containing 6	871.115	678.792	-0.359118	0.0830153
ENSMUSG00000001016	GSMG0024579	Ilf2	interleukin enhancer binding factor 2	1013.04	742.104	-0.448846	0.0306228
ENSMUSG00000001017	GSMG0025669	Chtop	chromatin target of PRMT1	739.844	643.507	-0.200073	0.425607
ENSMUSG00000001018	GSMG0025668	Snapin	SNAP-associated protein	2197.3	2559.36	0.219825	0.233423
ENSMUSG00000001025	GSMG0024587	S100a6	S100 calcium binding protein A6 (calcyclin)	167.427	282.219	0.750538	0.00569684
ENSMUSG00000001029	GSMG0007513	Icam2	intercellular adhesion molecule 2	3708.4	5292.82	0.513406	0.00512038
ENSMUSG00000001034	GSMG0006770	Mapk7	mitogen-activated protein kinase 7	1615.35	1677.06	0.0539984	0.865426
ENSMUSG00000001036	GSMG0006774	Epn2	epsin 2	1994.88	2291.38	0.199918	0.296192
ENSMUSG00000001039	GSMG0005307	B9d1	B9 protein domain 1	355.064	346.238	-0.0343706	0.924003
ENSMUSG00000001052	GSMG0026059	Sec24b	Sec24 related gene family, member B (S. cerevisiae)	1419.06	1286.5	-0.140848	0.589959
ENSMUSG00000001053	GSMG0006637	N4bp3	NEDD4 binding protein 3	1846.21	1737.51	-0.0878742	0.739254
ENSMUSG00000001054	GSMG0006635	Rmnd5b	required for meiotic nuclear division 5 homolog B	1563.81	1605.68	0.03867	0.896981
ENSMUSG00000001056	GSMG0005163	Nhp2	NHP2 ribonucleoprotein	1271.71	709.1	-0.842855	2.47982e-07
ENSMUSG00000001062	GSMG0039039	Vps9d1	VPS9 domain containing 1	1343.7	1445.37	0.106245	0.712409
ENSMUSG00000001065	GSMG0037960	Zfp276	zinc finger protein (C2H2 type) 276	582.255	749.137	0.364634	0.15934
ENSMUSG00000001082	GSMG0030374	Mfsd10	major facilitator superfamily domain containing 10	2777.97	2070.83	-0.423228	0.0110711
ENSMUSG00000001089	GSMG0051019	Luzp1	leucine zipper protein 1	6247.02	7730.49	0.307265	0.0529232
ENSMUSG00000001098	GSMG0030950	Kctd10	potassium channel tetramerisation domain containing 10	2373.7	2849.45	0.263453	0.157819
ENSMUSG00000001100	GSMG0005600	Poldip2	polymerase (DNA-directed), delta interacting protein 2	3485.92	3263.96	-0.0948161	0.683907
ENSMUSG00000001105	GSMG0005595	Ift20	intraflagellar transport 20	1262.44	1478.2	0.227339	0.322207
ENSMUSG00000001120	GSMG0004275	Pcbp3	poly(rC) binding protein 3	513.658	426.833	-0.267406	0.285211
ENSMUSG00000001123	GSMG0007060	Lgals9	lectin, galactose binding, soluble 9	2964.82	2733.36	-0.116718	0.660028
ENSMUSG00000001127	GSMG0041631	Araf	Araf proto-oncogene, serine/threonine kinase	1713.95	1607.57	-0.0918988	0.710683
ENSMUSG00000001131	GSMG0041633	Timp1	tissue inhibitor of metalloproteinase 1	290.311	168.734	-0.776125	0.00250453
ENSMUSG00000001134	GSMG0042397	Uxt	ubiquitously expressed transcript	168.398	154.44	-0.119702	0.770858
ENSMUSG00000001138	GSMG0000143	Cnnm3	cyclin M3	174.507	289.033	0.726592	0.0543217
ENSMUSG00000001143	GSMG0001469	Lman2l	lectin, mannose-binding 2-like	237.064	261.589	0.14249	0.651417
ENSMUSG00000001150	GSMG0003182	Mcm3ap	minichromosome maintenance complex component 3 associated protein	2300.01	2281.98	-0.0114211	0.97669
ENSMUSG00000001151	GSMG0004268	Pcnt	pericentrin (kendrin)	627.174	651.013	0.0525783	0.88973
ENSMUSG00000001156	GSMG0033306	Mxd1	MAX dimerization protein 1	737.428	959.068	0.379111	0.0533913
ENSMUSG00000001157	GSMG0033309	Gmcl1	germ cell-less, spermatogenesis associated 1	1539.85	1690.78	0.134323	0.554129
ENSMUSG00000001158	GSMG0033308	Snrnp27	small nuclear ribonucleoprotein 27 (U4/U6.U5)	1000.49	769.239	-0.380034	0.196389
ENSMUSG00000001173	GSMG0041723	Ocrl	oculocerebrorenal syndrome of Lowe	1183.48	1411.74	0.254091	0.194287
ENSMUSG00000001175	GSMG0008440	Calm1	calmodulin 1	45069.6	42121.3	-0.0976463	0.737456
ENSMUSG00000001211	GSMG0004298	Agpat3	1-acylglycerol-3-phosphate O-acyltransferase 3	1961.53	2385.63	0.282553	0.267608
ENSMUSG00000001227	GSMG0017687	Sema6b	sema domain, transmembrane domain (TM), and cytoplasmic domain, (semaphorin) 6B	979.511	971.31	-0.0120445	0.979099
ENSMUSG00000001229	GSMG0017689	Dpp9	dipeptidylpeptidase 9	2060.98	2168.35	0.0731534	0.806165
ENSMUSG00000001240	GSMG0065019	Ramp2	receptor (calcitonin) activity modifying protein 2	13687.2	14598.1	0.0929396	0.694763
ENSMUSG00000001247	GSMG0035766	Lsr	lipolysis stimulated lipoprotein receptor	8149.35	10058.6	0.303769	0.0639488
ENSMUSG00000001248	GSMG0035774	Gramd1a	GRAM domain containing 1A	2823.22	2361	-0.25748	0.22786
ENSMUSG00000001260	GSMG0030598	Gabrg1	gamma-aminobutyric acid (GABA) A receptor, subunit gamma 1	150.239	118.063	-0.347598	0.287168
ENSMUSG00000001270	GSMG0009336	Ckb	creatine kinase, brain	5850	8398.7	0.521686	0.00122831
ENSMUSG00000001280	GSMG0013692	Sp1	trans-acting transcription factor 1	1307.31	1129.21	-0.211882	0.280336
ENSMUSG00000001285	GSMG0013690	Myg1	melanocyte proliferating gene 1	495	445.168	-0.154773	0.570512
ENSMUSG00000001288	GSMG0014554	Rarg	retinoic acid receptor, gamma	293.637	340.323	0.20903	0.653724
ENSMUSG00000001289	GSMG0013689	Pfdn5	prefoldin 5	1434.45	1194.12	-0.265827	0.242103
ENSMUSG00000001300	GSMG0038057	Efnb2	ephrin B2	2430.65	2531.07	0.0579242	0.850671
ENSMUSG00000001305	GSMG0002605	Rrp15	ribosomal RNA processing 15 homolog (S. cerevisiae)	544.843	370.356	-0.558151	0.013795
ENSMUSG00000001313	GSMG0005946	Rnd2	Rho family GTPase 2	710.353	1003.92	0.498856	0.006106
ENSMUSG00000001323	GSMG0006974	Srr	serine racemase	457.987	461	0.0116011	0.974257
ENSMUSG00000001334	GSMG0027118	Fndc5	fibronectin type III domain containing 5	100.778	189.143	0.906124	0.00607479
ENSMUSG00000001348	GSMG0040469	Acp5	acid phosphatase 5, tartrate resistant	159.256	132.224	-0.261231	0.509898
ENSMUSG00000001366	GSMG0041042	Fbxo9	f-box protein 9	1311.01	1495.87	0.190288	0.358237
ENSMUSG00000001376	GSMG0031430	Vps50	VPS50 EARP/GARPII complex subunit	440.71	424.412	-0.0528654	0.871686
ENSMUSG00000001380	GSMG0018862	Hars	histidyl-tRNA synthetase	2063.31	1809.66	-0.188313	0.391566
ENSMUSG00000001383	GSMG0018263	Zmat2	zinc finger, matrin type 2	1024.05	934.902	-0.131379	0.612639
ENSMUSG00000001415	GSMG0024515	Smg5	Smg-5 homolog, nonsense mediated mRNA decay factor (C. elegans)	2820.69	2848.52	0.0137695	0.969598
ENSMUSG00000001416	GSMG0024513	Cct3	chaperonin containing Tcp1, subunit 3 (gamma)	4399.29	3214.34	-0.452149	0.0184362
ENSMUSG00000001418	GSMG0024514	Glmp	glycosylated lysosomal membrane protein	2481.83	2807.01	0.177801	0.365356
ENSMUSG00000001419	GSMG0024509	Mef2d	myocyte enhancer factor 2D	1318.31	1281.26	-0.0415249	0.893017
ENSMUSG00000001424	GSMG0031581	Snd1	staphylococcal nuclease and tudor domain containing 1	5094.08	3742.94	-0.444607	0.00154639
ENSMUSG00000001435	GSMG0004282	Col18a1	collagen, type XVIII, alpha 1	8546.73	6563.59	-0.380886	0.107566
ENSMUSG00000001436	GSMG0003189	Slc19a1	solute carrier family 19 (folate transporter), member 1	2958.05	3508.51	0.246376	0.174735
ENSMUSG00000001440	GSMG0007302	Kpnb1	karyopherin (importin) beta 1	1549.59	1218.17	-0.348025	0.169105
ENSMUSG00000001441	GSMG0007303	Npepps	aminopeptidase puromycin sensitive	995.379	902.534	-0.141254	0.523577
ENSMUSG00000001445	GSMG0005854	Mrpl10	mitochondrial ribosomal protein L10	449.035	323.738	-0.470682	0.0416211
ENSMUSG00000001467	GSMG0030130	Cyp51	cytochrome P450, family 51	1355.81	855.383	-0.663704	3.43786e-05
ENSMUSG00000001472	GSMG0037964	Tcf25	transcription factor 25 (basic helix-loop-helix)	5441.7	6050.58	0.153152	0.534996
ENSMUSG00000001473	GSMG0018529	Tubb6	tubulin, beta 6 class V	4588.35	2726.89	-0.750207	3.75339e-06
ENSMUSG00000001482	GSMG0037950	Def8	differentially expressed in FDCP 8	578.695	557.774	-0.0523813	0.87211
ENSMUSG00000001493	GSMG0007428	Meox1	mesenchyme homeobox 1	2141.66	1732.57	-0.305195	0.114272
ENSMUSG00000001506	GSMG0005795	Col1a1	collagen, type I, alpha 1	7734.39	6534.33	-0.243556	0.410328
ENSMUSG00000001507	GSMG0007263	Itga3	integrin alpha 3	105.316	143.986	0.451166	0.189278
ENSMUSG00000001518	GSMG0033726	Itfg2	integrin alpha FG-GAP repeat containing 2	425.719	383.511	-0.151515	0.583489
ENSMUSG00000001524	GSMG0017472	Gtf2h4	general transcription factor II H, polypeptide 4	437.469	409.768	-0.0917947	0.772245
ENSMUSG00000001542	GSMG0009948	Ell2	elongation factor RNA polymerase II 2	170.345	155.292	-0.136022	0.736146
ENSMUSG00000001552	GSMG0007388	Jup	junction plakoglobin	5034.57	4756.19	-0.0821183	0.796195
ENSMUSG00000001555	GSMG0005914	Fkbp10	FK506 binding protein 10	2865.91	2098.27	-0.449092	0.0244864
ENSMUSG00000001569	GSMG0028971	Nom1	nucleolar protein with MIF4G domain 1	1053.68	790.494	-0.414181	0.0170937
ENSMUSG00000001576	GSMG0016409	Ergic1	endoplasmic reticulum-golgi intermediate compartment (ERGIC) 1	1339.77	960.222	-0.479474	0.0139757
ENSMUSG00000001627	GSMG0008820	Ifrd1	interferon-related developmental regulator 1	967.675	880.099	-0.136227	0.586818
ENSMUSG00000001630	GSMG0032656	Stk38l	serine/threonine kinase 38 like	80.9492	100.406	0.306981	0.483701
ENSMUSG00000001632	GSMG0032329	Brpf1	bromodomain and PHD finger containing, 1	711.392	728.138	0.033247	0.929154
ENSMUSG00000001663	GSMG0004257	Gstt1	glutathione S-transferase, theta 1	74.8067	102.109	0.450775	0.232918
ENSMUSG00000001666	GSMG0004255	Ddt	D-dopachrome tautomerase	369.893	350.845	-0.0810854	0.849836
ENSMUSG00000001687	GSMG0031386	Ubl3	ubiquitin-like 3	3916.62	4815.82	0.297991	0.0758505
ENSMUSG00000001700	GSMG0018419	Gramd3	GRAM domain containing 3	414.867	406.346	-0.0274013	0.94053
ENSMUSG00000001707	GSMG0010565	Eef1e1	eukaryotic translation elongation factor 1 epsilon 1	461.861	250.107	-0.884698	1.78012e-05
ENSMUSG00000001729	GSMG0009350	Akt1	thymoma viral proto-oncogene 1	6417.16	6711.7	0.0646324	0.865016
ENSMUSG00000001750	GSMG0019913	Tcirg1	T cell, immune regulator 1, ATPase, H+ transporting, lysosomal V0 protein A3	998.708	914.694	-0.125949	0.636224
ENSMUSG00000001751	GSMG0005928	Naglu	alpha-N-acetylglucosaminidase (Sanfilippo disease IIIB)	227.958	274.356	0.27288	0.420655
ENSMUSG00000001755	GSMG0060485	Coasy	Coenzyme A synthase	582.953	507.738	-0.19854	0.406473
ENSMUSG00000001761	GSMG0031603	Smo	smoothened, frizzled class receptor	580.986	577.302	-0.0075613	0.98529
ENSMUSG00000001763	GSMG0031601	Tspan33	tetraspanin 33	72.4542	133.747	0.883906	0.0101853
ENSMUSG00000001767	GSMG0023637	Crnkl1	Crn, crooked neck-like 1 (Drosophila)	1086.91	975.681	-0.155075	0.527651
ENSMUSG00000001768	GSMG0021912	Rin2	Ras and Rab interactor 2	194.169	312.401	0.688048	0.00365541
ENSMUSG00000001774	GSMG0039175	Chordc1	cysteine and histidine-rich domain (CHORD)-containing, zinc-binding protein 1	643.837	668.832	0.0557275	0.860969
ENSMUSG00000001783	GSMG0004413	Rtcb	RNA 2',3'-cyclic phosphate and 5'-OH ligase	2398.25	2024.29	-0.243665	0.257916
ENSMUSG00000001785	GSMG0003347	Pwp1	PWP1 homolog, endonuclein	1100.82	781.991	-0.491356	0.00998491
ENSMUSG00000001786	GSMG0003349	Fbxo7	F-box protein 7	237.882	328.837	0.466662	0.0365293
ENSMUSG00000001794	GSMG0035734	Capns1	calpain, small subunit 1	1335.72	1589.36	0.249735	0.380842
ENSMUSG00000001802	GSMG0035801	Lrp3	low density lipoprotein receptor-related protein 3	760.059	1102.39	0.53638	0.476071
ENSMUSG00000001829	GSMG0034901	Clpb	ClpB caseinolytic peptidase B	1327.48	1111.91	-0.254766	0.202787
ENSMUSG00000001833	GSMG0039257	Sept7	septin 7	7250.55	7899.49	0.12363	0.672344
ENSMUSG00000001844	GSMG0031325	Zdhhc4	zinc finger, DHHC domain containing 4	1319.81	1276.81	-0.0474093	0.863402
ENSMUSG00000001847	GSMG0031329	Rac1	RAS-related C3 botulinum substrate 1	15797.6	14836.2	-0.090661	0.714006
ENSMUSG00000001855	GSMG0020911	Nup214	nucleoporin 214	1920.96	1732.99	-0.148655	0.546908
ENSMUSG00000001864	GSMG0020910	Aif1l	allograft inflammatory factor 1-like	1708.93	2064.21	0.272876	0.273738
ENSMUSG00000001891	GSMG0006393	Ugp2	UDP-glucose pyrophosphorylase 2	2918.29	2321.68	-0.330413	0.154346
ENSMUSG00000001909	GSMG0037538	Trmt1	tRNA methyltransferase 1	1920.73	1756.07	-0.128479	0.609577
ENSMUSG00000001910	GSMG0038684	Nacc1	nucleus accumbens associated 1, BEN and BTB (POZ) domain containing	1021.98	898.061	-0.187937	0.597768
ENSMUSG00000001911	GSMG0038687	Nfix	nuclear factor I/X	2322.5	1344.5	-0.789184	4.31263e-05
ENSMUSG00000001918	GSMG0034061	Slc1a5	solute carrier family 1 (neutral amino acid transporter), member 5	398.894	433.773	0.121658	0.694551
ENSMUSG00000001924	GSMG0041628	Uba1	ubiquitin-like modifier activating enzyme 1	8201.43	5957.38	-0.461175	0.00154639
ENSMUSG00000001930	GSMG0032492	Vwf	Von Willebrand factor	5090.49	4345.14	-0.228384	0.778544
ENSMUSG00000001942	GSMG0039355	Siae	sialic acid acetylesterase	164.505	197.958	0.272232	0.417569
ENSMUSG00000001943	GSMG0039354	Vsig2	V-set and immunoglobulin domain containing 2	387.916	404.529	0.0634888	0.867331
ENSMUSG00000001946	GSMG0039353	Esam	endothelial cell-specific adhesion molecule	11339.5	14967.1	0.400542	0.0128303
ENSMUSG00000001962	GSMG0041858	Fam50a	family with sequence similarity 50, member A	1078.67	1203.95	0.159642	0.531919
ENSMUSG00000001983	GSMG0006027	Taco1	translational activator of mitochondrially encoded cytochrome c oxidase I	155.197	134.79	-0.205159	0.632364
ENSMUSG00000001986	GSMG0041699	Gria3	glutamate receptor, ionotropic, AMPA3 (alpha 3)	368.084	704.976	0.938714	6.16226e-07
ENSMUSG00000001988	GSMG0035542	Npas1	neuronal PAS domain protein 1	246.899	149.3	-0.722686	0.0140029
ENSMUSG00000001995	GSMG0039067	Sipa1l2	signal-induced proliferation-associated 1 like 2	1051.09	984.142	-0.0951901	0.796201
ENSMUSG00000001998	GSMG0021735	Ap4e1	adaptor-related protein complex AP-4, epsilon 1	122.181	102.092	-0.265259	0.513691
ENSMUSG00000001999	GSMG0021737	Blvra	biliverdin reductase A	658.953	601.894	-0.12984	0.679355
ENSMUSG00000002010	GSMG0042596	Idh3g	isocitrate dehydrogenase 3 (NAD+), gamma	2821.38	3644.86	0.370033	0.0646037
ENSMUSG00000002012	GSMG0042594	Pnck	pregnancy upregulated non-ubiquitously expressed CaM kinase	1845.04	1603.5	-0.201998	0.452927
ENSMUSG00000002014	GSMG0041847	Ssr4	signal sequence receptor, delta	1657.93	1672.47	0.0125796	0.964019
ENSMUSG00000002015	GSMG0042595	Bcap31	B cell receptor associated protein 31	3053.15	3141.17	0.0410448	0.888534
ENSMUSG00000002017	GSMG0017862	Fam98a	family with sequence similarity 98, member A	403.461	434.947	0.107801	0.754909
ENSMUSG00000002028	GSMG0040672	Kmt2a	lysine (K)-specific methyltransferase 2A	312.519	267.597	-0.226918	0.47245
ENSMUSG00000002031	GSMG0039447	Ift46	intraflagellar transport 46	592.101	531.23	-0.155022	0.557632
ENSMUSG00000002043	GSMG0034117	Trappc6a	trafficking protein particle complex 6A	456.254	500.673	0.132824	0.627588
ENSMUSG00000002052	GSMG0007040	Supt6	suppressor of Ty 6	363.877	349.159	-0.0573884	0.884074
ENSMUSG00000002055	GSMG0005591	Spag5	sperm associated antigen 5	373.611	264.165	-0.494384	0.110331
ENSMUSG00000002058	GSMG0005594	Unc119	unc-119 lipid binding chaperone	462.828	239.371	-0.955851	7.81525e-07
ENSMUSG00000002059	GSMG0005586	Rab34	RAB34, member RAS oncogene family	1269.41	1222.5	-0.0535768	0.870008
ENSMUSG00000002064	GSMG0005588	Sdf2	stromal cell derived factor 2	1331.93	1539.81	0.210163	0.322744
ENSMUSG00000002068	GSMG0035820	Ccne1	cyclin E1	240.809	143.232	-0.748564	0.00474312
ENSMUSG00000002083	GSMG0034050	Bbc3	BCL2 binding component 3	274.603	214.888	-0.36167	0.33298
ENSMUSG00000002102	GSMG0021381	Psmc3	proteasome (prosome, macropain) 26S subunit, ATPase 3	5127.68	4775.4	-0.102485	0.675293
ENSMUSG00000002103	GSMG0021385	Acp2	acid phosphatase 2, lysosomal	1382.38	1405.77	0.025174	0.935553
ENSMUSG00000002105	GSMG0023165	Slc39a13	solute carrier family 39 (metal ion transporter), member 13	293.129	351.895	0.263398	0.325395
ENSMUSG00000002107	GSMG0022366	Celf2	CUGBP, Elav-like family member 2	2031.69	1660.42	-0.290374	0.132921
ENSMUSG00000002108	GSMG0023168	Nr1h3	nuclear receptor subfamily 1, group H, member 3	325.881	417.447	0.35681	0.172803
ENSMUSG00000002109	GSMG0023171	Ddb2	damage specific DNA binding protein 2	85.3193	117.649	0.468729	0.227227
ENSMUSG00000002129	GSMG0004833	Sf3a1	splicing factor 3a, subunit 1	2420.84	1951.02	-0.311112	0.0508399
ENSMUSG00000002147	GSMG0003662	Stat6	signal transducer and activator of transcription 6	1887.66	2735.67	0.535443	0.00256505
ENSMUSG00000002205	GSMG0034442	Vrk3	vaccinia related kinase 3	1011.1	1117.01	0.144565	0.52172
ENSMUSG00000002210	GSMG0034149	Smg9	smg-9 homolog, nonsense mediated mRNA decay factor (C. elegans)	849.877	810.354	-0.0691838	0.831648
ENSMUSG00000002221	GSMG0030289	Paxip1	PAX interacting (with transcription-activation domain) protein 1	1390.96	1232.11	-0.174978	0.47245
ENSMUSG00000002222	GSMG0033156	Rmnd5a	required for meiotic nuclear division 5 homolog A	152.609	231.379	0.597176	0.0633593
ENSMUSG00000002227	GSMG0025859	Mov10	Moloney leukemia virus 10	1200.69	1116.17	-0.105237	0.669491
ENSMUSG00000002228	GSMG0024775	Ppm1j	protein phosphatase 1J	277.571	278.26	0.00505472	0.989605
ENSMUSG00000002233	GSMG0024776	Rhoc	ras homolog family member C	3655.95	3604.34	-0.0206116	0.948285
ENSMUSG00000002250	GSMG0016437	Ppard	peroxisome proliferator activator receptor delta	100.832	109.611	0.108862	0.874609
ENSMUSG00000002257	GSMG0016435	Def6	differentially expressed in FDCP 6	1086.01	1001.47	-0.117968	0.641787
ENSMUSG00000002265	GSMG0035480	Peg3	paternally expressed 3	204.672	212.283	0.0549304	0.900198
ENSMUSG00000002274	GSMG0017257	Metrn	meteorin, glial cell differentiation regulator	212.955	217.649	0.0290364	0.948185
ENSMUSG00000002279	GSMG0016380	Lmf1	lipase maturation factor 1	435.529	387.803	-0.167171	0.533523
ENSMUSG00000002280	GSMG0016385	Narfl	nuclear prelamin A recognition factor-like	608.746	556.125	-0.130516	0.62099
ENSMUSG00000002289	GSMG0017406	Angptl4	angiopoietin-like 4	2669.04	1933.48	-0.464573	0.00988307
ENSMUSG00000002307	GSMG0016528	Daxx	Fas death domain-associated protein	1097.84	911.204	-0.268924	0.189676
ENSMUSG00000002308	GSMG0016525	Cd320	CD320 antigen	1529.01	1489.39	-0.0366641	0.908108
ENSMUSG00000002319	GSMG0012422	Ipo4	importin 4	3168.74	2213.02	-0.517448	0.00557723
ENSMUSG00000002320	GSMG0012423	Tm9sf1	transmembrane 9 superfamily member 1	2414.87	2505.58	0.0536219	0.838425
ENSMUSG00000002325	GSMG0011604	Irf9	interferon regulatory factor 9	615.434	614.979	-0.0012294	0.997627
ENSMUSG00000002326	GSMG0011609	Gmpr2	guanosine monophosphate reductase 2	454.233	435.602	-0.0598251	0.85321
ENSMUSG00000002329	GSMG0012424	Mdp1	magnesium-dependent phosphatase 1	1416.34	1550.12	0.130193	0.552628
ENSMUSG00000002332	GSMG0012430	Dhrs1	dehydrogenase/reductase (SDR family) member 1	1304.22	1446.15	0.149593	0.53573
ENSMUSG00000002342	GSMG0037375	Tmem161a	transmembrane protein 161A	1280.74	1391	0.119727	0.610897
ENSMUSG00000002343	GSMG0038546	Armc6	armadillo repeat containing 6	726.857	536.489	-0.438394	0.0229781
ENSMUSG00000002345,ENSMUSG00000079033	GSMG0060654	2310045n01rik-mef2b // Borcs8 // Mef2b // Gm45929	2310045N01Rik-mef2b readthrough // BLOC-1 related complex subunit 8 // myocyte enhancer factor 2B // predicted gene, 45929	279.015	328.851	0.239829	0.377356
ENSMUSG00000002346	GSMG0038544	Slc25a42	solute carrier family 25, member 42	526.273	512.746	-0.0375191	0.91623
ENSMUSG00000002365	GSMG0016170	Snx9	sorting nexin 9	1524.11	1364.96	-0.158949	0.457956
ENSMUSG00000002372	GSMG0016826	Ranbp3	RAN binding protein 3	1433.92	1143.45	-0.325456	0.0976323
ENSMUSG00000002379	GSMG0016827	Ndufa11	NADH dehydrogenase (ubiquinone) 1 alpha subcomplex 11	2145.83	2025.84	-0.083714	0.772034
ENSMUSG00000002393	GSMG0038573	Nr2f6	nuclear receptor subfamily 2, group F, member 6	2213.05	2041.39	-0.117356	0.62935
ENSMUSG00000002395	GSMG0037413	Use1	unconventional SNARE in the ER 1 homolog (S. cerevisiae)	818.683	863.189	0.0759907	0.802161
ENSMUSG00000002396	GSMG0037414	Ocel1	occludin/ELL domain containing 1	1433.18	1903.49	0.408758	0.0223469
ENSMUSG00000002409	GSMG0034238	Dyrk1b	dual-specificity tyrosine-(Y)-phosphorylation regulated kinase 1b	397.563	541.721	0.446579	0.102142
ENSMUSG00000002413	GSMG0032926	Braf	Braf transforming gene	300.002	375.275	0.324556	0.187292
ENSMUSG00000002416	GSMG0031727	Ndufb2	NADH dehydrogenase (ubiquinone) 1 beta subcomplex, 2	2039.8	1740.37	-0.229806	0.303365
ENSMUSG00000002428	GSMG0024135	Hltf	helicase-like transcription factor	294.332	370.667	0.333193	0.274613
ENSMUSG00000002455	GSMG0022327	Prpf6	pre-mRNA splicing factor 6	600.148	595.688	-0.00887511	0.979793
ENSMUSG00000002458	GSMG0024049	Rgs19	regulator of G-protein signaling 19	905.614	665.604	-0.442864	0.0190228
ENSMUSG00000002477	GSMG0018057	Snrpd1	small nuclear ribonucleoprotein D1	968.708	543.641	-0.833343	1.50036e-07
ENSMUSG00000002486	GSMG0029659	Tchp	trichoplein, keratin filament binding	328.454	289.775	-0.184041	0.521498
ENSMUSG00000002489	GSMG0016046	Tiam1	T cell lymphoma invasion and metastasis 1	942.386	833.677	-0.179018	0.485647
ENSMUSG00000002496	GSMG0017228	Tsc2	tuberous sclerosis 2	4415.58	4603.12	0.0600742	0.851588
ENSMUSG00000002504	GSMG0017229	Slc9a3r2	solute carrier family 9 (sodium/hydrogen exchanger), member 3 regulator 2	10671.5	17664.9	0.727096	1.7269e-07
ENSMUSG00000002524	GSMG0014153	Puf60	poly-U binding splicing factor 60	3120.99	2943.19	-0.0841849	0.736948
ENSMUSG00000002546	GSMG0020917	Golga2	golgi autoantigen, golgin subfamily a, 2	1544.46	1526.34	-0.0168172	0.958426
ENSMUSG00000002550	GSMG0022634	Uck1	uridine-cytidine kinase 1	334.68	325.829	-0.0344466	0.935289
ENSMUSG00000002580	GSMG0007327	Mien1	migration and invasion enhancer 1	1381.14	1116.1	-0.307855	0.130199
ENSMUSG00000002602	GSMG0035656	Axl	AXL receptor tyrosine kinase	4202.53	5095.29	0.277836	0.107182
ENSMUSG00000002603	GSMG0034184	Tgfb1	transforming growth factor, beta 1	605.142	674.454	0.154112	0.716453
ENSMUSG00000002608	GSMG0035654	Ccdc97	coiled-coil domain containing 97	474.437	431.399	-0.136131	0.619596
ENSMUSG00000002617	GSMG0017190	Zfp40	zinc finger protein 40	681.049	748.543	0.136888	0.559515
ENSMUSG00000002625	GSMG0017371	Akap8l	A kinase (PRKA) anchor protein 8-like	4120.59	7679.77	0.898291	5.34562e-09
ENSMUSG00000002635	GSMG0035784	Pdcd2l	programmed cell death 2-like	630.296	547.552	-0.201364	0.421097
ENSMUSG00000002658	GSMG0017712	Gtf2f1	general transcription factor IIF, polypeptide 1	957.279	863.743	-0.146971	0.528834
ENSMUSG00000002660	GSMG0016832	Clpp	caseinolytic mitochondrial matrix peptidase proteolytic subunit	1503.49	1387.69	-0.11545	0.597097
ENSMUSG00000002661	GSMG0016833	Alkbh7	alkB homolog 7	340.333	334.259	-0.0257596	0.943568
ENSMUSG00000002679	GSMG0009080	Med6	mediator complex subunit 6	427.831	365.345	-0.228415	0.361534
ENSMUSG00000002688	GSMG0008844	Prkd1	protein kinase D1	286.573	283.173	-0.0149442	0.971562
ENSMUSG00000002699	GSMG0005028	Lcp2	lymphocyte cytosolic protein 2	287.999	186.05	-0.623737	0.0384873
ENSMUSG00000002718	GSMG0022186	Cse1l	chromosome segregation 1-like (S. cerevisiae)	878.687	664.372	-0.402704	0.046895
ENSMUSG00000002728	GSMG0021914	Naa20	N(alpha)-acetyltransferase 20, NatB catalytic subunit	1808.23	1639.55	-0.140974	0.505433
ENSMUSG00000002731	GSMG0023008	Prkra	protein kinase, interferon inducible double stranded RNA dependent activator	450.297	306.227	-0.554816	0.0414082
ENSMUSG00000002732	GSMG0023009	Fkbp7	FK506 binding protein 7	653.372	716.279	0.132408	0.680857
ENSMUSG00000002733	GSMG0021267	Plekha3	pleckstrin homology domain-containing, family A (phosphoinositide binding specific) member 3	464.649	585.472	0.333699	0.264095
ENSMUSG00000002741	GSMG0004860	Ykt6	YKT6 v-SNARE homolog (S. cerevisiae)	2555.54	2021.57	-0.338165	0.105985
ENSMUSG00000002748	GSMG0029901	Baz1b	bromodomain adjacent to zinc finger domain, 1B	349.661	315.214	-0.152368	0.610598
ENSMUSG00000002763	GSMG0016738	Pex6	peroxisomal biogenesis factor 6	1849.94	2007.37	0.118285	0.65628
ENSMUSG00000002767	GSMG0016731	Mrpl2	mitochondrial ribosomal protein L2	1194.71	956.6	-0.320363	0.085551
ENSMUSG00000002768	GSMG0016737	Mea1	male enhanced antigen 1	1699.06	1437.31	-0.240559	0.286885
ENSMUSG00000002778	GSMG0034488	Kdelr1	KDEL (Lys-Asp-Glu-Leu) endoplasmic reticulum protein retention receptor 1	880.34	886.009	0.0100461	0.975849
ENSMUSG00000002781	GSMG0034489	Tmem143	transmembrane protein 143	66.2617	80.2615	0.271341	0.595728
ENSMUSG00000002799	GSMG0009357	Jag2	jagged 2	1734.27	3365.76	0.956562	0.137502
ENSMUSG00000002803	GSMG0008597	Btbd6	BTB (POZ) domain containing 6	115.49	120.643	0.0595663	0.909447
ENSMUSG00000002804	GSMG0009358	Nudt14	nudix (nucleoside diphosphate linked moiety X)-type motif 14	1043.83	946.041	-0.14206	0.557219
ENSMUSG00000002808	GSMG0010370	Epdr1	ependymin related protein 1 (zebrafish)	962.982	1309.71	0.443205	0.00572592
ENSMUSG00000002812	GSMG0006756	Flii	flightless I actin binding protein	4950.47	5216.76	0.0758041	0.758206
ENSMUSG00000002814	GSMG0006757	Top3a	topoisomerase (DNA) III alpha	381.558	280.151	-0.442379	0.112216
ENSMUSG00000002820	GSMG0039214	Atg4d	autophagy related 4D, cysteine peptidase	601.201	780.937	0.379135	0.103461
ENSMUSG00000002825	GSMG0039220	Qtrt1	queuine tRNA-ribosyltransferase 1	572.069	481.319	-0.248162	0.277189
ENSMUSG00000002833	GSMG0016810	Hdgfrp2	hepatoma-derived growth factor, related protein 2	4250.92	4284.45	0.0114	0.967048
ENSMUSG00000002844	GSMG0015729	Adprh	ADP-ribosylarginine hydrolase	1453.69	1111.56	-0.388124	0.0272505
ENSMUSG00000002845	GSMG0014975	Tmem39a	transmembrane protein 39a	260.842	355.591	0.451047	0.0667236
ENSMUSG00000002846	GSMG0015730	Timmdc1	translocase of inner mitochondrial membrane domain containing 1	232.029	262.899	0.184005	0.562764
ENSMUSG00000002847	GSMG0015728	Pla1a	phospholipase A1 member A	274.64	496.68	0.856772	9.47138e-06
ENSMUSG00000002871	GSMG0032199	Tpra1	transmembrane protein, adipocyte asscociated 1	1980.96	2250.16	0.184158	0.396367
ENSMUSG00000002881	GSMG0001564	Nab1	Ngfi-A binding protein 1	570.878	699.058	0.291574	0.22877
ENSMUSG00000002885	GSMG0038664	Adgre5	adhesion G protein-coupled receptor E5	3233.56	4596.31	0.507587	0.000754346
ENSMUSG00000002897	GSMG0032408	Il17ra	interleukin 17 receptor A	88.466	129.619	0.550687	0.124749
ENSMUSG00000002900	GSMG0007935	Lamb1	laminin B1	9291.33	4903.9	-0.921997	3.64334e-11
ENSMUSG00000002908	GSMG0038567	Kcnn1	potassium intermediate/small conductance calcium-activated channel, subfamily N, member 1	206.613	113.454	-0.863216	0.00369805
ENSMUSG00000002910	GSMG0038566	Arrdc2	arrestin domain containing 2	342.85	373.25	0.124834	0.695548
ENSMUSG00000002948,ENSMUSG00000089736	GSMG0036960	Map2k7 // Tgfbr3l	mitogen-activated protein kinase kinase 7 // transforming growth factor, beta receptor III-like	885.255	932.064	0.0736903	0.815009
ENSMUSG00000002949	GSMG0038047	Timm44	translocase of inner mitochondrial membrane 44	1967.59	2435.43	0.307338	0.0888094
ENSMUSG00000002957	GSMG0035349	Ap2a2	adaptor-related protein complex 2, alpha 2 subunit	4451.27	3889.49	-0.194635	0.286586
ENSMUSG00000002963	GSMG0034447	Pnkp	polynucleotide kinase 3'- phosphatase	1210.46	1502.6	0.312302	0.0725608
ENSMUSG00000002968	GSMG0035877	Med25	mediator complex subunit 25	2761.39	2331.56	-0.244415	0.210771
ENSMUSG00000002981	GSMG0035590	Clptm1	cleft lip and palate associated transmembrane protein 1	6353.05	5898.66	-0.106947	0.631414
ENSMUSG00000002983	GSMG0035589	Relb	avian reticuloendotheliosis viral (v-rel) oncogene related B	417.435	352.347	-0.242036	0.407999
ENSMUSG00000002984	GSMG0035596	Tomm40	translocase of outer mitochondrial membrane 40 homolog (yeast)	1726.06	1500.25	-0.202285	0.306764
ENSMUSG00000002985	GSMG0035595	Apoe	apolipoprotein E	20178.7	38317.5	0.925213	1.73107e-08
ENSMUSG00000002996	GSMG0008785	Hbp1	high mobility group box transcription factor 1	2728.09	3339.87	0.292033	0.071229
ENSMUSG00000002997	GSMG0008786	Prkar2b	protein kinase, cAMP dependent regulatory, type II beta	595.25	335.703	-0.827514	3.5054e-06
ENSMUSG00000003033	GSMG0037445	Ap1m1	adaptor-related protein complex AP-1, mu subunit 1	2868.16	2160.14	-0.408286	0.0209149
ENSMUSG00000003037	GSMG0037442	Rab8a	RAB8A, member RAS oncogene family	3242.79	2718.64	-0.25403	0.206048
ENSMUSG00000003039	GSMG0037444	Fam32a	family with sequence similarity 32, member A	3171.66	3102.64	-0.0315333	0.910541
ENSMUSG00000003062	GSMG0010367	Stard3nl	STARD3 N-terminal like	1308.68	1540.98	0.235379	0.292621
ENSMUSG00000003068	GSMG0003247	Stk11	serine/threonine kinase 11	526.823	455.627	-0.208432	0.474799
ENSMUSG00000003070	GSMG0003254	Efna2	ephrin A2	296.723	158.59	-0.903003	0.000355922
ENSMUSG00000003072	GSMG0003250	Atp5d	ATP synthase, H+ transporting, mitochondrial F1 complex, delta subunit	5017.26	4810.51	-0.0609542	0.820139
ENSMUSG00000003099	GSMG0035553	Ppp5c	protein phosphatase 5, catalytic subunit	2657.11	2566.16	-0.0500906	0.844998
ENSMUSG00000003119	GSMG0005874	Cdk12	cyclin-dependent kinase 12	520.745	496.15	-0.0685786	0.820931
ENSMUSG00000003123	GSMG0035644	Lipe	lipase, hormone sensitive	551.797	613.384	0.152937	0.546087
ENSMUSG00000003131	GSMG0040698	Pafah1b2	platelet-activating factor acetylhydrolase, isoform 1b, subunit 2	5369.52	4874.9	-0.139258	0.523577
ENSMUSG00000003134	GSMG0001517	Tbc1d8	TBC1 domain family, member 8	575.604	543.956	-0.0823048	0.818075
ENSMUSG00000003135	GSMG0000172	Cnot11	CCR4-NOT transcription complex, subunit 11	440.567	359.155	-0.293672	0.193545
ENSMUSG00000003153	GSMG0033645	Slc2a3	solute carrier family 2 (facilitated glucose transporter), member 3	1021.98	1570.15	0.619615	0.000436057
ENSMUSG00000003154	GSMG0032444	Foxj2	forkhead box J2	403.873	494.375	0.290223	0.339354
ENSMUSG00000003161	GSMG0028799	Sri	sorcin	2939.26	2962.15	0.011114	0.972161
ENSMUSG00000003166,ENSMUSG00000090236	GSMG0015510	Car15 // Dgcr2	carbonic anhydrase 15 // DiGeorge syndrome critical region gene 2	1898.53	1636.3	-0.213739	0.394669
ENSMUSG00000003184	GSMG0034454	Irf3	interferon regulatory factor 3	977.616	1117.26	0.19302	0.331883
ENSMUSG00000003190	GSMG0035883	Bcl2l12	BCL2-like 12 (proline rich)	230.025	179.453	-0.363876	0.224357
ENSMUSG00000003198	GSMG0016803	Zfp959	zinc finger protein 959	348.456	390.688	0.16802	0.581934
ENSMUSG00000003199	GSMG0016808	Mpnd	MPN domain containing	2143.5	2452.18	0.194521	0.315398
ENSMUSG00000003200	GSMG0017681	Sh3gl1	SH3-domain GRB2-like 1	2381.31	2513.82	0.0782206	0.737386
ENSMUSG00000003208	GSMG0016805	Ccdc94	coiled-coil domain containing 94	435.999	342.294	-0.347255	0.109275
ENSMUSG00000003226	GSMG0003022	Ranbp2	RAN binding protein 2	1811.01	1754.49	-0.0457868	0.857115
ENSMUSG00000003228	GSMG0019899	Grk5	G protein-coupled receptor kinase 5	488.015	282.737	-0.783456	0.000141845
ENSMUSG00000003233	GSMG0014773	Dvl3	dishevelled segment polarity protein 3	1135.52	1028.35	-0.143396	0.619934
ENSMUSG00000003234	GSMG0014775	Abcf3	ATP-binding cassette, sub-family F (GCN20), member 3	2314.48	2528.88	0.127619	0.542457
ENSMUSG00000003235	GSMG0014772	Eif2b5	eukaryotic translation initiation factor 2B, subunit 5 epsilon	2323.74	2143.21	-0.116525	0.578917
ENSMUSG00000003269	GSMG0035922	Cyth2	cytohesin 2	1959.73	1889.02	-0.0530541	0.842558
ENSMUSG00000003273	GSMG0034481	Car11	carbonic anhydrase 11	2002.8	2102.2	0.0691613	0.812875
ENSMUSG00000003279	GSMG0016887	Dlgap1	discs, large (Drosophila) homolog-associated protein 1	1660.2	2495.48	0.588048	6.27886e-05
ENSMUSG00000003299	GSMG0039206	Mrpl4	mitochondrial ribosomal protein L4	2242.81	2297.75	0.0350111	0.892572
ENSMUSG00000003308	GSMG0040437	Keap1	kelch-like ECH-associated protein 1	1066.06	1046.89	-0.0270739	0.933404
ENSMUSG00000003316	GSMG0038923	Glg1	golgi apparatus protein 1	2174.88	2074.29	-0.0673655	0.820895
ENSMUSG00000003344	GSMG0004342	Btbd2	BTB (POZ) domain containing 2	491.467	499.872	0.0213577	0.961777
ENSMUSG00000003345	GSMG0003272	Csnk1g2	casein kinase 1, gamma 2	4011.66	4315.32	0.105176	0.7326
ENSMUSG00000003346	GSMG0004341	Abhd17a	abhydrolase domain containing 17A	5572.03	4265.33	-0.385469	0.00889742
ENSMUSG00000003348	GSMG0043685	Mob3a	MOB kinase activator 3A	360.224	307.139	-0.228102	0.378002
ENSMUSG00000003355	GSMG0014475	Fkbp11	FK506 binding protein 11	93.2284	98.6007	0.0781726	0.904589
ENSMUSG00000003363	GSMG0035674	Pld3	phospholipase D family, member 3	3597.79	4655.04	0.371861	0.0435224
ENSMUSG00000003378	GSMG0035632	Grik5	glutamate receptor, ionotropic, kainate 5 (gamma 2)	1531.45	2133.12	0.477939	0.0302878
ENSMUSG00000003380	GSMG0035630	Rabac1	Rab acceptor 1 (prenylated)	3845.81	4401.47	0.19467	0.299334
ENSMUSG00000003382	GSMG0024494	Etv3	ets variant 3	1050.42	1239.48	0.237605	0.349293
ENSMUSG00000003402	GSMG0039232	Prkcsh	protein kinase C substrate 80K-H	2482.21	2284.29	-0.12006	0.576572
ENSMUSG00000003420	GSMG0035891	Fcgrt	Fc receptor, IgG, alpha chain transporter	6002.69	9927.75	0.725968	1.8496e-06
ENSMUSG00000003421	GSMG0034456	Nosip	nitric oxide synthase interacting protein	1080.74	1137.81	0.0740918	0.777519
ENSMUSG00000003423	GSMG0034458	Pih1d1	PIH1 domain containing 1	924.393	603.426	-0.614603	0.000636902
ENSMUSG00000003429	GSMG0035892	Rps11	ribosomal protein S11	4014.66	2517.88	-0.67349	3.65643e-05
ENSMUSG00000003435	GSMG0035693	Supt5	suppressor of Ty 5	4919.66	4584.44	-0.101909	0.690443
ENSMUSG00000003437	GSMG0034246	Paf1	Paf1, RNA polymerase II complex component	1736.3	1982.77	0.19229	0.359565
ENSMUSG00000003438	GSMG0035692	Timm50	translocase of inner mitochondrial membrane 50	990.981	794.063	-0.318697	0.0999966
ENSMUSG00000003444	GSMG0035696	Med29	mediator complex subunit 29	447.148	356.072	-0.32855	0.13765
ENSMUSG00000003452	GSMG0032681	Bicd1	bicaudal D homolog 1 (Drosophila)	1205.13	1490.88	0.308166	0.154159
ENSMUSG00000003458	GSMG0002466	Ncstn	nicastrin	4626.35	4483.65	-0.0449513	0.867087
ENSMUSG00000003464	GSMG0001060	Pex19	peroxisomal biogenesis factor 19	551.368	592.833	0.105251	0.699354
ENSMUSG00000003500	GSMG0032802	Impdh1	inosine 5'-phosphate dehydrogenase 1	3498.69	4019.53	0.200345	0.322583
ENSMUSG00000003518	GSMG0007431	Dusp3	dual specificity phosphatase 3 (vaccinia virus phosphatase VH1-related)	3851.59	4592.49	0.253512	0.342014
ENSMUSG00000003526	GSMG0015514	Prodh	proline dehydrogenase	285.157	544.193	0.933199	6.96402e-05
ENSMUSG00000003527	GSMG0015511	Dgcr14	DiGeorge syndrome critical region gene 14	1434.85	1268.44	-0.177604	0.365025
ENSMUSG00000003528	GSMG0015513	Slc25a1	solute carrier family 25 (mitochondrial carrier, citrate transporter), member 1	1391.29	1414.72	0.0248648	0.932863
ENSMUSG00000003531	GSMG0014746	Dgcr6	DiGeorge syndrome critical region gene 6	1696.19	1627.33	-0.0595978	0.815249
ENSMUSG00000003534	GSMG0017473	Ddr1	discoidin domain receptor family, member 1	675.88	810.986	0.262716	0.462257
ENSMUSG00000003546	GSMG0017604	Klc4	kinesin light chain 4	1003.19	1212.94	0.274846	0.23681
ENSMUSG00000003549	GSMG0034111	Ercc1	excision repair cross-complementing rodent repair deficiency, complementation group 1	668.584	556.615	-0.262253	0.274387
ENSMUSG00000003559	GSMG0019774	As3mt	arsenic (+3 oxidation state) methyltransferase	703.349	745.148	0.0844313	0.812553
ENSMUSG00000003573	GSMG0037378	Homer3	homer scaffolding protein 3	721.081	546.234	-0.403556	0.0597405
ENSMUSG00000003575	GSMG0038550	Crtc1	CREB regulated transcription coactivator 1	570.15	534.859	-0.0918789	0.794291
ENSMUSG00000003581	GSMG0004832	Rnf215	ring finger protein 215	1732.75	1951.65	0.172134	0.405757
ENSMUSG00000003585	GSMG0006268	Sec14l2	SEC14-like lipid binding 2	72.2991	109.163	0.592257	0.132492
ENSMUSG00000003604	GSMG0021564	Aven	apoptosis, caspase activation inhibitor	83.0866	107.919	0.370881	0.363879
ENSMUSG00000003623	GSMG0030170	Crot	carnitine O-octanoyltransferase	1095.2	1231.29	0.169057	0.449838
ENSMUSG00000003644	GSMG0028477	Rps6ka1	ribosomal protein S6 kinase polypeptide 1	1005.4	718.128	-0.485221	0.00916183
ENSMUSG00000003657	GSMG0038910	Calb2	calbindin 2	83.8954	67.2814	-0.322923	0.532967
ENSMUSG00000003660	GSMG0021738	Snrnp200	small nuclear ribonucleoprotein 200 (U5)	1111.96	1015.19	-0.130312	0.644029
ENSMUSG00000003662	GSMG0023488	Ciao1	cytosolic iron-sulfur protein assembly 1	543.849	598.671	0.140316	0.603162
ENSMUSG00000003680	GSMG0043807	Taf6l	TATA-box binding protein associated factor 6 like	272.628	201.333	-0.431236	0.114731
ENSMUSG00000003721	GSMG0002008	Insig2	insulin induced gene 2	418.647	533.389	0.3477	0.13022
ENSMUSG00000003731	GSMG0028410	Kpna6	karyopherin (importin) alpha 6	781.923	712.897	-0.135239	0.621839
ENSMUSG00000003746	GSMG0004102	Man1a	mannosidase 1, alpha	575.161	655.823	0.186875	0.46976
ENSMUSG00000003752	GSMG0035667	Itpkc	inositol 1,4,5-trisphosphate 3-kinase C	58.7476	66.3577	0.169081	0.774015
ENSMUSG00000003762	GSMG0034206	Adck4	aarF domain containing kinase 4	364.857	461.763	0.341418	0.163463
ENSMUSG00000003778	GSMG0018826	Brd8	bromodomain containing 8	976.894	768.71	-0.344751	0.0546836
ENSMUSG00000003808	GSMG0037545	Farsa	phenylalanyl-tRNA synthetase, alpha subunit	1101.94	932.822	-0.239031	0.237917
ENSMUSG00000003809	GSMG0038692	Gcdh	glutaryl-Coenzyme A dehydrogenase	452.629	637.716	0.496878	0.018854
ENSMUSG00000003810	GSMG0028231	Mast2	microtubule associated serine/threonine kinase 2	1447.65	1095.67	-0.401617	0.139105
ENSMUSG00000003812	GSMG0037549	Dnase2a // Gm38426	deoxyribonuclease II alpha // predicted gene, 38426	86.3494	116.128	0.424885	0.283585
ENSMUSG00000003813	GSMG0038690	Rad23a	RAD23 homolog A, nucleotide excision repair protein	1072.61	987.952	-0.118862	0.623752
ENSMUSG00000003814	GSMG0038691	Calr	calreticulin	19123.8	14963.4	-0.353866	0.0254695
ENSMUSG00000003847	GSMG0037777	Nfat5	nuclear factor of activated T cells 5	391.722	477.237	0.28754	0.243382
ENSMUSG00000003848	GSMG0038887	Nob1	NIN1/RPN12 binding protein 1 homolog	438.685	326.976	-0.425465	0.0523458
ENSMUSG00000003849	GSMG0038886	Nqo1	NAD(P)H dehydrogenase, quinone 1	53.4447	62.9498	0.242207	0.706507
ENSMUSG00000003863	GSMG0035902	Ppfia3	protein tyrosine phosphatase, receptor type, f polypeptide (PTPRF), interacting protein (liprin), alpha 3	1281.7	1384.22	0.110697	0.74744
ENSMUSG00000003865	GSMG0034470	Gys1	glycogen synthase 1, muscle	371.784	318.784	-0.218316	0.488157
ENSMUSG00000003868	GSMG0035906	Ruvbl2	RuvB-like protein 2	1844.17	1328.31	-0.472168	0.00916183
ENSMUSG00000003873	GSMG0035908	Bax	BCL2-associated X protein	2740.47	2330.91	-0.233913	0.191451
ENSMUSG00000003923	GSMG0004235	Tfam	transcription factor A, mitochondrial	954.325	742.125	-0.363034	0.0550512
ENSMUSG00000003929	GSMG0017397	Zfp81	zinc finger protein 81	229.916	243.732	0.0889411	0.835053
ENSMUSG00000003948	GSMG0005758	Mmd	monocyte to macrophage differentiation-associated	3347.64	2639.51	-0.343258	0.0801987
ENSMUSG00000003949	GSMG0007227	Hlf	hepatic leukemia factor	120.536	127.543	0.080855	0.872097
ENSMUSG00000003955	GSMG0015706	Fam162a	family with sequence similarity 162, member A	930.041	957.795	0.0426173	0.896924
ENSMUSG00000003970	GSMG0013333	Rpl8	ribosomal protein L8	3628.7	2885.21	-0.330722	0.0564496
ENSMUSG00000003974	GSMG0030175	Grm3	glutamate receptor, metabotropic 3	1247.27	855.478	-0.54212	0.00267745
ENSMUSG00000003992	GSMG0010030	Ssbp2	single-stranded DNA binding protein 2	1261.45	706.953	-0.833101	7.00912e-07
ENSMUSG00000004018	GSMG0004970	Fancl	Fanconi anemia, complementation group L	331.426	233.178	-0.504043	0.0412496
ENSMUSG00000004031	GSMG0002290	Brinp2	bone morphogenic protein/retinoic acid inducible neural-specific 2	426.951	487.635	0.190997	0.578586
ENSMUSG00000004032	GSMG0024809	Gstm5	glutathione S-transferase, mu 5	2582.81	2554.55	-0.0157582	0.954285
ENSMUSG00000004035	GSMG0025911	Gstm7	glutathione S-transferase, mu 7	1226.99	1336.83	0.123885	0.639279
ENSMUSG00000004040	GSMG0007408	Stat3	signal transducer and activator of transcription 3	3848.14	3486.47	-0.142515	0.472025
ENSMUSG00000004044	GSMG0007409	Ptrf	polymerase I and transcript release factor	6220.34	7123.02	0.195154	0.465346
ENSMUSG00000004054	GSMG0019313	Map3k11	mitogen-activated protein kinase kinase kinase 11	3393.6	3447.28	0.0224261	0.939767
ENSMUSG00000004056	GSMG0034218	Akt2	thymoma viral proto-oncogene 2	907.574	1036.7	0.193149	0.424272
ENSMUSG00000004069	GSMG0014602	Dnaja3	DnaJ heat shock protein family (Hsp40) member A3	1700.71	1711.87	0.00963804	0.973529
ENSMUSG00000004070	GSMG0014603	Hmox2	heme oxygenase 2	68.0098	73.7556	0.123766	0.835537
ENSMUSG00000004071	GSMG0015391	Cdip1	cell death inducing Trp53 target 1	988.738	978.449	-0.0139724	0.964959
ENSMUSG00000004085	GSMG0021217	Zak	sterile alpha motif and leucine zipper containing kinase AZK	687.083	903.794	0.39499	0.0381267
ENSMUSG00000004096	GSMG0039159	Cwc15	CWC15 spliceosome-associated protein	1275.9	1107.78	-0.203348	0.448241
ENSMUSG00000004099	GSMG0040427	Dnmt1	DNA methyltransferase (cytosine-5) 1	4761.67	2806.62	-0.762495	5.40207e-08
ENSMUSG00000004100	GSMG0039204	Ppan	peter pan homolog (Drosophila)	915.8	664.707	-0.462777	0.00872289
ENSMUSG00000004105	GSMG0020937	Angptl2	angiopoietin-like 2	1203.6	1321.37	0.135724	0.654925
ENSMUSG00000004110	GSMG0002248	Cacna1e	calcium channel, voltage-dependent, R type, alpha 1E subunit	1102.39	1212.14	0.137587	0.634378
ENSMUSG00000004113	GSMG0022506	Cacna1b	calcium channel, voltage-dependent, N type, alpha 1B subunit	184.568	130.591	-0.503457	0.135331
ENSMUSG00000004127	GSMG0025004	Trmt10a	tRNA methyltransferase 10A	148.56	106.511	-0.480756	0.132185
ENSMUSG00000004187	GSMG0013324	Kifc2	kinesin family member C2	4907.22	8246.37	0.748946	2.90859e-05
ENSMUSG00000004207	GSMG0003044	Psap	prosaposin	8691.77	9901.69	0.188061	0.383589
ENSMUSG00000004221	GSMG0041861	Ikbkg	inhibitor of kappaB kinase gamma	380.25	455.933	0.262344	0.280086
ENSMUSG00000004233	GSMG0024716	Wars2	tryptophanyl tRNA synthetase 2 (mitochondrial)	67.8111	63.7781	-0.0802989	0.904589
ENSMUSG00000004263,ENSMUSG00000072772	GSMG0033662	Grcc10 // Atn1	gene rich cluster, C10 gene // atrophin 1	4104.22	3259.81	-0.332772	0.0744095
ENSMUSG00000004264	GSMG0032465	Phb2	prohibitin 2	2904.4	2067.71	-0.490064	0.00439522
ENSMUSG00000004266	GSMG0033661	Ptpn6	protein tyrosine phosphatase, non-receptor type 6	200.719	222.361	0.152326	0.690714
ENSMUSG00000004267	GSMG0033663	Eno2	enolase 2, gamma neuronal	1500.8	2639.1	0.814714	9.62439e-07
ENSMUSG00000004268	GSMG0033660	Emg1	EMG1 N1-specific pseudouridine methyltransferase	1443.59	1116.23	-0.370457	0.0402749
ENSMUSG00000004270	GSMG0032463	Lpcat3	lysophosphatidylcholine acyltransferase 3	3083.76	3081.51	-0.000834797	0.997976
ENSMUSG00000004285	GSMG0031596	Atp6v1f	ATPase, H+ transporting, lysosomal V1 subunit F	1914.34	1975.97	0.0457104	0.861145
ENSMUSG00000004317	GSMG0042315	Clcn5	chloride channel, voltage-sensitive 5	276.233	159.58	-0.788266	0.00105642
ENSMUSG00000004319	GSMG0038473	Clcn3	chloride channel, voltage-sensitive 3	4744.07	4268.97	-0.152174	0.439037
ENSMUSG00000004356	GSMG0050834	Utp20	UTP20 small subunit processome component	289.259	186.523	-0.63972	0.00937744
ENSMUSG00000004360	GSMG0002846	9330159F19Rik	RIKEN cDNA 9330159F19 gene	448.421	518.223	0.208571	0.403019
ENSMUSG00000004364	GSMG0001803	Cul3	cullin 3	1162.26	1781.9	0.615676	0.0163671
ENSMUSG00000004366	GSMG0015581	Sst	somatostatin	1284.46	1548.11	0.268834	0.359047
ENSMUSG00000004383	GSMG0038606	Large	like-glycosyltransferase	569.03	500.917	-0.184392	0.574152
ENSMUSG00000004393	GSMG0006317	Ddx56	DEAD (Asp-Glu-Ala-Asp) box polypeptide 56	1655.17	1315.64	-0.331161	0.0434021
ENSMUSG00000004394	GSMG0006318	Tmed4	transmembrane emp24 protein transport domain containing 4	3385.01	3619.67	0.0964892	0.705855
ENSMUSG00000004415	GSMG0031225	Col26a1	collagen, type XXVI, alpha 1	340.601	360.75	0.0836768	0.824301
ENSMUSG00000004446	GSMG0033630	Bid	BH3 interacting domain death agonist	314.762	179.601	-0.804823	0.000550256
ENSMUSG00000004451	GSMG0001987	Ralb	v-ral simian leukemia viral oncogene B	2077.48	1341.83	-0.63044	7.2322e-05
ENSMUSG00000004460	GSMG0014796	Dnajb11	DnaJ heat shock protein family (Hsp40) member B11	2683.36	2272.67	-0.239313	0.236556
ENSMUSG00000004462	GSMG0015573	Tbccd1	TBCC domain containing 1	289.397	278.007	-0.0544459	0.891934
ENSMUSG00000004500	GSMG0034030	Zfp324	zinc finger protein 324	494.32	650.675	0.39393	0.134824
ENSMUSG00000004508	GSMG0034834	Gab2	growth factor receptor bound protein 2-associated protein 2	400.108	423.849	0.0854143	0.843759
ENSMUSG00000004530	GSMG0030943	Coro1c	coronin, actin binding protein 1C	2038.91	1297.77	-0.651342	6.69062e-06
ENSMUSG00000004535	GSMG0031900	Tax1bp1	Tax1 (human T cell leukemia virus type I) binding protein 1	4761.19	4710.11	-0.0155018	0.962225
ENSMUSG00000004558	GSMG0012369	Ndrg2	N-myc downstream regulated gene 2	4368.41	5567.79	0.350353	0.0688078
ENSMUSG00000004561	GSMG0011537	Mettl17	methyltransferase like 17	1814.27	1798.26	-0.01247	0.965367
ENSMUSG00000004562	GSMG0011539	Arhgef40	Rho guanine nucleotide exchange factor (GEF) 40	1700.69	1570.87	-0.11502	0.795055
ENSMUSG00000004565	GSMG0036946	Pnpla6	patatin-like phospholipase domain containing 6	6338.06	6706.26	0.081462	0.769063
ENSMUSG00000004567	GSMG0036945	Mcoln1	mucolipin 1	3010.16	3059.74	0.0238161	0.931553
ENSMUSG00000004568	GSMG0036940	Arhgef18	rho/rac guanine nucleotide exchange factor (GEF) 18	652.776	690.645	0.0799401	0.82486
ENSMUSG00000004591	GSMG0026139	Pkn2	protein kinase N2	985.358	1008.66	0.0334947	0.916622
ENSMUSG00000004610	GSMG0034390	Etfb	electron transferring flavoprotein, beta polypeptide	2044.48	2078.16	0.0236523	0.939631
ENSMUSG00000004626	GSMG0036951	Stxbp2	syntaxin binding protein 2	2432.36	2217.17	-0.132987	0.603109
ENSMUSG00000004631	GSMG0032695	Sgce	sarcoglycan, epsilon	1087.8	730.999	-0.572221	0.00264248
ENSMUSG00000004633	GSMG0031911	Chn2	chimerin 2	377.72	535.573	0.50528	0.0274632
ENSMUSG00000004637	GSMG0037844	Wwox	WW domain-containing oxidoreductase	216.078	154.606	-0.478685	0.0896407
ENSMUSG00000004642	GSMG0030359	Slbp	stem-loop binding protein	946.821	680.866	-0.47637	0.0763203
ENSMUSG00000004661	GSMG0040832	Arid3b	AT rich interactive domain 3B (BRIGHT-like)	288.7	283.739	-0.0233654	0.953168
ENSMUSG00000004665	GSMG0003243	Cnn2	calponin 2	4621.44	5573.74	0.270442	0.139727
ENSMUSG00000004667	GSMG0004325	Polr2e	polymerase (RNA) II (DNA directed) polypeptide E	1901.62	1858.93	-0.0323703	0.908538
ENSMUSG00000004677	GSMG0037412	Myo9b	myosin IXb	708.395	581.194	-0.28647	0.280612
ENSMUSG00000004698	GSMG0008798	Hdac9	histone deacetylase 9	499.438	463.659	-0.105043	0.717959
ENSMUSG00000004768	GSMG0000116	Rab23	RAB23, member RAS oncogene family	202.517	170.595	-0.251176	0.431961
ENSMUSG00000004771	GSMG0040918	Rab11a	RAB11A, member RAS oncogene family	6722.36	6766.37	0.00944327	0.974257
ENSMUSG00000004788	GSMG0008331	Eif2b2	eukaryotic translation initiation factor 2B, subunit 2 beta	1037.37	843.808	-0.297018	0.116585
ENSMUSG00000004789	GSMG0008330	Dlst	dihydrolipoamide S-succinyltransferase (E2 component of 2-oxo-glutarate complex)	1589.92	1503.97	-0.0791344	0.766042
ENSMUSG00000004791	GSMG0009128	Pgf	placental growth factor	284.652	375.926	0.402946	0.168468
ENSMUSG00000004798	GSMG0006777	Ulk2	unc-51 like kinase 2	2426.53	2264.44	-0.0995302	0.71036
ENSMUSG00000004815	GSMG0030886	Dgkq	diacylglycerol kinase, theta	472.969	478.132	0.0159598	0.974641
ENSMUSG00000004837	GSMG0005310	Grap	GRB2-related adaptor protein	6207.26	7222.24	0.218538	0.252019
ENSMUSG00000004843	GSMG0015900	Chmp2b	charged multivesicular body protein 2B	2317.9	2057.33	-0.172235	0.47942
ENSMUSG00000004846	GSMG0029927	Plod3	procollagen-lysine, 2-oxoglutarate 5-dioxygenase 3	2307.45	2192.72	-0.0729316	0.777003
ENSMUSG00000004849	GSMG0031227	Ap1s1	adaptor protein complex AP-1, sigma 1	2987	2095.21	-0.5117	0.00172517
ENSMUSG00000004865	GSMG0017314	Srpk1	serine/arginine-rich protein specific kinase 1	802.549	710.053	-0.175827	0.451103
ENSMUSG00000004880	GSMG0002572	Lbr	lamin B receptor	1770.02	1378.17	-0.360338	0.0891871
ENSMUSG00000004885	GSMG0024504	Crabp2	cellular retinoic acid binding protein II	137.559	102.42	-0.422164	0.236667
ENSMUSG00000004891	GSMG0024505	Nes	nestin	8645.15	9490.88	0.134551	0.607835
ENSMUSG00000004892	GSMG0025609	Bcan	brevican	2157.87	2709.51	0.328668	0.20444
ENSMUSG00000004895	GSMG0025607	Prcc	papillary renal cell carcinoma (translocation-associated)	147.91	106.26	-0.471339	0.181667
ENSMUSG00000004896	GSMG0025608	Rrnad1	ribosomal RNA adenine dimethylase domain containing 1	216.34	252.282	0.22169	0.47433
ENSMUSG00000004897	GSMG0024501	Hdgf	hepatoma-derived growth factor	1706.65	1418.25	-0.266756	0.172298
ENSMUSG00000004902	GSMG0032414	Slc25a18	solute carrier family 25 (mitochondrial carrier), member 18	313.863	222.277	-0.493972	0.0336673
ENSMUSG00000004929	GSMG0003286	Thop1	thimet oligopeptidase 1	1197.01	965.44	-0.310316	0.117136
ENSMUSG00000004931	GSMG0003296	Apba3	amyloid beta (A4) precursor protein-binding, family A, member 3	1385.77	1861.38	0.426444	0.0110253
ENSMUSG00000004933	GSMG0003295	Matk	megakaryocyte-associated tyrosine kinase	6429.52	9153.46	0.50969	0.00263908
ENSMUSG00000004934	GSMG0004357	Pias4	protein inhibitor of activated STAT 4	515.388	531.219	0.0449801	0.894674
ENSMUSG00000004936	GSMG0040913	Map2k1	mitogen-activated protein kinase kinase 1	1457.94	1367.48	-0.0921239	0.73241
ENSMUSG00000004937	GSMG0004355	Sgta	small glutamine-rich tetratricopeptide repeat (TPR)-containing, alpha	2251.42	2024.86	-0.152717	0.512926
ENSMUSG00000004945	GSMG0017067	Tmem242	transmembrane protein 242	685.995	686.917	0.00285424	0.994933
ENSMUSG00000004947	GSMG0029914	Dtx2	deltex 2, E3 ubiquitin ligase	402.816	316.362	-0.350225	0.134179
ENSMUSG00000004952	GSMG0029917	Rasa4	RAS p21 protein activator 4	526.936	286.703	-0.881366	9.1472e-06
ENSMUSG00000004961	GSMG0035438	Syt5	synaptotagmin V	2304.01	1264.9	-0.865037	6.61274e-08
ENSMUSG00000004980	GSMG0033016	Hnrnpa2b1	heterogeneous nuclear ribonucleoprotein A2/B1	13718.7	10346.3	-0.407026	0.0185763
ENSMUSG00000004994	GSMG0038681	Ccdc130	coiled-coil domain containing 130	267.067	311.394	0.224399	0.423494
ENSMUSG00000004996	GSMG0038680	Mri1	methylthioribose-1-phosphate isomerase 1	436.221	330.075	-0.402533	0.0537044
ENSMUSG00000005034	GSMG0026171	Prkacb	protein kinase, cAMP dependent, catalytic, beta	1147.26	1096.04	-0.0659385	0.807068
ENSMUSG00000005043	GSMG0007713	Sgsh	N-sulfoglucosamine sulfohydrolase (sulfamidase)	137.958	134.25	-0.0376302	0.947816
ENSMUSG00000005045	GSMG0027442	Chd5	chromodomain helicase DNA binding protein 5	635.193	554.162	-0.199216	0.561169
ENSMUSG00000005054	GSMG0003209	Cstb	cystatin B	1708.14	1643.48	-0.056222	0.864885
ENSMUSG00000005057	GSMG0031215	Sh2b2	SH2B adaptor protein 2	214.874	120.702	-0.831409	0.0058693
ENSMUSG00000005069	GSMG0033656	Pex5	peroxisomal biogenesis factor 5	1034.37	1048.8	0.0197749	0.946112
ENSMUSG00000005078	GSMG0008160	Jkamp	JNK1/MAPK8-associated membrane protein	1167.87	1203.62	0.0441824	0.886462
ENSMUSG00000005102	GSMG0021602	Eif2ak4	eukaryotic translation initiation factor 2 alpha kinase 4	1987.61	1870.89	-0.0875561	0.712192
ENSMUSG00000005103	GSMG0030411	Wdr1	WD repeat domain 1	8094.67	7485.44	-0.112678	0.628725
ENSMUSG00000005142	GSMG0037558	Man2b1	mannosidase 2, alpha B1	1763.42	1551.83	-0.183912	0.447012
ENSMUSG00000005148	GSMG0011878	Klf5	Kruppel-like factor 5	223.276	194.213	-0.19746	0.558362
ENSMUSG00000005150	GSMG0038701	Wdr83	WD repeat domain containing 83	666.903	728.006	0.128126	0.629979
ENSMUSG00000005161	GSMG0037551	Prdx2	peroxiredoxin 2	3835.82	2443.61	-0.650019	0.000162413
ENSMUSG00000005198	GSMG0006879	Polr2a	polymerase (RNA) II (DNA directed) polypeptide A	1105.24	1055.83	-0.066946	0.887597
ENSMUSG00000005204	GSMG0006877	Senp3	SUMO/sentrin specific peptidase 3	656.955	512.816	-0.35728	0.142312
ENSMUSG00000005225	GSMG0031917	Plekha8	pleckstrin homology domain containing, family A (phosphoinositide binding specific) member 8	295.178	232.08	-0.345649	0.221805
ENSMUSG00000005262	GSMG0014760	Ufd1l	ubiquitin fusion degradation 1 like	1530.72	1260.76	-0.279531	0.121694
ENSMUSG00000005267	GSMG0006795	Zfp287	zinc finger protein 287	585.821	411.241	-0.506605	0.0432692
ENSMUSG00000005299	GSMG0030358	Letm1	leucine zipper-EF-hand containing transmembrane protein 1	1779.03	1531.92	-0.215375	0.277687
ENSMUSG00000005312	GSMG0010730	Ubqln1	ubiquilin 1	2534.08	2101.01	-0.270212	0.121333
ENSMUSG00000005338	GSMG0002484	Cadm3	cell adhesion molecule 3	400.225	284.022	-0.490919	0.0422397
ENSMUSG00000005354	GSMG0014205	Txn2	thioredoxin 2	2480.41	2500.82	0.0121645	0.96651
ENSMUSG00000005360	GSMG0013758	Slc1a3	solute carrier family 1 (glial high affinity glutamate transporter), member 3	5616.58	5146.15	-0.125991	0.544349
ENSMUSG00000005362	GSMG0033500	Crbn	cereblon	901.665	1021.59	0.18077	0.412023
ENSMUSG00000005370	GSMG0017034	Msh6	mutS homolog 6	1345.53	1044.55	-0.365923	0.036151
ENSMUSG00000005371	GSMG0017959	Fbxo11	F-box protein 11	239.845	192.894	-0.313724	0.25267
ENSMUSG00000005374	GSMG0029899	Tbl2	transducin (beta)-like 2	183.565	162.805	-0.17454	0.621839
ENSMUSG00000005378	GSMG0031193	Wbscr22	Williams Beuren syndrome chromosome region 22	898.738	825.217	-0.122015	0.647601
ENSMUSG00000005397	GSMG0009442	Nid1	nidogen 1	21466.8	15129.2	-0.504729	0.00508305
ENSMUSG00000005413	GSMG0037465	Hmox1	heme oxygenase 1	661.549	666.09	0.0109914	0.975053
ENSMUSG00000005417	GSMG0005268	Mprip	myosin phosphatase Rho interacting protein	10907.9	15672	0.522769	0.0681865
ENSMUSG00000005442	GSMG0060461	Cic	capicua transcriptional repressor	601.222	424.243	-0.505381	0.0752796
ENSMUSG00000005465	GSMG0038670	Il27ra	interleukin 27 receptor, alpha	317.014	228.195	-0.473494	0.0869671
ENSMUSG00000005469	GSMG0037527	Prkaca	protein kinase, cAMP dependent, catalytic, alpha	1655.66	1292.75	-0.357838	0.0392026
ENSMUSG00000005481	GSMG0037524	Ddx39	DEAD (Asp-Glu-Ala-Asp) box polypeptide 39	3489.88	2593.51	-0.427802	0.00767499
ENSMUSG00000005483	GSMG0037521	Dnajb1	DnaJ heat shock protein family (Hsp40) member B1	841.539	818.088	-0.0413059	0.894448
ENSMUSG00000005501	GSMG0001871	Usp40	ubiquitin specific peptidase 40	561.008	485.967	-0.208856	0.397793
ENSMUSG00000005505	GSMG0021373	Kbtbd4	kelch repeat and BTB (POZ) domain containing 4	265.954	246.028	-0.114262	0.753672
ENSMUSG00000005506	GSMG0021375	Celf1	CUGBP, Elav-like family member 1	1309.62	1254.36	-0.0610943	0.838587
ENSMUSG00000005514	GSMG0029906	Por	P450 (cytochrome) oxidoreductase	2452.74	2515.38	0.036714	0.913447
ENSMUSG00000005533	GSMG0034600	Igf1r	insulin-like growth factor I receptor	5425.01	6514.56	0.263686	0.325337
ENSMUSG00000005534	GSMG0038028	Insr	insulin receptor	1774.14	2347.96	0.405219	0.0611415
ENSMUSG00000005566	GSMG0034032	Trim28	tripartite motif-containing 28	5069.08	3923.87	-0.369606	0.0512014
ENSMUSG00000005575	GSMG0035517	Ube2m	ubiquitin-conjugating enzyme E2M	950.943	1177.4	0.306917	0.374314
ENSMUSG00000005580	GSMG0015378	Adcy9	adenylate cyclase 9	96.7921	143.152	0.558933	0.205408
ENSMUSG00000005583	GSMG0009991	Mef2c	myocyte enhancer factor 2C	5494.26	2912.82	-0.914932	2.40085e-09
ENSMUSG00000005609	GSMG0035029	Ctr9	CTR9 homolog, Paf1/RNA polymerase II complex component	1499.45	1291.4	-0.215245	0.304868
ENSMUSG00000005610	GSMG0036528	Eif4g2	eukaryotic translation initiation factor 4, gamma 2	36735.1	27986.3	-0.39248	0.00659547
ENSMUSG00000005611	GSMG0036524	Mrvi1	MRV integration site 1	698.488	934.979	0.420827	0.0309279
ENSMUSG00000005615	GSMG0014888	Pcyt1a	phosphate cytidylyltransferase 1, choline, alpha isoform	544.505	554.092	0.0264281	0.941463
ENSMUSG00000005621	GSMG0034699	Zfp592	zinc finger protein 592	1044.52	997.729	-0.0665374	0.853488
ENSMUSG00000005625	GSMG0025728	Psmd4	proteasome (prosome, macropain) 26S subunit, non-ATPase, 4	3504.63	3262.78	-0.103144	0.644674
ENSMUSG00000005656	GSMG0008879	Snx6	sorting nexin 6	2398.33	2026.12	-0.243406	0.398676
ENSMUSG00000005674	GSMG0002445	Tomm40l	translocase of outer mitochondrial membrane 40 homolog-like (yeast)	169.888	188.179	0.149492	0.721326
ENSMUSG00000005677	GSMG0001038	Nr1i3	nuclear receptor subfamily 1, group I, member 3	324.726	338.253	0.0608334	0.862633
ENSMUSG00000005682	GSMG0003689	Pan2	PAN2 poly(A) specific ribonuclease subunit	1070.91	990.629	-0.111514	0.681271
ENSMUSG00000005683	GSMG0003691	Cs	citrate synthase	2665.77	2330.34	-0.19326	0.372215
ENSMUSG00000005686	GSMG0035028	Ampd3	adenosine monophosphate deaminase 3	250.39	327.506	0.384875	0.170164
ENSMUSG00000005687	GSMG0024755	Bcas2	breast carcinoma amplified sequence 2	2467.27	1882.33	-0.390799	0.0811405
ENSMUSG00000005698	GSMG0037724	Ctcf	CCCTC-binding factor	1879.77	1666.25	-0.174125	0.43214
ENSMUSG00000005699	GSMG0037730	Pard6a	par-6 family cell polarity regulator alpha	523.024	622.398	0.250192	0.284149
ENSMUSG00000005732	GSMG0015517	Ranbp1	RAN binding protein 1	4648.15	2775.19	-0.744333	0.000305719
ENSMUSG00000005774	GSMG0024639	Rfx5	regulatory factor X, 5 (influences HLA class II expression)	167.357	155.235	-0.107375	0.797344
ENSMUSG00000005779	GSMG0025721	Psmb4	proteasome (prosome, macropain) subunit, beta type 4	2284.33	1891.62	-0.271677	0.149303
ENSMUSG00000005802	GSMG0023456	Slc30a4	solute carrier family 30 (zinc transporter), member 4	226.786	255.643	0.174192	0.639625
ENSMUSG00000005803	GSMG0021703	Sqrdl	sulfide quinone reductase-like (yeast)	933.285	1044.96	0.163999	0.483335
ENSMUSG00000005804	GSMG0021702	Bloc1s6	biogenesis of lysosomal organelles complex-1, subunit 6, pallidin	1351.66	1034.44	-0.385906	0.0290365
ENSMUSG00000005813	GSMG0026116	Metap1	methionyl aminopeptidase 1	485.264	403.909	-0.264125	0.257958
ENSMUSG00000005823	GSMG0017722	Gpr108	G protein-coupled receptor 108	1213.48	1639.5	0.434679	0.00777203
ENSMUSG00000005846	GSMG0015446	Rsl1d1	ribosomal L1 domain containing 1	1570.57	1129.78	-0.475693	0.039387
ENSMUSG00000005871	GSMG0018205	Apc	adenomatosis polyposis coli	430.267	357.667	-0.26401	0.375318
ENSMUSG00000005873	GSMG0018820	Reep5	receptor accessory protein 5	5190.61	3807.69	-0.44738	0.0124675
ENSMUSG00000005881	GSMG0022048	Ergic3	ERGIC and golgi 3	4126.7	3468.01	-0.250438	0.194623
ENSMUSG00000005882	GSMG0023757	Uqcc1	ubiquinol-cytochrome c reductase complex assembly factor 1	282.242	258.597	-0.121618	0.737044
ENSMUSG00000005886	GSMG0060478	Ncoa2	nuclear receptor coactivator 2	207.133	175.362	-0.233382	0.593121
ENSMUSG00000005893	GSMG0032234	Nr2c2	nuclear receptor subfamily 2, group C, member 2	668.548	612.613	-0.124898	0.694666
ENSMUSG00000005897	GSMG0003424	Nr2c1	nuclear receptor subfamily 2, group C, member 1	325.461	331.062	0.0264827	0.943157
ENSMUSG00000005899	GSMG0014737	Smpd4	sphingomyelin phosphodiesterase 4	1101.52	1113.35	0.0153267	0.961731
ENSMUSG00000005907	GSMG0028785	Pex1	peroxisomal biogenesis factor 1	768.347	713.495	-0.106696	0.680966
ENSMUSG00000005936	GSMG0016450	Kctd20	potassium channel tetramerisation domain containing 20	1153.98	997.188	-0.210315	0.325098
ENSMUSG00000005949	GSMG0006948	Ctns	cystinosis, nephropathic	419.829	463.675	0.14451	0.59076
ENSMUSG00000005951	GSMG0005491	Shpk	sedoheptulokinase	58.6697	98.3858	0.743007	0.044563
ENSMUSG00000005958	GSMG0014786	Ephb3	Eph receptor B3	299.484	400.789	0.421178	0.144557
ENSMUSG00000005973	GSMG0023278	Rcn1	reticulocalbin 1	2050.94	1486.31	-0.464387	0.0169946
ENSMUSG00000005981	GSMG0015370	Trap1	TNF receptor-associated protein 1	751.402	651.999	-0.202141	0.476155
ENSMUSG00000005982	GSMG0014594	Naa60	N(alpha)-acetyltransferase 60, NatF catalytic subunit	1013.82	1067.45	0.0752048	0.79184
ENSMUSG00000005983	GSMG0015366	1700037C18Rik // Gm41410	RIKEN cDNA 1700037C18 gene // predicted gene, 41410	60.1142	49.9779	-0.257421	0.667427
ENSMUSG00000005986	GSMG0019931	Ankrd13d	ankyrin repeat domain 13 family, member D	589.61	569.243	-0.0502177	0.877158
ENSMUSG00000006005	GSMG0000876	Tpr	translocated promoter region, nuclear basket protein	2480.7	1972.48	-0.330707	0.113554
ENSMUSG00000006010	GSMG0002210	BC003331	cDNA sequence BC003331	647.496	607.811	-0.0916885	0.758857
ENSMUSG00000006019	GSMG0035535	Dhx34	DEAH (Asp-Glu-Ala-His) box polypeptide 34	1010.3	1070.9	0.0839867	0.793803
ENSMUSG00000006021	GSMG0034046	Kptn	kaptin	507.637	582.621	0.200147	0.424983
ENSMUSG00000006024	GSMG0034045	Napa	N-ethylmaleimide sensitive fusion protein attachment protein alpha	2272.97	2586.47	0.186848	0.323544
ENSMUSG00000006050	GSMG0018855	Sra1	steroid receptor RNA activator 1	1285.23	1440.27	0.164563	0.423011
ENSMUSG00000006058	GSMG0005818	Snf8	SNF8, ESCRT-II complex subunit, homolog (S. cerevisiae)	1073.58	932.271	-0.203954	0.308539
ENSMUSG00000006095	GSMG0035735	Tbcb	tubulin folding cofactor B	1373.35	1104.7	-0.313408	0.134681
ENSMUSG00000006127	GSMG0005533	Inpp5k	inositol polyphosphate 5-phosphatase K	2123.99	2454.76	0.209199	0.289087
ENSMUSG00000006134	GSMG0014732	Crkl	v-crk avian sarcoma virus CT10 oncogene homolog-like	2147.09	2020.52	-0.0876068	0.692508
ENSMUSG00000006169	GSMG0005092	Clint1	clathrin interactor 1	1613.83	1665.07	0.0455378	0.874782
ENSMUSG00000006191	GSMG0010489	Cdkal1	CDK5 regulatory subunit associated protein 1-like 1	714.627	685.467	-0.0599731	0.854817
ENSMUSG00000006215	GSMG0027321	Zbtb17	zinc finger and BTB domain containing 17	1595.1	1505.94	-0.0833101	0.790429
ENSMUSG00000006219	GSMG0028589	Fblim1	filamin binding LIM protein 1	199.067	160.208	-0.315654	0.308363
ENSMUSG00000006235	GSMG0040459	Epor	erythropoietin receptor	512.694	331.574	-0.630903	0.00145356
ENSMUSG00000006241	GSMG0039229	Ccdc159	coiled-coil domain containing 159	348.916	309.885	-0.173069	0.654796
ENSMUSG00000006262	GSMG0029380	Mob1b	MOB kinase activator 1B	79.9486	72.0654	-0.149986	0.778971
ENSMUSG00000006273	GSMG0037353	Atp6v1b2	ATPase, H+ transporting, lysosomal V1 subunit B2	975.404	1001.79	0.0391737	0.900134
ENSMUSG00000006276	GSMG0038596	Eps15l1	epidermal growth factor receptor pathway substrate 15-like 1	2209.46	1901.2	-0.21726	0.331883
ENSMUSG00000006288	GSMG0012349	Ttc5	tetratricopeptide repeat domain 5	1221.03	1172.72	-0.0577254	0.834886
ENSMUSG00000006289	GSMG0012354	Osgep	O-sialoglycoprotein endopeptidase	836.913	809.172	-0.0473989	0.879253
ENSMUSG00000006299	GSMG0001752	Aamp	angio-associated migratory protein	2148.3	2068.13	-0.0541402	0.858234
ENSMUSG00000006301	GSMG0001754	Tmbim1	transmembrane BAX inhibitor motif containing 1	451.118	714.437	0.663616	9.34526e-05
ENSMUSG00000006304	GSMG0000417	Arpc2	actin related protein 2/3 complex, subunit 2	6317.22	4916	-0.361628	0.0240104
ENSMUSG00000006307	GSMG0035751	Kmt2b	lysine (K)-specific methyltransferase 2B	546.888	529.946	-0.0449228	0.902047
ENSMUSG00000006315	GSMG0035757	Tmem147	transmembrane protein 147	3096.6	2600.43	-0.25148	0.172066
ENSMUSG00000006333	GSMG0033942	Rps9	ribosomal protein S9	4030.51	2839.06	-0.505905	0.0152798
ENSMUSG00000006335	GSMG0035416	Tfpt	TCF3 (E2A) fusion partner	431.752	466.773	0.109925	0.717959
ENSMUSG00000006344	GSMG0003165	Ggt5	gamma-glutamyltransferase 5	445.596	669.346	0.588745	0.00288753
ENSMUSG00000006345	GSMG0003164	Ggt1	gamma-glutamyltransferase 1	168.066	277.39	0.722968	0.00376302
ENSMUSG00000006356	GSMG0008603	Crip2	cysteine rich protein 2	5453.72	6992.67	0.35872	0.0364288
ENSMUSG00000006362	GSMG0039026	Cbfa2t3	core-binding factor, runt domain, alpha subunit 2, translocated to, 3 (human)	481.903	678.666	0.492451	0.0626283
ENSMUSG00000006369	GSMG0013476	Fbln1	fibulin 1	1703.04	931.536	-0.869071	2.0673e-06
ENSMUSG00000006373	GSMG0041666	Pgrmc1	progesterone receptor membrane component 1	6840.72	5616.46	-0.284363	0.120647
ENSMUSG00000006378	GSMG0043737	Gcat	glycine C-acetyltransferase (2-amino-3-ketobutyrate-coenzyme A ligase)	120.059	72.8027	-0.721719	0.0370731
ENSMUSG00000006386	GSMG0026745	Tek	endothelial-specific receptor tyrosine kinase	11667.7	15114.5	0.3735	0.0426681
ENSMUSG00000006390	GSMG0026987	Elovl1	elongation of very long chain fatty acids (FEN1/Elo2, SUR4/Elo3, yeast)-like 1	1112.72	1473.38	0.405919	0.0371281
ENSMUSG00000006392	GSMG0026986	Med8	mediator complex subunit 8	906.03	680.876	-0.411023	0.0382978
ENSMUSG00000006395	GSMG0026985	Hyi	hydroxypyruvate isomerase (putative)	111.405	107.977	-0.0477707	0.927968
ENSMUSG00000006398	GSMG0028269	Cdc20	cell division cycle 20	1284.49	678.283	-0.919068	1.14162e-06
ENSMUSG00000006403	GSMG0001040	Adamts4	a disintegrin-like and metallopeptidase (reprolysin type) with thrombospondin type 1 motif, 4	229.293	429.432	0.904574	0.000738076
ENSMUSG00000006412	GSMG0001043	Pfdn2	prefoldin 2	925.009	691.123	-0.423121	0.0669147
ENSMUSG00000006418	GSMG0022193	Rnf114	ring finger protein 114	2107.05	2537.46	0.268402	0.150425
[truncated: 9,675 more rows]
