# Supplementary material for: In mice and humans, brain microvascular contractility matures postnatally Brain microvessel post-natal maturation
Source: Research Square preprint supplement (doi:10.21203/rs.3.rs-1608620/v1), 2022-05-11
Supplement: Supplementary file 3 [file 4e66835a18c3d103a3722eec.xlsx]

## Sheet: Biological processes
Term Type	GO ID with Link	GO Term	Nb Regulated Genes (Up / Down) (P15 versus P5	Nb Regulated Genes (Up / Down) (P15 versus P5	P-Value
biological_process	GO:0006084	acetyl-CoA metabolic process	7	4 (1/3)	0.0312
biological_process	GO:0030036	actin cytoskeleton organization	142	30 (10/20)	0.000507
biological_process	GO:0007015	actin filament organization	83	17 (11/6)	0.0147
biological_process	GO:0006919	activation of cysteine-type endopeptidase activity involved in apoptotic process	67	15 (7/8)	0.0109
biological_process	GO:0030534	adult behavior	38	11 (3/8)	0.00572
biological_process	GO:0007628	adult walking behavior	42	11 (3/8)	0.0119
biological_process	GO:0007568	aging	173	31 (20/11)	0.00578
biological_process	GO:0006865	amino acid transport	42	11 (3/8)	0.0119
biological_process	GO:0001525	angiogenesis	239	36 (27/9)	0.0369
biological_process	GO:0006915	apoptotic process	570	89 (46/43)	0.000314
biological_process	GO:0014002	astrocyte development	17	7 (4/3)	0.0067
biological_process	GO:0007411	axon guidance	149	45 (10/35)	2.42e-10
biological_process	GO:0016199	axon midline choice point recognition	5	4 (1/3)	0.0105
biological_process	GO:0007413	axonal fasciculation	18	8 (2/6)	0.0018
biological_process	GO:0007409	axonogenesis	107	24 (7/17)	0.000892
biological_process	GO:0009058	biosynthetic process	37	10 (1/9)	0.0145
biological_process	GO:0032060	bleb assembly	11	5 (5/0)	0.0237
biological_process	GO:0007420	brain development	216	52 (21/31)	4.56e-08
biological_process	GO:0050873	brown fat cell differentiation	34	11 (9/2)	0.00236
biological_process	GO:0055074	calcium ion homeostasis	28	8 (5/3)	0.0257
biological_process	GO:0006816	calcium ion transport	141	24 (17/7)	0.0279
biological_process	GO:0048791	calcium ion-regulated exocytosis of neurotransmitter	28	11 (7/4)	0.000432
biological_process	GO:0016339	calcium-dependent cell-cell adhesion via plasma membrane cell adhesion molecules	19	6 (2/4)	0.0462
biological_process	GO:0060317	cardiac epithelial to mesenchymal transition	13	5 (5/0)	0.0432
biological_process	GO:0007155	cell adhesion	485	107 (60/47)	5.75e-13
biological_process	GO:0007049	cell cycle	614	146 (20/126)	9.73e-21
biological_process	GO:0030154	cell differentiation	780	116 (56/60)	0.000271
biological_process	GO:0051301	cell division	374	88 (8/80)	2.09e-12
biological_process	GO:0016049	cell growth	49	11 (9/2)	0.0336
biological_process	GO:0016477	cell migration	191	36 (15/21)	0.00116
biological_process	GO:0000902	cell morphogenesis	81	16 (8/8)	0.025
biological_process	GO:0008283	cell proliferation	220	38 (13/25)	0.00402
biological_process	GO:0007160	cell-matrix adhesion	78	16 (13/3)	0.0181
biological_process	GO:0071313	cellular response to caffeine	8	4 (3/1)	0.046
biological_process	GO:0071277	cellular response to calcium ion	53	13 (9/4)	0.00941
biological_process	GO:0071320	cellular response to cAMP	50	11 (6/5)	0.0381
biological_process	GO:0071409	cellular response to cycloheximide	3	3 (2/1)	0.0322
biological_process	GO:0006974	cellular response to DNA damage stimulus	420	59 (7/52)	0.0283
biological_process	GO:0035690	cellular response to drug	75	15 (7/8)	0.0279
biological_process	GO:0071372	cellular response to follicle-stimulating hormone stimulus	14	6 (0/6)	0.0125
biological_process	GO:1904322	cellular response to forskolin	12	5 (1/4)	0.0326
biological_process	GO:0071480	cellular response to gamma radiation	24	7 (1/6)	0.0379
biological_process	GO:0070301	cellular response to hydrogen peroxide	57	15 (10/5)	0.00238
biological_process	GO:0071456	cellular response to hypoxia	103	25 (15/10)	0.000196
biological_process	GO:0032869	cellular response to insulin stimulus	88	18 (11/7)	0.0119
biological_process	GO:0071310	cellular response to organic substance	33	11 (6/5)	0.00184
biological_process	GO:0071560	cellular response to transforming growth factor beta stimulus	61	16 (9/7)	0.00166
biological_process	GO:0071294	cellular response to zinc ion	12	5 (4/1)	0.0326
biological_process	GO:0006882	cellular zinc ion homeostasis	18	6 (4/2)	0.0373
biological_process	GO:0022010	central nervous system myelination	9	6 (4/2)	0.00124
biological_process	GO:0021680	cerebellar Purkinje cell layer development	16	7 (2/5)	0.00476
biological_process	GO:0021987	cerebral cortex development	68	18 (4/14)	0.000689
biological_process	GO:0007268	chemical synaptic transmission	172	27 (11/16)	0.0471
biological_process	GO:0006935	chemotaxis	118	27 (15/12)	0.000283
biological_process	GO:1902476	chloride transmembrane transport	42	11 (6/5)	0.0119
biological_process	GO:0006821	chloride transport	80	17 (9/8)	0.0104
biological_process	GO:0006695	cholesterol biosynthetic process	32	12 (1/11)	0.000329
biological_process	GO:0008203	cholesterol metabolic process	89	20 (7/13)	0.00261
biological_process	GO:0007059	chromosome segregation	89	30 (1/29)	2.43e-08
biological_process	GO:0090102	cochlea development	29	8 (4/4)	0.0309
biological_process	GO:0021902	commitment of neuronal cell to specific neuron type in forebrain	7	5 (1/4)	0.00358
biological_process	GO:0016358	dendrite development	36	10 (0/10)	0.0121
biological_process	GO:0048813	dendrite morphogenesis	43	10 (4/6)	0.0368
biological_process	GO:0021542	dentate gyrus development	18	6 (1/5)	0.0373
biological_process	GO:0016311	dephosphorylation	109	21 (11/10)	0.0119
biological_process	GO:0002024	diet induced thermogenesis	13	5 (5/0)	0.0432
biological_process	GO:0071897	DNA biosynthetic process	19	6 (2/4)	0.0462
biological_process	GO:0006260	DNA replication	123	44 (1/43)	7.38e-13
biological_process	GO:0006270	DNA replication initiation	24	15 (0/15)	1.85e-08
biological_process	GO:0006268	DNA unwinding involved in DNA replication	10	8 (2/6)	1.48e-05
biological_process	GO:0006261	DNA-dependent DNA replication	16	7 (0/7)	0.00476
biological_process	GO:0035912	dorsal aorta morphogenesis	8	4 (4/0)	0.046
biological_process	GO:0006231	dTMP biosynthetic process	3	3 (0/3)	0.0322
biological_process	GO:0042755	eating behavior	38	9 (4/5)	0.0462
biological_process	GO:0048251	elastic fiber assembly	7	4 (4/0)	0.0312
biological_process	GO:0048013	ephrin receptor signaling pathway	43	12 (3/9)	0.00484
biological_process	GO:0010669	epithelial structure maintenance	6	4 (2/2)	0.0194
biological_process	GO:0000132	establishment of mitotic spindle orientation	25	8 (3/5)	0.0139
biological_process	GO:0060079	excitatory postsynaptic potential	36	13 (5/8)	0.000247
biological_process	GO:0006887	exocytosis	105	22 (15/7)	0.00368
biological_process	GO:0030198	extracellular matrix organization	114	30 (19/11)	7.54e-06
biological_process	GO:0045444	fat cell differentiation	79	17 (11/6)	0.00923
biological_process	GO:0006633	fatty acid biosynthetic process	74	15 (6/9)	0.0251
biological_process	GO:0030900	forebrain development	86	16 (6/10)	0.0404
biological_process	GO:0000082	G1/S transition of mitotic cell cycle	62	20 (5/15)	1.67e-05
biological_process	GO:0000086	G2/M transition of mitotic cell cycle	33	12 (3/9)	0.000446
biological_process	GO:0007214	gamma-aminobutyric acid signaling pathway	25	7 (3/4)	0.0455
biological_process	GO:0014009	glial cell proliferation	8	5 (2/3)	0.00656
biological_process	GO:0072112	glomerular visceral epithelial cell differentiation	7	4 (1/3)	0.0312
biological_process	GO:0007507	heart development	261	41 (22/19)	0.0138
biological_process	GO:0060347	heart trabecula formation	15	6 (6/0)	0.0171
biological_process	GO:0007157	heterophilic cell-cell adhesion via plasma membrane cell adhesion molecules	52	13 (3/10)	0.00805
biological_process	GO:0021766	hippocampus development	73	14 (3/11)	0.0466
biological_process	GO:0034109	homotypic cell-cell adhesion	8	5 (1/4)	0.00656
biological_process	GO:0060080	inhibitory postsynaptic potential	13	8 (3/5)	0.000158
biological_process	GO:0035556	intracellular signal transduction	400	59 (36/23)	0.0114
biological_process	GO:0006811	ion transport	584	119 (68/51)	7.28e-12
biological_process	GO:0008299	isoprenoid biosynthetic process	17	6 (0/6)	0.0294
biological_process	GO:0007612	learning	66	20 (8/12)	4.43e-05
biological_process	GO:0007611	learning or memory	51	16 (5/11)	0.000212
biological_process	GO:0002523	leukocyte migration involved in inflammatory response	13	5 (2/3)	0.0432
biological_process	GO:0051938	L-glutamate import	6	4 (4/0)	0.0194
biological_process	GO:0006629	lipid metabolic process	459	84 (42/42)	1.4e-06
biological_process	GO:0097421	liver regeneration	29	9 (2/7)	0.00963
biological_process	GO:0007616	long-term memory	34	10 (8/2)	0.00824
biological_process	GO:0045576	mast cell activation	13	5 (4/1)	0.0432
biological_process	GO:0051899	membrane depolarization	23	8 (4/4)	0.00859
biological_process	GO:0097320	membrane tubulation	12	5 (4/1)	0.0326
biological_process	GO:0007613	memory	83	23 (13/10)	4.67e-05
biological_process	GO:0051310	metaphase plate congression	12	8 (1/7)	8.05e-05
biological_process	GO:0001578	microtubule bundle formation	27	9 (1/8)	0.00604
biological_process	GO:0000226	microtubule cytoskeleton organization	96	21 (5/16)	0.00276
biological_process	GO:0007019	microtubule depolymerization	14	8 (1/7)	0.000287
biological_process	GO:0046785	microtubule polymerization	12	5 (2/3)	0.0326
biological_process	GO:0007018	microtubule-based movement	78	15 (2/13)	0.0377
biological_process	GO:0098779	mitophagy in response to mitochondrial depolarization	132	25 (14/11)	0.00707
biological_process	GO:0000278	mitotic cell cycle	38	11 (1/10)	0.00572
biological_process	GO:0007076	mitotic chromosome condensation	13	6 (1/5)	0.00882
biological_process	GO:0000281	mitotic cytokinesis	30	12 (2/10)	0.000171
biological_process	GO:0007067	mitotic nuclear division	277	73 (6/67)	6.15e-13
biological_process	GO:0000070	mitotic sister chromatid segregation	23	10 (0/10)	0.000381
biological_process	GO:0051256	mitotic spindle midzone assembly	6	4 (0/4)	0.0194
biological_process	GO:0003183	mitral valve morphogenesis	8	4 (2/2)	0.046
biological_process	GO:0016331	morphogenesis of embryonic epithelium	13	5 (4/1)	0.0432
biological_process	GO:0007275	multicellular organism development	1029	135 (55/80)	0.0107
biological_process	GO:0042552	myelination	60	15 (12/3)	0.00394
biological_process	GO:0050919	negative chemotaxis	26	8 (5/3)	0.0173
biological_process	GO:0048843	negative regulation of axon extension involved in axon guidance	26	10 (5/5)	0.00108
biological_process	GO:1902430	negative regulation of beta-amyloid formation	7	5 (5/0)	0.00358
biological_process	GO:0090090	negative regulation of canonical Wnt signaling pathway	102	18 (10/8)	0.0447
biological_process	GO:0007162	negative regulation of cell adhesion	42	11 (4/7)	0.0119
biological_process	GO:0045786	negative regulation of cell cycle	36	9 (4/5)	0.0346
biological_process	GO:0030308	negative regulation of cell growth	125	26 (17/9)	0.00162
biological_process	GO:0030336	negative regulation of cell migration	106	21 (14/7)	0.0088
biological_process	GO:0008285	negative regulation of cell proliferation	384	63 (38/25)	0.000742
biological_process	GO:0051481	negative regulation of cytosolic calcium ion concentration	17	7 (4/3)	0.0067
biological_process	GO:0045806	negative regulation of endocytosis	10	5 (4/1)	0.0165
biological_process	GO:0050680	negative regulation of epithelial cell proliferation	72	14 (10/4)	0.0423
biological_process	GO:0070373	negative regulation of ERK1 and ERK2 cascade	66	14 (11/3)	0.0222
biological_process	GO:2000270	negative regulation of fibroblast apoptotic process	9	5 (3/2)	0.0108
biological_process	GO:0007026	negative regulation of microtubule depolymerization	24	9 (3/6)	0.00268
biological_process	GO:0043524	negative regulation of neuron apoptotic process	160	35 (17/18)	7.77e-05
biological_process	GO:0010977	negative regulation of neuron projection development	64	15 (6/9)	0.00724
biological_process	GO:0090331	negative regulation of platelet aggregation	12	5 (3/2)	0.0326
biological_process	GO:0010871	negative regulation of receptor biosynthetic process	3	3 (3/0)	0.0322
biological_process	GO:0043433	negative regulation of sequence-specific DNA binding transcription factor activity	69	18 (12/6)	0.000824
biological_process	GO:0051154	negative regulation of striated muscle cell differentiation	3	3 (1/2)	0.0322
biological_process	GO:0000122	negative regulation of transcription from RNA polymerase II promoter	729	106 (45/61)	0.00112
biological_process	GO:2000678	negative regulation of transcription regulatory region DNA binding	13	7 (5/2)	0.00135
biological_process	GO:0030512	negative regulation of transforming growth factor beta receptor signaling pathway	54	13 (10/3)	0.0109
biological_process	GO:0007399	nervous system development	377	95 (26/69)	2.93e-15
biological_process	GO:0001755	neural crest cell migration	49	14 (9/5)	0.00159
biological_process	GO:0060563	neuroepithelial cell differentiation	9	5 (0/5)	0.0108
biological_process	GO:0022008	neurogenesis	65	15 (4/11)	0.00834
biological_process	GO:0048666	neuron development	58	13 (2/11)	0.019
biological_process	GO:0030182	neuron differentiation	127	23 (10/13)	0.0165
biological_process	GO:0001764	neuron migration	124	28 (9/19)	0.000268
biological_process	GO:0031175	neuron projection development	139	31 (8/23)	0.000149
biological_process	GO:1990138	neuron projection extension	24	7 (2/5)	0.0379
biological_process	GO:0019228	neuronal action potential	34	10 (3/7)	0.00824
biological_process	GO:0007269	neurotransmitter secretion	28	8 (3/5)	0.0257
biological_process	GO:0006836	neurotransmitter transport	45	10 (6/4)	0.0477
biological_process	GO:0009143	nucleoside triphosphate catabolic process	7	4 (2/2)	0.0312
biological_process	GO:0048709	oligodendrocyte differentiation	34	9 (4/5)	0.0251
biological_process	GO:0009311	oligosaccharide metabolic process	18	6 (4/2)	0.0373
biological_process	GO:0006730	one-carbon metabolic process	31	11 (2/9)	0.00107
biological_process	GO:0031100	organ regeneration	56	16 (7/9)	0.000644
biological_process	GO:0001649	osteoblast differentiation	113	21 (10/11)	0.0173
biological_process	GO:0003151	outflow tract morphogenesis	54	12 (9/3)	0.0269
biological_process	GO:0019800	peptide cross-linking via chondroitin 4-sulfate glycosaminoglycan	8	4 (3/1)	0.046
biological_process	GO:0030072	peptide hormone secretion	5	4 (2/2)	0.0105
biological_process	GO:0035335	peptidyl-tyrosine dephosphorylation	24	8 (4/4)	0.011
biological_process	GO:0014065	phosphatidylinositol 3-kinase signaling	25	7 (3/4)	0.0455
biological_process	GO:0009395	phospholipid catabolic process	19	6 (3/3)	0.0462
biological_process	GO:0016310	phosphorylation	612	99 (44/55)	3.57e-05
biological_process	GO:0030168	platelet activation	39	11 (9/2)	0.00696
biological_process	GO:0044794	positive regulation by host of viral process	7	4 (3/1)	0.0312
biological_process	GO:0043065	positive regulation of apoptotic process	335	66 (39/27)	1.71e-06
biological_process	GO:0032781	positive regulation of ATPase activity	24	7 (4/3)	0.0379
biological_process	GO:0045773	positive regulation of axon extension	40	10 (3/7)	0.0239
biological_process	GO:1902004	positive regulation of beta-amyloid formation	5	4 (3/1)	0.0105
biological_process	GO:0030513	positive regulation of BMP signaling pathway	36	9 (6/3)	0.0346
biological_process	GO:0030501	positive regulation of bone mineralization	37	11 (6/5)	0.00465
biological_process	GO:0050850	positive regulation of calcium-mediated signaling	24	7 (1/6)	0.0379
biological_process	GO:0010666	positive regulation of cardiac muscle cell apoptotic process	16	9 (7/2)	0.000103
biological_process	GO:0060045	positive regulation of cardiac muscle cell proliferation	23	7 (3/4)	0.0312
biological_process	GO:0010942	positive regulation of cell death	48	11 (10/1)	0.0295
biological_process	GO:0030335	positive regulation of cell migration	203	31 (19/12)	0.0454
biological_process	GO:0008284	positive regulation of cell proliferation	542	77 (42/35)	0.00959
biological_process	GO:0001954	positive regulation of cell-matrix adhesion	26	8 (6/2)	0.0173
biological_process	GO:0007204	positive regulation of cytosolic calcium ion concentration	148	26 (13/13)	0.0151
biological_process	GO:1903861	positive regulation of dendrite extension	19	6 (5/1)	0.0462
biological_process	GO:1900264	positive regulation of DNA-directed DNA polymerase activity	8	5 (0/5)	0.00656
biological_process	GO:0001938	positive regulation of endothelial cell proliferation	67	15 (13/2)	0.0109
biological_process	GO:0010718	positive regulation of epithelial to mesenchymal transition	34	9 (4/5)	0.0251
biological_process	GO:0045600	positive regulation of fat cell differentiation	49	14 (8/6)	0.00159
biological_process	GO:0048146	positive regulation of fibroblast proliferation	65	13 (6/7)	0.0429
biological_process	GO:0051491	positive regulation of filopodium assembly	31	9 (4/5)	0.0145
biological_process	GO:0010628	positive regulation of gene expression	399	63 (39/24)	0.00193
biological_process	GO:0014049	positive regulation of glutamate secretion	11	5 (2/3)	0.0237
biological_process	GO:0010460	positive regulation of heart rate	21	9 (8/1)	0.000997
biological_process	GO:0050729	positive regulation of inflammatory response	63	14 (10/4)	0.0153
biological_process	GO:0046330	positive regulation of JNK cascade	70	15 (11/4)	0.0159
biological_process	GO:0048170	positive regulation of long-term neuronal synaptic plasticity	8	4 (1/3)	0.046
biological_process	GO:0043406	positive regulation of MAP kinase activity	54	12 (6/6)	0.0269
biological_process	GO:0051901	positive regulation of mitochondrial depolarization	11	6 (5/1)	0.0038
biological_process	GO:0010976	positive regulation of neuron projection development	138	29 (13/16)	0.000699
biological_process	GO:0045669	positive regulation of osteoblast differentiation	68	15 (10/5)	0.0124
biological_process	GO:0050731	positive regulation of peptidyl-tyrosine phosphorylation	101	18 (11/7)	0.0412
biological_process	GO:0045860	positive regulation of protein kinase activity	64	13 (6/7)	0.0387
biological_process	GO:0001934	positive regulation of protein phosphorylation	184	31 (17/14)	0.0136
biological_process	GO:0061098	positive regulation of protein tyrosine kinase activity	20	7 (5/2)	0.0158
biological_process	GO:0048661	positive regulation of smooth muscle cell proliferation	80	16 (10/6)	0.0225
biological_process	GO:0032230	positive regulation of synaptic transmission, GABAergic	16	7 (3/4)	0.00476
biological_process	GO:0045909	positive regulation of vasodilation	38	9 (8/1)	0.0462
biological_process	GO:0010107	potassium ion import	26	9 (6/3)	0.00469
biological_process	GO:0071805	potassium ion transmembrane transport	90	28 (16/12)	4.85e-07
biological_process	GO:0006813	potassium ion transport	127	37 (25/12)	3.31e-08
biological_process	GO:0006461	protein complex assembly	66	15 (10/5)	0.00956
biological_process	GO:0051260	protein homooligomerization	197	39 (20/19)	0.000259
biological_process	GO:0051289	protein homotetramerization	74	15 (6/9)	0.0251
biological_process	GO:0017038	protein import	4	4 (3/1)	0.00458
biological_process	GO:0043491	protein kinase B signaling	38	11 (10/1)	0.00572
biological_process	GO:0034501	protein localization to kinetochore	10	6 (0/6)	0.00227
biological_process	GO:0051259	protein oligomerization	67	16 (7/9)	0.00441
biological_process	GO:0006468	protein phosphorylation	576	89 (36/53)	0.000446
biological_process	GO:0051262	protein tetramerization	41	10 (4/6)	0.0278
biological_process	GO:0003184	pulmonary valve morphogenesis	11	5 (4/1)	0.0237
biological_process	GO:0009113	purine nucleobase biosynthetic process	3	3 (0/3)	0.0322
biological_process	GO:0006220	pyrimidine nucleotide metabolic process	8	4 (0/4)	0.046
biological_process	GO:0072593	reactive oxygen species metabolic process	38	11 (8/3)	0.00572
biological_process	GO:0031623	receptor internalization	40	11 (8/3)	0.00841
biological_process	GO:0060371	regulation of atrial cardiac muscle cell membrane depolarization	8	4 (3/1)	0.046
biological_process	GO:0051988	regulation of attachment of spindle microtubules to kinetochore	7	4 (0/4)	0.0312
biological_process	GO:0045607	regulation of auditory receptor cell differentiation	7	5 (2/3)	0.00358
biological_process	GO:0050770	regulation of axonogenesis	28	9 (5/4)	0.00768
biological_process	GO:0008217	regulation of blood pressure	62	18 (16/2)	0.000212
biological_process	GO:0051924	regulation of calcium ion transport	37	10 (7/3)	0.0145
biological_process	GO:0017158	regulation of calcium ion-dependent exocytosis	24	7 (4/3)	0.0379
biological_process	GO:0043949	regulation of cAMP-mediated signaling	5	4 (3/1)	0.0105
biological_process	GO:0086004	regulation of cardiac muscle cell contraction	16	6 (5/1)	0.0227
biological_process	GO:0010881	regulation of cardiac muscle contraction by regulation of the release of sequestered calcium ion	8	5 (3/2)	0.00656
biological_process	GO:0030155	regulation of cell adhesion	42	11 (9/2)	0.0119
biological_process	GO:0051726	regulation of cell cycle	112	26 (9/17)	0.000298
biological_process	GO:0001558	regulation of cell growth	58	15 (11/4)	0.00283
biological_process	GO:0042127	regulation of cell proliferation	227	37 (23/14)	0.0114
biological_process	GO:0051480	regulation of cytosolic calcium ion concentration	35	9 (5/4)	0.0296
biological_process	GO:0048814	regulation of dendrite morphogenesis	23	7 (3/4)	0.0312
biological_process	GO:0017157	regulation of exocytosis	25	9 (7/2)	0.00358
biological_process	GO:0034765	regulation of ion transmembrane transport	135	38 (24/14)	5.66e-08
biological_process	GO:0048169	regulation of long-term neuronal synaptic plasticity	28	9 (6/3)	0.00768
biological_process	GO:0042391	regulation of membrane potential	97	19 (13/6)	0.0147
biological_process	GO:0031110	regulation of microtubule polymerization or depolymerization	10	5 (0/5)	0.0165
biological_process	GO:0007346	regulation of mitotic cell cycle	37	11 (4/7)	0.00465
biological_process	GO:0010975	regulation of neuron projection development	30	8 (2/6)	0.0367
biological_process	GO:0048168	regulation of neuronal synaptic plasticity	25	10 (8/2)	0.000781
biological_process	GO:2000310	regulation of N-methyl-D-aspartate selective glutamate receptor activity	16	7 (2/5)	0.00476
biological_process	GO:0014061	regulation of norepinephrine secretion	6	4 (2/2)	0.0194
biological_process	GO:0046578	regulation of Ras protein signal transduction	6	4 (1/3)	0.0194
biological_process	GO:0010880	regulation of release of sequestered calcium ion into cytosol by sarcoplasmic reticulum	17	6 (2/4)	0.0294
biological_process	GO:0035023	regulation of Rho protein signal transduction	77	15 (9/6)	0.0342
biological_process	GO:0051930	regulation of sensory perception of pain	41	15 (9/6)	5.66e-05
biological_process	GO:0048167	regulation of synaptic plasticity	42	10 (6/4)	0.0321
biological_process	GO:0003081	regulation of systemic arterial blood pressure by renin-angiotensin	5	4 (4/0)	0.0105
biological_process	GO:0061469	regulation of type B pancreatic cell proliferation	7	4 (3/1)	0.0312
biological_process	GO:2001212	regulation of vasculogenesis	3	3 (3/0)	0.0322
biological_process	GO:0051592	response to calcium ion	68	14 (9/5)	0.0279
biological_process	GO:0009409	response to cold	40	12 (9/3)	0.00263
biological_process	GO:0042493	response to drug	339	48 (19/29)	0.0424
biological_process	GO:0045471	response to ethanol	117	21 (9/12)	0.0246
biological_process	GO:0001666	response to hypoxia	192	35 (24/11)	0.00244
biological_process	GO:0002931	response to ischemia	36	10 (6/4)	0.0121
biological_process	GO:0034616	response to laminar fluid shear stress	7	4 (3/1)	0.0312
biological_process	GO:0032496	response to lipopolysaccharide	197	31 (22/9)	0.0321
biological_process	GO:0035094	response to nicotine	45	10 (8/2)	0.0477
biological_process	GO:0010033	response to organic substance	65	13 (6/7)	0.0429
biological_process	GO:0010243	response to organonitrogen compound	23	7 (2/5)	0.0312
biological_process	GO:0009636	response to toxic substance	86	17 (11/6)	0.0202
biological_process	GO:0060041	retina development in camera-type eye	84	18 (9/9)	0.00748
biological_process	GO:0048511	rhythmic process	128	22 (14/8)	0.0326
biological_process	GO:0097264	self proteolysis	8	4 (2/2)	0.046
biological_process	GO:0071526	semaphorin-plexin signaling pathway	34	12 (4/8)	0.000596
biological_process	GO:0019233	sensory perception of pain	77	19 (11/8)	0.00113
biological_process	GO:0007605	sensory perception of sound	138	25 (15/10)	0.0121
biological_process	GO:0023052	signaling	8	4 (2/2)	0.046
biological_process	GO:0001501	skeletal system development	107	19 (11/8)	0.0366
biological_process	GO:0007264	small GTPase mediated signal transduction	236	40 (25/15)	0.00437
biological_process	GO:0035725	sodium ion transmembrane transport	36	10 (5/5)	0.0121
biological_process	GO:0006814	sodium ion transport	124	22 (12/10)	0.0238
biological_process	GO:0006665	sphingolipid metabolic process	36	9 (5/4)	0.0346
biological_process	GO:0031577	spindle checkpoint	3	3 (0/3)	0.0322
biological_process	GO:0007051	spindle organization	16	6 (1/5)	0.0227
biological_process	GO:0001964	startle response	22	8 (4/4)	0.00657
biological_process	GO:0006694	steroid biosynthetic process	62	16 (2/14)	0.00198
biological_process	GO:0008202	steroid metabolic process	84	20 (7/13)	0.00128
biological_process	GO:0016126	sterol biosynthetic process	27	12 (0/12)	5.54e-05
biological_process	GO:0021762	substantia nigra development	38	10 (6/4)	0.0173
biological_process	GO:0043129	surfactant homeostasis	13	5 (4/1)	0.0432
biological_process	GO:0051932	synaptic transmission, GABAergic	12	6 (3/3)	0.00595
biological_process	GO:0035249	synaptic transmission, glutamatergic	29	11 (5/6)	0.000596
biological_process	GO:0021537	telencephalon development	30	8 (2/6)	0.0367
biological_process	GO:0000723	telomere maintenance	38	10 (1/9)	0.0173
biological_process	GO:0046654	tetrahydrofolate biosynthetic process	4	4 (1/3)	0.00458
biological_process	GO:0042403	thyroid hormone metabolic process	10	6 (3/3)	0.00227
biological_process	GO:0007179	transforming growth factor beta receptor signaling pathway	75	15 (13/2)	0.0279
biological_process	GO:0007169	transmembrane receptor protein tyrosine kinase signaling pathway	100	19 (8/11)	0.0198
biological_process	GO:0055085	transmembrane transport	364	60 (34/26)	0.000893
biological_process	GO:0006810	transport	1822	242 (131/111)	0.000288
biological_process	GO:0001570	vasculogenesis	68	14 (11/3)	0.0279
biological_process	GO:0042310	vasoconstriction	19	6 (5/1)	0.0462
biological_process	GO:0060412	ventricular septum morphogenesis	38	13 (10/3)	0.000436
biological_process	GO:0034372	very-low-density lipoprotein particle remodeling	7	4 (2/2)	0.0312
biological_process	GO:0042060	wound healing	94	21 (17/4)	0.00213

## Sheet: Cellular Component
Term Type	GO ID with Link	GO Term	Nb Regulated Genes (Up / Down) (P15 versus P5	Nb Regulated Genes (Up / Down) (P15 versus P5	P-Value
cellular_component	GO:0015629	actin cytoskeleton	201	31 (14/17)	0.0296
cellular_component	GO:0005912	adherens junction	55	14 (7/7)	0.00377
cellular_component	GO:0031225	anchored component of membrane	141	36 (14/22)	8.81e-07
cellular_component	GO:0045177	apical part of cell	115	23 (12/11)	0.00377
cellular_component	GO:0016324	apical plasma membrane	328	52 (37/15)	0.00261
cellular_component	GO:0030424	axon	370	87 (35/52)	6.79e-13
cellular_component	GO:0043203	axon hillock	8	4 (2/2)	0.0428
cellular_component	GO:0043679	axon terminus	86	21 (16/5)	0.000467
cellular_component	GO:0005605	basal lamina	19	9 (6/3)	0.000372
cellular_component	GO:0009925	basal plasma membrane	42	10 (6/4)	0.0274
cellular_component	GO:0005604	basement membrane	97	28 (18/10)	1.44e-06
cellular_component	GO:0016323	basolateral plasma membrane	203	32 (19/13)	0.0205
cellular_component	GO:0005901	caveola	86	22 (14/8)	0.000165
cellular_component	GO:0044297	cell body	102	19 (5/14)	0.0185
cellular_component	GO:0030054	cell junction	718	138 (75/63)	1.63e-12
cellular_component	GO:0042995	cell projection	712	115 (52/63)	2.4e-06
cellular_component	GO:0009986	cell surface	629	127 (74/53)	4.03e-13
cellular_component	GO:0005911	cell-cell junction	201	37 (16/21)	0.000931
cellular_component	GO:0097149	centralspindlin complex	3	3 (0/3)	0.0305
cellular_component	GO:0005813	centrosome	435	69 (19/50)	0.000494
cellular_component	GO:0034707	chloride channel complex	46	14 (8/6)	0.000645
cellular_component	GO:0000785	chromatin	126	24 (6/18)	0.00566
cellular_component	GO:0005694	chromosome	344	67 (3/64)	8.27e-07
cellular_component	GO:0032133	chromosome passenger complex	5	4 (0/4)	0.00974
cellular_component	GO:0000775	chromosome, centromeric region	141	49 (1/48)	3.91e-14
cellular_component	GO:0005581	collagen trimer	83	18 (17/1)	0.00502
cellular_component	GO:0000777	condensed chromosome kinetochore	84	26 (0/26)	9.01e-07
cellular_component	GO:0000940	condensed chromosome outer kinetochore	9	6 (0/6)	0.00109
cellular_component	GO:0000778	condensed nuclear chromosome kinetochore	7	5 (0/5)	0.00323
cellular_component	GO:0030864	cortical actin cytoskeleton	43	13 (9/4)	0.00116
cellular_component	GO:0031390	Ctf18 RFC-like complex	8	4 (0/4)	0.0428
cellular_component	GO:0005737	cytoplasm	6631	890 (385/505)	9.34e-22
cellular_component	GO:0031410	cytoplasmic vesicle	646	86 (54/32)	0.016
cellular_component	GO:0030659	cytoplasmic vesicle membrane	120	23 (14/9)	0.00637
cellular_component	GO:0005856	cytoskeleton	1113	185 (54/131)	1.25e-10
cellular_component	GO:0005829	cytosol	1784	215 (109/106)	0.016
cellular_component	GO:0030425	dendrite	490	108 (51/57)	8.32e-14
cellular_component	GO:0043198	dendritic shaft	61	18 (8/10)	0.000121
cellular_component	GO:0043197	dendritic spine	148	36 (19/17)	2.92e-06
cellular_component	GO:0071953	elastic fiber	4	4 (3/1)	0.00422
cellular_component	GO:0005783	endoplasmic reticulum	1323	162 (93/69)	0.0228
cellular_component	GO:0070062	extracellular exosome	2674	359 (203/156)	1.54e-07
cellular_component	GO:0031012	extracellular matrix	294	69 (46/23)	2.2e-10
cellular_component	GO:0005576	extracellular region	1753	243 (160/83)	2.48e-06
cellular_component	GO:0005615	extracellular space	1504	201 (131/70)	0.000173
cellular_component	GO:0031234	extrinsic component of cytoplasmic side of plasma membrane	68	13 (9/4)	0.0485
cellular_component	GO:0030175	filopodium	77	18 (8/10)	0.0022
cellular_component	GO:1902711	GABA-A receptor complex	18	7 (3/4)	0.008
cellular_component	GO:0005794	Golgi apparatus	1190	164 (81/83)	0.000176
cellular_component	GO:0005796	Golgi lumen	21	7 (4/3)	0.0178
cellular_component	GO:0030426	growth cone	159	42 (17/25)	3.36e-08
cellular_component	GO:0043657	host cell	3	3 (2/1)	0.0305
cellular_component	GO:0030173	integral component of Golgi membrane	50	12 (10/2)	0.0128
cellular_component	GO:0005887	integral component of plasma membrane	1126	174 (94/80)	1.04e-07
cellular_component	GO:0014704	intercalated disc	51	12 (4/8)	0.0149
cellular_component	GO:0043231	intracellular membrane-bounded organelle	751	101 (53/48)	0.00695
cellular_component	GO:0044224	juxtaparanode region of axon	10	6 (5/1)	0.002
cellular_component	GO:0005871	kinesin complex	52	15 (2/13)	0.000693
cellular_component	GO:0000776	kinetochore	120	39 (0/39)	1.98e-10
cellular_component	GO:0043256	laminin complex	3	3 (2/1)	0.0305
cellular_component	GO:0042555	MCM complex	9	7 (0/7)	8.31e-05
cellular_component	GO:0072687	meiotic spindle	9	7 (4/3)	8.31e-05
cellular_component	GO:0016020	membrane	6998	989 (512/477)	8.91e-35
cellular_component	GO:0045121	membrane raft	262	45 (25/20)	0.00109
cellular_component	GO:0001527	microfibril	11	5 (4/1)	0.0216
cellular_component	GO:0005874	microtubule	327	78 (17/61)	5.51e-12
cellular_component	GO:0015630	microtubule cytoskeleton	158	26 (3/23)	0.0235
cellular_component	GO:0030496	midbody	130	28 (6/22)	0.000384
cellular_component	GO:0072686	mitotic spindle	47	14 (3/11)	0.000808
cellular_component	GO:0043209	myelin sheath	192	42 (28/14)	6.85e-06
cellular_component	GO:0031262	Ndc80 complex	4	4 (0/4)	0.00422
cellular_component	GO:0031594	neuromuscular junction	64	16 (7/9)	0.00211
cellular_component	GO:0043005	neuron projection	420	83 (37/46)	1.79e-08
cellular_component	GO:0043025	neuronal cell body	534	124 (61/63)	8.97e-18
cellular_component	GO:0032809	neuronal cell body membrane	29	10 (7/3)	0.00212
cellular_component	GO:0017146	NMDA selective glutamate receptor complex	12	6 (3/3)	0.00527
cellular_component	GO:0000784	nuclear chromosome, telomeric region	127	21 (1/20)	0.0414
cellular_component	GO:0005635	nuclear envelope	158	27 (17/10)	0.0133
cellular_component	GO:0005720	nuclear heterochromatin	27	10 (3/7)	0.0012
cellular_component	GO:0031965	nuclear membrane	226	41 (15/26)	0.00064
cellular_component	GO:0005654	nucleoplasm	1935	237 (72/165)	0.00592
cellular_component	GO:0005634	nucleus	6019	685 (242/443)	0.00377
cellular_component	GO:0033270	paranode region of axon	15	6 (5/1)	0.0153
cellular_component	GO:0043204	perikaryon	150	37 (26/11)	1.46e-06
cellular_component	GO:0048471	perinuclear region of cytoplasm	692	125 (66/59)	1.21e-09
cellular_component	GO:0005886	plasma membrane	4874	611 (332/279)	7.3e-08
cellular_component	GO:0002102	podosome	32	8 (4/4)	0.0443
cellular_component	GO:0098794	postsynapse	26	8 (3/5)	0.015
cellular_component	GO:0014069	postsynaptic density	239	60 (36/24)	2.32e-10
cellular_component	GO:0045211	postsynaptic membrane	222	59 (32/27)	2.95e-11
cellular_component	GO:0034705	potassium channel complex	11	7 (5/2)	0.000379
cellular_component	GO:0098793	presynapse	63	15 (10/5)	0.0049
cellular_component	GO:0042734	presynaptic membrane	75	22 (10/12)	1.87e-05
cellular_component	GO:0043234	protein complex	628	80 (41/39)	0.0492
cellular_component	GO:0005578	proteinaceous extracellular matrix	316	84 (55/29)	1.14e-15
cellular_component	GO:0031298	replication fork protection complex	6	4 (0/4)	0.0179
cellular_component	GO:0032587	ruffle membrane	79	17 (12/5)	0.00713
cellular_component	GO:0042383	sarcolemma	118	28 (19/9)	7.04e-05
cellular_component	GO:0030667	secretory granule membrane	26	7 (5/2)	0.0481
cellular_component	GO:0005819	spindle	116	29 (5/24)	1.85e-05
cellular_component	GO:0005876	spindle microtubule	40	10 (0/10)	0.0203
cellular_component	GO:0051233	spindle midzone	19	8 (1/7)	0.0022
cellular_component	GO:0000922	spindle pole	106	24 (2/22)	0.000529
cellular_component	GO:0001725	stress fiber	67	16 (7/9)	0.00339
cellular_component	GO:0045202	synapse	505	116 (65/51)	3.62e-16
cellular_component	GO:0043083	synaptic cleft	8	5 (2/3)	0.00593
cellular_component	GO:0008021	synaptic vesicle	126	23 (15/8)	0.0112
cellular_component	GO:0043195	terminal bouton	113	20 (10/10)	0.0254
cellular_component	GO:0030133	transport vesicle	64	15 (10/5)	0.00569
cellular_component	GO:0030315	T-tubule	57	14 (7/7)	0.00522
cellular_component	GO:0031982	vesicle	164	28 (16/12)	0.0117
cellular_component	GO:0008076	voltage-gated potassium channel complex	79	29 (13/16)	2.76e-09
cellular_component	GO:0001518	voltage-gated sodium channel complex	14	6 (2/4)	0.0111
