# Supplementary material for: In mice and humans, brain microvascular contractility matures postnatally Brain microvessel post-natal maturation
Source: Research Square preprint supplement (doi:10.21203/rs.3.rs-1608620/v1), 2022-05-11
Supplement: Supplementary file 4 [file d901db5e56020e9a6bd204d7.xlsx]

## Sheet: EC
Transcript identification				Expression in single-cell (Vanlandewijck et al., 2018)				MV RNA seq analysis
								P15 vs P5
Cluster	Gene	Stable ID	Name	% of cells expressed in cluster	% of cells expressed in other clusters	logFC	Adjusted P-value	log2FoldChange	Adjusted P-value
EC	Abcb1a	GSMG0028802	ATP-binding cassette, sub-family B (MDR/TAP), member 1A	0.986	0.08	2.41296	0	1.21656	7.53631e-17
EC	Abcg2	GSMG0031959	ATP-binding cassette, sub-family G (WHITE), member 2	0.941	0.226	2.07744	0	0.409205	0.00553245
EC	Acer2	GSMG0026717	alkaline ceramidase 2	0.757	0.061	1.87603	0	3.00839	3.36603e-62
EC	Acvrl1	GSMG0013660	activin A receptor, type II-like 1	0.929	0.117	2.04087	0	0.84826	9.07437e-10
EC	Afap1l1	GSMG0019028	actin filament associated protein 1-like 1	0.765	0.066	1.79874	0	0.404532	0.000665871
EC	Alas1	GSMG0041250	aminolevulinic acid synthase 1	0.8	0.18	1.50808	0	0.507855	9.91391e-05
EC	Anxa3	GSMG0029452	annexin A3	0.853	0.168	1.79485	0	0.447164	0.000832715
EC	Arl4a	GSMG0008816	ADP-ribosylation factor-like 4A	0.865	0.19	1.72929	0	0.221198	0.111384
EC	AW112010	GSMG0020109	expressed sequence AW112010	0.626	0.027	1.52581	0	1.36746	4.81549e-06
EC	Cd34	GSMG0001261	CD34 antigen	0.952	0.138	2.40991	0	-0.0780698	0.556311
EC	Cd93	GSMG0023660	CD93 antigen	0.791	0.057	1.70656	0	-0.50308	0.0150279
EC	Cdh5	GSMG0037685	cadherin 5	0.946	0.051	1.6571	0	0.0474711	0.795444
EC	Cldn5	GSMG0014759	claudin 5	0.999	0.157	5.41879	0	0.129275	0.419129
EC	Ctla2a	GSMG0010763	cytotoxic T lymphocyte-associated protein 2 alpha	0.798	0.035	2.09016	0	0.280034	0.0246658
EC	Egfl7	GSMG0020825	EGF-like domain 7	0.996	0.078	2.86769	0	0.167761	0.205586
EC	Eltd1	GSMG0025094	adhesion G protein-coupled receptor L4	0.986	0.071	3.02087	0	-0.175782	0.00169377
EC	Eogt	GSMG0033430	EGF domain-specific O-linked N-acetylglucosamine (GlcNAc) transferase	0.859	0.101	2.0016	0	0.738203	4.8819e-10
EC	Fn1	GSMG0001727	fibronectin 1	0.879	0.108	2.05483	0	0.409904	0.0342064
EC	Gbp3	GSMG0025045	guanylate binding protein 3	0.668	0.058	1.65008	0	-0.00834419	0.968039
EC	Gpr116	GSMG0016685	adhesion G protein-coupled receptor F5	0.984	0.233	2.27147	0	0.434679	3.58649e-07
EC	Grap	GSMG0005310	GRB2-related adaptor protein	0.812	0.12	1.57995	0	0.218538	0.0941858
EC	Gsta4	GSMG0039838	glutathione S-transferase, alpha 4	0.775	0.131	1.57663	0	0.755106	1.21602e-06
EC	Hmgcs2	GSMG0024713	3-hydroxy-3-methylglutaryl-Coenzyme A synthase 2	0.732	0.06	2.02619	0	-0.0933422	0.49779
EC	Icam2	GSMG0007513	intercellular adhesion molecule 2	0.819	0.029	1.72964	0	0.513406	0.000637444
EC	Id1	GSMG0021983	inhibitor of DNA binding 1	0.866	0.175	1.69719	0	0.902673	1.8978e-07
EC	Ivns1abp	GSMG0000880	influenza virus NS1A binding protein	0.7	0.186	1.85855	2.31031e-214	-0.370368	0.0106815
EC	Jam2	GSMG0015251	junction adhesion molecule 2	0.866	0.192	1.51571	0	0.168586	0.208311
EC	Kank3	GSMG0016523	KN motif and ankyrin repeat domains 3	0.912	0.083	1.91033	0	0.231169	0.0697371
EC	Kdr	GSMG0030642	kinase insert domain protein receptor	0.836	0.041	1.96757	0	-0.0946617	0.504183
EC	Kitl	GSMG0003474	kit ligand	0.855	0.152	1.65638	0	1.18621	3.07859e-16
EC	Lmo2	GSMG0021490	LIM domain only 2	0.827	0.079	1.6285	0	-0.199509	0.104321
EC	Lsr	GSMG0035766	lipolysis stimulated lipoprotein receptor	0.899	0.061	2.17071	0	0.303769	0.0145436
EC	Ly6c1	GSMG0014131	lymphocyte antigen 6 complex, locus C1	0.999	0.18	3.6895	0	1.85781	6.29852e-43
EC	Ly6e	GSMG0013278	lymphocyte antigen 6 complex, locus E	0.997	0.244	3.35647	0	1.66919	5.19901e-26
EC	Mfsd2a	GSMG0028313	major facilitator superfamily domain containing 2A	0.804	0.14	2.03088	0	-0.257426	0.0303413
EC	Mpzl1	GSMG0002373	myelin protein zero-like 1	0.887	0.165	2.03868	0	-0.145271	0.283423
EC	Ocln	GSMG0011033	occludin	0.829	0.058	1.89895	0	0.814379	1.43209e-09
EC	Palmd	GSMG0025978	palmdelphin	0.868	0.128	1.72886	0	0.118539	0.45548
EC	Paqr5	GSMG0040880	progestin and adipoQ receptor family member V	0.7	0.027	1.55215	0	2.988	1.14251e-58
EC	Pecam1	GSMG0007522	platelet/endothelial cell adhesion molecule 1	0.958	0.063	2.60712	0	0.121624	0.327257
EC	Plk2	GSMG0010199	polo-like kinase 2	0.74	0.093	2.01992	0	0.501462	0.000280535
EC	Podxl	GSMG0032830	podocalyxin-like	0.978	0.069	2.39591	0	0.567648	0.000178168
EC	Prkch	GSMG0008182	protein kinase C, eta	0.718	0.02	1.50443	0	0.277158	0.0461873
EC	Prom1	GSMG0030436	prominin 1	0.95	0.078	2.84185	0	1.48167	1.49067e-30
EC	Ptprb	GSMG0003557	protein tyrosine phosphatase, receptor type, B	0.982	0.083	2.6693	0	0.729569	4.87528e-07
EC	Ramp2	GSMG0065019	receptor (calcitonin) activity modifying protein 2	0.978	0.124	2.49213	0	0.0929396	0.474457
EC	Robo4	GSMG0039349	roundabout guidance receptor 4	0.87	0.035	1.97307	0	0.177322	0.194342
EC	Sdpr	GSMG0000236	serum deprivation response	0.766	0.056	1.69785	0	0.934553	9.47258e-07
EC	Sema3c	GSMG0028856	sema domain, immunoglobulin domain (Ig), short basic domain, secreted, (semaphorin) 3C	0.72	0.045	1.67441	0	2.97022	6.35544e-79
EC	Slc16a1	GSMG0024772	solute carrier family 16 (monocarboxylic acid transporters), member 1	0.811	0.178	2.116	0	0.756715	2.89146e-07
EC	Slc16a4	GSMG0024804	solute carrier family 16 (monocarboxylic acid transporters), member 4	0.604	0.044	1.57567	1.01961e-282	0.553549	0.00160294
EC	Slc38a3	GSMG0041281	solute carrier family 38, member 3	0.879	0.172	1.50011	0	0.0594236	0.670579
EC	Slc39a10	GSMG0001550	solute carrier family 39 (zinc transporter), member 10	0.916	0.182	1.98012	0	-0.0639637	0.691157
EC	Slc39a8	GSMG0024979	solute carrier family 39 (metal ion transporter), member 8	0.658	0.038	1.6246	0	-0.832092	4.12112e-09
EC	Slc40a1	GSMG0001548	solute carrier family 40 (iron-regulated transporter), member 1	0.856	0.064	2.33552	0	-0.0386477	0.749919
EC	Slc7a1	GSMG0031384	solute carrier family 7 (cationic amino acid transporter, y+ system), member 1	0.863	0.169	1.72713	0	-0.752254	1.72017e-09
EC	Slc7a5	GSMG0039010	solute carrier family 7 (cationic amino acid transporter, y+ system), member 5	0.916	0.134	2.49871	0	-0.405051	0.00498148
EC	Slco1a4	GSMG0033846	solute carrier organic anion transporter family, member 1a4	0.995	0.169	3.66718	0	2.41112	4.51041e-66
EC	Slco1c1	GSMG0032619	solute carrier organic anion transporter family, member 1c1	0.976	0.171	2.86847	0	0.0878757	0.547574
EC	Slco2b1	GSMG0036314	solute carrier organic anion transporter family, member 2b1	0.802	0.052	2.01116	0	-0.0213449	0.874196
EC	Sox18	GSMG0024048	SRY (sex determining region Y)-box 18	0.898	0.03	2.08253	0	0.0918797	0.489226
EC	Spock2	GSMG0003043	sparc/osteonectin, cwcv and kazal-like domains proteoglycan 2	0.994	0.149	2.56638	0	-0.0826417	0.649429
EC	Srgn	GSMG0004162	serglycin	0.964	0.108	2.19117	0	0.295521	0.0665927
EC	St3gal6	GSMG0015847	ST3 beta-galactoside alpha-2,3-sialyltransferase 6	0.868	0.181	1.65779	0	0.784834	6.88842e-08
EC	Tdrp	GSMG0038124	testis development related protein	0.844	0.041	2.04826	0	-0.0941775	0.594442
EC	Tek	GSMG0026745	endothelial-specific receptor tyrosine kinase	0.966	0.082	2.6799	0	0.3735	0.0086973
EC	Tfrc	GSMG0014892	transferrin receptor	0.749	0.183	1.87648	1.00521e-263	0.0385362	0.753977
EC	Tie1	GSMG0028271	tyrosine kinase with immunoglobulin-like and EGF-like domains 1	0.947	0.063	2.07565	0	-0.0617019	0.638654
EC	Tspan13	GSMG0008806	tetraspanin 13	0.978	0.111	2.65504	0	-0.0134874	0.934224
EC	Ucp2	GSMG0034882	uncoupling protein 2 (mitochondrial, proton carrier)	0.913	0.222	1.82323	0	0.502514	0.000336134
EC	Ushbp1	GSMG0038574	Usher syndrome 1C binding protein 1	0.817	0.026	1.55238	0	0.0357992	0.775065
EC	Vwa1	GSMG0028755	von Willebrand factor A domain containing 1	0.984	0.181	2.57425	0	0.116035	0.341975
EC	Wfdc1	GSMG0037890	WAP four-disulfide core domain 1	0.929	0.167	1.83587	0	1.50103	1.15965e-26

## Sheet: FB
Transcript identification				Expression in single-cell (Vanlandewijck et al., 2018)				MV RNA seq analysis
								P15 vs P5
Cluster	Gene	Stable ID	Name	% of cells expressed in cluster	% of cells expressed in other clusters	logFC	Adjusted P-value	log2FoldChange	Adjusted P-value
FB	Aebp1	GSMG0004858	AE binding protein 1	0.791	0.036	1.61666	1.27855e-203	-0.473016	0.0248902
FB	Alpl	GSMG0028539	alkaline phosphatase, liver/bone/kidney	0.64	0.226	1.68748	4.17575e-17	1.64964	4.49432e-25
FB	Ccdc80	GSMG0015080	coiled-coil domain containing 80	0.651	0.084	1.76295	1.72464e-70	-0.259118	0.153372
FB	Coch	GSMG0008048	cochlin	0.686	0.016	2.94835	1.5016e-257	0.730039	2.13656e-05
FB	Col1a1	GSMG0005795	collagen, type I, alpha 1	0.93	0.028	2.47368	0	-0.243556	0.197166
FB	Col1a2	GSMG0031435	collagen, type I, alpha 2	0.988	0.232	2.16641	2.77723e-76	0.498742	0.000106231
FB	Col3a1	GSMG0000219	collagen, type III, alpha 1	0.872	0.074	2.33771	2.81524e-147	0.669525	1.43481e-05
FB	Col5a1	GSMG0020843	collagen, type V, alpha 1	0.837	0.043	1.59385	1.20047e-201	1.14298	2.04965e-10
FB	Col6a1	GSMG0004273	collagen, type VI, alpha 1	0.895	0.011	2.14316	0	2.09846	7.56578e-33
FB	Col6a2	GSMG0004272	collagen, type VI, alpha 2	0.86	0.061	1.56413	4.72857e-159	0.61323	1.06139e-05
FB	Cpxm1	GSMG0065081	carboxypeptidase X 1 (M14 family)	0.616	0.014	1.84854	8.98256e-233	-0.712958	0.000169129
FB	Ctgf	GSMG0002808	connective tissue growth factor	0.849	0.211	1.64273	2.7225e-47	1.62431	1.55687e-12
FB	Cygb	GSMG0007671	cytoglobin	0.721	0.156	1.54987	5.60858e-47	0.572114	0.0122842
FB	Dcn	GSMG0003452	decorin	0.965	0.091	4.48238	1.14533e-160	0.595057	0.000672064
FB	Efemp1	GSMG0004975	epidermal growth factor-containing fibulin-like extracellular matrix protein 1	0.895	0.028	2.91617	1.52496e-299	0.158988	0.552683
FB	F3	GSMG0024874	coagulation factor III	0.791	0.087	1.65833	1.04786e-91	1.54607	7.50378e-16
FB	Gsn	GSMG0020958	gelsolin	0.895	0.163	2.76889	1.16805e-74	1.75326	1.60376e-17
FB	Igfbp2	GSMG0000409	insulin-like growth factor binding protein 2	0.616	0.03	1.97502	2.40806e-145	-0.301331	0.100762
FB	Igfbp4	GSMG0005899	insulin-like growth factor binding protein 4	0.884	0.097	3.05304	4.56961e-125	-0.8495	2.53398e-11
FB	Igfbp5	GSMG0001738	insulin-like growth factor binding protein 5	0.698	0.059	2.6457	6.55339e-113	-0.128247	0.460513
FB	Islr	GSMG0040836	immunoglobulin superfamily containing leucine-rich repeat	0.86	0.049	1.73676	3.04719e-191	0.282957	0.140482
FB	Itga8	GSMG0022417	integrin alpha 8	0.674	0.067	1.66304	1.6471e-91	0.406289	0.0400768
FB	Lama1	GSMG0016872	laminin, alpha 1	0.64	0.02	1.63682	5.70695e-206	1.03906	1.5687e-09
FB	Lbp	GSMG0022080	lipopolysaccharide binding protein	0.674	0.029	1.83222	2.77198e-180	1.00492	5.43565e-05
FB	Lum	GSMG0003453	lumican	0.872	0.015	3.7771	0	2.33773	9.33142e-21
FB	Mfap4	GSMG0005306	microfibrillar-associated protein 4	0.663	0.006	2.14126	0	0.834631	5.43006e-05
FB	Ogn	GSMG0009748	osteoglycin	0.814	0.138	1.50605	6.06069e-66	-0.226746	0.239031
FB	Olfml3	GSMG0025833	olfactomedin-like 3	0.837	0.065	1.97565	6.99524e-148	0.0395027	0.819616
FB	Plekha6	GSMG0000780	pleckstrin homology domain containing, family A member 6	0.686	0.025	1.51306	4.54742e-204	0.232692	0.351802
FB	Ptgds	GSMG0022531	prostaglandin D2 synthase (brain)	0.93	0.098	3.18015	6.06831e-112	0.881268	4.22662e-05
FB	Rbp1	GSMG0039956	retinol binding protein 1, cellular	0.837	0.135	1.67805	4.75765e-79	-0.318523	0.0566965
FB	Serpinf1	GSMG0006982	serine (or cysteine) peptidase inhibitor, clade F, member 1	0.849	0.019	2.43846	0	0.360564	0.0372883
FB	Serping1	GSMG0023064	serine (or cysteine) peptidase inhibitor, clade G, member 1	0.942	0.183	2.48581	2.68761e-82	1.33068	1.94507e-12
FB	Snhg11	GSMG0022081	small nucleolar RNA host gene 11	0.733	0.037	1.80696	3.55435e-179	1.17952	2.18045e-19
FB	Socs3	GSMG0007690	suppressor of cytokine signaling 3	0.674	0.1	1.60188	1.12227e-60	0.41734	0.0516891
FB	Spp1	GSMG0029510	secreted phosphoprotein 1	0.721	0.155	1.9087	1.19073e-43	-1.17422	3.33882e-06
FB	Tgfbi	GSMG0009836	transforming growth factor, beta induced	0.837	0.083	3.17416	9.22021e-124	0.934862	4.61984e-05
FB	Vcam1	GSMG0025967	vascular cell adhesion molecule 1	0.802	0.158	1.92609	9.52324e-58	1.31333	5.92614e-13

## Sheet: PC
Transcript identification				Expression in single-cell (Vanlandewijck et al., 2018)				MV RNA seq analysis
								P15 vs P5
Cluster	Gene	Stable ID	Name	% of cells expressed in cluster	% of cells expressed in other clusters	logFC	Adjusted P-value	log2FoldChange	Adjusted P-value
PC	Abcc9	GSMG0033855	ATP-binding cassette, sub-family C (CFTR/MRP), member 9	0.972	0.144	2.57273	0	-0.642521	0.00109439
PC	Angptl2	GSMG0020937	angiopoietin-like 2	0.671	0.114	1.60026	1.05788e-259	0.135724	0.654925
PC	Art3	GSMG0029424	ADP-ribosyltransferase 3	0.905	0.124	2.15585	0	0.490866	0.0160041
PC	Cd248	GSMG0019292	CD248 antigen, endosialin	0.886	0.146	1.61392	0	-0.278394	0.0900859
PC	Enpep	GSMG0026052	glutamyl aminopeptidase	0.883	0.131	1.76494	0	0.830645	7.33495e-06
PC	Ggt1	GSMG0003164	gamma-glutamyltransferase 1	0.816	0.091	1.91271	0	0.722968	0.00376302
PC	Ggt5	GSMG0003165	gamma-glutamyltransferase 5	0.866	0.143	1.78828	0	0.588745	0.00288753
PC	Ifi30	GSMG0038563	interferon gamma inducible protein 30	0.771	0.119	1.64974	0	-0.348862	0.297833
PC	Kcnj8	GSMG0033854	potassium inwardly-rectifying channel, subfamily J, member 8	0.988	0.152	2.87739	0	-0.340497	0.0656964
PC	Pla1a	GSMG0015728	phospholipase A1 member A	0.875	0.093	1.94015	0	0.856772	9.47138e-06
PC	Plxdc1	GSMG0007316	plexin domain containing 1	0.822	0.088	1.81088	0	0.307546	0.110825
PC	Slc6a20a	GSMG0041491	solute carrier family 6 (neurotransmitter transporter), member 20A	0.991	0.132	2.2509	0	1.03841	4.57897e-09
PC	Trpc3	GSMG0025323	transient receptor potential cation channel, subfamily C, member 3	0.813	0.098	1.62964	0	0.229373	0.260385
PC	Uchl1	GSMG0029238	ubiquitin carboxy-terminal hydrolase L1	0.801	0.127	1.66901	0	-0.668204	1.85304e-05

## Sheet: VSMC
Transcript identification				Expression in single-cell (Vanlandewijck et al., 2018)				MV RNA seq analysis
								P15 vs P5
Cluster	Gene	Stable ID	Name	% of cells expressed in cluster	% of cells expressed in other clusters	logFC	Adjusted P-value	log2FoldChange	Adjusted P-value
VSMC	Acta2	GSMG0020318	actin, alpha 2, smooth muscle, aorta	0.953	0.363	5.05686	1.18073e-170	2.61775	2.88825e-08
VSMC	Atp1b1	GSMG0002359	ATPase, Na+/K+ transporting, beta 1 polypeptide	0.694	0.079	1.59338	9.19193e-217	-0.0282715	0.926428
VSMC	Des	GSMG0000445	desmin	0.865	0.199	1.62242	1.90676e-166	0.710707	0.000111313
VSMC	Filip1l	GSMG0015137	filamin A interacting protein 1-like	0.886	0.273	1.67719	2.01398e-139	0.884442	4.79608e-07
VSMC	Ltbp1	GSMG0016928	latent transforming growth factor beta binding protein 1	0.62	0.088	1.5676	7.09444e-161	1.85597	1.12315e-07
VSMC	Map1b	GSMG0011019	microtubule-associated protein 1B	0.717	0.291	1.648	1.42809e-80	-1.7462	1.16806e-28
VSMC	Mcam	GSMG0039428	melanoma cell adhesion molecule	0.96	0.383	1.55281	1.2233e-128	-0.060673	0.824031
VSMC	Mustn1	GSMG0011384	musculoskeletal, embryonic nuclear protein 1	0.872	0.111	1.99356	1.13399e-273	2.09996	1.67239e-17
VSMC	Myh11	GSMG0015475	myosin, heavy polypeptide 11, smooth muscle	0.933	0.189	3.38383	8.53541e-244	2.60009	0.00110456
VSMC	Mylk	GSMG0014927	myosin, light polypeptide kinase	0.99	0.396	1.92057	4.7114e-158	0.380772	0.207711
VSMC	Npy1r	GSMG0037342	neuropeptide Y receptor Y1	0.714	0.08	1.70069	2.17776e-218	0.652966	0.0328808
VSMC	Nr4a1	GSMG0013663	nuclear receptor subfamily 4, group A, member 1	0.758	0.333	1.58615	2.11178e-68	2.31193	2.11874e-28
VSMC	Nrip2	GSMG0032514	nuclear receptor interacting protein 2	0.859	0.184	2.07791	4.29673e-203	1.93786	3.78965e-17
VSMC	Palld	GSMG0038479	palladin, cytoskeletal associated protein	0.626	0.065	1.70436	2.90217e-202	0.551628	0.0606631
VSMC	Pdlim3	GSMG0037245	PDZ and LIM domain 3	0.62	0.021	1.77403	0	3.83537	9.61372e-12
VSMC	Pln	GSMG0002996	phospholamban	0.653	0.126	2.54104	1.26254e-145	1.04895	9.03135e-06
VSMC	Rasl12	GSMG0039682	RAS-like, family 12	0.886	0.177	1.55722	2.94845e-188	0.693807	1.2064e-05
VSMC	Rcan2	GSMG0016690	regulator of calcineurin 2	0.667	0.147	1.73166	6.59953e-124	0.788608	5.16103e-05
VSMC	Tagln	GSMG0040695	transgelin	0.832	0.124	3.37346	5.82077e-244	2.55369	8.25621e-32
VSMC	Tpm2	GSMG0027729	tropomyosin 2, beta	0.973	0.257	2.87842	4.38495e-221	1.71378	6.24636e-15
VSMC	Uba2	GSMG0035783	ubiquitin-like modifier activating enzyme 2	0.912	0.376	1.55854	8.62062e-118	0.110452	0.638002
