# Supplementary material for: In mice and humans, brain microvascular contractility matures postnatally Brain microvessel post-natal maturation
Source: Research Square preprint supplement (doi:10.21203/rs.3.rs-1608620/v1), 2022-05-11
Supplement: Supplementary file 5 [file 4c286affa78023e5a65f0116.xlsx]

## Sheet: Fig.1
Fig. 1B
Abcc9/Pecam1
		Number of values	Median	Mean	Std. Deviation	Std. Error of Mean	Mann Whitney test (two-tailed)
P5	Cortex	4	3.38	3.38	0.3438	0.1719	>0,99
	MV	4	3.205	3.513	0.842	0.421
P15	Cortex	4	4.51	5.433	2.395	1.197	0.2
	MV	4	2.45	2.93	1.301	0.6503
Kcnj8/Pecam1
		Number of values	Median	Mean	Std. Deviation	Std. Error of Mean	Mann Whitney test (two-tailed)
P5	Cortex	4	2.54	2.533	0.3464	0.1732	0.6857
	MV	4	2.36	2.195	0.414	0.207
P15	Cortex	4	2.23	2.375	0.4652	0.2326	0.2
	MV	4	1.465	1.71	0.6218	0.3109

## Sheet: Fig. 3
Fig. 3A											Fig.D-E
							Kruskal-Wallis test	Mann Whitney test (one-tailed)			Fig. 3D
Acta2		Number of values	Median	Mean	Std. Deviation	Std. Error of Mean		P5	P10		Proportion of vessels		Number of values (samples)	Median	Mean	Std. Deviation	Std. Error of Mean	Chi²	Mann Whitney test (one-tailed)
	P5	3	9.85	9.813	0.4062	0.2345	0.0038				0-10	P5	3	0.1282	0.2247	0.2025	0.1169	<0.0001	0.05
	P10	4	17.07	17.86	4.453	2.226		0.0286				P15	3	0.7909	0.7985	0.02172	0.01254
	P15	4	26.44	25.49	5.177	2.589		0.0286	0.0571		10-100	P5	3	0.8673	0.757	0.1949	0.1125		0.05
	P5 - normalized	3	1	1	0.04	0.02309						P15	3	0.1149	0.11	0.008627	0.004981
	P10 - normalized	4	1.74	1.82	0.4517	0.2258					>100	P5	3	0.01064	0.0183	0.0231	0.01333		0.05
	P15 - normalized	4	2.695	2.598	0.5289	0.2644						P15	3	0.1034	0.1053	0.003258	0.001881
Myh11		Number of values	Median	Mean	Std. Deviation	Std. Error of Mean		P5	P10		Fig. 3E
	P5	3	1.16	1.01	0.4732	0.2732	0.0184				Diameters							Kruskal-Wallis test	Mann Whitney test (two-tailed)
	P10	4	3.755	3.738	0.6641	0.3321		0.0286					Number of values (vessels)	Median	Mean	Std. Deviation	Std. Error of Mean		0-10	10-100
	P15	4	6.005	5.658	2.067	1.033		0.0286	0.1714			0-10	247	5.31	5.961	3.084	0.1962	<0.0001
	P5 - normalized	3	1.15	1	0.4732	0.2732						10-100	39	8.92	9.231	3.084	0.4938		<0.0001
	P10 - normalized	4	3.715	3.698	0.6561	0.3281						>100	27	12.77	13.5	5.565	1.071		<0.0001	0.0007
	P15 - normalized	4	5.94	5.598	2.045	1.023
SM22		Number of values	Median	Mean	Std. Deviation	Std. Error of Mean		P5	P10
	P5	3	1.14	0.9367	0.3522	0.2033	0.0014
	P10	4	3.295	3.395	0.7774	0.3887		0.0286
	P15	4	6.415	5.858	1.298	0.6489		0.0286	0.0286
	P5 - normalized	3	1.22	1.003	0.3753	0.2167
	P10 - normalized	4	3.515	3.623	0.8292	0.4146
	P15 - normalized	4	6.85	6.255	1.384	0.692
Atp1b1		Number of values	Median	Mean	Std. Deviation	Std. Error of Mean		P5	P10
	P5	4	0.3495	0.3819	0.08162	0.04081	0.8891
	P10	5	0.3686	0.4085	0.1265	0.05657		0.4524
	P15	4	0.3479	0.3655	0.1616	0.08081		0.4429	0.3651
	P5 - normalized	4	0.915	1	0.2159	0.1079
	P10 - normalized	5	0.97	1.07	0.3301	0.1476
	P15 - normalized	4	0.915	0.8825	0.5428	0.2714

## Sheet: Fig.4
Fig. 4A
Myh11							Kruskal-Wallis test	Mann Whitney test (one-tailed)
		Number of values	Median	Mean	Std. Deviation	Std. Error of Mean		P5	P15	P30
	P5	4	0.875	1.003	0.4398	0.2199	<0.0001
	P15	4	22.85	23.66	6.001	3		0.0143
	P30	3	65.41	66.4	6.606	3.814		0.0286	0.0286
	P60	3	47.44	47.92	3.828	2.21		0.0286	0.0286	0.05
SMA							Kruskal-Wallis test	Mann Whitney test (one-tailed)
		Number of values	Median	Mean	Std. Deviation	Std. Error of Mean		P5	P15	P30
	P5	4	1.09	1.003	0.2243	0.1121	0.0013
	P15	4	8.67	10.25	5.153	2.577		0.0143
	P30	4	17.2	16.48	4.317	2.158		0.0143	0.0571
	P60	3	19.61	20.06	6.003	3.466		0.0286	0.0571	0.3143
Fig. 4B-D
							Kruskal-Wallis test	Mann Whitney test (one-tailed)
Network length		Number of values	Median	Mean	Std. Deviation	Std. Error of Mean		P5	P15
	P5	3	9.327e-06	8.986e-06	2.3e-06	1.328e-06	0.0036
	P15	3	1.198e-05	1.257e-05	1.174e-06	6.777e-07		0.05
	P60	3	2.4e-05	2.167e-05	4.933e-06	2.848e-06		0.05	0.05
Number of primary branches		Number of values	Median	Mean	Std. Deviation	Std. Error of Mean		P5	P15
	P5	3	5.26e-08	5.43e-08	4.973e-09	2.871e-09	0.6286
	P15	3	4.72e-08	4.987e-08	1.095e-08	6.32e-09		0.35
	P60	3	5.1e-08	4.487e-08	1.097e-08	6.334e-09		0.2	0.5
Number of branches		Number of values	Median	Mean	Std. Deviation	Std. Error of Mean		P5	P15
	P5	3	7.741e-08	8.193e-08	1.488e-08	8.59e-09	0.0036
	P15	3	1.231e-07	1.391e-07	3.858e-08	2.227e-08		0.05
	P60	3	3.45e-07	2.917e-07	9.238e-08	5.333e-08		0.05	0.05
Number of ramifications		Number of values	Median	Mean	Std. Deviation	Std. Error of Mean		P5	P15
	P5	3	1.24e-08	1.367e-08	4.729e-09	2.73e-09	0.0036
	P15	3	3.53e-08	3.663e-08	7.193e-09	4.153e-09		0.05
	P60	3	1.42e-07	1.222e-07	3.955e-08	2.283e-08		0.05	0.05
Median straigthness		Number of values	Median	Mean	Std. Deviation	Std. Error of Mean		P5	P15
	P5	3	0.95	0.9497	0.005508	0.00318	0.3393
	P15	3	0.917	0.929	0.02615	0.0151		0.35
	P60	3	0.933	0.9263	0.01242	0.007172		0.05	0.5

## Sheet: Fig.5
Fig. 5A-C
Max amplitude							Kruskal-Wallis test	Mann Whitney test (one-tailed)
		Number of values	Median	Mean	Std. Deviation	Std. Error of Mean		P5	P15
	P5	13	4.551	6.505	5.03	1.39	0.0095
	P15	9	13.65	14.15	7.823	2.6		0.017
	P60	8	14.58	18.07	13.67	4.83		0.006	0.8148
Slope							Kruskal-Wallis test	Mann Whitney test (one-tailed)
		Number of values	Median	Mean	Std. Deviation	Std. Error of Mean		P5	P15
	P5	13	-0.7172	-0.9008	1.061	0.2941	0.0066
	P15	9	-1.054	-1.469	1.029	0.3431		0.1858
	P60	8	-3.395	-3.219	1.414	0.4999		0.0045	0.0111
Fig. 5D
Tbxa2r							Kruskal-Wallis test	Mann Whitney test (one-tailed)
		Number of values	Median	Mean	Std. Deviation	Std. Error of Mean		P5	P15
	P5	3	3.445	3.453	1.278	0.738	0.5535
	P15	4	6.462	7.602	4.944	2.472		0.2
	P60	5	7.234	7.524	2.519	1.126		0.0357	0.4524
	P5 - normalized	3	1	1	0.37	0.2136
	P15 - normalized	4	1.87	2.2	1.434	0.7172
	P60 - normalized	5	2.1	2.178	0.7308	0.3268
Fig. 5E-F
							ANOVA	Tukey's multiple comparisons test
Whole cortex		Number of values	Median	Mean	Std. Deviation	Std. Error of Mean		P5	P15
	P5	10	48.17	44.89	11.82	3.738	< 0.0001
	P15	9	175.8	184.5	52.34	17.45		<0.0001
	P30	10	177.1	176.6	22.34	7.063		<0.0001	0.8581
Ratio Dorsal/lateral		Number of values	Median	Mean	Std. Deviation	Std. Error of Mean
	P5	10	0.7379	0.6845	0.1664	0.05261	0.0001
	P15	9	0.7747	0.7711	0.08184	0.02728		0.2314
	P30	10	0.9364	0.9364	0.05229	0.01654		<0.0001	0.0096

## Sheet: Fig.6
Fig.6A,C
							Kruskal-Wallis test	Mann Whitney test (one-tailed)
Number of MYH11+ objects		Number of values	Median	Mean	Std. Deviation	Std. Error of Mean		prenatal	0-2 years	2-5 years
	Pre-natal	6	9.385e-08	1.42e-07	1.096e-07	4.476e-08	0.0014
	0-2 years	4	7.705e-07	8.145e-07	2.379e-07	1.19e-07		0.0048
	2-5 years	4	1.285e-06	1.485e-06	5.145e-07	2.572e-07		0.0048	0.0286
	>10 years	8	1.295e-06	1.526e-06	7.395e-07	2.614e-07		0.0003	0.0162	0.4667
MYH11+ surface		Number of values	Median	Mean	Std. Deviation	Std. Error of Mean		prenatal	0-2 years	2-5 years
	Pre-natal	6	0	0.01167	0.01835	0.007491	0.0011
	0-2 years	4	0.14	0.1425	0.02986	0.01493		0.0048
	2-5 years	4	0.315	0.3225	0.1315	0.06575		0.0048	0.0286
	>10 years	8	0.33	0.3514	0.1682	0.06356		0.0006	0.0061	0.3818
Fig.6B, D
							Kruskal-Wallis test	Mann Whitney test (one-tailed)
Number of SMA+ objects		Number of values	Median	Mean	Std. Deviation	Std. Error of Mean		prenatal	0-2 years	2-5 years
	Pre-natal	5	2.4e-06	3.22e-06	1.684e-06	7.533e-07	0.0066
	0-2 years	4	5.05e-06	4.75e-06	2.935e-06	1.468e-06		0.2778
	2-5 years	4	8.3e-06	8.975e-06	3.892e-06	1.946e-06		0.0159	0.1714
	>10 years	7	9.4e-06	1.027e-05	2.687e-06	1.016e-06		0.0013	0.003	0.2758
SMA+ surface		Number of values	Median	Mean	Std. Deviation	Std. Error of Mean		prenatal	0-2 years	2-5 years
	Pre-natal	5	0.28	0.276	0.1258	0.05627	0.0061
	0-2 years	4	0.49	0.4625	0.1855	0.09277		0.0952
	2-5 years	4	0.755	0.8275	0.2532	0.1266		0.0079	0.0286
	>10 years	7	0.67	0.6971	0.1576	0.05955		0.0013	0.0545	0.2182
